# Supplementary material
Source: publisher figshare collection journal article supplement (https://gsajournals.figshare.com/articles/dataset/_/13013894)
Supplement: Supplementary file 1 [file 1]

## Sheet: Description
Tabs	Description
WT+ vs. WT-	RNA-seq data for the comparison treated wild-type (SN148a) vs. untreated WT
ste11- vs. WT-	RNA-seq data for the comparison untreated ste11Δ/Δ vs. untreated WT
ste11- vs. WT+	RNA-seq data for the comparison untreated ste11Δ/Δ vs. treated WT
WT+ vs. WT- GO	Genes up-regulated (1.5 cut off) and down-regulated (-1.5 cut off) caracterized using the Process Ontology in the CGD Gene Ontology Term Finder
ste11- vs. WT- GO
ste11- vs. WT+ GO
MAPK	Transcription profile of the genes involved in the pheromone response pathway for the three comparisons
cek2- vs. WT-	Genes up-regulated (˃1.5 fold-change) in untreated cek2Δ/Δ versus untreated CAI4 (WT) in the absence of pheromone (Rastghalam et al. 2019) and caracterization using the Process Ontology in the CGD Gene Ontology Term Finder

## Sheet: WT+ vs. WT-
Feature	baseMean	log2FoldChange	lfcSE	stat	pvalue	padj	weight
C1_05630C_A	22.5234	-8.06714	1.80661	-4.46535	7.99396e-06	0.000633224	2.01181
C6_01860C_A	8.65021	-6.65616	2.29152	-2.90469	0.00367613	0.312393	0.668426
C6_01200W_A	7.49753	-6.45092	2.38441	-2.70546	0.00682108	1	0.0524941
C4_06970C_A	5.88733	-6.24156	2.79575	-2.23252	0.0255808	1	0.0813911
C7_04270C_A	6.04387	-6.13286	2.96944	-2.06533	0.0388921	1	0.0813911
C4_02660W_A	5.55559	-6.03451	2.59845	-2.32235	0.0202142	0.935467	0.511811
C6_03730C_A	5.55559	-6.03451	2.59845	-2.32235	0.0202142	1	0
C1_00360W_A	5.19218	-5.92581	2.67046	-2.21902	0.0264852	0.935467	0.668426
C6_01360W_A	5.04681	-5.88002	2.70299	-2.17538	0.0296019	1	0.511811
C1_09510W_A	4.90145	-5.83283	2.73826	-2.13012	0.0331614	1	0
CR_03570C_A	4.75608	-5.78412	2.77691	-2.08293	0.0372573	1	0.668426
C2_07580W_A	4.61071	-5.73394	2.81965	-2.03357	0.0419953	1	0
C1_12470W_A	4.53803	-5.70833	2.84357	-2.00745	0.0447019	1	0
C7_04170W_A	4.53803	-5.70833	2.84357	-2.00745	0.0447019	1	0
C1_12000C_A	4.31998	-5.6296	2.92965	-1.9216	0.0546567	1	0.668426
C1_04880C_A	4.31998	-5.6296	2.92965	-1.9216	0.0546567	1	0.668426
C1_14470W_A	3.77952	-5.60548	3.25371	-1.7228	0.0849252	1	0
CR_06270W_A	4.17462	-5.57674	3.01378	-1.85041	0.0642538	1	0.668426
C5_05000C_A	3.63415	-5.54919	3.30078	-1.68118	0.0927287	1	0
C1_08970W_A	3.31267	-5.24748	3.19619	-1.64179	0.100633	1	0
C2_06460W_A	2.83464	-5.19215	3.62602	-1.43191	0.152169	1	0.511811
C1_08890C_A	3.02194	-5.12112	3.70854	-1.3809	0.16731	1	0.511811
C4_00690C_A	2.74145	-5.01204	3.36503	-1.48945	0.136369	1	0.668426
CR_10210W_A	2.59609	-4.92386	3.44543	-1.4291	0.152975	1	0.511811
C3_02900W_A	2.37804	-4.7807	3.58716	-1.33273	0.182622	1	0
C3_00250C_A	2.10781	-4.76622	4.08091	-1.16793	0.242834	1	0
CR_07510W_A	1.88976	-4.6092	4.26829	-1.07987	0.2802	1	0
C1_14430C_A	1.81708	-4.55285	4.3384	-1.04943	0.29398	1	0
CR_10690W_A	1.81708	-4.55285	4.3384	-1.04943	0.29398	1	0
C6_04610C_A	1.81708	-4.55285	4.3384	-1.04943	0.29398	1	0.668426
C1_08200W_A	1.59903	-4.36897	4.57724	-0.954499	0.339831	1	0.668426
C6_02450W_A	1.52634	-4.30205	4.66868	-0.92147	0.356805	1	0.511811
CR_10000C_A	1.52634	-4.30205	4.66868	-0.92147	0.356805	1	0.668426
C3_06980W_A	3.97699	-4.30068	2.67353	-1.60861	0.107701	1	0
C3_06140W_A	1.58878	-4.24738	4.19388	-1.01276	0.311176	1	0
C5_03780C_A	1.45366	-4.23183	4.76709	-0.887718	0.374693	1	0
CR_00800C_A	7.4032	-4.21076	2.04088	-2.06321	0.0390923	1	0.0813911
C7_01590C_A	1.30829	-4.08444	4.86402	-0.839726	0.401062	1	0.511811
C1_10080W_A	1.30829	-4.08444	4.86402	-0.839726	0.401062	1	0
C4_00210W_A	1.23561	-4.00633	4.86815	-0.822968	0.410526	1	0
CR_07740W_A	11.1406	-3.98655	1.71344	-2.32663	0.0199849	0.861947	0.668426
CR_02630C_A	4.78668	-3.986	2.43481	-1.63709	0.101612	1	0.511811
C1_03060C_A	1.16293	-3.92368	4.87274	-0.805231	0.420686	1	0
C4_02260C_A	1.16293	-3.92368	4.87274	-0.805231	0.420686	1	0.668426
C7_01610W_A	1.16293	-3.92368	4.87274	-0.805231	0.420686	1	0.668426
C4_06200W_A	4.63107	-3.87903	2.54973	-1.52135	0.128172	1	0
C1_09150W_A	1.09025	-3.83592	4.87786	-0.786394	0.431637	1	0
C3_04660C_A	1.09025	-3.83592	4.87786	-0.786394	0.431637	1	0.668426
CR_01550C_A	4.4857	-3.82714	2.60831	-1.46728	0.142299	1	0
C3_06190C_A	5.45101	-3.76994	2.29191	-1.64489	0.0999928	1	0.511811
C2_04010C_A	1.01756	-3.74237	4.88363	-0.766309	0.443492	1	0
C1_08710W_A	1.01756	-3.74237	4.88363	-0.766309	0.443492	1	0
C6_02960W_A	1.01756	-3.74237	4.88363	-0.766309	0.443492	1	0.668426
C3_00590W_A	5.57587	-3.73027	2.41792	-1.54276	0.122889	1	0
C4_06980W_A	25.7583	-3.67151	1.18186	-3.10657	0.00189273	0.0597909	2.92919
C4_02720C_A	0.944879	-3.6422	4.89018	-0.7448	0.456392	1	0
C4_04080C_A	0.944879	-3.6422	4.89018	-0.7448	0.456392	1	0
CR_02440W_A	0.944879	-3.6422	4.89018	-0.7448	0.456392	1	0
CR_05020W_A	0.944879	-3.6422	4.89018	-0.7448	0.456392	1	0
C3_01080W_A	6.16751	-3.56232	2.24594	-1.58611	0.112713	1	0.0813911
CR_00280C_A	6.0324	-3.56093	2.20725	-1.61329	0.106683	1	0.511811
C3_04510W_A	0.872196	-3.55702	4.89208	-0.727097	0.467166	1	0
C7_04190C_A	0.872196	-3.55702	4.89208	-0.727097	0.467166	1	0.668426
C4_07150W_A	0.872196	-3.55702	4.89208	-0.727097	0.467166	1	0.511811
C1_04570C_A	0.872196	-3.55702	4.89208	-0.727097	0.467166	1	0.511811
CR_08130W_A	0.872196	-3.55702	4.89208	-0.727097	0.467166	1	0.668426
C7_03880C_A	0.872196	-3.55702	4.89208	-0.727097	0.467166	1	0
C1_01990W_A	37.179	-3.54687	0.996652	-3.55879	0.000372571	0.0204317	2.01181
C4_06950W_A	4.78661	-3.51017	2.49112	-1.40907	0.158814	1	0.668426
C3_02910W_A	0.799513	-3.47149	4.89265	-0.70953	0.477996	1	0.668426
C7_03210W_A	0.799513	-3.47149	4.89265	-0.70953	0.477996	1	0.511811
CR_10650W_A	0.799513	-3.47149	4.89265	-0.70953	0.477996	1	0
C1_12280C_A	0.799513	-3.47149	4.89265	-0.70953	0.477996	1	0
CR_04710W_A	0.799513	-3.47149	4.89265	-0.70953	0.477996	1	0.668426
C4_01130C_A	0.799513	-3.47149	4.89265	-0.70953	0.477996	1	0
C4_06960W_A	4.64124	-3.46044	2.54351	-1.3605	0.173672	1	0
C2_06800C_A	5.5963	-3.43995	2.28541	-1.50518	0.132278	1	0.668426
C2_05090W_A	9.16779	-3.43916	1.83771	-1.87144	0.0612835	1	0.668426
C3_02570W_A	5.65873	-3.4321	2.39473	-1.43319	0.151804	1	0.0274261
C5_04720C_A	11.6389	-3.42457	1.66463	-2.05726	0.0396613	1	0.0274261
C1_12220W_A	5.45093	-3.39718	2.31505	-1.46743	0.142258	1	0
CR_08110W_A	0.72683	-3.37871	4.89332	-0.690474	0.489896	1	0
C1_07860W_A	0.72683	-3.37871	4.89332	-0.690474	0.489896	1	0.511811
CR_03340C_A	5.37825	-3.37531	2.33072	-1.44818	0.147566	1	0.668426
C4_06390W_A	17.2453	-3.37526	1.41345	-2.38796	0.016942	1	0.0813911
C1_03270W_A	9.95698	-3.35505	1.84048	-1.82292	0.0683148	1	0.0524941
C3_03200C_A	3.18766	-3.33259	3.30405	-1.00864	0.313148	1	0.668426
C3_03710W_A	5.08752	-3.28472	2.40142	-1.36783	0.171366	1	0
C4_01470W_A	0.654147	-3.2773	4.89409	-0.669645	0.503084	1	0.668426
C2_01020W_A	0.654147	-3.2773	4.89409	-0.669645	0.503084	1	0
CR_00470W_A	0.654147	-3.2773	4.89409	-0.669645	0.503084	1	0.511811
CR_00810W_A	0.654147	-3.2773	4.89409	-0.669645	0.503084	1	0.668426
CR_03370C_A	0.654147	-3.2773	4.89409	-0.669645	0.503084	1	0.511811
C1_05740C_A	0.654147	-3.2773	4.89409	-0.669645	0.503084	1	0
C1_06870C_A	5.01483	-3.26127	2.42135	-1.34688	0.178019	1	0
C6_04450W_A	3.78955	-3.24295	2.64298	-1.227	0.219821	1	0
C4_01340W_A	17.0262	-3.22797	1.37174	-2.35319	0.0186129	1	0.0274261
C2_08980C_A	8.61701	-3.21409	1.84904	-1.73825	0.0821672	1	0.0524941
C2_09180W_A	4.86947	-3.21356	2.46537	-1.30348	0.192412	1	0.511811
C1_11350C_A	10.5271	-3.2095	1.69451	-1.89406	0.0582173	1	0.0813911
C1_08470W_A	4.79678	-3.1894	2.49015	-1.28081	0.200262	1	0
C6_01520W_A	9.7019	-3.17731	1.99261	-1.59454	0.110814	1	0.668426
C3_07650C_A	1.68189	-3.17288	4.05771	-0.781937	0.434252	1	0.511811
C7_02280W_A	0.581464	-3.16543	4.89501	-0.646666	0.517848	1	0
C2_06360C_A	0.581464	-3.16543	4.89501	-0.646666	0.517848	1	0
C3_07880C_A	0.581464	-3.16543	4.89501	-0.646666	0.517848	1	0.668426
C4_02880C_A	0.581464	-3.16543	4.89501	-0.646666	0.517848	1	0.668426
C1_04150C_A	0.581464	-3.16543	4.89501	-0.646666	0.517848	1	0.511811
C7_04090C_A	0.581464	-3.16543	4.89501	-0.646666	0.517848	1	0
C3_01430W_A	0.581464	-3.16543	4.89501	-0.646666	0.517848	1	0
C1_07330W_A	0.581464	-3.16543	4.89501	-0.646666	0.517848	1	0
C4_05040W_A	0.581464	-3.16543	4.89501	-0.646666	0.517848	1	0.511811
C5_01750C_A	0.581464	-3.16543	4.89501	-0.646666	0.517848	1	0.511811
C4_06310C_A	0.581464	-3.16543	4.89501	-0.646666	0.517848	1	0.511811
C6_01770W_A	0.581464	-3.16543	4.89501	-0.646666	0.517848	1	0
C4_03960W_A	7.37122	-3.15838	1.98491	-1.5912	0.111565	1	0.668426
C4_04410C_A	20.6498	-3.15517	1.27368	-2.4772	0.0132419	0.391846	1.66843
C2_10680W_A	8.25359	-3.14764	1.88142	-1.67301	0.0943251	1	0.511811
C1_14330W_A	4.5163	-3.13798	2.4717	-1.26956	0.20424	1	0
C1_04710C_A	4.57874	-3.11738	2.58507	-1.20591	0.22785	1	0
C1_13770C_A	5.38842	-3.11259	2.32671	-1.33776	0.180974	1	0.511811
C1_06760C_A	6.19811	-3.10179	2.16299	-1.43403	0.151563	1	0.0524941
CR_08790W_A	8.09798	-3.08679	1.90973	-1.61635	0.106019	1	0.0274261
C2_00600C_A	4.36069	-3.08576	2.94911	-1.04634	0.295406	1	0
C1_11500C_A	10.1227	-3.07102	1.81079	-1.69595	0.0898945	1	0.0274261
C2_04960C_A	5.24306	-3.06796	2.36143	-1.29919	0.193877	1	0.511811
C1_13850C_A	0.508781	-3.0406	4.89612	-0.621023	0.534584	1	0
C7_01440W_A	0.508781	-3.0406	4.89612	-0.621023	0.534584	1	0
CR_10310W_A	0.508781	-3.0406	4.89612	-0.621023	0.534584	1	0
C1_03810C_A	0.508781	-3.0406	4.89612	-0.621023	0.534584	1	0
CR_00450C_A	2.61644	-3.03893	3.11915	-0.974281	0.329917	1	0
C2_02270C_A	6.92487	-3.0271	2.07687	-1.45753	0.14497	1	0.668426
C2_10270W_A	9.55149	-2.99018	1.81462	-1.64783	0.0993884	1	0.0524941
C3_07800C_A	4.0802	-2.96687	2.59461	-1.14347	0.252842	1	0
C5_01600C_A	2.86517	-2.9542	3.24119	-0.911455	0.362056	1	0.668426
C3_04230W_A	7.16335	-2.92469	1.99749	-1.46419	0.143143	1	0.668426
C4_06720W_A	13.4341	-2.9234	1.5476	-1.88899	0.058893	1	0.511811
C4_05660C_A	21.8329	-2.91275	1.28562	-2.26563	0.0234739	0.391846	2.93744
C2_09250W_A	3.93484	-2.90488	2.64411	-1.09862	0.271933	1	0
C6_03110C_A	4.73428	-2.90435	2.52622	-1.14968	0.250275	1	0.511811
C1_07650W_A	0.436098	-2.89927	4.89749	-0.591992	0.553856	1	0
C1_08830C_A	0.436098	-2.89927	4.89749	-0.591992	0.553856	1	0
CR_06550C_A	0.436098	-2.89927	4.89749	-0.591992	0.553856	1	0
C1_07040C_A	0.436098	-2.89927	4.89749	-0.591992	0.553856	1	0
C7_00220W_A	0.436098	-2.89927	4.89749	-0.591992	0.553856	1	0
C5_03630C_A	0.436098	-2.89927	4.89749	-0.591992	0.553856	1	0.511811
C5_05090W_A	0.436098	-2.89927	4.89749	-0.591992	0.553856	1	0
C2_09290W_A	8.89734	-2.88217	1.90424	-1.51355	0.130139	1	0.0274261
C5_02600W_A	12.6653	-2.87821	1.5468	-1.86076	0.0627784	1	0.0813911
C3_05820W_A	3.86216	-2.87293	2.67128	-1.07549	0.282156	1	0.511811
C4_06070C_A	2.05548	-2.86596	3.71523	-0.771408	0.440465	1	0.668426
C1_03610C_A	3.65436	-2.8542	2.67515	-1.06693	0.286004	1	0
C4_04190C_A	28.5896	-2.84787	0.988019	-2.8824	0.00394653	0.105884	2.92919
C3_03580C_A	9.01095	-2.83411	1.79357	-1.58016	0.114071	1	0.511811
C1_09710C_A	9.19825	-2.7964	1.85843	-1.50471	0.132398	1	0.668426
C2_07340W_A	8.32613	-2.78965	1.91132	-1.45954	0.144416	1	0.0813911
C5_03790W_A	6.58188	-2.7878	2.07545	-1.34323	0.179197	1	0.511811
C5_00140C_A	14.5446	-2.77831	1.50627	-1.84449	0.0651113	1	0.0813911
C2_08670C_A	6.5092	-2.76963	2.08627	-1.32755	0.184326	1	0.0274261
C3_00960W_A	4.23575	-2.76049	2.54645	-1.08405	0.278342	1	0.668426
C4_01000C_A	3.43631	-2.74977	2.74589	-1.00141	0.316626	1	0.511811
C1_14630C_A	2.18034	-2.74351	3.7947	-0.722986	0.469688	1	0
C7_01900W_A	9.9035	-2.7425	1.71893	-1.59547	0.110608	1	0.0524941
C4_00480W_A	0.363415	-2.7362	4.89925	-0.558494	0.576507	1	0.511811
C1_04250C_A	0.363415	-2.7362	4.89925	-0.558494	0.576507	1	0
C5_05280C_A	0.363415	-2.7362	4.89925	-0.558494	0.576507	1	0.511811
C3_07690C_A	0.363415	-2.7362	4.89925	-0.558494	0.576507	1	0.668426
C4_05020W_A	0.363415	-2.7362	4.89925	-0.558494	0.576507	1	0.511811
CR_03590C_A	0.363415	-2.7362	4.89925	-0.558494	0.576507	1	0
C2_02060C_A	9.56159	-2.7354	1.91752	-1.42653	0.153717	1	0.668426
CR_00390W_A	9.25754	-2.71078	1.70122	-1.59343	0.111064	1	0.0813911
C4_02770C_A	5.48146	-2.68068	2.28629	-1.1725	0.240996	1	0.511811
C2_02010C_A	3.35337	-2.67762	3.22559	-0.830118	0.406472	1	0.668426
CR_01640C_A	4.05862	-2.67562	2.81508	-0.950459	0.341879	1	0
C1_07790C_A	2.6993	-2.66032	3.06968	-0.866646	0.386136	1	0
CR_03230W_A	21.2604	-2.62363	1.25914	-2.08367	0.0371904	0.531493	2.88804
C7_00770W_A	14.4196	-2.61163	1.51739	-1.72113	0.0852265	1	0.0813911
C3_02620C_A	7.30856	-2.58841	2.10618	-1.22896	0.219087	1	0.0524941
CR_02490W_A	5.78237	-2.5729	2.21338	-1.16243	0.24506	1	0.0524941
C1_02190W_A	5.11805	-2.56811	2.38551	-1.07655	0.281682	1	0
CR_00460C_A	6.37401	-2.562	2.10091	-1.21947	0.222664	1	0.668426
C1_14190C_A	2.55393	-2.55989	3.1604	-0.809988	0.417947	1	0
C2_09490W_A	5.70969	-2.55162	2.22862	-1.14493	0.252236	1	0.0813911
C3_06370C_A	5.70969	-2.55162	2.22862	-1.14493	0.252236	1	0.0274261
C7_01290W_A	5.70969	-2.55162	2.22862	-1.14493	0.252236	1	0.0274261
C4_04310W_A	12.4573	-2.55068	1.58568	-1.60857	0.107711	1	0.0813911
CR_07120C_A	13.0489	-2.54655	1.54618	-1.647	0.0995587	1	0.0274261
C1_12850W_A	55.9655	-2.54462	0.81326	-3.12891	0.00175457	0.0769761	2.01181
C1_13590W_A	0.290732	-2.54308	4.9016	-0.518827	0.603881	1	0.511811
C7_01150W_A	0.290732	-2.54308	4.9016	-0.518827	0.603881	1	0.668426
C1_12060C_A	0.290732	-2.54308	4.9016	-0.518827	0.603881	1	0
C2_06270W_A	0.290732	-2.54308	4.9016	-0.518827	0.603881	1	0
C4_06300C_A	0.290732	-2.54308	4.9016	-0.518827	0.603881	1	0
C2_05960C_A	0.290732	-2.54308	4.9016	-0.518827	0.603881	1	0.511811
C1_05760C_A	0.290732	-2.54308	4.9016	-0.518827	0.603881	1	0
C2_00750W_A	0.290732	-2.54308	4.9016	-0.518827	0.603881	1	0
C3_00600W_A	0.290732	-2.54308	4.9016	-0.518827	0.603881	1	0
C1_00370W_A	0.290732	-2.54308	4.9016	-0.518827	0.603881	1	0
C4_07040W_A	0.290732	-2.54308	4.9016	-0.518827	0.603881	1	0
C7_03740C_A	0.290732	-2.54308	4.9016	-0.518827	0.603881	1	0
C1_08870C_A	0.290732	-2.54308	4.9016	-0.518827	0.603881	1	0
C7_01360C_A	0.290732	-2.54308	4.9016	-0.518827	0.603881	1	0
C5_01040W_A	0.290732	-2.54308	4.9016	-0.518827	0.603881	1	0.668426
C2_00680C_A	0.290732	-2.54308	4.9016	-0.518827	0.603881	1	0
C5_04990W_A	0.290732	-2.54308	4.9016	-0.518827	0.603881	1	0.668426
C1_06620C_A	0.290732	-2.54308	4.9016	-0.518827	0.603881	1	0
C4_07160W_A	0.290732	-2.54308	4.9016	-0.518827	0.603881	1	0.511811
C1_02690C_A	0.290732	-2.54308	4.9016	-0.518827	0.603881	1	0
C3_06660C_A	0.290732	-2.54308	4.9016	-0.518827	0.603881	1	0
C7_00160C_A	0.290732	-2.54308	4.9016	-0.518827	0.603881	1	0
C7_00500W_A	0.290732	-2.54308	4.9016	-0.518827	0.603881	1	0.511811
CR_02810W_A	0.290732	-2.54308	4.9016	-0.518827	0.603881	1	0
C4_00810C_A	0.290732	-2.54308	4.9016	-0.518827	0.603881	1	0
C4_02210W_A	0.290732	-2.54308	4.9016	-0.518827	0.603881	1	0
C7_02070W_A	0.290732	-2.54308	4.9016	-0.518827	0.603881	1	0.511811
C6_03030W_A	0.290732	-2.54308	4.9016	-0.518827	0.603881	1	0
C4_03340C_A	0.290732	-2.54308	4.9016	-0.518827	0.603881	1	0
C5_04580C_A	0.290732	-2.54308	4.9016	-0.518827	0.603881	1	0.668426
C3_05340W_A	0.290732	-2.54308	4.9016	-0.518827	0.603881	1	0.668426
C2_06840W_A	0.290732	-2.54308	4.9016	-0.518827	0.603881	1	0
C7_03300C_A	0.290732	-2.54308	4.9016	-0.518827	0.603881	1	0.511811
C2_02850W_A	0.290732	-2.54308	4.9016	-0.518827	0.603881	1	0
C3_05050W_A	0.290732	-2.54308	4.9016	-0.518827	0.603881	1	0
C4_03490C_A	0.290732	-2.54308	4.9016	-0.518827	0.603881	1	0.668426
C3_02200W_A	0.290732	-2.54308	4.9016	-0.518827	0.603881	1	0
CR_00300W_A	0.290732	-2.54308	4.9016	-0.518827	0.603881	1	0
C6_02620C_A	0.290732	-2.54308	4.9016	-0.518827	0.603881	1	0
C2_03480C_A	0.290732	-2.54308	4.9016	-0.518827	0.603881	1	0
CR_04990C_A	0.290732	-2.54308	4.9016	-0.518827	0.603881	1	0
CR_09360W_A	0.290732	-2.54308	4.9016	-0.518827	0.603881	1	0
CR_08310C_A	0.290732	-2.54308	4.9016	-0.518827	0.603881	1	0
C1_13200C_A	0.290732	-2.54308	4.9016	-0.518827	0.603881	1	0.668426
C2_07300C_A	0.290732	-2.54308	4.9016	-0.518827	0.603881	1	0
C1_07150W_A	0.290732	-2.54308	4.9016	-0.518827	0.603881	1	0.668426
C2_07690W_A	2.34614	-2.53982	3.21757	-0.789358	0.429903	1	0
C4_04230W_A	6.09353	-2.53202	2.12156	-1.19347	0.232685	1	0.668426
C4_03760W_A	5.637	-2.53003	2.24449	-1.12722	0.259651	1	0.0524941
C1_09880C_A	5.4292	-2.51473	2.23834	-1.12348	0.261234	1	0.511811
C3_04900W_A	5.56432	-2.50813	2.26108	-1.10926	0.267318	1	0
C6_04440C_A	12.0939	-2.50194	1.61274	-1.55136	0.120815	1	0.0813911
C4_01330W_A	4.80581	-2.50163	2.60874	-0.958942	0.337588	1	0.511811
C2_05180W_A	4.9	-2.49949	2.468	-1.01276	0.311176	1	0
C6_03950C_A	6.08328	-2.483	2.15078	-1.15446	0.248311	1	0.0274261
C4_02110W_A	4.82731	-2.47763	2.50447	-0.989284	0.322524	1	0.668426
C4_05310W_A	2.92753	-2.46758	2.95202	-0.835896	0.403214	1	0
C2_08600W_A	7.19388	-2.46595	1.97588	-1.24803	0.212021	1	0.668426
CR_04110W_A	5.41895	-2.46348	2.29683	-1.07255	0.283471	1	0.668426
C2_02450C_A	26.2737	-2.45375	1.04988	-2.33717	0.0194305	0.360729	2.88804
C3_02480C_A	8.43959	-2.45016	1.85016	-1.32429	0.185405	1	0.0524941
C3_07620C_A	7.12119	-2.44876	1.98516	-1.23353	0.217377	1	0.0524941
C1_08530W_A	5.78229	-2.44499	2.64023	-0.926052	0.354419	1	0.511811
C1_04090C_A	5.34627	-2.44075	2.31626	-1.05375	0.291999	1	0.511811
C1_10360C_A	8.02399	-2.43467	1.87757	-1.29671	0.194729	1	0.0274261
C2_04120C_A	1.5467	-2.424	4.18148	-0.5797	0.562117	1	0
C3_00890C_A	7.56747	-2.42022	1.92794	-1.25534	0.209356	1	0.0524941
C6_01470W_A	3.82007	-2.42016	2.61746	-0.924623	0.355162	1	0.668426
C1_00170W_A	10.5154	-2.41504	1.66794	-1.44792	0.147639	1	0.0274261
C1_01110C_A	13.4531	-2.39372	1.50759	-1.58778	0.112337	1	0.511811
C1_11280W_A	1.99297	-2.39316	3.75247	-0.637756	0.523632	1	0
C4_04600C_A	14.8032	-2.39244	1.64177	-1.45723	0.145053	1	0.0813911
C4_00560C_A	13.2146	-2.37831	1.75307	-1.35666	0.17489	1	0.0274261
C4_00490W_A	2.78216	-2.37454	3.02711	-0.784424	0.432791	1	0
CR_10440W_A	5.12822	-2.37147	2.38359	-0.994912	0.319779	1	0
C2_00870W_A	8.97897	-2.36945	1.78378	-1.32833	0.184069	1	0.0274261
C1_14400C_A	7.27673	-2.35344	1.96274	-1.19906	0.230505	1	0.0524941
C3_03360W_A	11.3721	-2.34786	1.58281	-1.48335	0.137982	1	0.0813911
C5_01720C_A	3.25911	-2.33738	3.06376	-0.762912	0.445516	1	0
C7_01100C_A	2.81284	-2.33526	3.25209	-0.718081	0.472708	1	0
C3_04380C_A	14.1901	-2.33435	1.48375	-1.57328	0.115655	1	0.0813911
C1_06110C_A	10.5256	-2.32952	1.66666	-1.39771	0.162199	1	0.511811
C1_02910C_A	10.7856	-2.31485	1.74429	-1.3271	0.184476	1	0.0813911
C1_06250W_A	3.39423	-2.3119	2.76287	-0.836775	0.402719	1	0
CR_04500C_A	6.40461	-2.31186	2.06691	-1.11851	0.263349	1	0.668426
C2_05620W_A	0.218049	-2.30556	4.90494	-0.470049	0.63832	1	0
C4_01580C_A	0.218049	-2.30556	4.90494	-0.470049	0.63832	1	0
CR_07060C_A	0.218049	-2.30556	4.90494	-0.470049	0.63832	1	0
C3_03350W_A	0.218049	-2.30556	4.90494	-0.470049	0.63832	1	0
C1_08880W_A	0.218049	-2.30556	4.90494	-0.470049	0.63832	1	0.668426
CR_02240C_A	0.218049	-2.30556	4.90494	-0.470049	0.63832	1	0
C2_10650W_A	0.218049	-2.30556	4.90494	-0.470049	0.63832	1	0
C5_01790C_A	0.218049	-2.30556	4.90494	-0.470049	0.63832	1	0
C1_04750W_A	0.218049	-2.30556	4.90494	-0.470049	0.63832	1	0
C7_02830C_A	0.218049	-2.30556	4.90494	-0.470049	0.63832	1	0.511811
C3_06790W_A	0.218049	-2.30556	4.90494	-0.470049	0.63832	1	0
C1_11710C_A	0.218049	-2.30556	4.90494	-0.470049	0.63832	1	0.668426
C1_12460C_A	0.218049	-2.30556	4.90494	-0.470049	0.63832	1	0
C4_00990W_A	0.218049	-2.30556	4.90494	-0.470049	0.63832	1	0
C5_05350W_A	7.05869	-2.30097	1.99091	-1.15574	0.247788	1	0.0813911
CR_03400W_A	7.05869	-2.30097	1.99091	-1.15574	0.247788	1	0.0813911
C6_03990C_A	7.05869	-2.30097	1.99091	-1.15574	0.247788	1	0.511811
CR_02060W_A	15.2893	-2.29592	1.45097	-1.58234	0.113572	1	0.668426
C2_05020W_A	8.23172	-2.29451	1.87281	-1.22517	0.220511	1	0.0813911
C6_00640C_A	4.77506	-2.29337	2.37609	-0.965187	0.334451	1	0
C4_02200C_A	4.69212	-2.28854	2.83667	-0.806772	0.419798	1	0.668426
C3_02670W_A	4.69212	-2.28854	2.83667	-0.806772	0.419798	1	0
C7_04360C_A	6.46704	-2.28288	2.07966	-1.09772	0.272327	1	0.0274261
CR_04830C_A	5.22133	-2.26826	2.27221	-0.998262	0.318152	1	0.668426
CR_08440W_A	4.70237	-2.26625	2.39415	-0.946579	0.343853	1	0
C3_05060W_A	5.35645	-2.26454	2.31506	-0.978174	0.327988	1	0.668426
C1_08150C_A	5.35645	-2.26454	2.31506	-0.978174	0.327988	1	0.511811
C4_02640C_A	6.39436	-2.26309	2.09165	-1.08197	0.279268	1	0.0524941
C1_08410C_A	10.0895	-2.2572	1.69824	-1.32914	0.183802	1	0.511811
C5_03830C_A	4.49457	-2.25626	2.41596	-0.933899	0.350356	1	0
C3_03920W_A	6.32168	-2.243	2.104	-1.06606	0.286395	1	0.0524941
C5_04030W_A	5.56317	-2.23923	2.44904	-0.91433	0.360543	1	0.668426
C5_02730C_A	13.453	-2.23102	1.5582	-1.4318	0.152201	1	0.0524941
C1_03400W_A	15.1541	-2.22652	1.45557	-1.52966	0.126101	1	0.0274261
C4_04950W_A	2.56411	-2.22286	3.16793	-0.701677	0.482881	1	0
C5_03840W_A	5.21108	-2.21786	2.36127	-0.939264	0.347595	1	0.511811
C5_05410C_A	7.83654	-2.21411	1.91194	-1.15804	0.246847	1	0.0524941
CR_04160C_A	12.1059	-2.21379	1.50664	-1.46935	0.141737	1	0.668426
CR_06510W_A	8.36369	-2.20691	1.71593	-1.28613	0.198399	1	0.668426
C1_11420W_A	6.62259	-2.1892	2.05382	-1.06592	0.286462	1	0.668426
C2_00350W_A	8.48037	-2.17175	1.82693	-1.18875	0.23454	1	0.668426
C1_04080W_A	5.51199	-2.15012	2.27511	-0.945061	0.344628	1	0
C1_00910W_A	3.34197	-2.14269	3.01649	-0.710328	0.477501	1	0.668426
C3_06480C_A	17.7499	-2.14182	1.38464	-1.54685	0.121901	1	0.511811
CR_10830C_A	7.66555	-2.14136	1.82226	-1.17512	0.239948	1	0.511811
CR_03010C_A	1.70224	-2.14011	4.00776	-0.53399	0.593348	1	0
C5_03470C_A	10.1416	-2.13751	1.86389	-1.1468	0.251463	1	0.668426
C3_00670C_A	7.81604	-2.13046	1.89547	-1.12398	0.261023	1	0.0274261
C3_05760W_A	6.85081	-2.1232	2.0189	-1.05166	0.292956	1	0.0813911
C2_04200W_A	19.5247	-2.12278	1.33617	-1.5887	0.112128	1	2.01181
C2_06160W_A	12.1344	-2.10325	1.93501	-1.08694	0.277063	1	0.0813911
CR_10750C_A	2.34606	-2.09848	3.67584	-0.570884	0.568078	1	0.668426
C3_02750W_A	10.9399	-2.08311	1.85624	-1.12222	0.261769	1	0.0524941
CR_05900W_A	16.1929	-2.08201	1.52739	-1.36312	0.172846	1	0.0813911
C5_05040W_A	8.93682	-2.07671	1.78494	-1.16346	0.244642	1	0.0274261
C1_05790W_A	3.4044	-2.07527	2.74119	-0.757068	0.449009	1	0
CR_03730C_A	7.3902	-2.07273	1.9369	-1.07013	0.284562	1	0.0524941
C5_01940W_A	6.18649	-2.06712	2.12853	-0.971151	0.331473	1	0.511811
C1_12190W_A	6.03087	-2.06396	2.5874	-0.797696	0.425047	1	0.668426
C2_09820W_A	31.1227	-2.06381	0.965355	-2.13788	0.0325266	0.612897	2.01181
C5_01340W_A	15.8602	-2.06252	1.42856	-1.44377	0.148804	1	0.511811
CR_01590C_A	20.6556	-2.06122	1.29929	-1.58642	0.112645	0.935467	2.88804
C1_07010W_A	5.97869	-2.05476	2.12722	-0.965937	0.334076	1	0.511811
C4_02890C_A	17.3239	-2.05396	1.40938	-1.45734	0.145022	1	0.0813911
C3_02720W_A	6.11381	-2.04569	2.14254	-0.954794	0.339682	1	0.0524941
C7_02750W_A	3.53952	-2.04387	2.69132	-0.759429	0.447596	1	0.668426
C7_03460W_A	8.40761	-2.02584	1.85465	-1.0923	0.2747	1	0.0274261
C3_01780C_A	5.59485	-2.02494	2.25744	-0.897005	0.369716	1	0
C5_02720W_A	6.4874	-2.02477	2.07587	-0.975384	0.32937	1	0.0274261
C2_03680W_A	9.89999	-2.02242	1.68126	-1.20292	0.229008	1	0.0813911
C3_02330C_A	7.30726	-2.00994	1.95631	-1.02741	0.304226	1	0.511811
C4_03740W_A	1.93046	-2.0029	3.79692	-0.527506	0.597842	1	0
C2_01510C_A	5.52217	-2.00152	2.27759	-0.87879	0.379515	1	0.668426
C2_05380W_A	16.4825	-2.00078	1.39272	-1.43659	0.150833	1	0.0274261
C2_00040C_A	0.145366	-1.9952	4.91018	-0.406339	0.684493	1	0
C3_03570C_A	0.145366	-1.9952	4.91018	-0.406339	0.684493	1	0
C5_00520W_A	0.145366	-1.9952	4.91018	-0.406339	0.684493	1	0
C1_07320W_A	0.145366	-1.9952	4.91018	-0.406339	0.684493	1	0
C7_02270W_A	0.145366	-1.9952	4.91018	-0.406339	0.684493	1	0
C2_06120C_A	0.145366	-1.9952	4.91018	-0.406339	0.684493	1	0.511811
CR_06670W_A	0.145366	-1.9952	4.91018	-0.406339	0.684493	1	0.511811
CR_04640W_A	0.145366	-1.9952	4.91018	-0.406339	0.684493	1	0
C2_02080W_A	0.145366	-1.9952	4.91018	-0.406339	0.684493	1	0
C2_08530C_A	0.145366	-1.9952	4.91018	-0.406339	0.684493	1	0.668426
C2_06930C_A	0.145366	-1.9952	4.91018	-0.406339	0.684493	1	0.511811
C1_06210W_A	0.145366	-1.9952	4.91018	-0.406339	0.684493	1	0
C4_03460C_A	0.145366	-1.9952	4.91018	-0.406339	0.684493	1	0
C3_02890C_A	0.145366	-1.9952	4.91018	-0.406339	0.684493	1	0
C3_05330C_A	0.145366	-1.9952	4.91018	-0.406339	0.684493	1	0
C1_10130W_A	0.145366	-1.9952	4.91018	-0.406339	0.684493	1	0
C5_04370C_A	0.145366	-1.9952	4.91018	-0.406339	0.684493	1	0
C3_01060W_A	0.145366	-1.9952	4.91018	-0.406339	0.684493	1	0
C4_02080W_A	0.145366	-1.9952	4.91018	-0.406339	0.684493	1	0
C2_08520C_A	0.145366	-1.9952	4.91018	-0.406339	0.684493	1	0
CR_06210C_A	0.145366	-1.9952	4.91018	-0.406339	0.684493	1	0
CR_04960C_A	0.145366	-1.9952	4.91018	-0.406339	0.684493	1	0
C2_09630C_A	0.145366	-1.9952	4.91018	-0.406339	0.684493	1	0.511811
CR_09350C_A	0.145366	-1.9952	4.91018	-0.406339	0.684493	1	0.668426
C4_02380W_A	0.145366	-1.9952	4.91018	-0.406339	0.684493	1	0
C2_10800W_A	0.145366	-1.9952	4.91018	-0.406339	0.684493	1	0.511811
CR_05330W_A	1.55687	-1.9937	4.16213	-0.479011	0.631931	1	0
C6_03290W_A	18.5173	-1.98988	1.38809	-1.43354	0.151705	1	2.01181
C3_00570C_A	11.7495	-1.97815	1.59834	-1.23763	0.215853	1	0.511811
C6_00380C_A	5.44948	-1.97791	2.2993	-0.860221	0.389667	1	0
C1_09610W_A	2.60496	-1.97552	3.34995	-0.589717	0.55538	1	0
C2_06710W_A	3.97554	-1.96335	2.64069	-0.743502	0.457178	1	0
C1_11890W_A	8.80163	-1.96218	1.79691	-1.09198	0.274843	1	0.668426
C2_06430C_A	2.23137	-1.95947	3.57189	-0.548581	0.583293	1	0
C6_03140C_A	22.3311	-1.95946	1.09499	-1.78948	0.0735368	0.925485	2.01181
C1_09860C_A	8.35535	-1.95646	1.83873	-1.06403	0.287317	1	0.511811
C2_07120W_A	10.9183	-1.9562	1.68858	-1.15848	0.246667	1	0.0274261
C3_06290W_A	18.3873	-1.94749	1.20454	-1.61679	0.105923	0.925485	2.88804
CR_06860C_A	40.9915	-1.9357	0.81478	-2.37574	0.0175139	0.326686	2.92919
C4_06490C_A	5.75039	-1.93368	2.22251	-0.870045	0.384276	1	0.0813911
C2_08120W_A	13.7423	-1.92503	1.52043	-1.26611	0.205475	1	0.0524941
CR_04780W_A	8.20999	-1.92453	1.85344	-1.03836	0.299103	1	0.0524941
C4_05330C_A	5.54259	-1.91657	2.20254	-0.870164	0.384211	1	0
CR_08800W_A	5.35323	-1.91409	2.10485	-0.909373	0.363153	1	0.668426
C3_00350W_A	9.53856	-1.91118	1.74528	-1.09506	0.27349	1	0.0813911
C4_00700C_A	9.77704	-1.9111	1.71847	-1.11209	0.266098	1	0.0813911
CR_04770C_A	11.687	-1.90428	1.60423	-1.18703	0.235215	1	0.0524941
C4_06840W_A	2.15869	-1.90406	3.62106	-0.525829	0.599007	1	0
C4_00650W_A	39.0365	-1.90138	0.830592	-2.28918	0.0220687	0.38303	2.88804
C4_03680C_A	2.8752	-1.9012	2.99261	-0.635298	0.525234	1	0
C4_04860W_A	15.9686	-1.90111	1.26582	-1.50188	0.133128	1	0.0524941
C1_12640W_A	1.1106	-1.88915	4.81043	-0.39272	0.694527	1	0
CR_03540W_A	5.60502	-1.8868	2.26115	-0.834445	0.40403	1	0
C3_01200W_A	11.3032	-1.88644	1.65775	-1.13795	0.25514	1	0.668426
C1_04840C_A	5.15875	-1.88434	2.41496	-0.780277	0.435228	1	0
C1_04320W_A	10.3482	-1.88345	1.70191	-1.10667	0.268439	1	0.0524941
CR_04360C_A	3.65305	-1.88057	2.89301	-0.650038	0.515668	1	0.511811
C1_11700C_A	29.9964	-1.87917	0.972288	-1.93272	0.0532701	0.650249	2.93744
C4_05380C_A	5.02363	-1.8764	2.31087	-0.811987	0.416799	1	0
C2_05470W_A	9.1854	-1.87477	1.76453	-1.06248	0.288019	1	0.0274261
C2_04820W_A	1.7851	-1.87206	3.92367	-0.477118	0.633278	1	0.668426
C3_03160C_A	1.7851	-1.87206	3.92367	-0.477118	0.633278	1	0
CR_00130C_A	3.62238	-1.86822	2.65594	-0.703413	0.481799	1	0
C5_00010W_A	2.29381	-1.86534	3.24255	-0.575269	0.565109	1	0.511811
C2_04190C_A	39.8041	-1.85931	0.853157	-2.17933	0.029307	0.450696	2.93744
C2_10300C_A	3.20678	-1.85885	3.05594	-0.608273	0.543006	1	0.511811
C3_03810W_A	13.472	-1.85189	1.51756	-1.22031	0.222348	1	0.668426
C2_06330C_A	10.6071	-1.8465	1.66282	-1.11046	0.266799	1	0.0813911
C2_01380W_A	2.08601	-1.84625	3.67285	-0.502674	0.615194	1	0.668426
C6_01500C_A	6.27952	-1.84279	2.11525	-0.871194	0.383648	1	0.0524941
C4_01220C_A	16.5549	-1.84065	1.46742	-1.25434	0.209718	1	0.0813911
C4_04120C_A	11.1158	-1.83781	1.63107	-1.12676	0.259846	1	0.0524941
CR_08770W_A	103.222	-1.83658	2.60825	-0.704142	0.481344	1	2.92919
C1_10060C_A	5.52101	-1.83622	2.44603	-0.750697	0.452835	1	0.668426
CR_10170C_A	5.69813	-1.83536	2.17363	-0.844373	0.398461	1	0.0274261
C7_03530C_A	1.41151	-1.82994	4.34036	-0.421609	0.67331	1	0.668426
CR_02800C_A	1.41151	-1.82994	4.34036	-0.421609	0.67331	1	0.511811
C5_05030C_A	2.38691	-1.82873	3.4715	-0.526783	0.598344	1	0
C1_07810C_A	8.28771	-1.82812	1.70869	-1.0699	0.284665	1	0.511811
C6_00030W_A	1.92021	-1.82741	3.50025	-0.522079	0.601615	1	0.511811
C7_01570C_A	0.59164	-1.82233	4.83266	-0.377087	0.706109	1	0.511811
C7_03440W_A	14.1363	-1.81874	1.50336	-1.20979	0.226361	1	0.668426
C4_06580W_A	13.0462	-1.81359	1.52997	-1.18537	0.235869	1	0.0524941
C5_03860W_A	9.26826	-1.81357	1.7583	-1.03144	0.302336	1	0.0813911
C6_00500C_A	6.95402	-1.8118	2.00627	-0.903068	0.36649	1	0.0274261
C1_07510W_A	6.95402	-1.8118	2.00627	-0.903068	0.36649	1	0.0274261
C5_03040W_A	4.67047	-1.81152	2.36269	-0.76672	0.443248	1	0
C4_02930W_A	10.0472	-1.81103	1.7898	-1.01186	0.311603	1	0.668426
C2_05360C_A	7.73188	-1.80856	1.91653	-0.943668	0.34534	1	0.0524941
CR_05650W_A	24.2868	-1.80801	1.2436	-1.45386	0.145985	1	2.88804
C1_11090C_A	3.88128	-1.80637	2.8191	-0.640761	0.521678	1	0
CR_07860C_A	3.88128	-1.80637	2.8191	-0.640761	0.521678	1	0
C1_11800C_A	1.03791	-1.80388	4.81237	-0.374842	0.707778	1	0
C3_06320W_A	10.3481	-1.79311	1.75497	-1.02174	0.306905	1	0.0524941
CR_06500C_A	14.4259	-1.78987	1.48446	-1.20573	0.22792	1	0.511811
C1_06180W_A	17.9633	-1.78332	1.25313	-1.4231	0.154707	1	0.0274261
C5_03740W_A	12.2161	-1.78214	1.59491	-1.1174	0.263825	1	0.668426
C4_05260W_A	12.5897	-1.78122	1.57084	-1.13393	0.256825	1	0.668426
C3_05810C_A	3.06141	-1.78091	3.11309	-0.572071	0.567274	1	0.511811
C7_00190W_A	23.9643	-1.77846	1.21953	-1.45832	0.144754	1	2.93744
C4_03800C_A	11.1566	-1.77694	1.64549	-1.07988	0.280194	1	0.511811
C3_07160W_A	17.4495	-1.76526	1.19499	-1.47722	0.139617	1	0.0274261
C3_02860W_A	8.06455	-1.76503	1.90323	-0.927387	0.353726	1	0.668426
CR_10450C_A	12.3307	-1.76473	1.55914	-1.13187	0.257691	1	0.511811
C5_00620W_A	5.6152	-1.75685	2.26718	-0.774906	0.438395	1	0.511811
CR_06770C_A	4.89869	-1.75342	2.31277	-0.758149	0.448362	1	0.511811
C4_00830W_A	17.0534	-1.74925	1.37964	-1.2679	0.204833	1	0.0524941
CR_02470W_A	7.99698	-1.74825	1.73789	-1.00596	0.314435	1	0.0524941
C1_03660W_A	1.33882	-1.74016	4.44044	-0.391889	0.69514	1	0.668426
C1_12570C_A	2.61514	-1.73934	3.33087	-0.522187	0.60154	1	0.668426
C6_01840C_A	13.0461	-1.73856	1.54549	-1.12492	0.260621	1	0.511811
C4_01940W_A	1435.81	-1.73693	0.200351	-8.66941	4.34362e-18	2.13369e-15	1.66843
C4_03540C_A	5.91611	-1.72962	2.19356	-0.788496	0.430407	1	0.511811
C7_02090C_A	1.63973	-1.72727	4.06739	-0.424662	0.671083	1	0
C3_00540C_A	1.63973	-1.72727	4.06739	-0.424662	0.671083	1	0
C2_07920W_A	1.63973	-1.72727	4.06739	-0.424662	0.671083	1	0
C1_12910W_A	1.94064	-1.72255	3.78529	-0.455066	0.649062	1	0
CR_08600C_A	20.387	-1.72236	1.16498	-1.47844	0.13929	1	2.93744
C2_05350C_A	3.70524	-1.71255	2.62515	-0.652366	0.514165	1	0.668426
CR_00880W_A	13.3266	-1.71055	1.40677	-1.21594	0.224008	1	0.668426
C4_00660W_A	5.46983	-1.70878	2.31643	-0.737677	0.460711	1	0.668426
C4_03330W_A	3.66323	-1.70788	2.88423	-0.592146	0.553753	1	0.668426
C2_06830C_A	18.7226	-1.70691	1.33254	-1.28094	0.200213	1	2.88804
C4_02540W_A	10.4821	-1.69421	1.67252	-1.01297	0.311074	1	0.668426
C1_08390C_A	8.68679	-1.69212	1.80981	-0.934973	0.349802	1	0.668426
C6_04190C_A	6.89152	-1.6912	2.01806	-0.838033	0.402012	1	0.0524941
C4_04180C_A	2.54246	-1.69115	3.36977	-0.50186	0.615766	1	0
C2_02250C_A	6.51793	-1.68759	2.07767	-0.81225	0.416648	1	0.0524941
C4_01380W_A	24.8454	-1.6862	1.0211	-1.65136	0.0986659	0.909629	2.92919
C3_07130W_A	17.8312	-1.67283	1.25673	-1.3311	0.183155	1	0.0274261
C1_11430W_A	16.1279	-1.67231	1.41083	-1.18534	0.235882	1	0.0524941
C1_12680W_A	8.24052	-1.67164	1.85323	-0.902017	0.367048	1	0.511811
C2_07720C_A	45.9672	-1.66625	0.861332	-1.9345	0.0530514	0.650523	2.88804
C6_01340C_A	2.16887	-1.66356	3.61137	-0.460644	0.645054	1	0
C1_06970C_A	11.2968	-1.66237	1.46023	-1.13843	0.25494	1	0.0524941
C2_04220C_A	34.5172	-1.65764	2.35844	-0.702856	0.482146	1	2.93744
C4_02840C_A	5.35515	-1.65634	2.22445	-0.744604	0.456511	1	0.511811
C1_01910W_A	7.11974	-1.65575	1.98624	-0.83361	0.404501	1	0.0524941
CR_08890C_A	7.28554	-1.65346	1.94741	-0.849058	0.395849	1	0.0274261
C1_12080W_A	19.6162	-1.65086	1.2005	-1.37515	0.169086	1	2.88804
C2_04300C_A	1.56705	-1.64866	4.14685	-0.39757	0.690947	1	0
C2_05560W_A	3.89146	-1.64824	2.81194	-0.586158	0.55777	1	0
C5_03670C_A	1.26614	-1.64418	4.54924	-0.361417	0.717787	1	0
CR_04750W_A	1.26614	-1.64418	4.54924	-0.361417	0.717787	1	0
C1_04000C_A	9.14324	-1.63924	1.77085	-0.925678	0.354613	1	0.0813911
C1_12610W_A	10.5967	-1.63661	1.74076	-0.940167	0.347132	1	0.0524941
C2_08840W_A	5.62538	-1.63395	2.27577	-0.717978	0.472771	1	0.511811
C4_02090C_A	8.23027	-1.63219	1.88804	-0.864491	0.387318	1	0.0524941
C2_10060C_A	0.892549	-1.62557	4.81363	-0.337701	0.735588	1	0
C1_03670C_A	18.5976	-1.62334	1.33944	-1.21195	0.22553	1	2.93744
C1_09250W_A	37.2302	-1.62219	0.835333	-1.94196	0.0521414	0.640474	2.93744
C1_04670W_A	9.74506	-1.62163	1.72415	-0.94054	0.346941	1	0.668426
C1_04730C_A	16.1278	-1.6141	1.42159	-1.13542	0.256201	1	0.668426
C2_07270W_A	5.54136	-1.61374	2.43896	-0.66165	0.508196	1	0.668426
C5_05490C_A	17.8095	-1.61264	1.42002	-1.13565	0.256104	1	0.511811
C1_02640C_A	18.5936	-1.61033	1.27785	-1.26018	0.207603	1	2.92919
C2_04690C_A	6.60079	-1.60687	2.06663	-0.777531	0.436846	1	0.668426
C4_05190C_A	6.76658	-1.60583	2.01107	-0.798496	0.424583	1	0.0274261
C1_09570W_A	10.9907	-1.60271	1.66207	-0.964285	0.334903	1	0.668426
C3_00060W_A	2.00307	-1.60227	3.4384	-0.465994	0.64122	1	0
C1_03280W_A	12.1146	-1.59556	1.46166	-1.09161	0.275005	1	0.0524941
C2_05710C_A	40.7663	-1.59412	0.868868	-1.83471	0.0665485	0.937835	1.66843
C5_05270C_A	17.6538	-1.59361	1.48037	-1.0765	0.281706	1	0.511811
C2_06720W_A	7.2026	-1.58385	1.97688	-0.801187	0.423024	1	0.0274261
C1_05650W_A	8.44824	-1.5807	1.95288	-0.809421	0.418273	1	0.0813911
C4_02610C_A	66.2468	-1.57452	0.70969	-2.21861	0.0265135	0.536223	2.01181
C4_05440C_A	19.2158	-1.57452	1.21223	-1.29886	0.193991	1	2.92919
C4_05650W_A	9.12274	-1.57272	1.84588	-0.852013	0.394207	1	0.668426
C4_03750C_A	1.49437	-1.56525	4.2322	-0.369845	0.711498	1	0
C4_03730C_A	1.49437	-1.56525	4.2322	-0.369845	0.711498	1	0.668426
C1_13630W_A	1.49437	-1.56525	4.2322	-0.369845	0.711498	1	0
C5_01710C_A	1.49437	-1.56525	4.2322	-0.369845	0.711498	1	0.668426
C3_05390C_A	1.49437	-1.56525	4.2322	-0.369845	0.711498	1	0
CR_07030C_A	1.49437	-1.56525	4.2322	-0.369845	0.711498	1	0.668426
C5_03580C_A	1.49437	-1.56525	4.2322	-0.369845	0.711498	1	0
CR_07320C_A	6.45542	-1.56267	2.09371	-0.746365	0.455447	1	0.668426
C4_02630C_A	11.6448	-1.56142	1.50362	-1.03844	0.299063	1	0.511811
C1_08190C_A	18.4738	-1.55548	1.18949	-1.30768	0.190981	1	2.88804
C2_09760W_A	4.6775	-1.55507	2.40792	-0.645814	0.5184	1	0.511811
C1_03230C_A	7.43083	-1.55497	1.94775	-0.79834	0.424673	1	0.0813911
C2_00930C_A	12.8166	-1.5454	1.54487	-1.00034	0.317145	1	0.668426
C6_03540W_A	12.3079	-1.54394	1.57442	-0.98064	0.32677	1	0.0524941
C1_08350C_A	16.6416	-1.54246	1.27524	-1.20954	0.226456	1	0.511811
C3_06760W_A	1.19346	-1.54095	4.67159	-0.329856	0.741509	1	0
C7_00530C_A	1.19346	-1.54095	4.67159	-0.329856	0.741509	1	0
C6_03420W_A	5.33465	-1.54092	2.41093	-0.639141	0.522731	1	0.511811
CR_02920C_A	39.2194	-1.54058	0.856901	-1.79786	0.0721999	0.764385	2.88804
C2_09660W_A	5.18928	-1.53868	2.71251	-0.567254	0.570541	1	0.668426
C1_01190C_A	4.64882	-1.5383	2.61352	-0.588592	0.556135	1	0.668426
CR_00040C_A	9.60987	-1.52793	1.73598	-0.880154	0.378776	1	0.0813911
CR_07380C_A	13.4501	-1.52677	1.56205	-0.977414	0.328364	1	0.511811
C3_02990C_A	3.04091	-1.52129	2.90185	-0.524248	0.600106	1	0
C6_02280W_A	11.488	-1.51635	1.61663	-0.937967	0.348261	1	0.668426
C3_05290C_A	42.0658	-1.51554	0.812632	-1.86497	0.0621851	0.877876	2.01181
C7_01560C_A	12.1318	-1.51453	1.58963	-0.952756	0.340714	1	0.0813911
C1_10690W_A	9.53719	-1.51304	1.74182	-0.868654	0.385036	1	0.0524941
C5_00310C_A	1.72259	-1.51263	3.98075	-0.379987	0.703955	1	0
C4_00400W_A	11.8934	-1.50624	1.63362	-0.922025	0.356516	1	0.0524941
C1_10700C_A	27.1796	-1.5056	1.19982	-1.25485	0.209534	1	2.88804
C5_02860C_A	22.0631	-1.50459	1.06419	-1.41383	0.157411	1	1.66843
CR_06930W_A	5.93646	-1.50359	2.20505	-0.681882	0.495314	1	0.0274261
C6_04050W_A	7.19747	-1.50197	1.83645	-0.817865	0.413434	1	0.668426
C1_14590C_A	6.91187	-1.50141	2.0214	-0.742757	0.457629	1	0.511811
C2_02030W_A	31.3708	-1.50085	1.13355	-1.32402	0.185496	1	1.66843
C5_05470W_A	16.7347	-1.49545	1.24457	-1.20158	0.229527	1	0.0813911
C6_03860C_A	1.62948	-1.49498	3.77376	-0.39615	0.691994	1	0.668426
C5_05370C_A	12.5576	-1.49228	1.63196	-0.914406	0.360504	1	0.0524941
C2_05000C_A	4.45235	-1.48913	2.48048	-0.600341	0.548279	1	0
C4_00820W_A	8.8607	-1.48717	1.7682	-0.841065	0.400312	1	0.0274261
CR_01480W_A	5.72866	-1.48525	2.1714	-0.684008	0.49397	1	0.511811
C3_01740C_A	1992.6	-1.48108	0.205277	-7.21502	5.39265e-13	6.30137e-11	2.88804
C2_02310W_A	8.1155	-1.48084	1.87049	-0.791684	0.428545	1	0.668426
C6_02940C_A	10.095	-1.4803	1.56886	-0.943552	0.345398	1	0.0274261
C3_01980C_A	2.25172	-1.47839	3.54413	-0.417138	0.676577	1	0.668426
C6_02650C_A	1.42168	-1.47643	4.3242	-0.341434	0.732777	1	0
CR_05490W_A	1.42168	-1.47643	4.3242	-0.341434	0.732777	1	0.668426
C7_02290W_A	1.42168	-1.47643	4.3242	-0.341434	0.732777	1	0
C2_03470C_A	39.685	-1.47624	0.863128	-1.71033	0.0872046	0.860182	2.93744
C4_01560C_A	10.2945	-1.47379	1.68872	-0.872727	0.382812	1	0.0524941
C3_03650W_A	2.55263	-1.46426	3.35467	-0.436483	0.662486	1	0.668426
C7_00600C_A	8.34373	-1.45953	1.84757	-0.789971	0.429545	1	0.0274261
C2_09950W_A	8.58533	-1.45917	1.6932	-0.861782	0.388807	1	0.0274261
C2_05130W_A	5.7911	-1.4548	2.24863	-0.646975	0.517648	1	0.668426
C1_09240C_A	1.12077	-1.45202	4.80046	-0.302476	0.76229	1	0
C1_00510W_A	1.12077	-1.45202	4.80046	-0.302476	0.76229	1	0.668426
C1_07160C_A	1.12077	-1.45202	4.80046	-0.302476	0.76229	1	0
C2_05750W_A	1.12077	-1.45202	4.80046	-0.302476	0.76229	1	0
C3_07280C_A	7.36832	-1.45026	1.95925	-0.740213	0.459171	1	0.668426
C3_01220W_A	7.36832	-1.45026	1.95925	-0.740213	0.459171	1	0.0274261
CR_07440W_A	52.6755	-1.44121	0.703541	-2.04851	0.0405101	0.757048	1.66843
C1_11110C_A	4.98148	-1.44073	2.3296	-0.618446	0.536282	1	0
C2_07390C_A	27.3134	-1.44043	1.18482	-1.21574	0.224085	1	2.92919
C6_03390W_A	10.4194	-1.43615	1.71718	-0.836342	0.402962	1	0.511811
C5_02510C_A	12.6405	-1.43581	1.40818	-1.01962	0.307907	1	0.511811
C7_00290C_A	12.4951	-1.43196	1.64415	-0.870944	0.383785	1	0.0274261
C5_01470C_A	5.71841	-1.43033	2.274	-0.628992	0.529354	1	0.0524941
CR_05500C_A	10.6783	-1.42889	1.66537	-0.858	0.390892	1	0.0274261
C2_08320C_A	7.89745	-1.4257	1.89594	-0.751975	0.452066	1	0.0274261
C5_01950C_A	4.35808	-1.42193	2.68067	-0.530439	0.595807	1	0.511811
C5_02910C_A	13.5636	-1.42062	1.53266	-0.926898	0.35398	1	0.511811
C1_08840W_A	2.17904	-1.41926	3.59329	-0.394976	0.692861	1	0.511811
C3_06160C_A	2.17904	-1.41926	3.59329	-0.394976	0.692861	1	0.668426
C4_05940W_A	16.0947	-1.41616	1.43927	-0.983946	0.325142	1	0.0524941
C2_07730W_A	157.664	-1.41553	0.521611	-2.71376	0.00665248	0.213153	2.01181
C7_04160W_A	0.747183	-1.4123	4.81535	-0.29329	0.7693	1	0.511811
C3_01440C_A	0.747183	-1.4123	4.81535	-0.29329	0.7693	1	0
C3_03680W_A	43.3429	-1.40816	0.817782	-1.72193	0.0850821	0.845881	2.92919
CR_02760C_A	14.2024	-1.40785	1.3657	-1.03087	0.302604	1	0.668426
C6_02150C_A	5.51061	-1.40556	2.21433	-0.634756	0.525588	1	0
C1_07580C_A	1.87813	-1.40552	3.83599	-0.366403	0.714064	1	0.511811
C5_01200W_A	1.87813	-1.40552	3.83599	-0.366403	0.714064	1	0.511811
C1_11870W_A	91.6785	-1.40341	0.536962	-2.61361	0.00895909	0.202238	2.88804
C5_02780W_A	8.83091	-1.40253	1.92867	-0.727198	0.467104	1	0.0274261
C3_06720W_A	6.76535	-1.40198	2.25823	-0.620831	0.534711	1	0.668426
C7_00310C_A	18.7006	-1.39373	1.39999	-0.995523	0.319482	1	1.66843
C2_01490C_A	17.2095	-1.39253	1.2604	-1.10483	0.269233	1	0.511811
C7_00040C_A	11.405	-1.39034	1.64249	-0.846486	0.397281	1	0.0813911
CR_08830W_A	23.6299	-1.38842	1.03468	-1.34188	0.179635	1	1.66843
C2_07370W_A	5.18813	-1.38655	2.50019	-0.554577	0.579184	1	0
C6_00360C_A	1.349	-1.38144	4.42376	-0.312278	0.754829	1	0
C1_02440C_A	1.349	-1.38144	4.42376	-0.312278	0.754829	1	0
C5_01530C_A	13.6976	-1.37846	1.5191	-0.907418	0.364186	1	0.668426
C2_01370C_A	14.3107	-1.37775	1.52112	-0.90575	0.365068	1	0.668426
C1_08170C_A	24.1693	-1.3734	1.0326	-1.33003	0.183507	1	2.01181
C7_02160W_A	8.38259	-1.37092	1.70552	-0.803814	0.421504	1	0.511811
C5_03210C_A	5.32324	-1.36799	2.2635	-0.60437	0.545597	1	0
C1_10770W_A	7.07759	-1.36726	2.00282	-0.682668	0.494816	1	0.511811
C6_00980C_A	1.04809	-1.36643	4.80499	-0.284377	0.776122	1	0
C5_03700C_A	3.30999	-1.35877	3.00163	-0.452676	0.650782	1	0
C2_10660W_A	20.8621	-1.35779	1.24344	-1.09196	0.27485	1	1.66843
C1_01570C_A	2.40727	-1.35769	3.43772	-0.39494	0.692887	1	0.511811
C5_04160W_A	2.10636	-1.35735	3.64505	-0.372381	0.709609	1	0
CR_03140C_A	6.56888	-1.35637	2.04114	-0.664514	0.506361	1	0.668426
C4_04720W_A	16.9034	-1.35573	1.29255	-1.04888	0.294232	1	0.0524941
C3_06070C_A	12.3486	-1.35366	1.57695	-0.858402	0.39067	1	0.511811
C2_10450W_A	1.57722	-1.35201	4.13374	-0.327068	0.743617	1	0
C1_01790W_A	19.4363	-1.35095	1.32968	-1.016	0.309631	1	2.88804
C1_14120C_A	99.8932	-1.34335	0.596221	-2.2531	0.0242527	0.402984	2.88804
C1_06680W_A	11.4152	-1.33838	1.64469	-0.813763	0.415781	1	0.0524941
CR_03380W_A	4.01625	-1.33587	2.97047	-0.449716	0.652915	1	0
C7_03290C_A	209.582	-1.3342	0.403422	-3.3072	0.000942324	0.0340345	2.88804
C1_04370C_A	1.80545	-1.33238	3.90076	-0.341569	0.732675	1	0
C1_10030W_A	1.80545	-1.33238	3.90076	-0.341569	0.732675	1	0
C1_11730W_A	61.3563	-1.33037	0.673025	-1.9767	0.0480754	0.749151	2.01181
CR_01220W_A	16.588	-1.32986	1.24111	-1.07151	0.283939	1	0.668426
C2_09130C_A	1496.05	-1.32842	0.222657	-5.96623	2.42802e-09	2.06177e-07	2.93744
C3_05400C_A	6.11556	-1.32775	2.39096	-0.555321	0.578675	1	0.0274261
C3_05980C_A	4.14003	-1.32738	2.73579	-0.485191	0.627541	1	0.511811
C1_13480W_A	32.5294	-1.32584	1.02244	-1.29674	0.19472	1	1.66843
C2_04480W_A	18.7107	-1.32557	1.45334	-0.912086	0.361723	1	2.92919
C2_05280C_A	0.373591	-1.32481	4.83821	-0.273823	0.784221	1	0
C1_07280C_A	0.373591	-1.32481	4.83821	-0.273823	0.784221	1	0.668426
C2_05080C_A	0.373591	-1.32481	4.83821	-0.273823	0.784221	1	0
C3_05300C_A	20.7433	-1.32224	1.30179	-1.01571	0.309769	1	2.88804
C3_00520W_A	3.23731	-1.31764	3.0288	-0.435035	0.663537	1	0.668426
C2_02510W_A	12.0067	-1.31606	1.63985	-0.802544	0.422238	1	0.511811
C1_07080W_A	12.5328	-1.31435	1.44295	-0.910873	0.362362	1	0.668426
C2_02090W_A	12.4684	-1.31406	1.3964	-0.941036	0.346686	1	0.0274261
C5_03870C_A	22.0495	-1.31399	1.05581	-1.24453	0.213304	1	1.66843
C1_01090C_A	3.05109	-1.312	2.90687	-0.451346	0.65174	1	0.668426
C3_04190W_A	2.6775	-1.30996	3.47015	-0.377493	0.705807	1	0
C1_07770W_A	8.24939	-1.30826	1.87037	-0.699469	0.484259	1	0.668426
C1_02700C_A	15.7324	-1.30764	1.2459	-1.04956	0.293922	1	0.0524941
C2_03050W_A	17.6001	-1.30689	1.46741	-0.890609	0.373139	1	0.668426
C5_02060W_A	6.85954	-1.3015	2.03962	-0.638111	0.523401	1	0.668426
C2_04990W_A	2.33458	-1.30105	3.48221	-0.373628	0.708681	1	0.668426
C3_03980C_A	2.33458	-1.30105	3.48221	-0.373628	0.708681	1	0
C2_07190C_A	6.55863	-1.29855	2.09116	-0.620969	0.53462	1	0.511811
C6_00370C_A	26.0861	-1.29797	0.983303	-1.32001	0.186833	1	2.88804
C2_04880C_A	10.0662	-1.29687	1.57434	-0.823752	0.41008	1	0.0274261
C1_05210C_A	4.06735	-1.29431	2.75518	-0.469773	0.638517	1	0.511811
C7_01400C_A	9.90948	-1.29345	1.74988	-0.739168	0.459805	1	0.0274261
CR_00760C_A	19.333	-1.29296	1.12701	-1.14725	0.25128	1	2.92919
C1_04350C_A	12.0272	-1.29239	1.60673	-0.804359	0.42119	1	0.0813911
C1_02270C_A	6.01419	-1.28765	2.09979	-0.613227	0.539726	1	0.0813911
C1_09740C_A	0.6745	-1.28746	4.81648	-0.267304	0.789235	1	0
C4_07130W_A	24.2509	-1.28458	1.02997	-1.2472	0.212323	1	2.01181
C1_08330C_A	1982.23	-1.28231	0.195585	-6.55629	5.51611e-11	5.47878e-09	2.88804
C4_05860W_A	6.04992	-1.28042	2.12115	-0.603648	0.546078	1	0.0524941
CR_06920W_A	1.27632	-1.27931	4.53522	-0.282084	0.777879	1	0
C3_03640W_A	1.27632	-1.27931	4.53522	-0.282084	0.777879	1	0.668426
CR_07460C_A	19.6122	-1.27895	1.32885	-0.962455	0.335821	1	2.93744
C4_05850C_A	5.58322	-1.27813	2.36889	-0.53955	0.589508	1	0
CR_09520C_A	13.4744	-1.27511	1.35627	-0.940157	0.347137	1	0.0524941
C5_00540C_A	18.8868	-1.27418	1.14056	-1.11715	0.263931	1	2.01181
C6_00720C_A	0.975408	-1.27365	4.80566	-0.265031	0.790986	1	0.668426
C5_04780W_A	6.02834	-1.27334	2.35824	-0.539951	0.589231	1	0.668426
C3_06650C_A	12.5347	-1.27274	1.58609	-0.802438	0.422299	1	0.0274261
C1_10190W_A	8.74785	-1.27054	1.81461	-0.700174	0.483819	1	0.0274261
C2_00010W_A	3.07152	-1.26954	2.83884	-0.447205	0.654727	1	0.511811
C6_00460C_A	2.86372	-1.26628	3.18898	-0.397078	0.69131	1	0.511811
C2_03390C_A	34.2883	-1.26432	0.935219	-1.3519	0.176407	1	1.66843
C1_05880W_A	8.63316	-1.26407	1.83936	-0.687233	0.491936	1	0.668426
C4_07090C_A	14.9431	-1.26061	1.49631	-0.842477	0.399521	1	0.511811
C2_06280C_A	1.73277	-1.25501	3.96971	-0.316147	0.751891	1	0
C5_01960C_A	12.0897	-1.25183	1.41602	-0.884051	0.376669	1	0.668426
C3_07040C_A	7.63733	-1.24866	1.91424	-0.6523	0.514208	1	0.0274261
C4_00420C_A	61.4486	-1.24792	0.75624	-1.65017	0.0989092	0.909629	2.88804
C2_10090C_A	5.81145	-1.24616	2.27677	-0.547335	0.584149	1	0.0274261
C1_00520W_A	20.1846	-1.24567	1.19995	-1.0381	0.299226	1	2.01181
C2_09020W_A	34.0294	-1.24542	0.864622	-1.44042	0.149747	1	1.66843
C7_01420W_A	9.33436	-1.24492	1.58873	-0.783592	0.43328	1	0.668426
C2_03870W_A	7.24331	-1.24472	1.98549	-0.62691	0.530718	1	0.0274261
C1_07140C_A	25.2529	-1.24224	0.987625	-1.25781	0.208461	1	2.93744
C2_02610C_A	2.2619	-1.24175	3.52877	-0.351893	0.724918	1	0.511811
C2_10810W_A	5.13189	-1.23955	2.18351	-0.567689	0.570246	1	0
C7_01430C_A	43.5748	-1.23717	0.816946	-1.51439	0.129927	0.989544	2.88804
C5_02280C_A	3.09194	-1.23135	3.08621	-0.398984	0.689905	1	0.668426
C1_01070C_A	5.05294	-1.23027	2.52507	-0.487221	0.626102	1	0
C4_02320C_A	29.8307	-1.23	1.07392	-1.14533	0.25207	1	2.88804
C5_04420W_A	8.30157	-1.22913	1.85954	-0.660989	0.50862	1	0.0274261
C1_11990W_A	163.077	-1.22643	0.418636	-2.9296	0.00339401	0.0977556	2.92919
C4_00370W_A	14.8272	-1.2242	1.5368	-0.796585	0.425692	1	0.0524941
C5_05050W_A	724.291	-1.2238	0.244711	-5.001	5.70338e-07	3.59325e-05	2.93744
CR_02720C_A	10.1911	-1.22135	1.6423	-0.74368	0.45707	1	0.0524941
C2_00840W_A	15.4824	-1.21906	1.47322	-0.827481	0.407965	1	0.0813911
C7_00480W_A	6.41211	-1.21792	2.30359	-0.528705	0.59701	1	0.0813911
C5_05200C_A	10.719	-1.21579	1.66815	-0.728821	0.466111	1	0.0813911
C4_01850C_A	5.28116	-1.21154	2.48159	-0.488211	0.625401	1	0
C2_07350W_A	24.2598	-1.2105	1.07986	-1.12097	0.262299	1	2.92919
C1_03740W_A	17.5971	-1.21	1.17429	-1.03041	0.302817	1	0.0813911
C3_05780C_A	13.9665	-1.20991	1.51312	-0.79961	0.423937	1	0.0813911
C7_00230W_A	14.3986	-1.20851	1.36714	-0.88397	0.376712	1	0.511811
C6_02490C_A	12.2861	-1.20524	1.40534	-0.857615	0.391105	1	0.668426
C6_02030C_A	16.3328	-1.20506	1.42433	-0.846057	0.397521	1	0.0813911
C1_01750W_A	10.4551	-1.19546	1.52219	-0.785354	0.432246	1	0.668426
C2_10360C_A	6.79703	-1.19293	2.05729	-0.579854	0.562013	1	0.668426
C6_02750C_A	12.9515	-1.19278	1.48227	-0.804702	0.420992	1	0.668426
C2_07170C_A	4.67934	-1.19252	2.60283	-0.458163	0.646835	1	0.511811
C2_04460W_A	52.799	-1.19248	0.709157	-1.68155	0.092657	1	2.01181
C3_03890W_A	51.0233	-1.19208	0.742589	-1.6053	0.108427	0.925485	2.92919
C5_05130C_A	11.9914	-1.19077	1.59464	-0.746735	0.455223	1	0.511811
CR_03820C_A	4.79403	-1.19035	2.33439	-0.50992	0.610108	1	0.511811
C4_04010W_A	44.4341	-1.18967	0.774299	-1.53644	0.12443	1	2.01181
CR_04850C_A	1.20363	-1.18944	4.65237	-0.255663	0.798211	1	0.668426
C7_03640C_A	1.20363	-1.18944	4.65237	-0.255663	0.798211	1	0.668426
C2_07020C_A	1.20363	-1.18944	4.65237	-0.255663	0.798211	1	0
C1_07660W_A	1.20363	-1.18944	4.65237	-0.255663	0.798211	1	0
C3_03270W_A	1.20363	-1.18944	4.65237	-0.255663	0.798211	1	0.511811
C6_00190W_A	7.41928	-1.18765	1.93918	-0.61245	0.54024	1	0.0274261
C5_00330C_A	22.3815	-1.18709	1.2769	-0.92966	0.352547	1	2.88804
C5_04880C_A	3.01926	-1.186	3.11637	-0.380573	0.70352	1	0
C2_10310C_A	12.898	-1.18563	1.55295	-0.763467	0.445185	1	0.668426
CR_10730C_A	7.8553	-1.18307	1.91042	-0.619275	0.535735	1	0.0813911
C3_04990W_A	9.74361	-1.1828	1.73558	-0.681502	0.495554	1	0.511811
C4_06850C_A	2.18922	-1.17967	3.57785	-0.329714	0.741616	1	0
C1_10020W_A	2.18922	-1.17967	3.57785	-0.329714	0.741616	1	0
CR_00210W_A	11.3118	-1.17694	1.58547	-0.742331	0.457887	1	0.0524941
C7_03580C_A	18.0361	-1.17478	1.27951	-0.918144	0.358543	1	0.511811
C7_00060C_A	11.5386	-1.17399	4.59902	-0.255271	0.798514	1	0.668426
C1_10710C_A	1.66008	-1.17291	4.04332	-0.290086	0.771751	1	0
C2_08055W_A	1.66008	-1.17291	4.04332	-0.290086	0.771751	1	0.511811
C5_05140W_A	8.49918	-1.1716	1.76207	-0.664901	0.506114	1	0.0274261
CR_02940C_A	1.43186	-1.16977	4.3103	-0.271388	0.786093	1	0.668426
C1_00200C_A	1.43186	-1.16977	4.3103	-0.271388	0.786093	1	0.511811
C5_03460C_A	1.43186	-1.16977	4.3103	-0.271388	0.786093	1	0
CR_09730C_A	6.72435	-1.16951	2.07168	-0.564523	0.572398	1	0.668426
C1_08080C_A	6.72435	-1.16951	2.07168	-0.564523	0.572398	1	0.668426
C1_01880C_A	5.4367	-1.16881	2.45349	-0.476388	0.633798	1	0
CR_06380C_A	6.08053	-1.16643	2.11	-0.552811	0.580393	1	0.0813911
C3_03380W_A	27.2864	-1.16535	0.965315	-1.20722	0.227348	1	2.93744
C2_00410C_A	7.78262	-1.16283	1.92	-0.60564	0.544754	1	0.0813911
C5_04190W_A	86.4617	-1.16154	0.563058	-2.06291	0.039121	0.53807	2.93744
C4_02070W_A	25.7564	-1.16058	1.10557	-1.04976	0.293828	1	2.01181
C7_01510W_A	7.66793	-1.16055	1.92433	-0.603092	0.546448	1	0.0524941
C2_04230W_A	34.853	-1.15985	0.842408	-1.37683	0.168564	1	2.93744
C1_06860W_A	3.24749	-1.15907	3.02241	-0.38349	0.701356	1	0
C1_13950C_A	3.24749	-1.15907	3.02241	-0.38349	0.701356	1	0
CR_06660W_A	11.7671	-1.15881	1.4314	-0.809566	0.41819	1	0.668426
C1_03650C_A	5.25048	-1.15576	2.24427	-0.514981	0.606566	1	0
C1_13450W_A	11.4171	-1.15575	1.43466	-0.805592	0.420478	1	0.0274261
C5_04870W_A	23.4995	-1.1533	1.09727	-1.05106	0.293231	1	1.66843
C6_00240C_A	1.88831	-1.15194	3.81851	-0.301673	0.762901	1	0
C3_02980C_A	1.88831	-1.15194	3.81851	-0.301673	0.762901	1	0
C2_07450C_A	1.88831	-1.15194	3.81851	-0.301673	0.762901	1	0.668426
C2_08740W_A	12.2439	-1.14984	1.58723	-0.724436	0.468798	1	0.668426
C1_05530C_A	18.6992	-1.14778	1.14853	-0.999347	0.317626	1	2.93744
C3_01030W_A	28.0468	-1.14731	1.01454	-1.13087	0.25811	1	2.01181
CR_02180W_A	0.601817	-1.14614	4.81787	-0.237892	0.811964	1	0
C1_01200W_A	4.83489	-1.14542	2.56893	-0.445876	0.655687	1	0
CR_05790C_A	19.4853	-1.14368	1.11888	-1.02217	0.3067	1	2.93744
C1_08120W_A	26.4154	-1.14352	1.06042	-1.07837	0.280869	1	2.01181
CR_00600C_A	29.4277	-1.1428	1.00283	-1.13958	0.254459	1	2.01181
CR_09670C_A	53.0466	-1.14229	0.70437	-1.62172	0.104863	0.925485	2.88804
CR_04120C_A	7.70993	-1.14226	1.92986	-0.591889	0.553925	1	0.0274261
C6_03590C_A	13.5195	-1.1388	1.45505	-0.782653	0.433831	1	0.0524941
C1_10400C_A	44.8913	-1.13866	0.787087	-1.44667	0.147988	1	2.88804
CR_03150W_A	36.077	-1.13854	0.874578	-1.30182	0.192977	1	2.01181
C4_06040W_A	6.35076	-1.13586	2.14838	-0.528705	0.59701	1	0.511811
CR_00780C_A	219.461	-1.13344	0.393297	-2.8819	0.00395288	0.165777	1.66843
C3_07760C_A	9.59709	-1.13257	1.99358	-0.568109	0.569961	1	0.0274261
CR_02050C_A	21.614	-1.13189	1.08122	-1.04686	0.295163	1	2.92919
C5_04070C_A	5.23518	-1.12863	2.08383	-0.541615	0.588084	1	0
C5_00460C_A	13.5686	-1.12829	1.44149	-0.782726	0.433788	1	0.668426
CR_06260W_A	9.75379	-1.12652	1.73665	-0.648674	0.516549	1	0.0813911
C1_09870W_A	10.4704	-1.12476	1.51813	-0.740889	0.458761	1	0.0813911
CR_00510C_A	48.1378	-1.12222	0.76778	-1.46165	0.143838	1	2.92919
C5_02620C_A	23.5659	-1.12062	1.05841	-1.05878	0.289701	1	2.93744
C6_00320C_A	14.1181	-1.11967	1.39249	-0.804078	0.421352	1	0.0274261
C1_10870W_A	55.9416	-1.11799	0.738773	-1.5133	0.130203	0.989544	2.92919
C1_01770W_A	3.5904	-1.11696	2.67316	-0.417843	0.676062	1	0
C2_08690C_A	9.33819	-1.11637	1.78892	-0.624048	0.532596	1	0.668426
C1_14040W_A	23.9089	-1.1162	1.04688	-1.06622	0.286325	1	1.66843
CR_10700W_A	3.70394	-1.11535	2.86086	-0.389864	0.696637	1	0.668426
C6_04620C_A	3.70394	-1.11535	2.86086	-0.389864	0.696637	1	0.668426
C2_06520C_A	3.1748	-1.11509	3.05051	-0.365542	0.714707	1	0
C3_01310W_A	2.11653	-1.11453	3.62953	-0.307073	0.758788	1	0.668426
CR_00630W_A	8.39461	-1.1138	1.85491	-0.60046	0.548199	1	0.0813911
C1_02870W_A	5.40603	-1.11229	2.21699	-0.501713	0.615869	1	0.668426
C5_04510W_A	26.2728	-1.10987	0.999794	-1.11009	0.266958	1	2.93744
C6_03530C_A	8.02422	-1.10886	1.74109	-0.636878	0.524204	1	0.668426
C4_04750W_A	13.7904	-1.1084	1.54089	-0.719327	0.47194	1	0.668426
C1_05770C_A	52.1846	-1.10697	0.762019	-1.45268	0.146313	1	2.92919
C7_03720C_A	49.7519	-1.10695	0.727524	-1.52153	0.128126	0.983666	2.92919
C7_00790W_A	13.5406	-1.10503	1.53225	-0.721181	0.470798	1	0.0813911
C5_03320C_A	1.13095	-1.10246	4.77794	-0.23074	0.817517	1	0.511811
C1_02580W_A	1.13095	-1.10246	4.77794	-0.23074	0.817517	1	0.511811
C4_02150C_A	1.13095	-1.10246	4.77794	-0.23074	0.817517	1	0
C7_03990C_A	1.13095	-1.10246	4.77794	-0.23074	0.817517	1	0
C2_00390C_A	14.859	-1.10176	1.27195	-0.866192	0.386385	1	0.0524941
C5_00390C_A	35.329	-1.10105	2.34892	-0.46875	0.639248	1	1.66843
C7_02770W_A	37.9444	-1.09993	0.932522	-1.17952	0.238192	1	2.93744
C3_04790W_A	8.78158	-1.09854	1.64621	-0.667314	0.504572	1	0.511811
C3_05610W_A	20.3809	-1.09766	1.16735	-0.940303	0.347062	1	2.92919
C3_00310C_A	6.5063	-1.09717	2.11992	-0.51755	0.604772	1	0.0274261
C1_13960W_A	17.8271	-1.09635	1.16717	-0.939322	0.347565	1	0.0274261
C1_11370C_A	9.51531	-1.09296	1.78009	-0.61399	0.539222	1	0.668426
C1_07680W_A	32.9703	-1.09249	0.991125	-1.10227	0.270342	1	2.93744
C3_07300W_A	7.79279	-1.09118	1.92257	-0.567564	0.570331	1	0.0813911
C6_01380C_A	8.43156	-1.09075	1.73868	-0.627341	0.530435	1	0.0813911
C3_07770C_A	2.87389	-1.09039	3.18043	-0.342844	0.731716	1	0
CR_07630C_A	26.9065	-1.0903	0.954048	-1.14281	0.253117	1	2.93744
C4_02710C_A	11.9736	-1.08866	1.61481	-0.674174	0.500201	1	0.511811
C4_00940W_A	0.300908	-1.08729	4.8416	-0.224572	0.822312	1	0
C5_02550C_A	4.48998	-1.08611	2.43026	-0.446912	0.654938	1	0
C3_03230C_A	10.8254	-1.08571	1.47087	-0.738139	0.46043	1	0.668426
C6_00860W_A	1.5874	-1.08547	4.12213	-0.263327	0.792298	1	0
C4_01140C_A	2.34476	-1.08469	3.47094	-0.312508	0.754655	1	0
C2_10870W_A	9.19282	-1.08389	1.80002	-0.602152	0.547073	1	0.0813911
C3_04590W_A	48.6783	-1.08007	0.762678	-1.41616	0.156728	1	2.88804
C2_03450W_A	12.8704	-1.07993	1.49257	-0.723541	0.469348	1	0.511811
C3_01770C_A	7.49189	-1.07859	1.96138	-0.549917	0.582377	1	0.0524941
C2_08100W_A	9.53574	-1.07726	1.75512	-0.613779	0.539361	1	0.668426
C3_06390W_A	1.81563	-1.07569	3.88343	-0.276996	0.781783	1	0.511811
C2_10740C_A	10.7814	-1.0738	1.48881	-0.721248	0.470757	1	0.0813911
C1_11660W_A	156.412	-1.07199	0.422683	-2.53617	0.0112072	0.233511	2.92919
C7_03760W_A	3.10212	-1.06968	3.0794	-0.347366	0.728317	1	0
C1_10820C_A	11.5388	-1.0692	1.43378	-0.745723	0.455835	1	0.0274261
C1_02950W_A	1.35918	-1.06851	4.41267	-0.242145	0.808668	1	0
C4_02400C_A	12.036	-1.06787	1.59976	-0.667517	0.504442	1	0.668426
C1_02590C_A	49.9596	-1.06112	0.763362	-1.39006	0.164512	1	1.66843
C2_05200C_A	5.14597	-1.06109	2.50625	-0.423379	0.672019	1	0
CR_02220C_A	0.830042	-1.06038	4.80738	-0.220572	0.825425	1	0.668426
C1_13980C_A	7.87885	-1.05981	1.76017	-0.602104	0.547105	1	0.0274261
C3_04150W_A	7.89928	-1.05662	1.72083	-0.614015	0.539205	1	0.0274261
CR_00350W_A	9.23367	-1.05596	2.02045	-0.522633	0.60123	1	0.0813911
C4_04730W_A	7.94718	-1.05459	2.12938	-0.495257	0.620419	1	0.0524941
C1_02510W_A	8.13577	-1.05217	1.80317	-0.583509	0.559551	1	0.0813911
C1_04240C_A	239.147	-1.05168	0.357948	-2.93809	0.00330242	0.0962661	2.93744
C2_10610W_A	16.8855	-1.05133	1.23153	-0.85368	0.393282	1	0.668426
C1_01840C_A	8.40479	-1.04866	1.85694	-0.564725	0.572261	1	0.0813911
C3_03590W_A	11.248	-1.04796	1.67731	-0.624788	0.53211	1	0.0813911
C2_10110W_A	3.68863	-1.04641	2.69684	-0.388014	0.698006	1	0
CR_06810W_A	139.848	-1.04613	0.448557	-2.33222	0.0196893	0.500691	1.66843
CR_03950W_A	2.04385	-1.04602	3.68406	-0.283933	0.776462	1	0
C3_07410C_A	58.3885	-1.04573	0.759057	-1.37767	0.168304	1	2.01181
C2_08990C_A	28.3292	-1.04328	1.00615	-1.0369	0.299781	1	2.88804
C7_01950W_A	4.84506	-1.04324	2.56632	-0.406512	0.684367	1	0
CR_04540C_A	6.29145	-1.04256	2.13362	-0.488637	0.625099	1	0.0274261
CR_05710C_A	7.11829	-1.04228	2.01731	-0.516668	0.605388	1	0.0274261
C3_01590W_A	7.87565	-1.04182	1.91547	-0.543898	0.586512	1	0.668426
C5_02650C_A	62.868	-1.04174	0.677054	-1.53863	0.123894	0.967891	2.93744
CR_00910W_A	169.777	-1.04003	0.409468	-2.53994	0.011087	0.233511	2.92919
C2_01160W_A	2.80121	-1.03988	3.21538	-0.323408	0.746386	1	0
C7_00950W_A	7.54926	-1.03745	1.78341	-0.581722	0.560754	1	0.0813911
C1_00570C_A	16.2958	-1.03533	1.2575	-0.823325	0.410323	1	0.0524941
CR_10540C_A	4.31593	-1.03424	2.6875	-0.384832	0.700362	1	0
C2_03200W_A	5.20334	-1.03385	2.27619	-0.4542	0.649685	1	0.668426
C3_02940C_A	10.0782	-1.03075	1.52399	-0.67635	0.498819	1	0.0524941
C4_02410C_A	164.819	-1.03003	0.418975	-2.45846	0.0139533	0.368426	2.01181
C4_06770W_A	12.5753	-1.02996	1.57532	-0.653811	0.513233	1	0.511811
CR_00700W_A	5.39578	-1.02743	2.25514	-0.455592	0.648683	1	0
C1_00840C_A	13.3933	-1.02576	1.34234	-0.764157	0.444774	1	0.0274261
C2_00140W_A	10.6246	-1.0254	1.68622	-0.608108	0.543116	1	0.668426
C2_08620W_A	13.1158	-1.02454	1.64607	-0.622416	0.533668	1	0.668426
C1_07490C_A	3.7868	-1.02288	2.83417	-0.360908	0.718168	1	0
CR_07360W_A	20.5689	-1.02275	1.1495	-0.889735	0.373608	1	2.01181
C2_07750W_A	2.27208	-1.02249	3.51758	-0.290679	0.771297	1	0
C1_02960C_A	54.5178	-1.02226	0.683082	-1.49655	0.134511	1	2.88804
C2_00230W_A	13.6215	-1.02119	1.3301	-0.767757	0.442632	1	0.0274261
C2_07880W_A	7.80297	-1.02082	1.92543	-0.530175	0.595991	1	0.668426
C5_01280C_A	11.5171	-1.01832	1.62816	-0.625441	0.531682	1	0.668426
C2_01720C_A	4.43062	-1.01629	2.42139	-0.419716	0.674693	1	0
C2_08270C_A	13.4589	-1.01551	1.37749	-0.737215	0.460992	1	0.511811
C2_06850W_A	1.05827	-1.00948	4.80078	-0.210274	0.833454	1	0
C1_14180W_A	1.05827	-1.00948	4.80078	-0.210274	0.833454	1	0.511811
C4_04820C_A	1.05827	-1.00948	4.80078	-0.210274	0.833454	1	0
C1_00730C_A	26.5359	-1.00769	1.00483	-1.00285	0.315936	1	2.92919
C1_10010C_A	29.3779	-1.00515	0.918837	-1.09394	0.273983	1	1.66843
C4_05050C_A	2.5003	-1.00337	3.37474	-0.297318	0.766224	1	0
C1_14350W_A	15.6021	-1.00305	1.37058	-0.73184	0.464266	1	0.0813911
C1_09490C_A	39.4173	-1.00045	0.800514	-1.24976	0.211386	1	1.66843
C2_00220C_A	20.3591	-0.999144	1.1723	-0.852295	0.394051	1	2.92919
C5_01360W_A	30.6753	-0.998862	1.02826	-0.971412	0.331343	1	2.93744
C7_00710W_A	13.6898	-0.998012	1.58397	-0.630069	0.52865	1	0.0813911
C3_04640W_A	20.6804	-0.995937	1.12839	-0.882616	0.377444	1	2.88804
C4_05900C_A	3.48589	-0.995166	2.93178	-0.33944	0.734278	1	0
CR_10390W_A	1.74294	-0.994778	3.95253	-0.251682	0.801287	1	0
C4_04830W_A	1.74294	-0.994778	3.95253	-0.251682	0.801287	1	0
C4_01260W_A	6.21441	-0.992271	2.33083	-0.425715	0.670316	1	0.0524941
C4_04210C_A	1.51472	-0.991962	4.2068	-0.2358	0.813588	1	0
C2_02540W_A	11.9327	-0.991274	1.40518	-0.705442	0.480535	1	0.0813911
C6_00650C_A	46.0708	-0.991135	0.787198	-1.25907	0.208006	1	2.92919
CR_00080W_A	34.5195	-0.990604	0.9373	-1.05687	0.290571	1	1.66843
C2_08050C_A	40.2708	-0.990227	0.82755	-1.19658	0.231471	1	2.88804
C3_06600C_A	11.1754	-0.988859	1.45474	-0.679751	0.496662	1	0.0813911
C4_02690W_A	15.8342	-0.987529	1.22985	-0.802964	0.421996	1	0.0813911
C3_07140C_A	2.72853	-0.987369	3.251	-0.303712	0.761347	1	0
C2_10420W_A	2.72853	-0.987369	3.251	-0.303712	0.761347	1	0.668426
C3_06950W_A	102.943	-0.985958	0.540968	-1.82258	0.068367	0.909629	2.01181
C2_03350W_A	32.5648	-0.98521	0.89382	-1.10225	0.270355	1	2.88804
C3_01880W_A	9.37506	-0.984765	1.58743	-0.620353	0.535025	1	0.668426
C3_06490W_A	3.71411	-0.98403	2.85654	-0.344484	0.730483	1	0
C1_12990W_A	0.529134	-0.983063	4.81966	-0.203969	0.838378	1	0.668426
C2_04890C_A	0.529134	-0.983063	4.81966	-0.203969	0.838378	1	0
C3_02660W_A	0.529134	-0.983063	4.81966	-0.203969	0.838378	1	0
C2_05160C_A	10.4467	-0.982498	1.56121	-0.629318	0.529141	1	0.511811
C4_06010C_A	5.77954	-0.981167	2.18045	-0.449984	0.652722	1	0.511811
C3_05320W_A	26.1055	-0.980643	1.24006	-0.790802	0.42906	1	2.92919
C2_09800C_A	9.62762	-0.97863	1.99242	-0.491177	0.623302	1	0.0813911
C1_04910C_A	15.3911	-0.978532	1.30612	-0.749193	0.453741	1	0.668426
C7_03690W_A	1.28649	-0.977602	4.51947	-0.216309	0.828747	1	0.511811
C5_04630W_A	1.28649	-0.977602	4.51947	-0.216309	0.828747	1	0
CR_08930C_A	20.706	-0.976314	1.08307	-0.901433	0.367358	1	2.01181
C1_02880C_A	5.81534	-0.974964	2.16605	-0.450112	0.652629	1	0.0813911
C5_04490C_A	3.94234	-0.974083	2.78758	-0.349436	0.726762	1	0
C1_02980W_A	2.95675	-0.973938	3.14121	-0.310052	0.756521	1	0.511811
C1_12390C_A	66.6321	-0.973683	0.642777	-1.51481	0.129821	0.989544	2.88804
C3_02350W_A	20.9916	-0.972555	1.09531	-0.887925	0.374581	1	2.88804
C4_00470C_A	19.049	-0.971689	1.18813	-0.817827	0.413456	1	2.93744
C2_10830W_A	5.79997	-0.971328	2.15435	-0.450868	0.652085	1	0.668426
C3_04020C_A	9.32786	-0.969154	1.77618	-0.545639	0.585314	1	0.668426
C7_03110W_A	62.7862	-0.968013	0.667973	-1.44918	0.147287	1	2.93744
C4_02440C_A	120.849	-0.967922	0.482736	-2.00507	0.0449551	0.590922	2.92919
C4_00350W_A	8.34228	-0.964699	1.86777	-0.516497	0.605507	1	0.0813911
C7_02950C_A	6.36996	-0.962852	2.3093	-0.416946	0.676718	1	0.0524941
C5_04110W_A	38.848	-0.962686	0.799726	-1.20377	0.228679	1	2.93744
C1_03680W_A	99.8721	-0.961775	0.556474	-1.72834	0.0839277	0.963846	2.01181
C3_03150W_A	11.2263	-0.961688	1.64621	-0.584181	0.559098	1	0.0813911
C1_02900C_A	16.3327	-0.961216	1.24841	-0.769955	0.441327	1	0.668426
C1_00410C_A	52.4473	-0.96024	0.801645	-1.19784	0.23098	1	2.92919
CR_04420C_A	20.9515	-0.960051	1.08766	-0.882678	0.37741	1	2.01181
C4_01150W_A	9.8162	-0.957276	1.56625	-0.611191	0.541073	1	0.668426
C6_00080C_A	29.1555	-0.956108	0.974433	-0.981194	0.326497	1	2.93744
C5_00740W_A	7.82461	-0.956006	2.03246	-0.47037	0.638091	1	0.0524941
C3_07750W_A	3.4132	-0.952612	2.9573	-0.322123	0.74736	1	0
C5_03480C_A	9.25403	-0.950734	2.01958	-0.470757	0.637814	1	0.0524941
C5_03640W_A	2.42762	-0.943848	3.41709	-0.276214	0.782384	1	0.668426
C4_02780W_A	25.3482	-0.942504	1.01524	-0.928354	0.353224	1	2.01181
C4_04250W_A	11.9142	-0.94239	1.40455	-0.670955	0.502249	1	0.0813911
CR_05380C_A	119.741	-0.942222	0.509409	-1.84964	0.0643658	0.727215	2.93744
C3_07730W_A	36.6473	-0.94127	0.834502	-1.12794	0.259344	1	2.92919
C2_08870C_A	68.3224	-0.941156	0.68252	-1.37894	0.167913	1	2.92919
CR_10030W_A	17.4133	-0.940855	1.19599	-0.786674	0.431473	1	0.511811
C7_01920W_A	25.4955	-0.940621	1.04154	-0.903109	0.366468	1	2.93744
CR_10580W_A	13.7368	-0.939164	1.52952	-0.614028	0.539197	1	0.0524941
CR_10590W_A	8.72605	-0.938537	1.83124	-0.512515	0.60829	1	0.0524941
C5_02350C_A	8.72605	-0.938537	1.83124	-0.512515	0.60829	1	0.668426
C2_06170C_A	8.72605	-0.938537	1.83124	-0.512515	0.60829	1	0.668426
C7_02660C_A	0.757359	-0.935546	4.80851	-0.19456	0.845737	1	0.668426
C2_04520C_A	0.757359	-0.935546	4.80851	-0.19456	0.845737	1	0.668426
C6_02910W_A	0.757359	-0.935546	4.80851	-0.19456	0.845737	1	0
C4_06710W_A	0.757359	-0.935546	4.80851	-0.19456	0.845737	1	0
CR_00920W_A	0.757359	-0.935546	4.80851	-0.19456	0.845737	1	0.511811
C2_07180W_A	0.757359	-0.935546	4.80851	-0.19456	0.845737	1	0.668426
C6_02180W_A	21.6926	-0.934969	1.21912	-0.76692	0.443129	1	2.01181
CR_02850C_A	6.5255	-0.934942	2.28861	-0.40852	0.682892	1	0.0274261
C3_06590W_A	119.608	-0.934748	0.507059	-1.84347	0.0652606	0.737576	2.88804
C3_07110W_A	36.1409	-0.933138	0.897144	-1.04012	0.298284	1	2.01181
C1_08420W_A	27.341	-0.928505	0.946051	-0.981453	0.326369	1	2.93744
C2_03760C_A	59.8598	-0.928339	0.658766	-1.40921	0.158773	1	2.92919
CR_03180W_A	10.3995	-0.92733	1.49872	-0.618748	0.536082	1	0.0813911
C3_02220W_A	15.7909	-0.926172	1.46093	-0.63396	0.526107	1	0.0813911
CR_08120C_A	59.6149	-0.926072	0.705379	-1.31287	0.189226	1	2.93744
C7_02790C_A	19.4144	-0.925234	1.15475	-0.801241	0.422992	1	2.93744
C4_07140W_A	6.52985	-0.923704	2.04758	-0.45112	0.651903	1	0.668426
C2_00170C_A	2.88407	-0.92336	3.17381	-0.290932	0.771104	1	0
C1_10620W_A	19.496	-0.922814	1.12421	-0.820857	0.411728	1	2.92919
CR_09950C_A	22.0395	-0.921063	1.15188	-0.799615	0.423934	1	2.93744
C2_06210C_A	49.2441	-0.920004	0.768051	-1.19784	0.230979	1	1.66843
C2_05030C_A	27.3716	-0.917387	0.995661	-0.921385	0.35685	1	2.92919
C3_01790C_A	15.4146	-0.916118	1.3251	-0.691357	0.489341	1	0.0524941
C2_04290W_A	38.0363	-0.91348	0.830449	-1.09998	0.271339	1	2.88804
C6_04180W_A	14.5107	-0.911285	1.32515	-0.687686	0.49165	1	0.511811
C1_02520W_A	16.2906	-0.911203	1.22663	-0.742854	0.45757	1	0.511811
C4_01730C_A	12.1494	-0.910415	1.59927	-0.569268	0.569174	1	0.0813911
C4_07190W_A	47.3213	-0.910046	0.775865	-1.17294	0.240818	1	2.93744
C2_10580W_A	1.67026	-0.908596	4.02628	-0.225666	0.821461	1	0
C2_07430C_A	1.67026	-0.908596	4.02628	-0.225666	0.821461	1	0.511811
C3_03210W_A	0.985584	-0.908075	4.80157	-0.18912	0.849999	1	0.668426
C7_02190W_A	0.985584	-0.908075	4.80157	-0.18912	0.849999	1	0
C1_00470C_A	5.23901	-0.904429	2.48853	-0.363439	0.716277	1	0
C6_01930W_A	20.8754	-0.904283	1.32741	-0.681241	0.495719	1	1.66843
CR_04840C_A	25.767	-0.903788	1.00861	-0.896073	0.370214	1	2.92919
C7_00350C_A	34.2605	-0.903412	0.868611	-1.04007	0.29831	1	2.93744
C7_01030C_A	9.11302	-0.902938	1.60789	-0.561568	0.57441	1	0.0813911
C4_02870C_A	15.9209	-0.902831	1.28335	-0.703497	0.481746	1	0.0274261
C4_05110C_A	26.8106	-0.902783	0.996656	-0.905813	0.365035	1	2.92919
C3_07120W_A	3.56875	-0.90258	2.90332	-0.310879	0.755893	1	0
C6_00400C_A	3.56875	-0.90258	2.90332	-0.310879	0.755893	1	0.511811
C4_06190C_A	9.58989	-0.901734	1.5533	-0.580529	0.561558	1	0.668426
C3_01950C_A	38.5061	-0.900948	0.821097	-1.09725	0.272533	1	2.92919
C1_09010W_A	1.89849	-0.89739	3.80275	-0.235984	0.813445	1	0
CR_07750C_A	3.79697	-0.897296	2.83031	-0.317031	0.75122	1	0
C1_11030W_A	5.69546	-0.89722	2.4095	-0.372367	0.70962	1	0.668426
C4_06890W_A	26.8852	-0.896358	1.02707	-0.872736	0.382807	1	1.66843
C2_10440C_A	18.0844	-0.895238	1.39582	-0.64137	0.521282	1	0.0274261
C3_01320C_A	7.69967	-0.894179	1.86404	-0.4797	0.63144	1	0.0274261
CR_09050C_A	3.92703	-0.892615	2.5816	-0.34576	0.729523	1	0.668426
C1_13810W_A	27.6107	-0.891664	1.03964	-0.857663	0.391079	1	2.01181
C1_00270W_A	45.9533	-0.891616	0.859763	-1.03705	0.299713	1	2.88804
C2_10700C_A	18.2648	-0.891463	1.25444	-0.710646	0.477304	1	0.511811
CR_09760W_A	1.44204	-0.891439	4.30132	-0.207248	0.835816	1	0
C2_07630C_A	1.44204	-0.891439	4.30132	-0.207248	0.835816	1	0
C6_01750C_A	1.21381	-0.890959	4.63283	-0.192314	0.847496	1	0.511811
C3_05870C_A	10.1783	-0.89009	1.7146	-0.519124	0.603675	1	0.511811
C6_03270C_A	27.5577	-0.889012	0.988977	-0.898921	0.368695	1	2.92919
C4_07080C_A	91.2275	-0.888228	0.561846	-1.58091	0.113899	1	2.01181
C6_01720C_A	98.5032	-0.887148	0.52879	-1.67769	0.0934069	0.892406	2.92919
C3_03670W_A	6.60836	-0.885802	2.27801	-0.388849	0.697388	1	0.0524941
C1_06510C_A	4.48165	-0.884696	2.64663	-0.334273	0.738174	1	0
C2_09430W_A	80.1591	-0.881764	0.651894	-1.35262	0.176177	1	2.93744
C5_03560W_A	2.35494	-0.881548	3.46148	-0.254674	0.798975	1	0
CR_03620C_A	21.6176	-0.880942	1.05982	-0.831222	0.405848	1	2.88804
C2_06010W_A	32.4856	-0.877437	0.93776	-0.935673	0.349442	1	2.92919
CR_10410C_A	2.58316	-0.875778	3.32688	-0.263243	0.792364	1	0.668426
C5_03820C_A	45.7186	-0.872613	0.834595	-1.04555	0.295768	1	2.88804
C4_05140C_A	86.9663	-0.872002	0.581429	-1.49976	0.133677	0.999294	2.92919
C1_11900C_A	2.81139	-0.87079	3.20858	-0.271394	0.786088	1	0
C3_07350W_A	24.4212	-0.869851	1.08504	-0.801675	0.422741	1	1.66843
C7_03960C_A	12.6837	-0.868748	1.40512	-0.618273	0.536395	1	0.668426
C1_06910C_A	12.8443	-0.867651	1.5685	-0.553171	0.580146	1	0.0524941
CR_04930W_A	8.77708	-0.867642	1.83333	-0.473259	0.636028	1	0.0813911
C1_04170C_A	125.665	-0.867317	0.527609	-1.64386	0.100205	0.909629	2.92919
C1_06400C_A	19.5164	-0.8672	1.12461	-0.77111	0.440642	1	2.92919
C1_13790C_A	10.8948	-0.866307	1.47016	-0.58926	0.555687	1	0.0274261
C1_01450W_A	24.3409	-0.865769	1.03272	-0.838338	0.401841	1	1.66843
C1_07400C_A	16.0164	-0.864769	1.34378	-0.643537	0.519876	1	0.0813911
C2_08790W_A	8.93896	-0.864307	1.62868	-0.530681	0.59564	1	0.0524941
C2_01990C_A	57.9688	-0.859965	0.684852	-1.2557	0.209226	1	2.88804
C4_02100C_A	8.53989	-0.859732	1.71119	-0.502417	0.615374	1	0.511811
C3_01300C_A	11.3308	-0.859416	1.45894	-0.589069	0.555815	1	0.511811
C2_00830C_A	24.0515	-0.858793	1.00985	-0.85042	0.395092	1	2.88804
C2_05700W_A	144.538	-0.858169	0.436017	-1.9682	0.0490449	0.612897	2.93744
C2_09680W_A	3.72429	-0.857226	2.85264	-0.300502	0.763794	1	0
C3_04770C_A	9.65233	-0.856114	1.55775	-0.549585	0.582604	1	0.0813911
CR_03020C_A	13.1075	-0.854698	1.37045	-0.623663	0.532849	1	0.0274261
C6_03320W_A	76.1295	-0.853232	0.622448	-1.37077	0.170448	1	2.88804
C5_02020C_A	12.2233	-0.853064	1.42871	-0.597086	0.55045	1	0.511811
C1_11940C_A	16.8197	-0.85225	1.23162	-0.691976	0.488952	1	0.511811
CR_08090W_A	108.155	-0.851078	0.534141	-1.59336	0.11108	1	1.66843
CR_05680C_A	6.06706	-0.850696	1.94894	-0.436491	0.662481	1	0.0274261
C7_01670W_A	10.3657	-0.850342	1.51122	-0.562686	0.573649	1	0.0274261
C6_00330C_A	23.3923	-0.848994	1.02554	-0.827855	0.407753	1	2.01181
C5_03900W_A	452.625	-0.848841	0.288601	-2.94123	0.00326916	0.147911	1.66843
C2_05870W_A	7.52562	-0.843491	1.81431	-0.464909	0.641996	1	0.0524941
C3_03910W_A	98.0605	-0.841293	0.534937	-1.5727	0.115789	1	1.66843
C7_04240C_A	11.1013	-0.840669	1.65793	-0.507059	0.612114	1	0.0524941
C1_00020C_A	7.44973	-0.839445	1.98602	-0.422677	0.672531	1	0.511811
C4_03140C_A	7.5543	-0.837461	1.88857	-0.443436	0.65745	1	0.0524941
C4_03940C_A	312.78	-0.837152	0.331952	-2.52191	0.011672	0.23996	2.93744
C3_01600W_A	20.3986	-0.837023	1.11091	-0.753459	0.451174	1	2.88804
CR_00440C_A	71.1918	-0.836292	0.604663	-1.38307	0.166643	1	2.93744
C2_07260C_A	26.2948	-0.834461	0.968876	-0.861268	0.389091	1	2.93744
C2_06810C_A	34.9132	-0.833679	0.857787	-0.971895	0.331103	1	1.66843
C7_03680W_A	14.2047	-0.832768	1.30384	-0.638706	0.523014	1	0.668426
C3_04270C_A	8.74525	-0.832647	2.06004	-0.40419	0.686073	1	0.0524941
C1_03020C_A	69.4114	-0.831626	0.68949	-1.20615	0.22776	1	1.66843
C2_07230C_A	10.3236	-0.831042	1.72878	-0.48071	0.630723	1	0.0813911
C2_03770C_A	9.65815	-0.830901	1.99136	-0.417254	0.676493	1	0.0274261
C3_07940W_A	10.7495	-0.83058	1.47993	-0.56123	0.57464	1	0.0813911
C2_05780C_A	18.7168	-0.829985	1.38063	-0.601165	0.54773	1	2.92919
C7_02150C_A	39.7912	-0.829844	0.795261	-1.04349	0.296723	1	2.01181
C4_06110C_A	43.3512	-0.829783	0.86543	-0.958809	0.337655	1	2.01181
C7_02370W_A	11.6624	-0.829295	1.41685	-0.585308	0.558341	1	0.668426
C1_08070W_A	104.837	-0.826182	0.526079	-1.57045	0.11631	0.939209	2.88804
C2_04950C_A	21.8049	-0.825476	1.06617	-0.774246	0.438785	1	2.01181
C7_03560W_A	9.87421	-0.825249	1.6157	-0.510768	0.609514	1	0.668426
C6_00920W_A	5.89301	-0.825009	2.14296	-0.384986	0.700248	1	0.0274261
C2_03140C_A	21.9196	-0.820719	1.11314	-0.737302	0.460939	1	2.01181
C2_04150C_A	7.27773	-0.820605	1.97266	-0.415988	0.677419	1	0.511811
C7_02910W_A	506.193	-0.820364	0.267983	-3.06126	0.00220409	0.105587	1.66843
C4_02160C_A	17.1396	-0.820362	1.41912	-0.578079	0.563211	1	0.511811
CR_03090C_A	21.3739	-0.820029	1.09944	-0.745858	0.455753	1	2.01181
C6_02770W_A	17.1881	-0.819153	1.2186	-0.672208	0.501451	1	0.511811
C3_05440C_A	1.59758	-0.816426	4.10526	-0.198873	0.842362	1	0.511811
C2_02780C_A	2.05403	-0.816258	3.67255	-0.222259	0.824112	1	0
CR_06850C_A	2.05403	-0.816258	3.67255	-0.222259	0.824112	1	0
C3_01570W_A	2.7387	-0.816065	3.24416	-0.251549	0.80139	1	0
C7_03130C_A	2.7387	-0.816065	3.24416	-0.251549	0.80139	1	0.511811
C1_07910C_A	2.7387	-0.816065	3.24416	-0.251549	0.80139	1	0
C1_12010C_A	19.0803	-0.811937	1.13546	-0.715071	0.474565	1	2.88804
C1_01270W_A	22.9307	-0.810513	1.03953	-0.779692	0.435572	1	1.66843
CR_08250C_A	92.5042	-0.810063	0.561105	-1.44369	0.148825	1	2.88804
C2_10600W_A	9.42602	-0.809711	1.57709	-0.513422	0.607656	1	0.511811
C4_03050C_A	49.7911	-0.809046	0.722301	-1.1201	0.262673	1	1.66843
C6_03200W_A	7.70984	-0.808727	1.85064	-0.436998	0.662113	1	0.511811
C2_02740C_A	15.6683	-0.808569	1.34061	-0.603134	0.54642	1	0.0524941
C2_08560W_A	17.0926	-0.80848	1.25652	-0.643426	0.519948	1	0.0813911
C4_02990C_A	13.8311	-0.805344	1.32429	-0.60813	0.543101	1	0.668426
CR_06440C_A	32.7201	-0.804357	0.87845	-0.915655	0.359848	1	2.88804
C1_10220C_A	7.43833	-0.803978	1.99654	-0.402686	0.68718	1	0.0274261
C5_01220W_A	12.4012	-0.803215	1.38028	-0.581921	0.56062	1	0.511811
C5_02660C_A	12.4809	-0.801698	1.58724	-0.505089	0.613496	1	0.0274261
CR_08540C_A	14.0275	-0.800847	1.29854	-0.61673	0.537413	1	0.511811
CR_06150C_A	45.7007	-0.800713	0.775218	-1.03289	0.301656	1	2.92919
C7_01470C_A	23.6868	-0.799534	1.04537	-0.764836	0.44437	1	2.88804
CR_00480W_A	1.36935	-0.79946	4.39956	-0.181714	0.855807	1	0
C2_06950C_A	1.36935	-0.79946	4.39956	-0.181714	0.855807	1	0
C3_02420C_A	1.14113	-0.797448	4.7572	-0.16763	0.866875	1	0.511811
C1_11620W_A	0.912901	-0.796205	4.80251	-0.16579	0.868323	1	0
C6_03910C_A	0.912901	-0.796205	4.80251	-0.16579	0.868323	1	0
C5_02590C_A	0.912901	-0.796205	4.80251	-0.16579	0.868323	1	0
C5_05180W_A	0.912901	-0.796205	4.80251	-0.16579	0.868323	1	0
C2_09920W_A	0.912901	-0.796205	4.80251	-0.16579	0.868323	1	0.668426
C1_10410W_A	0.912901	-0.796205	4.80251	-0.16579	0.868323	1	0
C2_01230W_A	0.912901	-0.796205	4.80251	-0.16579	0.868323	1	0
CR_01600C_A	0.912901	-0.796205	4.80251	-0.16579	0.868323	1	0
CR_06300C_A	0.912901	-0.796205	4.80251	-0.16579	0.868323	1	0
C2_08750W_A	0.912901	-0.796205	4.80251	-0.16579	0.868323	1	0
C2_05060C_A	0.912901	-0.796205	4.80251	-0.16579	0.868323	1	0
C1_05860W_A	0.912901	-0.796205	4.80251	-0.16579	0.868323	1	0
C1_04650W_A	0.912901	-0.796205	4.80251	-0.16579	0.868323	1	0.511811
C1_04020C_A	0.912901	-0.796205	4.80251	-0.16579	0.868323	1	0
C7_00910C_A	0.912901	-0.796205	4.80251	-0.16579	0.868323	1	0
C3_05540C_A	0.684676	-0.794217	4.80991	-0.165121	0.868849	1	0
C3_00210C_A	0.684676	-0.794217	4.80991	-0.165121	0.868849	1	0
C4_00740W_A	0.684676	-0.794217	4.80991	-0.165121	0.868849	1	0
C4_05540W_A	22.2193	-0.79334	1.04573	-0.758648	0.448063	1	2.93744
C5_02640W_A	12.1207	-0.792466	1.40277	-0.564928	0.572123	1	0.0524941
C3_02680C_A	14.4226	-0.791454	1.32462	-0.597497	0.550176	1	0.511811
C1_00150C_A	19.8069	-0.791218	1.12867	-0.701017	0.483293	1	1.66843
C1_10520W_A	0.456451	-0.789943	4.82205	-0.163819	0.869874	1	0.668426
C2_03110W_A	0.456451	-0.789943	4.82205	-0.163819	0.869874	1	0.668426
C1_13370W_A	0.456451	-0.789943	4.82205	-0.163819	0.869874	1	0.668426
C6_01060C_A	0.456451	-0.789943	4.82205	-0.163819	0.869874	1	0
C3_05600W_A	0.456451	-0.789943	4.82205	-0.163819	0.869874	1	0.511811
C6_01120C_A	0.456451	-0.789943	4.82205	-0.163819	0.869874	1	0
C5_02120C_A	5.86118	-0.789132	2.38344	-0.331089	0.740577	1	0.0274261
C1_10570C_A	14.4112	-0.788877	1.28359	-0.614585	0.538829	1	0.511811
C1_11200W_A	97.2758	-0.787209	0.558275	-1.41007	0.158518	1	2.92919
C3_06920W_A	35.6213	-0.786912	0.860611	-0.914364	0.360526	1	2.88804
C3_04560W_A	4.94827	-0.784506	2.54473	-0.308286	0.757864	1	0.511811
C6_03160C_A	9.66832	-0.78281	1.99102	-0.393171	0.694193	1	0.0813911
C4_06210C_A	11.6725	-0.780447	1.41525	-0.551456	0.581321	1	0.0274261
C3_04080W_A	17.6057	-0.780364	1.25289	-0.622852	0.533382	1	0.0274261
C1_11270W_A	67.2017	-0.779884	0.647692	-1.2041	0.228552	1	2.01181
C1_02040C_A	14.3704	-0.77962	1.29682	-0.601179	0.547721	1	0.668426
CR_06560C_A	20.3871	-0.778867	1.10845	-0.702666	0.482264	1	1.66843
CR_00220W_A	4.03537	-0.77783	2.76058	-0.281763	0.778125	1	0.668426
CR_06010W_A	4.03537	-0.77783	2.76058	-0.281763	0.778125	1	0
C3_03100C_A	4.03537	-0.77783	2.76058	-0.281763	0.778125	1	0.668426
C2_02100W_A	67.4432	-0.777777	0.646639	-1.2028	0.229054	1	2.92919
C5_01860W_A	0.228225	-0.776935	4.84691	-0.160295	0.872649	1	0
C1_02140C_A	0.228225	-0.776935	4.84691	-0.160295	0.872649	1	0.668426
CR_08260C_A	0.228225	-0.776935	4.84691	-0.160295	0.872649	1	0
C2_06600W_A	52.3231	-0.776677	0.708188	-1.09671	0.272768	1	2.01181
C2_02200W_A	56.9575	-0.776595	0.825287	-0.941	0.346705	1	2.88804
C4_05320W_A	101.399	-0.776253	0.528332	-1.46925	0.141764	1	2.88804
C2_05270W_A	3.80715	-0.77569	2.8268	-0.274406	0.783773	1	0
C6_04140C_A	14.1103	-0.775389	1.29506	-0.598729	0.549353	1	0.0813911
C4_00100C_A	14.5451	-0.774861	1.50523	-0.514779	0.606708	1	0.0813911
CR_08610W_A	11.6304	-0.77407	1.64056	-0.471834	0.637045	1	0.668426
C4_03270W_A	3.57892	-0.773222	2.89936	-0.266687	0.78971	1	0.668426
CR_03960C_A	3.57892	-0.773222	2.89936	-0.266687	0.78971	1	0
C1_02970W_A	112.197	-0.77171	0.507786	-1.51975	0.128573	0.983666	2.92919
C7_03600W_A	18.1049	-0.771256	1.16064	-0.664511	0.506363	1	0.668426
C6_04530C_A	9.84673	-0.771148	1.55468	-0.496018	0.619882	1	0.0813911
CR_05840W_A	9.84673	-0.771148	1.55468	-0.496018	0.619882	1	0.0813911
C5_02970W_A	40.6109	-0.771127	0.820828	-0.939451	0.347499	1	2.93744
C7_00860W_A	61.9694	-0.770854	0.694394	-1.11011	0.266951	1	2.92919
C2_07420W_A	10.9457	-0.769167	1.68608	-0.456187	0.648256	1	0.511811
C5_04560C_A	52.8675	-0.768534	0.691591	-1.11125	0.266459	1	2.01181
C7_02220C_A	3.12247	-0.767113	3.06891	-0.249962	0.802616	1	0
C5_00070W_A	21.1751	-0.76634	1.10433	-0.693938	0.487721	1	2.93744
C2_04260W_A	4.39366	-0.764115	2.43622	-0.313648	0.753788	1	0.668426
C6_04060W_A	2.89425	-0.763383	3.168	-0.240967	0.809581	1	0.668426
C2_08010W_A	205.536	-0.761716	0.387393	-1.96626	0.0492686	0.612897	2.93744
C2_08160C_A	28.3608	-0.761604	0.946871	-0.804337	0.421202	1	2.88804
C1_00230C_A	12.9947	-0.759252	1.38196	-0.549403	0.582729	1	0.668426
C6_03650C_A	11.0133	-0.759095	1.47858	-0.513393	0.607676	1	0.511811
C6_01220C_A	22.9306	-0.758381	1.05776	-0.716971	0.473392	1	2.88804
C1_11300C_A	7.02388	-0.757162	2.00065	-0.378457	0.705091	1	0.0524941
C1_03710C_A	26.3968	-0.756692	0.967662	-0.781979	0.434227	1	2.88804
C5_03930C_A	11.8811	-0.755908	1.62926	-0.463958	0.642678	1	0.0274261
C7_02460C_A	10.5569	-0.755165	1.50664	-0.501224	0.616213	1	0.0813911
C7_03280C_A	36.8752	-0.753999	0.83801	-0.89975	0.368253	1	1.66843
C3_00100W_A	2.4378	-0.75382	3.40906	-0.221123	0.824997	1	0.668426
C3_04300C_A	21.0615	-0.753698	1.09365	-0.689158	0.490724	1	1.66843
CR_02770C_A	4.87559	-0.752835	2.5596	-0.294122	0.768665	1	0
C4_06940C_A	4.87559	-0.752835	2.5596	-0.294122	0.768665	1	0
C2_09060C_A	111.406	-0.752526	0.488357	-1.54093	0.123333	1	1.66843
CR_07570W_A	6.58786	-0.751979	2.049	-0.366997	0.713621	1	0.511811
C1_13930W_A	39.7745	-0.751915	0.812395	-0.925553	0.354678	1	2.88804
C1_14060W_A	27.2872	-0.751058	1.02129	-0.735405	0.462093	1	2.88804
C1_05660C_A	79.7694	-0.750028	0.638399	-1.17486	0.240052	1	2.92919
C6_02470W_A	9.86587	-0.749921	1.76047	-0.425977	0.670124	1	0.0274261
C3_02830W_A	23.7358	-0.748037	1.02738	-0.728103	0.466551	1	1.66843
C1_08910C_A	2.20957	-0.747502	3.55691	-0.210155	0.833547	1	0
CR_07130C_A	2.20957	-0.747502	3.55691	-0.210155	0.833547	1	0
C1_09270W_A	2.20957	-0.747502	3.55691	-0.210155	0.833547	1	0
C2_07550W_A	9.40942	-0.745556	1.79018	-0.416469	0.677067	1	0.0524941
CR_00360C_A	7.38722	-0.745045	2.00407	-0.371767	0.710066	1	0.0813911
C1_04260W_A	237.16	-0.74465	0.426383	-1.74643	0.0807359	1	1.66843
C2_05880W_A	1.83406	-0.744205	3.4549	-0.215406	0.829451	1	0
CR_07720C_A	9.08937	-0.743408	1.63351	-0.455099	0.649038	1	0.0274261
C2_08000C_A	26.6874	-0.742242	0.958541	-0.774345	0.438727	1	2.01181
C6_01150W_A	10.7061	-0.742042	1.71187	-0.43347	0.664674	1	0.668426
C3_03880C_A	24.2324	-0.740539	1.02374	-0.723363	0.469457	1	2.92919
C4_02750W_A	1.98135	-0.739764	3.73013	-0.198321	0.842794	1	0
C1_12600C_A	38.3351	-0.738254	0.83358	-0.885643	0.37581	1	2.93744
C2_03160C_A	455.034	-0.738059	0.279443	-2.64118	0.00826181	0.185469	2.93744
C1_03960C_A	15.3955	-0.736948	1.4786	-0.49841	0.618195	1	0.0524941
C4_05680W_A	17.9818	-0.735699	1.20338	-0.611359	0.540962	1	0.0813911
C4_01700C_A	122.352	-0.735284	0.4878	-1.50735	0.131721	1	1.66843
CR_07830C_A	45.0617	-0.733552	0.828448	-0.885454	0.375912	1	2.92919
C4_00680W_A	18.3197	-0.731175	1.14681	-0.637572	0.523752	1	0.0524941
CR_03550W_A	1.75312	-0.730031	3.93664	-0.185445	0.85288	1	0
C1_05980W_A	9.29589	-0.729469	1.7904	-0.407434	0.683689	1	0.0813911
C1_00290W_A	106.409	-0.729154	0.544311	-1.33959	0.180378	1	1.66843
C2_05300C_A	3.50624	-0.729099	2.92392	-0.249357	0.803085	1	0.511811
C3_03900C_A	121.1	-0.728262	0.472917	-1.53994	0.123576	0.976603	2.88804
C4_02740W_A	105.846	-0.728005	0.508483	-1.43172	0.152224	1	2.92919
C1_02000W_A	8.67883	-0.724373	1.63561	-0.442876	0.657856	1	0.668426
C7_00080C_A	11.0511	-0.724311	1.6706	-0.433564	0.664605	1	0.0813911
C3_02920W_A	27.0877	-0.724135	0.953264	-0.759638	0.447471	1	1.66843
C1_04680W_A	345.87	-0.723566	0.317077	-2.28199	0.0224902	0.38303	2.92919
CR_06690C_A	8.30915	-0.722663	2.09785	-0.344478	0.730486	1	0.668426
CR_05720W_A	70.5513	-0.720551	0.629913	-1.14389	0.25267	1	2.01181
C2_09500W_A	1.52489	-0.7175	4.19335	-0.171104	0.864142	1	0.668426
CR_06800C_A	132.577	-0.71707	0.468226	-1.53146	0.125655	0.976603	2.92919
C4_07050W_A	3.04979	-0.716457	3.09875	-0.231208	0.817153	1	0
C5_00320W_A	4.55426	-0.716176	2.40878	-0.297319	0.766223	1	0.668426
C1_04380W_A	18.5817	-0.715971	1.14958	-0.622813	0.533407	1	2.92919
C6_03890C_A	4.57468	-0.715737	2.62495	-0.272667	0.785109	1	0
CR_06730W_A	8.38298	-0.715598	1.87934	-0.380771	0.703373	1	0.668426
C3_05590C_A	86.8103	-0.71523	0.592771	-1.20659	0.227591	1	1.66843
C2_04930C_A	6.09958	-0.715136	2.34795	-0.304579	0.760686	1	0.0813911
C4_03620C_A	22.9918	-0.714379	1.02709	-0.695537	0.486719	1	2.88804
C1_02930C_A	1.29667	-0.713028	4.50258	-0.15836	0.874173	1	0
C1_07560W_A	1.29667	-0.713028	4.50258	-0.15836	0.874173	1	0
C2_04570W_A	9.85691	-0.711105	1.55219	-0.458131	0.646858	1	0.511811
C1_12530C_A	5.8305	-0.710533	2.15526	-0.329674	0.741647	1	0.0524941
C1_02620C_A	49.7105	-0.70893	0.748362	-0.947309	0.343481	1	2.01181
C1_03540C_A	6.57889	-0.707252	2.26646	-0.312051	0.755002	1	0.0524941
C2_10570W_A	30.9847	-0.706994	0.917683	-0.770412	0.441056	1	2.88804
C3_02370C_A	72.6973	-0.706595	0.602736	-1.17231	0.241071	1	2.88804
C6_03560W_A	28.7037	-0.705096	0.933667	-0.75519	0.450135	1	2.92919
C1_03790C_A	6.9398	-0.705044	2.23795	-0.315039	0.752732	1	0.511811
C4_03040W_A	4.11823	-0.704998	2.73791	-0.257495	0.796797	1	0.668426
C1_11440C_A	12.6262	-0.703762	1.36911	-0.51403	0.607231	1	0.511811
C2_02460W_A	42.0426	-0.7027	0.833099	-0.843477	0.398962	1	2.01181
CR_02750C_A	20.9691	-0.702427	1.15147	-0.610028	0.541843	1	2.92919
CR_04170W_A	15.7365	-0.702144	1.22576	-0.572825	0.566763	1	0.668426
C3_05150W_A	16.5162	-0.701043	1.23723	-0.566622	0.570971	1	0.668426
C6_03690W_A	10.4689	-0.700856	1.49892	-0.467574	0.640089	1	0.0813911
C2_04040C_A	8.00824	-0.70032	2.12543	-0.329496	0.741781	1	0.0813911
C1_09730W_A	2.59334	-0.699454	3.31998	-0.21068	0.833137	1	0.511811
CR_00140W_A	101.302	-0.698996	0.543786	-1.28543	0.198643	1	1.66843
C3_01710C_A	6.44249	-0.698912	2.06875	-0.337843	0.735481	1	0.511811
C1_11100W_A	3.89001	-0.698735	2.80197	-0.249373	0.803072	1	0.668426
C2_10240W_A	23.4298	-0.697586	1.01608	-0.686548	0.492368	1	1.66843
CR_03690W_A	76.8879	-0.695264	0.616298	-1.12813	0.259266	1	1.66843
C1_10750C_A	11.1618	-0.692058	1.49646	-0.462462	0.64375	1	0.0813911
C1_08290C_A	8.45573	-0.690626	1.67143	-0.413194	0.679465	1	0.668426
C1_11970C_A	9.78423	-0.689979	1.55866	-0.442675	0.658001	1	0.0274261
C3_03310C_A	6.55718	-0.688789	2.18305	-0.315517	0.752369	1	0.0813911
C1_13320C_A	43.4566	-0.68861	0.757858	-0.908627	0.363547	1	2.88804
C6_01700W_A	43.5625	-0.688585	0.813296	-0.84666	0.397185	1	2.92919
C6_03550C_A	2.36511	-0.688416	3.45341	-0.199344	0.841994	1	0
C7_00550C_A	29.8856	-0.687778	0.944295	-0.72835	0.466399	1	2.01181
C6_00750C_A	504.453	-0.687497	0.258036	-2.66434	0.00771389	0.177244	2.93744
CR_03940W_A	4.73023	-0.687074	2.59043	-0.265236	0.790828	1	0.668426
C1_01030W_A	8.13248	-0.68664	1.89995	-0.3614	0.717801	1	0.0524941
C6_00850W_A	25.0375	-0.685722	0.985167	-0.696047	0.4864	1	2.88804
C1_00530C_A	6.86711	-0.681918	2.24673	-0.303515	0.761497	1	0.0274261
CR_02670C_A	22.7839	-0.681158	1.09077	-0.624474	0.532316	1	2.88804
C7_00450C_A	6.88172	-0.677919	1.84514	-0.367408	0.713314	1	0.0274261
C5_03950W_A	6.63889	-0.677504	2.27494	-0.297812	0.765846	1	0.668426
C6_00890W_A	11.2556	-0.676721	1.68465	-0.401699	0.687906	1	0.0813911
C1_05900W_A	47.7405	-0.676479	0.723252	-0.935329	0.349619	1	2.88804
C1_08820C_A	8.59399	-0.675151	1.77705	-0.379928	0.703999	1	0.668426
C1_10310W_A	2.13689	-0.675085	3.60849	-0.187082	0.851596	1	0
CR_09810W_A	2.13689	-0.675085	3.60849	-0.187082	0.851596	1	0
C1_09350W_A	12.0767	-0.674638	1.39019	-0.485284	0.627475	1	0.511811
C7_03870W_A	3.20533	-0.674368	3.03464	-0.222224	0.82414	1	0
C7_00890C_A	31.7248	-0.673764	0.889798	-0.757209	0.448924	1	2.93744
C3_07860C_A	4.27377	-0.673762	2.69734	-0.249788	0.802751	1	0.668426
C7_01520W_A	4.27377	-0.673762	2.69734	-0.249788	0.802751	1	0.511811
C1_10670C_A	28.8414	-0.672219	0.983183	-0.683717	0.494154	1	2.88804
C2_02350C_A	23.3386	-0.671486	1.02453	-0.655409	0.512205	1	2.88804
CR_04860C_A	0.840218	-0.671375	4.80364	-0.139764	0.888847	1	0.511811
CR_10280W_A	0.840218	-0.671375	4.80364	-0.139764	0.888847	1	0.668426
CR_06330C_A	0.840218	-0.671375	4.80364	-0.139764	0.888847	1	0
CR_06790C_A	0.840218	-0.671375	4.80364	-0.139764	0.888847	1	0
C2_02300W_A	0.840218	-0.671375	4.80364	-0.139764	0.888847	1	0
C2_04590C_A	24.1788	-0.670593	1.00874	-0.66478	0.506191	1	2.93744
C3_01450C_A	9.35646	-0.670371	1.6515	-0.405915	0.684805	1	0.0274261
C3_00850C_A	148.364	-0.66926	0.468137	-1.42962	0.152825	1	2.01181
C1_08270C_A	43.9047	-0.668388	0.755041	-0.885233	0.376031	1	2.88804
CR_08660W_A	30.49	-0.667909	0.981554	-0.680461	0.496213	1	2.93744
C1_01000C_A	5.50916	-0.667765	2.26109	-0.295328	0.767743	1	0
CR_05530C_A	11.9753	-0.6669	1.40347	-0.47518	0.634659	1	0.0813911
C1_12180C_A	4.04555	-0.665993	2.75771	-0.241502	0.809166	1	0
C5_04590C_A	40.7453	-0.663186	0.781564	-0.848537	0.396139	1	2.93744
C1_14230C_A	16.0527	-0.66257	1.23323	-0.537263	0.591086	1	0.668426
C3_04740C_A	10.3235	-0.661459	1.51026	-0.437978	0.661402	1	0.0524941
C5_00690C_A	4.88577	-0.66034	2.55766	-0.258181	0.796267	1	0
CR_05830C_A	3.56361	-0.659518	2.68099	-0.245998	0.805683	1	0
CR_09270C_A	25.9676	-0.658959	1.01806	-0.647271	0.517457	1	1.66843
C1_12270W_A	1.90866	-0.658624	3.79116	-0.173726	0.862081	1	0
C1_13940W_A	49.7937	-0.658305	0.745552	-0.882976	0.377249	1	1.66843
C6_03670C_A	167.949	-0.657684	0.405164	-1.62325	0.104536	1	2.01181
C3_03400C_A	22.6303	-0.656691	1.03076	-0.637092	0.524065	1	2.01181
C1_07070C_A	19.5282	-0.656139	1.16719	-0.562153	0.574011	1	2.93744
C6_03150C_A	16.0405	-0.655588	1.28726	-0.509289	0.61055	1	0.511811
C1_12400C_A	11.0656	-0.652928	1.51788	-0.430158	0.667081	1	0.0524941
C3_02320W_A	55.3343	-0.65238	0.685606	-0.951537	0.341332	1	2.93744
C2_09940W_A	118.182	-0.651869	0.522748	-1.247	0.212396	1	2.01181
C5_00890C_A	74.5117	-0.651544	0.657081	-0.991574	0.321405	1	2.01181
C1_10150W_A	80.6006	-0.650706	0.60865	-1.0691	0.285026	1	2.93744
C1_00180W_A	112.307	-0.650651	0.488152	-1.33289	0.182569	1	2.92919
C1_10540C_A	15.2667	-0.649933	1.25035	-0.519803	0.603201	1	0.511811
C5_00170W_A	12.7702	-0.648496	1.59038	-0.407762	0.683449	1	0.511811
C6_02070C_A	37.5815	-0.648465	0.837805	-0.774005	0.438928	1	2.92919
C3_04530C_A	8.79864	-0.647561	1.66673	-0.388522	0.69763	1	0.0813911
CR_01420W_A	18.6912	-0.644826	1.15669	-0.557476	0.577202	1	1.66843
C4_01230C_A	17.5673	-0.644509	1.21081	-0.532296	0.594521	1	0.0524941
C6_00870C_A	78.6961	-0.644501	0.610978	-1.05487	0.291486	1	2.92919
C1_12210W_A	11.452	-0.64375	4.41275	-0.145884	0.884013	1	0.668426
C1_09170W_A	23.4125	-0.642876	1.06588	-0.603142	0.546414	1	2.92919
C3_04910C_A	128.316	-0.642846	0.455838	-1.41025	0.158466	1	2.92919
C3_04410C_A	52.6683	-0.640459	0.688398	-0.930362	0.352184	1	2.93744
C2_03960W_A	38.9202	-0.639471	0.81201	-0.787516	0.43098	1	2.92919
C2_04810W_A	6.51523	-0.639043	2.1175	-0.301791	0.762811	1	0.511811
C5_04670W_A	22.7042	-0.63882	1.09868	-0.581441	0.560943	1	2.01181
C2_00970C_A	22.615	-0.638008	1.03772	-0.614815	0.538677	1	2.88804
C1_12150C_A	1.68044	-0.637753	4.01037	-0.159026	0.873648	1	0
C2_00030W_A	1.68044	-0.637753	4.01037	-0.159026	0.873648	1	0.668426
C2_08950W_A	1.68044	-0.637753	4.01037	-0.159026	0.873648	1	0.668426
C2_08170W_A	1.68044	-0.637753	4.01037	-0.159026	0.873648	1	0
C6_02130C_A	1.68044	-0.637753	4.01037	-0.159026	0.873648	1	0
C1_08100W_A	9.76257	-0.636718	1.55462	-0.409565	0.682125	1	0.668426
CR_02570C_A	3.36087	-0.636386	2.97505	-0.213908	0.830619	1	0
C1_12490W_A	115.18	-0.636263	0.489466	-1.29991	0.193632	1	2.92919
C1_10930C_A	8.34219	-0.634975	1.73013	-0.367011	0.713611	1	0.0274261
C1_06460C_A	19.8542	-0.632918	4.58197	-0.138132	0.890136	1	2.93744
C5_02750C_A	20.1339	-0.632623	1.12262	-0.563525	0.573077	1	2.01181
C4_06800W_A	32.9519	-0.632376	0.884063	-0.715307	0.474419	1	2.01181
C2_08550C_A	0.611993	-0.631143	4.8117	-0.131168	0.895642	1	0
C2_06480W_A	0.611993	-0.631143	4.8117	-0.131168	0.895642	1	0
CR_00710C_A	0.611993	-0.631143	4.8117	-0.131168	0.895642	1	0.511811
C4_00060W_A	0.611993	-0.631143	4.8117	-0.131168	0.895642	1	0.668426
C3_02490C_A	50.7666	-0.630082	0.703017	-0.896255	0.370116	1	1.66843
C2_08590W_A	8.3767	-0.627232	1.86683	-0.335988	0.73688	1	0.0524941
CR_01580C_A	11.8268	-0.62671	1.43136	-0.437841	0.661502	1	0.0813911
C7_01710W_A	45.4894	-0.625746	0.777413	-0.804908	0.420873	1	2.88804
CR_02270C_A	1.45221	-0.625204	4.28465	-0.145917	0.883987	1	0.511811
C2_04940C_A	1.45221	-0.625204	4.28465	-0.145917	0.883987	1	0
C5_01060C_A	1.45221	-0.625204	4.28465	-0.145917	0.883987	1	0.668426
C3_04780C_A	27.676	-0.625152	0.958016	-0.652549	0.514047	1	2.88804
C1_11670W_A	43.5969	-0.624349	0.846166	-0.737856	0.460602	1	2.93744
C3_03250W_A	18.6122	-0.622006	1.15507	-0.538502	0.590231	1	2.88804
C6_00760W_A	4.38846	-0.620689	2.44678	-0.253676	0.799746	1	0
CR_02640W_A	36.5549	-0.620678	0.877911	-0.706994	0.47957	1	2.93744
C3_02020W_A	18.4445	-0.620145	1.17036	-0.529876	0.596198	1	2.01181
C7_04340C_A	1.22399	-0.6197	4.61497	-0.13428	0.893181	1	0
C1_10950C_A	2.29243	-0.619664	3.49997	-0.177048	0.85947	1	0
C4_03780C_A	2.29243	-0.619664	3.49997	-0.177048	0.85947	1	0.668426
C1_12830C_A	36.0456	-0.617969	0.84306	-0.733007	0.463554	1	2.88804
C1_06790C_A	8.36768	-0.617835	1.69938	-0.363566	0.716182	1	0.0524941
C2_08040C_A	47.9998	-0.616237	0.765757	-0.804743	0.420968	1	2.93744
C5_01270W_A	31.7431	-0.615497	0.922566	-0.667157	0.504672	1	2.92919
C1_00680W_A	3.74464	-0.614617	2.84588	-0.215967	0.829013	1	0
CR_08020C_A	3.21359	-0.614055	2.57785	-0.238205	0.811722	1	0
CR_06740W_A	13.9342	-0.613369	1.37113	-0.447345	0.654626	1	0.668426
CR_05670C_A	45.2264	-0.611347	4.57087	-0.133748	0.893602	1	2.93744
CR_00620C_A	296.036	-0.610864	0.33047	-1.84847	0.0645343	0.935467	1.66843
C2_06660W_A	6.55724	-0.610389	1.94027	-0.31459	0.753073	1	0.511811
CR_01610C_A	25.4588	-0.608496	1.0268	-0.592615	0.553439	1	2.88804
C4_06340W_A	103.778	-0.607914	0.580627	-1.047	0.295101	1	2.93744
C4_02500C_A	20.6527	-0.60744	1.23476	-0.491951	0.622754	1	2.88804
C5_00400C_A	39.9572	-0.606357	0.804343	-0.753853	0.450937	1	2.01181
C3_02850C_A	10.1514	-0.606282	1.53191	-0.39577	0.692275	1	0.0813911
C1_01530C_A	46.8242	-0.606251	0.76335	-0.794197	0.427081	1	2.92919
C7_00720W_A	39.7048	-0.606037	0.905785	-0.669073	0.503449	1	2.93744
C2_01820C_A	7.78437	-0.60581	1.7813	-0.340095	0.733785	1	0.0524941
C7_03980W_A	5.99622	-0.605312	2.13309	-0.283772	0.776585	1	0.0813911
C1_02220C_A	15.5101	-0.603796	1.24177	-0.486239	0.626798	1	0.668426
C1_07180W_A	21.0512	-0.603627	1.08232	-0.557716	0.577038	1	2.88804
C5_02270W_A	36.6277	-0.603468	0.828458	-0.728424	0.466354	1	2.88804
C2_02120W_A	3.51642	-0.601917	2.9203	-0.206115	0.836701	1	0
C1_08920W_A	3.51642	-0.601917	2.9203	-0.206115	0.836701	1	0.511811
C5_02400W_A	23.777	-0.601769	1.27942	-0.470344	0.638109	1	1.66843
C6_04130C_A	7.23557	-0.600049	1.97262	-0.304189	0.760984	1	0.0274261
C1_03240W_A	4.10292	-0.599367	2.5023	-0.239526	0.810697	1	0
C3_05470W_A	22.8745	-0.599021	1.10053	-0.544302	0.586234	1	2.92919
C1_06710W_A	2.0642	-0.598531	3.66293	-0.163402	0.870202	1	0
C2_10770W_A	2.0642	-0.598531	3.66293	-0.163402	0.870202	1	0
C1_05410C_A	16.9419	-0.598083	1.19948	-0.498621	0.618047	1	0.511811
C4_06450W_A	7.20106	-0.597013	1.96537	-0.303767	0.761306	1	0.0813911
C4_06670W_A	19.564	-0.596873	1.13897	-0.524044	0.600248	1	2.01181
C2_06990W_A	10.6652	-0.594808	1.47495	-0.403274	0.686747	1	0.0813911
C5_03150W_A	84.4995	-0.594771	0.576768	-1.03121	0.302441	1	2.92919
C4_01050C_A	30.5466	-0.594631	0.901938	-0.659281	0.509715	1	1.66843
C1_12030W_A	68.3939	-0.594074	0.617079	-0.96272	0.335688	1	2.88804
C6_03770C_A	12.3775	-0.593543	1.38881	-0.427376	0.669106	1	0.0813911
C4_00140C_A	66.046	-0.593258	0.635091	-0.93413	0.350237	1	2.01181
C4_01390W_A	86.3271	-0.59061	0.575972	-1.02541	0.305168	1	2.92919
C5_01110W_A	3.28819	-0.587524	3.00229	-0.195692	0.844852	1	0
C1_12340C_A	3.90018	-0.58445	2.79905	-0.208803	0.834602	1	0.511811
CR_06430W_A	0.995761	-0.584035	4.79917	-0.121695	0.90314	1	0
CR_08190W_A	0.995761	-0.584035	4.79917	-0.121695	0.90314	1	0
CR_05630W_A	0.995761	-0.584035	4.79917	-0.121695	0.90314	1	0
C1_12770W_A	21.0742	-0.583736	1.18977	-0.490631	0.623687	1	2.88804
CR_02560C_A	15.157	-0.583569	1.25744	-0.464094	0.64258	1	0.0524941
C4_05970W_A	7.18837	-0.583474	2.21008	-0.264005	0.791776	1	0.668426
C4_04470W_A	7.58483	-0.582953	1.86765	-0.312132	0.75494	1	0.668426
C3_06420C_A	4.51218	-0.582039	2.6396	-0.220503	0.82548	1	0.668426
C4_01520C_A	42.6729	-0.579857	0.772932	-0.750205	0.453131	1	2.92919
C7_00730W_A	34.5621	-0.579154	0.891326	-0.649767	0.515843	1	1.66843
CR_04810W_A	46.0848	-0.578831	0.764918	-0.756722	0.449216	1	2.93744
C3_04670C_A	49.454	-0.578689	0.73857	-0.783527	0.433318	1	1.66843
C7_01970C_A	27.1436	-0.577853	0.996554	-0.579851	0.562015	1	1.66843
C7_03840W_A	20.4985	-0.57785	1.09964	-0.525491	0.599242	1	2.01181
C1_12250C_A	28.5939	-0.577049	0.952225	-0.606001	0.544514	1	2.92919
C4_01950W_A	11.7744	-0.576344	1.63139	-0.353283	0.723876	1	0.0274261
C3_04400C_A	15.3062	-0.57457	1.35599	-0.423726	0.671766	1	0.668426
C7_01580W_A	29.5897	-0.574506	0.928165	-0.618969	0.535937	1	2.88804
C1_06090C_A	11.9925	-0.573376	1.42223	-0.403152	0.686837	1	0.0274261
C3_01890C_A	69.6375	-0.572356	0.603675	-0.948119	0.343069	1	2.88804
C2_05290C_A	12.1582	-0.572282	1.61178	-0.355063	0.722543	1	0.511811
C3_05790C_A	1.83598	-0.572245	3.85599	-0.148404	0.882024	1	0.511811
C5_05510C_A	1.83598	-0.572245	3.85599	-0.148404	0.882024	1	0
C1_02600W_A	16.4919	-0.571842	1.33329	-0.428896	0.667999	1	0.0524941
C1_05370C_A	5.31154	-0.57111	2.24699	-0.254166	0.799367	1	0.511811
CR_07250C_A	3.05997	-0.571016	3.09453	-0.184524	0.853602	1	0.511811
C5_01100C_A	43.8707	-0.570592	0.78545	-0.726452	0.467561	1	2.88804
C4_03850W_A	13.1539	-0.570167	1.56589	-0.364116	0.715771	1	0.0524941
C1_00320W_A	4.28395	-0.57001	2.69494	-0.211511	0.832488	1	0
C1_04180W_A	118.789	-0.570001	0.497088	-1.14668	0.251514	1	2.93744
C2_00250W_A	60.232	-0.569724	0.798544	-0.713454	0.475565	1	2.01181
C7_01990C_A	10.5403	-0.569374	1.49989	-0.37961	0.704235	1	0.0524941
C1_07820W_A	7.48346	-0.56889	1.83822	-0.309478	0.756958	1	0.0274261
C1_04220C_A	9.31944	-0.568737	1.59292	-0.35704	0.721062	1	0.0813911
C4_04170C_A	69.8727	-0.568319	0.608909	-0.933341	0.350644	1	2.93744
CR_01720W_A	14.2122	-0.566469	1.33535	-0.424209	0.671414	1	0.0274261
CR_03740C_A	12.5464	-0.566414	1.50965	-0.375194	0.707516	1	0.511811
C3_07480W_A	7.91506	-0.566044	1.91131	-0.296155	0.767112	1	0.511811
C2_06730W_A	134.572	-0.565591	0.453043	-1.24843	0.211874	1	2.88804
C2_04750W_A	10.9272	-0.565553	1.46643	-0.385667	0.699743	1	0.0524941
C4_00010W_A	17.4691	-0.564908	1.21555	-0.464732	0.642123	1	0.0813911
C2_00740C_A	25.2381	-0.564873	1.06153	-0.532133	0.594634	1	2.92919
C2_01890W_A	19.5556	-0.564397	1.13115	-0.498958	0.617809	1	2.01181
C1_08500C_A	1071.72	-0.563086	0.208151	-2.70518	0.00682668	0.244521	1.66843
C2_06250C_A	20.8523	-0.562626	1.09386	-0.514349	0.607008	1	1.66843
C3_02400C_A	44.1282	-0.561906	0.782203	-0.718363	0.472534	1	1.66843
C4_06930C_A	6.5037	-0.559982	2.29297	-0.244216	0.807063	1	0.0813911
C5_05450C_A	4.08756	-0.559652	2.53578	-0.220702	0.825325	1	0
C1_05440C_A	33.7698	-0.559624	0.904039	-0.619026	0.535899	1	2.93744
C2_05850C_A	10.094	-0.559348	1.73716	-0.32199	0.74746	1	0.0274261
C2_10200W_A	5.27971	-0.558868	2.48177	-0.225189	0.821832	1	0
C5_00380W_A	11.9262	-0.557821	1.43169	-0.389624	0.696815	1	0.0274261
C2_04130W_A	16.3102	-0.557106	1.26427	-0.440655	0.659463	1	0.0813911
C6_00700C_A	4.05573	-0.556707	2.75506	-0.202067	0.839864	1	0
C3_04420W_A	22.2828	-0.556637	1.10858	-0.502118	0.615585	1	1.66843
CR_00430C_A	6.20722	-0.556621	1.96974	-0.282586	0.777494	1	0.0813911
CR_08960C_A	15.5522	-0.555693	1.27431	-0.436075	0.662782	1	0.668426
C7_01810W_A	23.4609	-0.55329	1.04004	-0.531991	0.594732	1	2.01181
C1_13000W_A	0.383768	-0.552422	4.82544	-0.114481	0.908856	1	0.668426
C1_10920W_A	2.83174	-0.551906	3.19672	-0.172648	0.862928	1	0.511811
CR_02200C_A	23.9033	-0.551838	1.00575	-0.548683	0.583223	1	1.66843
CR_10840C_A	87.3017	-0.551496	0.545122	-1.01169	0.311684	1	2.93744
C3_07310C_A	409.146	-0.548807	0.306414	-1.79106	0.0732835	0.764385	2.92919
C3_03480C_A	24.0206	-0.54862	1.05194	-0.521529	0.601998	1	2.92919
C2_00440W_A	2.21975	-0.547206	3.5488	-0.154195	0.877456	1	0.668426
C2_04340C_A	2.21975	-0.547206	3.5488	-0.154195	0.877456	1	0
CR_04630C_A	9.24676	-0.545885	1.60082	-0.341004	0.7331	1	0.0274261
C2_10260C_A	34.5951	-0.545692	0.890945	-0.612487	0.540216	1	2.92919
C4_06730C_A	28.0419	-0.543007	0.935211	-0.580625	0.561493	1	2.92919
C1_03010W_A	20.327	-0.54293	1.20155	-0.451857	0.651372	1	2.92919
C2_01550W_A	18.5382	-0.54257	1.17024	-0.463639	0.642906	1	2.93744
C5_03400C_A	3.8275	-0.541708	2.82066	-0.19205	0.847703	1	0
C3_00170C_A	113.536	-0.540336	0.481106	-1.12311	0.261389	1	2.01181
C1_08900W_A	34.0241	-0.540295	0.858222	-0.629551	0.528988	1	2.88804
C1_00030C_A	1.37953	-0.539831	4.37922	-0.123271	0.901893	1	0
C2_08080C_A	1.37953	-0.539831	4.37922	-0.123271	0.901893	1	0
C5_01170W_A	1.37953	-0.539831	4.37922	-0.123271	0.901893	1	0.511811
C4_06660W_A	9.69372	-0.539224	1.7713	-0.304423	0.760806	1	0.511811
CR_05370W_A	3.80201	-0.539163	2.58791	-0.208339	0.834964	1	0
C1_08140W_A	1.60775	-0.538601	4.09259	-0.131604	0.895298	1	0
C1_02310C_A	1.60775	-0.538601	4.09259	-0.131604	0.895298	1	0.511811
C1_11880W_A	1.60775	-0.538601	4.09259	-0.131604	0.895298	1	0
C2_03880C_A	1.60775	-0.538601	4.09259	-0.131604	0.895298	1	0
C5_02810W_A	1.60775	-0.538601	4.09259	-0.131604	0.895298	1	0.668426
C2_05460W_A	360.672	-0.538342	0.330729	-1.62774	0.103579	0.925485	2.88804
C1_12360C_A	120.556	-0.537052	0.486274	-1.10442	0.269409	1	2.92919
C4_01440W_A	7.85774	-0.537033	1.91089	-0.281038	0.778681	1	0.668426
C5_01420W_A	16.4002	-0.534065	1.44849	-0.368705	0.712348	1	0.668426
C2_01910W_A	7.48538	-0.531738	1.75736	-0.302579	0.762211	1	0.0274261
C2_09280C_A	4.21127	-0.530986	2.71363	-0.195674	0.844866	1	0.511811
C2_09220W_A	406.372	-0.530742	0.285485	-1.85909	0.0630144	0.929954	1.66843
CR_01210C_A	22.5198	-0.53068	1.14293	-0.464315	0.642422	1	2.88804
C2_07600C_A	21.7989	-0.530367	1.12046	-0.473346	0.635966	1	1.66843
C6_01890C_A	0.767535	-0.530046	4.80504	-0.11031	0.912163	1	0
C5_02290W_A	0.767535	-0.530046	4.80504	-0.11031	0.912163	1	0
C2_03220C_A	2.60351	-0.529506	3.31395	-0.159781	0.873054	1	0
C1_06590C_A	11.0879	-0.528445	1.4573	-0.362619	0.71689	1	0.0524941
C1_03320C_A	6.81478	-0.527839	2.25393	-0.234186	0.81484	1	0.0274261
C1_06660W_A	39.3017	-0.52768	0.815945	-0.64671	0.51782	1	1.66843
CR_03610C_A	160.741	-0.525452	0.425908	-1.23372	0.217307	1	2.88804
C2_02050C_A	30.4969	-0.525331	0.920606	-0.570636	0.568246	1	2.88804
C4_00260W_A	15.0964	-0.523387	1.29641	-0.403721	0.686418	1	0.668426
C3_05140C_A	7.43946	-0.521086	1.90446	-0.273614	0.784381	1	0.0813911
C1_13350W_A	53.4279	-0.520845	0.687416	-0.757686	0.448639	1	2.88804
C1_03780C_A	27.2118	-0.520238	0.946936	-0.549391	0.582737	1	2.88804
CR_00240W_A	5.5908	-0.519965	2.42783	-0.214169	0.830415	1	0
C3_00480C_A	6.89067	-0.518285	2.00321	-0.258727	0.795846	1	0.0274261
C7_01660C_A	12.0956	-0.517606	1.61731	-0.320041	0.748937	1	0.0524941
C1_01950C_A	1.99152	-0.517344	3.72052	-0.139052	0.889409	1	0
C2_04560W_A	1.99152	-0.517344	3.72052	-0.139052	0.889409	1	0
C4_03880W_A	1.99152	-0.517344	3.72052	-0.139052	0.889409	1	0
C7_00930W_A	239.845	-0.517086	0.365965	-1.41294	0.157674	1	2.92919
C6_01050W_A	2.98728	-0.516211	3.12571	-0.16515	0.868826	1	0
C1_08050W_A	2.98728	-0.516211	3.12571	-0.16515	0.868826	1	0.668426
C2_04320W_A	3.98304	-0.515269	2.77541	-0.185655	0.852716	1	0.668426
C1_11850W_A	9.32647	-0.514377	1.58259	-0.325023	0.745164	1	0.0524941
C2_04770W_A	12.459	-0.514267	1.60913	-0.319594	0.749276	1	0.0274261
C1_08020W_A	8.76674	-0.512096	1.62969	-0.314229	0.753347	1	0.668426
C1_12880C_A	13.495	-0.511625	1.3272	-0.385492	0.699873	1	0.0813911
CR_00570W_A	12.6311	-0.511125	1.44962	-0.352592	0.724395	1	0.0813911
C2_04660C_A	13.5173	-0.509828	1.32986	-0.383371	0.701445	1	0.511811
C2_02590W_A	476.241	-0.50956	0.287758	-1.77079	0.0765951	0.933432	2.01181
C4_03350C_A	3.37105	-0.505881	2.97135	-0.170253	0.864811	1	0.511811
C1_02330C_A	38.9269	-0.505818	0.802088	-0.630627	0.528285	1	2.88804
C7_00990W_A	136.509	-0.505552	0.440986	-1.14641	0.251624	1	2.88804
C5_04470C_A	110.269	-0.504204	0.513676	-0.981561	0.326316	1	2.88804
C2_04850C_A	42.3266	-0.502856	0.771416	-0.651861	0.514491	1	2.92919
C1_11130W_A	2.37529	-0.502826	3.44647	-0.145896	0.884004	1	0.511811
C7_02340C_A	6.75479	-0.502525	2.32273	-0.216351	0.828714	1	0.511811
C1_12660W_A	9.8759	-0.502501	1.75704	-0.285993	0.774884	1	0.511811
C6_04120C_A	14.5449	-0.500896	1.28083	-0.391073	0.695743	1	0.0524941
C2_06860W_A	12.5356	-0.500765	1.62688	-0.307807	0.758229	1	0.511811
C1_09320C_A	8.49637	-0.499763	1.88486	-0.265146	0.790897	1	0.0813911
C3_01910C_A	21.7741	-0.498471	1.11618	-0.446587	0.655173	1	2.93744
C2_01610C_A	63.4441	-0.498278	0.629634	-0.791377	0.428724	1	2.93744
C3_03050C_A	3.75482	-0.497602	2.84293	-0.175031	0.861055	1	0
C5_04140W_A	77.6499	-0.497568	0.584947	-0.850621	0.39498	1	1.66843
C1_07710C_A	35.4973	-0.497216	0.852423	-0.583298	0.559693	1	2.92919
C1_02530C_A	50.4519	-0.496042	0.73579	-0.674163	0.500208	1	1.66843
CR_10130W_A	5.13435	-0.494602	2.5091	-0.197123	0.843731	1	0
C1_13970C_A	11.1739	-0.494428	1.47985	-0.334106	0.7383	1	0.511811
C1_01630W_A	18.4725	-0.494138	1.21368	-0.40714	0.683905	1	2.92919
C3_02130W_A	7.92652	-0.493544	1.72809	-0.285601	0.775184	1	0.511811
C2_00770W_A	9.25379	-0.492853	1.58753	-0.310453	0.756216	1	0.511811
CR_05200C_A	12.5623	-0.492609	1.5956	-0.308729	0.757528	1	0.0813911
C1_07380C_A	2.75906	-0.492312	3.23289	-0.152283	0.878964	1	0
C3_05270C_A	34.3892	-0.49164	0.85295	-0.5764	0.564345	1	1.66843
C3_05170W_A	54.7863	-0.491309	0.732485	-0.670743	0.502384	1	2.92919
C3_02230C_A	15.032	-0.490582	1.26234	-0.38863	0.69755	1	0.0813911
C2_00490W_A	15.3666	-0.489942	1.26989	-0.385815	0.699633	1	0.668426
C1_03360W_A	29.0045	-0.489163	0.980619	-0.498831	0.617899	1	2.93744
CR_07600W_A	17.1281	-0.488902	1.19667	-0.408553	0.682867	1	0.668426
C4_01420W_A	19.5861	-0.487182	1.13298	-0.430001	0.667195	1	2.93744
C3_05960W_A	15.8269	-0.486625	1.36963	-0.355296	0.722368	1	0.0274261
C2_08290C_A	554.005	-0.48635	0.308248	-1.57779	0.114614	0.935467	2.93744
C2_04410W_A	12.2206	-0.486293	1.38543	-0.351007	0.725583	1	0.511811
C7_00840C_A	12.7178	-0.48472	1.5887	-0.305104	0.760287	1	0.511811
C3_03760W_A	68.5592	-0.483736	0.615106	-0.786426	0.431618	1	2.88804
C5_00210C_A	33.776	-0.483097	0.853006	-0.566346	0.571159	1	2.01181
C7_00850W_A	21.0129	-0.481759	1.10343	-0.4366	0.662401	1	2.92919
C1_01720C_A	3.32514	-0.481178	2.5793	-0.186554	0.85201	1	0.511811
C2_05070W_A	31.8131	-0.480896	0.883117	-0.544544	0.586067	1	2.92919
C1_12100C_A	15.0606	-0.480633	1.25217	-0.383841	0.701097	1	0.0813911
C6_01970C_A	60.9973	-0.479992	0.658608	-0.728797	0.466126	1	2.01181
C1_04200C_A	21.8913	-0.478838	1.12341	-0.426235	0.669937	1	2.92919
C6_02630C_A	19.9495	-0.478824	1.12946	-0.42394	0.671609	1	2.92919
C7_03060C_A	12.4284	-0.477747	1.37157	-0.348322	0.727598	1	0.511811
C1_03350C_A	14.1171	-0.477029	1.29532	-0.368272	0.71267	1	0.668426
C4_05580C_A	17.4583	-0.47645	1.24971	-0.381248	0.70302	1	0.0813911
C1_04970W_A	24.1212	-0.47628	1.03265	-0.461221	0.64464	1	2.88804
C1_01670C_A	10.6384	-0.476026	1.50595	-0.316096	0.751929	1	0.0524941
C2_10170C_A	39.7703	-0.474149	0.789639	-0.600463	0.548197	1	1.66843
CR_02430C_A	12.644	-0.473413	4.49291	-0.105369	0.916083	1	0.0524941
C1_12410C_A	40.6965	-0.472661	0.795263	-0.594345	0.552281	1	2.88804
C6_00670W_A	22.3802	-0.472547	1.04521	-0.452107	0.651192	1	1.66843
C6_04580W_A	887.859	-0.472394	0.2223	-2.12503	0.0335843	0.612897	2.01181
C3_06470W_A	7.62432	-0.472299	1.9411	-0.243316	0.807761	1	0.668426
C1_13190W_A	38.2103	-0.471204	0.808665	-0.582694	0.5601	1	2.88804
C3_03000W_A	2.14706	-0.470623	3.60038	-0.130715	0.896001	1	0
C3_07100C_A	22.6117	-0.470007	1.05188	-0.446824	0.655002	1	2.01181
C6_00560W_A	13.3248	-0.469737	1.38679	-0.338723	0.734819	1	0.668426
C4_03120C_A	19.7672	-0.469681	1.11846	-0.419936	0.674532	1	2.93744
C2_10690W_A	60.061	-0.469509	0.694131	-0.676399	0.498787	1	2.01181
C6_01550C_A	28.711	-0.468737	0.983239	-0.476727	0.633556	1	2.01181
C5_03680W_A	14.9683	-0.468629	1.48948	-0.314627	0.753045	1	0.511811
C1_01140C_A	27.9563	-0.468045	1.01797	-0.459784	0.645672	1	2.88804
C1_01260C_A	2.53083	-0.464043	3.35443	-0.138337	0.889974	1	0.511811
C2_02230C_A	41.8116	-0.463828	0.794928	-0.583485	0.559567	1	2.01181
C7_02800W_A	85.6424	-0.461697	0.586219	-0.787584	0.43094	1	1.66843
C6_02410W_A	16.9959	-0.461543	1.27664	-0.361529	0.717704	1	0.668426
C3_03430C_A	2.9146	-0.459083	3.15831	-0.145357	0.884429	1	0.668426
C7_00260C_A	38.3364	-0.458919	0.849836	-0.540008	0.589191	1	1.66843
C3_06030W_A	17.8866	-0.45858	1.22046	-0.375742	0.707108	1	0.0274261
C5_04060C_A	25.2508	-0.457469	0.980017	-0.466797	0.640645	1	1.66843
C6_00710W_A	14.2268	-0.456448	1.34507	-0.339349	0.734347	1	0.0813911
C6_03750C_A	15.7382	-0.456308	1.27771	-0.357129	0.720995	1	0.0524941
C3_02470C_A	31.9382	-0.456051	1.05567	-0.432	0.665742	1	2.93744
C6_00960W_A	11.7183	-0.455186	1.44115	-0.31585	0.752116	1	0.668426
C1_01370C_A	48.6307	-0.454892	0.719371	-0.632347	0.52716	1	2.88804
C2_06920C_A	29.5513	-0.454855	0.911659	-0.498931	0.617828	1	1.66843
C4_03700W_A	48.3793	-0.454481	0.783262	-0.580241	0.561752	1	2.88804
CR_08450C_A	17.7285	-0.454223	1.18868	-0.382123	0.70237	1	0.511811
C1_06360W_A	7.57335	-0.45333	1.75471	-0.25835	0.796137	1	0.0524941
C2_06700W_A	27.4228	-0.453301	0.999989	-0.453306	0.650328	1	1.66843
C6_02590C_A	15.7351	-0.452643	1.22697	-0.368911	0.712194	1	0.0524941
C1_05050C_A	3.68213	-0.452004	2.86591	-0.157718	0.874679	1	0.668426
C4_06820C_A	22.6378	-0.451722	1.06055	-0.425932	0.670158	1	2.92919
C7_02330W_A	74.1817	-0.450157	0.593648	-0.758289	0.448278	1	1.66843
C5_01930W_A	11.9739	-0.449522	1.41057	-0.318681	0.749968	1	0.0274261
C4_06440C_A	8.06163	-0.449255	1.77867	-0.25258	0.800593	1	0.511811
C3_07580W_A	15.1467	-0.447782	1.28185	-0.349324	0.726846	1	0.511811
C4_01500W_A	1.30685	-0.447585	4.48159	-0.0998719	0.920446	1	0
C3_00050C_A	1.30685	-0.447585	4.48159	-0.0998719	0.920446	1	0.511811
C6_00140C_A	5.73226	-0.446969	2.05322	-0.217691	0.82767	1	0.0274261
C1_00660C_A	15.7943	-0.446269	1.30145	-0.3429	0.731674	1	0.0524941
C2_02020W_A	23.7247	-0.445735	1.05887	-0.420953	0.673789	1	1.66843
C3_00280C_A	4.83344	-0.44521	2.5693	-0.173281	0.862431	1	0.668426
C1_12750C_A	1.53507	-0.444771	4.17762	-0.106465	0.915213	1	0.511811
C1_09810W_A	1.53507	-0.444771	4.17762	-0.106465	0.915213	1	0.668426
C3_02460C_A	1.53507	-0.444771	4.17762	-0.106465	0.915213	1	0
CR_04920W_A	1.53507	-0.444771	4.17762	-0.106465	0.915213	1	0
C1_00560W_A	1.53507	-0.444771	4.17762	-0.106465	0.915213	1	0
C2_07060W_A	1.53507	-0.444771	4.17762	-0.106465	0.915213	1	0.511811
C1_12260W_A	1.53507	-0.444771	4.17762	-0.106465	0.915213	1	0.668426
C4_04990C_A	1.53507	-0.444771	4.17762	-0.106465	0.915213	1	0
C1_08230C_A	5.52131	-0.444495	2.20738	-0.201368	0.840411	1	0
C6_04550C_A	11.8993	-0.443986	1.40118	-0.316866	0.751345	1	0.0524941
CR_00160C_A	12.2831	-0.443964	1.37969	-0.321786	0.747615	1	0.0274261
CR_06050W_A	15.3532	-0.443731	1.25239	-0.354308	0.723108	1	0.668426
C4_05460C_A	16.6358	-0.443614	1.22659	-0.361664	0.717603	1	0.668426
C3_02410C_A	5.2172	-0.443527	2.49381	-0.177851	0.85884	1	0
C1_13170C_A	34.6468	-0.442945	0.841882	-0.526137	0.598793	1	2.93744
C7_03610C_A	17.3779	-0.442931	1.21132	-0.365659	0.71462	1	0.0274261
C5_05330C_A	8.50655	-0.441587	1.88935	-0.233724	0.815199	1	0.0524941
C1_02210W_A	10.3006	-0.440521	1.69944	-0.259216	0.795469	1	0.511811
C3_05680W_A	8.29178	-0.439934	1.66413	-0.264363	0.7915	1	0.0524941
CR_08810W_A	430.889	-0.439746	0.309966	-1.41869	0.155989	1	2.92919
C2_09010W_A	15.5846	-0.439365	1.23987	-0.354363	0.723067	1	0.668426
C4_06250C_A	43.2368	-0.439129	0.815972	-0.538167	0.590462	1	2.93744
C5_03050C_A	0.53931	-0.438025	4.81409	-0.090988	0.927502	1	0.668426
C2_07800W_A	0.53931	-0.438025	4.81409	-0.090988	0.927502	1	0
CR_08510W_A	0.53931	-0.438025	4.81409	-0.090988	0.927502	1	0
C4_05360C_A	0.53931	-0.438025	4.81409	-0.090988	0.927502	1	0.668426
C1_13440C_A	76.5799	-0.437022	0.614925	-0.710693	0.477275	1	2.88804
C3_07700W_A	7.91498	-0.435385	1.91436	-0.227432	0.820088	1	0.0813911
C3_05310W_A	27.67	-0.434429	0.953525	-0.455604	0.648675	1	1.66843
C1_09950C_A	17.6877	-0.434006	1.1832	-0.366807	0.713763	1	0.0524941
C3_02600C_A	15.3379	-0.43276	1.31929	-0.328024	0.742894	1	0.668426
CR_05540C_A	20.9587	-0.432192	1.1075	-0.39024	0.696359	1	2.93744
C2_07740W_A	87.1183	-0.431926	0.547365	-0.789101	0.430053	1	2.01181
C1_00740C_A	32.9918	-0.431788	0.861101	-0.501438	0.616063	1	1.66843
C1_11980W_A	5.45178	-0.431658	2.0221	-0.21347	0.83096	1	0.668426
C4_02060C_A	99.2153	-0.43156	0.559903	-0.770776	0.44084	1	2.92919
C2_09570C_A	1.91884	-0.430935	3.78157	-0.113957	0.909272	1	0.511811
C6_02020C_A	1.91884	-0.430935	3.78157	-0.113957	0.909272	1	0
C7_01600W_A	2.30261	-0.430349	3.49304	-0.123202	0.901947	1	0
CR_04650W_A	2.30261	-0.430349	3.49304	-0.123202	0.901947	1	0.668426
CR_06420W_A	22.5274	-0.429903	1.0509	-0.409079	0.682482	1	2.01181
C4_06160W_A	3.45391	-0.428845	2.94235	-0.145749	0.884119	1	0
C4_02520C_A	3.83768	-0.428409	2.81796	-0.152028	0.879165	1	0
C1_00160C_A	5.95925	-0.426708	2.12644	-0.200667	0.840959	1	0.0813911
CR_05100W_A	16.6633	-0.426459	1.19843	-0.35585	0.721953	1	0.511811
C3_07500W_A	39.5572	-0.426314	0.815205	-0.522953	0.601007	1	2.92919
CR_03200C_A	11.4174	-0.42616	1.46412	-0.29107	0.770998	1	0.0524941
C5_04660C_A	6.52405	-0.425715	2.29114	-0.185809	0.852595	1	0.0524941
C7_02470C_A	6.52405	-0.425715	2.29114	-0.185809	0.852595	1	0.511811
C3_05180W_A	8.29369	-0.424925	1.67673	-0.253425	0.79994	1	0.0813911
C7_00170W_A	27.2895	-0.424778	0.945375	-0.449322	0.653199	1	2.92919
C1_11220C_A	23.0904	-0.424757	1.02111	-0.415975	0.677428	1	2.92919
C2_00710W_A	21.5285	-0.424636	1.05595	-0.402136	0.687584	1	2.88804
C1_00870W_A	8.82666	-0.423867	2.05645	-0.206116	0.8367	1	0.511811
C1_14530W_A	21.0434	-0.422738	1.07326	-0.393883	0.693668	1	2.88804
C5_03130W_A	23.9376	-0.422	1.01882	-0.414205	0.678724	1	2.88804
CR_07170W_A	5.02081	-0.421657	2.30993	-0.182541	0.855158	1	0.511811
C1_13050W_A	57.9807	-0.421039	0.664698	-0.633428	0.526454	1	2.01181
C2_01620W_A	36.7408	-0.419878	0.830308	-0.50569	0.613075	1	2.93744
C7_02600C_A	11.5461	-0.418851	1.41958	-0.295053	0.767953	1	0.0813911
C3_00730W_A	14.5417	-0.418703	1.27162	-0.329266	0.741955	1	0.0813911
CR_04600W_A	10.1647	-0.418324	1.54434	-0.270876	0.786487	1	0.511811
C2_09140C_A	12.7765	-0.417729	1.38654	-0.301274	0.763206	1	0.511811
CR_08550W_A	15.2601	-0.416884	1.25535	-0.332085	0.739825	1	0.668426
C2_03070C_A	9.39717	-0.41636	1.62973	-0.255478	0.798354	1	0.511811
C7_03860W_A	218.272	-0.415752	0.373848	-1.11209	0.266101	1	2.01181
C1_11540C_A	101.951	-0.415047	0.504762	-0.822262	0.410928	1	2.93744
C1_10280C_A	28.1921	-0.414382	0.93763	-0.441946	0.658528	1	2.92919
C2_04760W_A	35.1407	-0.414191	0.895489	-0.46253	0.643701	1	2.01181
C5_03260C_A	14.1088	-0.413736	1.30235	-0.317684	0.750725	1	0.511811
C1_02110C_A	357.087	-0.413623	0.33859	-1.22161	0.221857	1	2.93744
C3_06550C_A	13.0825	-0.412919	1.41745	-0.291311	0.770814	1	0.668426
CR_08410W_A	4.25327	-0.412907	2.49732	-0.16534	0.868677	1	0.668426
C5_03070W_A	79.1649	-0.412051	0.575829	-0.715579	0.474251	1	2.93744
CR_04570C_A	50.2191	-0.411441	0.720358	-0.571161	0.56789	1	2.88804
CR_02040W_A	29.9593	-0.411351	0.915082	-0.449523	0.653054	1	2.93744
CR_00540C_A	44.9165	-0.410547	0.752059	-0.545897	0.585137	1	2.92919
CR_06540W_A	15.0841	-0.409918	1.27943	-0.32039	0.748672	1	0.0813911
C4_04890C_A	55.3536	-0.408161	0.770914	-0.529451	0.596493	1	2.01181
C3_02500W_A	4.37699	-0.40812	2.67248	-0.152712	0.878625	1	0
C7_00210C_A	17.5741	-0.4075	1.23642	-0.329581	0.741717	1	0.668426
C2_05610C_A	96.8411	-0.407222	0.530342	-0.767848	0.442578	1	2.88804
C1_13710C_A	1.07862	-0.406412	4.79671	-0.0847271	0.932478	1	0.511811
C2_05450C_A	1.07862	-0.406412	4.79671	-0.0847271	0.932478	1	0.668426
C1_02800W_A	1.07862	-0.406412	4.79671	-0.0847271	0.932478	1	0.511811
C1_07570C_A	1.07862	-0.406412	4.79671	-0.0847271	0.932478	1	0
C3_05040C_A	9.37231	-0.406346	1.59861	-0.254187	0.799351	1	0.668426
CR_10570C_A	15.3124	-0.406217	1.26968	-0.319937	0.749016	1	0.0524941
C4_05390W_A	21.7229	-0.405649	1.10317	-0.367714	0.713087	1	1.66843
CR_10200W_A	17.7222	-0.405288	1.39091	-0.291383	0.770759	1	0.668426
C2_01310W_A	9.5036	-0.404523	1.68092	-0.240656	0.809822	1	0.0274261
C3_00550C_A	43.588	-0.403878	0.760143	-0.531319	0.595198	1	2.93744
C7_02170C_A	19.6702	-0.403503	1.1367	-0.354979	0.722605	1	1.66843
C1_04950C_A	9.39908	-0.401909	1.56731	-0.256433	0.797617	1	0.668426
C1_11400C_A	61.2393	-0.40127	0.655241	-0.6124	0.540273	1	2.93744
C2_01350C_A	18.3845	-0.401217	1.16625	-0.344022	0.730829	1	2.92919
C2_03010C_A	343.655	-0.400913	0.330569	-1.2128	0.225208	1	2.01181
C5_00270W_A	107.639	-0.400785	0.564927	-0.709447	0.478047	1	2.01181
C4_07180W_A	76.3688	-0.400575	0.584596	-0.685216	0.493208	1	2.93744
C1_03690W_A	13.9839	-0.400274	1.30164	-0.307515	0.758451	1	0.511811
C1_04890W_A	38.5097	-0.399503	0.859035	-0.465061	0.641888	1	2.01181
CR_01900C_A	12.3455	-0.399446	1.39825	-0.285677	0.775126	1	0.668426
C2_10220C_A	6.0676	-0.397633	2.35425	-0.1689	0.865875	1	0.0813911
C5_01390C_A	5.15593	-0.397522	2.42962	-0.163615	0.870035	1	0
C7_04210C_A	20.0833	-0.397243	1.12553	-0.352938	0.724135	1	2.93744
C7_00570W_A	14.3204	-0.396959	1.34288	-0.295602	0.767534	1	0.511811
C2_01840C_A	5.68383	-0.396145	2.41326	-0.164153	0.869611	1	0.0524941
CR_03210C_A	2.45815	-0.395259	3.39613	-0.116385	0.907347	1	0
C1_12140W_A	2.45815	-0.395259	3.39613	-0.116385	0.907347	1	0.668426
C2_03270W_A	243.597	-0.394919	0.34832	-1.13378	0.256886	1	2.01181
C4_05090C_A	14.0872	-0.394245	1.30876	-0.301236	0.763235	1	0.0274261
C1_09290C_A	124.343	-0.394209	0.470183	-0.838416	0.401797	1	1.66843
C1_11610C_A	4.9163	-0.392152	2.55251	-0.153634	0.877898	1	0.511811
CR_09580C_A	32.4843	-0.391267	0.88502	-0.4421	0.658417	1	2.01181
CR_04740C_A	69.621	-0.391191	0.6445	-0.606968	0.543872	1	2.93744
C2_07900W_A	148.312	-0.389822	0.473675	-0.822973	0.410523	1	2.92919
C6_02760W_A	2.07438	-0.38942	3.65485	-0.106549	0.915147	1	0
CR_06120W_A	2.07438	-0.38942	3.65485	-0.106549	0.915147	1	0
CR_03800C_A	2.07438	-0.38942	3.65485	-0.106549	0.915147	1	0
C3_07910W_A	4.25013	-0.388845	2.47264	-0.157259	0.875041	1	0
C7_03420C_A	12.9881	-0.38823	1.34493	-0.288661	0.772841	1	0.511811
C3_07470W_A	28.7577	-0.3877	0.968032	-0.400503	0.688786	1	2.92919
C1_08490W_A	20.4951	-0.387145	1.12921	-0.342847	0.731714	1	1.66843
C1_13270W_A	9.44883	-0.386571	2.00968	-0.192354	0.847465	1	0.0274261
CR_07620W_A	51.1122	-0.385928	0.704409	-0.547875	0.583778	1	1.66843
C3_00720W_A	224.403	-0.385828	0.385866	-0.999902	0.317358	1	2.92919
C1_13010W_A	10.9137	-0.384597	1.46633	-0.262286	0.793101	1	0.0274261
C4_06570C_A	1028.8	-0.384594	0.233004	-1.65059	0.0988232	1	2.01181
C2_02170W_A	13.245	-0.384558	1.32883	-0.289396	0.772278	1	0.0274261
CR_07010W_A	76.5517	-0.384025	0.595117	-0.645292	0.518738	1	2.88804
C4_05240C_A	97.5529	-0.383177	0.550265	-0.696351	0.486209	1	2.93744
C4_06050W_A	8.40332	-0.382754	1.66593	-0.229754	0.818283	1	0.0524941
C5_01320W_A	37.9833	-0.382728	0.894961	-0.427648	0.668908	1	1.66843
C1_07840W_A	31.3094	-0.382202	0.894027	-0.427506	0.669011	1	2.93744
C5_04410C_A	13.7078	-0.38197	1.38467	-0.275857	0.782658	1	0.0524941
CR_09370W_A	37.1665	-0.381938	0.936	-0.408053	0.683234	1	2.92919
C1_04390C_A	15.519	-0.381846	1.29562	-0.294721	0.768207	1	0.511811
C2_10350C_A	41.2548	-0.379488	0.78447	-0.483751	0.628562	1	2.93744
C3_01490W_A	56.9312	-0.378529	0.664004	-0.57007	0.56863	1	2.88804
C1_00760W_A	19.0397	-0.377832	1.15862	-0.326106	0.744344	1	2.01181
C3_05850W_A	15.7319	-0.377612	1.22575	-0.308066	0.758032	1	0.668426
CR_10680W_A	109.989	-0.376492	0.523776	-0.718804	0.472262	1	2.88804
C1_04190C_A	4.89081	-0.37459	2.3068	-0.162385	0.871003	1	0
C6_04360C_A	13.2992	-0.374419	1.33087	-0.281333	0.778455	1	0.668426
C5_00100C_A	42.8689	-0.374236	0.776827	-0.481749	0.629984	1	2.92919
C2_09590C_A	6.81599	-0.374219	1.85791	-0.20142	0.84037	1	0.511811
C4_07060W_A	31.6587	-0.373404	0.975035	-0.382964	0.701746	1	2.88804
C5_01140C_A	8.45306	-0.372811	2.08786	-0.178562	0.858282	1	0.668426
C2_10250C_A	8.45306	-0.372811	2.08786	-0.178562	0.858282	1	0.0274261
C3_01100W_A	4.68807	-0.372366	2.60079	-0.143174	0.886153	1	0
C2_02710C_A	2.99746	-0.372199	3.12155	-0.119236	0.905089	1	0
C6_03830W_A	62.2815	-0.371366	0.65644	-0.565727	0.571579	1	2.88804
C5_00500W_A	37.9807	-0.370063	0.813087	-0.455133	0.649014	1	1.66843
C1_10760W_A	4.3043	-0.368009	2.69064	-0.136773	0.89121	1	0
CR_06590C_A	32.8751	-0.36726	0.885018	-0.414975	0.67816	1	2.92919
C6_01650C_A	41.3663	-0.367004	0.781209	-0.469789	0.638506	1	2.88804
C3_03110W_A	0.694852	-0.366973	4.80683	-0.0763441	0.939145	1	0
C6_04490W_A	0.694852	-0.366973	4.80683	-0.0763441	0.939145	1	0
CR_09900C_A	0.694852	-0.366973	4.80683	-0.0763441	0.939145	1	0
C1_00090W_A	0.694852	-0.366973	4.80683	-0.0763441	0.939145	1	0
CR_08580C_A	0.694852	-0.366973	4.80683	-0.0763441	0.939145	1	0
C3_00430W_A	0.694852	-0.366973	4.80683	-0.0763441	0.939145	1	0
C4_00460C_A	19.4292	-0.364559	1.14332	-0.318861	0.749832	1	2.88804
C4_03830W_A	2.61369	-0.364391	3.30868	-0.110132	0.912305	1	0
C3_00650W_A	638.577	-0.362855	0.238114	-1.52387	0.12754	0.983666	2.92919
C2_01440C_A	3.92054	-0.362559	2.7939	-0.129768	0.89675	1	0.668426
C5_01970C_A	69.9734	-0.36208	0.604043	-0.599427	0.548888	1	1.66843
C2_00190C_A	18.276	-0.361496	1.15345	-0.313405	0.753973	1	0.0813911
C4_02340W_A	83.5091	-0.361395	0.55644	-0.649477	0.51603	1	1.66843
C3_03730C_A	16.8678	-0.360111	1.21236	-0.297034	0.766441	1	0.0813911
CR_04260W_A	1.46239	-0.358785	4.26464	-0.0841301	0.932953	1	0
C1_09960W_A	1.46239	-0.358785	4.26464	-0.0841301	0.932953	1	0
C3_06110C_A	46.1571	-0.357791	0.763934	-0.468354	0.639531	1	2.01181
C1_04740W_A	4.84361	-0.356218	2.56768	-0.138732	0.889662	1	0.511811
C3_06850W_A	4.84361	-0.356218	2.56768	-0.138732	0.889662	1	0.668426
CR_05460W_A	3.53677	-0.355944	2.91402	-0.122149	0.902781	1	0.511811
C2_00650W_A	3.53677	-0.355944	2.91402	-0.122149	0.902781	1	0.511811
C5_03110C_A	3.53677	-0.355944	2.91402	-0.122149	0.902781	1	0
C7_01640W_A	182.182	-0.355505	0.418319	-0.849844	0.395412	1	2.93744
C1_07700C_A	49.2756	-0.355133	0.75452	-0.470674	0.637873	1	1.66843
C4_04110W_A	1.33553	-0.354056	4.13233	-0.0856794	0.931721	1	0
C4_05800C_A	3.79682	-0.353794	2.65872	-0.133069	0.894138	1	0
C3_04000C_A	2.22992	-0.353758	3.54203	-0.0998742	0.920444	1	0.511811
C1_00900W_A	2.22992	-0.353758	3.54203	-0.0998742	0.920444	1	0
C1_14090W_A	2.22992	-0.353758	3.54203	-0.0998742	0.920444	1	0
C1_10500W_A	2.22992	-0.353758	3.54203	-0.0998742	0.920444	1	0.511811
C7_03540C_A	2.22992	-0.353758	3.54203	-0.0998742	0.920444	1	0
C7_01680C_A	51.6012	-0.353301	0.696519	-0.507238	0.611988	1	2.88804
C2_02370C_A	35.2377	-0.353043	0.886455	-0.398264	0.690435	1	2.93744
C3_05830W_A	25.6421	-0.351287	1.04324	-0.336727	0.736323	1	2.88804
CR_09980W_A	45.4098	-0.350029	0.766506	-0.456655	0.647919	1	2.88804
C5_02470W_A	52.1098	-0.349985	2.52152	-0.138799	0.889609	1	2.92919
CR_00830W_A	1.23416	-0.347162	4.59318	-0.0755821	0.939752	1	0
C1_03980W_A	1.23416	-0.347162	4.59318	-0.0755821	0.939752	1	0.511811
CR_05480W_A	16.4841	-0.346099	1.21276	-0.28538	0.775353	1	0.0524941
C1_05890W_A	36.3112	-0.34419	0.899734	-0.382547	0.702056	1	2.92919
CR_03160W_A	9.28049	-0.34371	1.71278	-0.200673	0.840954	1	0.668426
C3_05110W_A	7.47902	-0.342669	1.94035	-0.176601	0.859822	1	0.0524941
C6_04600W_A	521.922	-0.342461	0.258702	-1.32376	0.185582	1	1.66843
CR_04950W_A	12.8714	-0.341545	1.34798	-0.253375	0.799979	1	0.668426
C5_04000W_A	12.2307	-0.341195	1.38428	-0.246478	0.805312	1	0.511811
C4_03020W_A	37.762	-0.340974	0.850473	-0.400923	0.688477	1	2.88804
CR_02110W_A	17.9248	-0.340719	1.18592	-0.287303	0.77388	1	0.0813911
C2_02260W_A	10.9328	-0.340201	1.68853	-0.201477	0.840325	1	0.511811
CR_03070W_A	7.79639	-0.338675	1.80816	-0.187304	0.851423	1	0.511811
C2_09380W_A	1.84616	-0.338593	3.84646	-0.0880272	0.929855	1	0.511811
C1_04550W_A	1.84616	-0.338593	3.84646	-0.0880272	0.929855	1	0.511811
C2_03820C_A	54.1646	-0.33831	0.719565	-0.470159	0.638241	1	1.66843
C2_08970C_A	9.46151	-0.337498	1.59434	-0.211685	0.832353	1	0.0274261
C5_00680W_A	2.76923	-0.337037	3.22824	-0.104403	0.91685	1	0.511811
CR_07080W_A	39.0453	-0.334505	0.840165	-0.398142	0.690526	1	2.01181
C1_01480C_A	84.7625	-0.333836	0.570833	-0.584822	0.558667	1	2.93744
C1_12550C_A	17.6965	-0.333802	1.19115	-0.280234	0.779298	1	0.511811
C1_07890C_A	35.0093	-0.333623	0.876559	-0.380606	0.703496	1	2.88804
C3_02110W_A	78.2761	-0.332987	0.594214	-0.560382	0.575219	1	2.92919
C2_05140W_A	19.3157	-0.332819	1.15418	-0.288358	0.773072	1	2.01181
C7_03030W_A	22.4413	-0.332165	1.04944	-0.316517	0.75161	1	1.66843
C3_00750W_A	11.1808	-0.331979	1.4556	-0.228069	0.819592	1	0.0524941
C2_03560C_A	8.43707	-0.331885	1.7074	-0.19438	0.845878	1	0.0813911
C7_00020C_A	52.5916	-0.330206	0.726659	-0.454417	0.649529	1	2.01181
CR_01630C_A	14.3408	-0.329784	1.3444	-0.245302	0.806223	1	0.511811
C4_01360W_A	379.146	-0.329736	0.301441	-1.09387	0.274014	1	1.66843
C2_07330W_A	60.4831	-0.328304	0.655399	-0.500923	0.616425	1	2.88804
C7_01800C_A	129.7	-0.328205	0.452696	-0.725002	0.468451	1	2.01181
C3_07150C_A	58.8443	-0.328042	0.701187	-0.467837	0.639901	1	2.93744
C1_09640W_A	51.8423	-0.327852	0.798547	-0.41056	0.681395	1	2.01181
CR_04010C_A	4.23162	-0.326563	2.70931	-0.120533	0.904061	1	0.668426
C5_01130W_A	4.23162	-0.326563	2.70931	-0.120533	0.904061	1	0
C1_12230W_A	60.9257	-0.32586	0.712195	-0.457543	0.647281	1	2.92919
CR_07310W_A	12.232	-0.325687	1.52505	-0.213558	0.830892	1	0.0813911
C1_00110W_A	26.6544	-0.325415	0.982772	-0.33112	0.740554	1	2.01181
C2_00340C_A	101.146	-0.324123	0.526505	-0.615613	0.53815	1	2.01181
C1_12420C_A	0.155542	-0.322476	4.85694	-0.0663949	0.947063	1	0
CR_08760C_A	0.155542	-0.322476	4.85694	-0.0663949	0.947063	1	0
C6_01540C_A	0.155542	-0.322476	4.85694	-0.0663949	0.947063	1	0
C5_01330W_A	0.155542	-0.322476	4.85694	-0.0663949	0.947063	1	0
C3_00820W_A	19.3381	-0.322099	1.14254	-0.281914	0.778009	1	2.88804
C3_06820C_A	18.7242	-0.320605	1.13707	-0.281958	0.777975	1	2.88804
C6_04260C_A	8.31021	-0.32052	1.74529	-0.183649	0.854289	1	0.0813911
C1_11250W_A	20.2017	-0.320355	1.19712	-0.267606	0.789003	1	2.88804
C7_02810W_A	56.7373	-0.318354	0.677682	-0.469769	0.63852	1	2.01181
C2_03290W_A	14.775	-0.318255	1.27072	-0.250452	0.802238	1	0.0524941
C1_05380C_A	25.3724	-0.318157	1.00757	-0.315766	0.75218	1	2.01181
CR_01330W_A	129.491	-0.317631	0.465375	-0.682527	0.494906	1	2.01181
C2_09420W_A	62.3418	-0.317562	0.699509	-0.453978	0.649845	1	1.66843
C3_00940W_A	22.0607	-0.316865	1.06863	-0.296515	0.766837	1	2.88804
C3_04630W_A	8.1585	-0.316058	1.68901	-0.187126	0.851562	1	0.0813911
C3_04430W_A	26.0641	-0.315459	0.963825	-0.327299	0.743442	1	2.88804
C4_00880W_A	8.59453	-0.315215	1.65311	-0.190681	0.848776	1	0.0274261
C2_08020C_A	25.7817	-0.314358	0.973452	-0.322931	0.746748	1	2.93744
C3_00400C_A	10.9545	-0.314192	1.4534	-0.216178	0.828849	1	0.668426
C1_03770W_A	21.4437	-0.313859	1.11071	-0.282574	0.777503	1	2.93744
C3_03420C_A	191.184	-0.313731	0.390312	-0.803794	0.421516	1	1.66843
C2_08140C_A	129.625	-0.313131	0.486836	-0.643197	0.520096	1	2.92919
C1_08480C_A	2.92478	-0.312611	3.1546	-0.0990968	0.921061	1	0
C2_05660W_A	205.988	-0.311016	0.380886	-0.816558	0.414181	1	1.66843
C1_06230C_A	6.77263	-0.310871	2.26057	-0.137519	0.89062	1	0.668426
C6_00510C_A	4.38716	-0.310493	2.67056	-0.116265	0.907442	1	0
CR_03030C_A	103.676	-0.310318	0.500998	-0.6194	0.535653	1	2.92919
C1_00640C_A	22.1168	-0.308318	1.04365	-0.295424	0.76767	1	2.93744
C1_12370W_A	51.2383	-0.308255	0.747816	-0.412207	0.680188	1	2.88804
C7_03180C_A	72.0414	-0.307869	0.599639	-0.513424	0.607655	1	2.93744
C1_14110C_A	76.5593	-0.307299	0.629126	-0.488454	0.625228	1	1.66843
C4_01860C_A	12.9581	-0.30697	1.39605	-0.219885	0.825961	1	0.511811
C1_00890W_A	11.5461	-0.305988	1.42557	-0.214642	0.830047	1	0.668426
C1_13330C_A	19.1385	-0.305661	1.14619	-0.266676	0.789719	1	2.01181
CR_03250C_A	4.92647	-0.305145	2.55099	-0.119618	0.904786	1	0
C1_06840C_A	3.82045	-0.304937	2.75503	-0.110684	0.911867	1	0.511811
C7_00660W_A	175.764	-0.303868	0.406766	-0.747034	0.455043	1	2.01181
C3_05460W_A	2.0017	-0.30301	3.71249	-0.0816191	0.93495	1	0.511811
C1_05420W_A	2.0017	-0.30301	3.71249	-0.0816191	0.93495	1	0
C3_00510W_A	2.0017	-0.30301	3.71249	-0.0816191	0.93495	1	0
C5_04810W_A	82.7982	-0.302935	0.564173	-0.536954	0.591299	1	2.01181
C1_07410C_A	48.812	-0.302646	0.726834	-0.416389	0.677125	1	1.66843
C5_02530W_A	12.0382	-0.30098	1.43998	-0.209017	0.834435	1	0.668426
CR_06000W_A	29.7717	-0.299906	0.920089	-0.325953	0.74446	1	2.93744
C3_07390C_A	4.0034	-0.299747	2.77069	-0.108185	0.913849	1	0
C1_05670W_A	45.5232	-0.299622	0.750104	-0.399441	0.689569	1	2.01181
C7_01230C_A	9.46855	-0.299135	1.58012	-0.189312	0.849849	1	0.0524941
C2_09870W_A	13.3195	-0.297898	1.33145	-0.22374	0.822959	1	0.0274261
C7_03890C_A	41.734	-0.297649	0.790304	-0.376626	0.706452	1	2.88804
C5_03510C_A	11.9018	-0.297426	1.65365	-0.17986	0.857263	1	0.0813911
C1_10100C_A	23.9182	-0.297262	1.30427	-0.227915	0.819712	1	1.66843
C2_00320W_A	18.7337	-0.296569	1.19738	-0.247681	0.804381	1	2.01181
C4_03720C_A	14.2942	-0.295518	1.49017	-0.198312	0.842801	1	0.0813911
C2_07760W_A	6.5444	-0.29404	2.28944	-0.128433	0.897806	1	0.0274261
C1_08670W_A	20.5837	-0.293932	1.0787	-0.272486	0.785248	1	2.93744
C2_10210C_A	41.7794	-0.293565	0.775114	-0.378738	0.704882	1	1.66843
C3_07630C_A	12.9358	-0.292538	1.34931	-0.216806	0.828359	1	0.0274261
C3_04470W_A	60.9401	-0.291173	0.66146	-0.440198	0.659794	1	2.88804
CR_10420W_A	11.0354	-0.290226	1.46699	-0.197839	0.843171	1	0.0524941
C1_10350C_A	45.728	-0.28875	0.773398	-0.373352	0.708886	1	1.66843
C1_02750C_A	50.1438	-0.287807	0.731939	-0.393212	0.694163	1	2.93744
C5_05160C_A	14.0686	-0.28775	1.32082	-0.217857	0.82754	1	0.0524941
C5_00220W_A	18.6872	-0.287628	1.14071	-0.252147	0.800927	1	2.88804
C4_04430W_A	14.1699	-0.287238	1.2964	-0.221566	0.824651	1	0.511811
C2_06780C_A	3.61963	-0.286752	2.8869	-0.0993285	0.920877	1	0
CR_09410W_A	23.8661	-0.285654	1.07828	-0.264917	0.791073	1	2.88804
CR_07650W_A	50.8321	-0.284515	0.712161	-0.399509	0.689518	1	2.01181
C3_03790W_A	6.69995	-0.28411	2.26975	-0.125172	0.900387	1	0.0524941
C2_06300W_A	4.15894	-0.283823	2.72851	-0.104021	0.917152	1	0.668426
C6_04480C_A	9.42833	-0.283761	1.79883	-0.157748	0.874655	1	0.668426
C1_02820W_A	87.1389	-0.282738	0.603938	-0.468158	0.639672	1	1.66843
C3_01930W_A	28.1844	-0.282369	0.9376	-0.301161	0.763292	1	2.92919
CR_02820W_A	99.8158	-0.281722	0.538843	-0.522828	0.601094	1	2.01181
C3_05450C_A	1.00594	-0.28158	4.79784	-0.058689	0.9532	1	0
C1_13380W_A	1.00594	-0.28158	4.79784	-0.058689	0.9532	1	0.511811
C7_04120W_A	1.00594	-0.28158	4.79784	-0.058689	0.9532	1	0
C2_07890W_A	9.78026	-0.28147	1.98749	-0.141621	0.887379	1	0.0274261
C2_01530C_A	21.4921	-0.280056	1.12335	-0.249304	0.803125	1	2.92919
C4_07120C_A	36.2293	-0.279842	0.844848	-0.331234	0.740468	1	2.01181
C2_10100W_A	6.87843	-0.278399	1.89188	-0.147155	0.88301	1	0.0813911
CR_03700C_A	13.4471	-0.277222	1.59236	-0.174095	0.861791	1	0.0274261
CR_08570W_A	31.9697	-0.275876	0.899662	-0.306644	0.759115	1	2.88804
C6_02240C_A	103.574	-0.275213	0.546929	-0.503197	0.614826	1	2.92919
CR_04480C_A	787.091	-0.27426	0.242821	-1.12947	0.258698	1	2.01181
C1_08210C_A	79.3736	-0.273881	0.587817	-0.46593	0.641266	1	2.92919
C3_06200C_A	2.15724	-0.272564	3.59353	-0.0758484	0.93954	1	0
C2_09530W_A	2.69655	-0.271572	3.26533	-0.0831683	0.933718	1	0.511811
C1_02090C_A	11.3191	-0.271364	1.65811	-0.163659	0.87	1	0.0813911
C3_05420W_A	3.23586	-0.270657	3.02346	-0.089519	0.928669	1	0.668426
C4_01410W_A	40.1569	-0.270322	0.798528	-0.338525	0.734967	1	2.88804
C4_07100C_A	28.8702	-0.270276	0.97983	-0.275839	0.782671	1	2.01181
CR_05310W_A	6.88732	-0.269761	2.02625	-0.133134	0.894088	1	0.511811
C1_06580W_A	79.7005	-0.269661	0.570046	-0.473052	0.636176	1	2.01181
C1_00930C_A	48.8139	-0.269591	0.717249	-0.375867	0.707015	1	2.92919
C2_00420W_A	4.31448	-0.26905	2.68872	-0.100066	0.920292	1	0
C4_03180W_A	121.093	-0.266169	0.500489	-0.531818	0.594852	1	2.88804
C2_04420W_A	1.3897	-0.265875	4.35841	-0.0610028	0.951357	1	0.511811
C4_00920C_A	1.3897	-0.265875	4.35841	-0.0610028	0.951357	1	0
C2_02430W_A	1.3897	-0.265875	4.35841	-0.0610028	0.951357	1	0.511811
C1_12310C_A	1.3897	-0.265875	4.35841	-0.0610028	0.951357	1	0.668426
C2_00850W_A	7.01103	-0.265563	2.23249	-0.118954	0.905312	1	0.0813911
C5_02840C_A	47.6096	-0.265354	0.726981	-0.365008	0.715105	1	2.88804
CR_07070C_A	12.0102	-0.265343	4.46354	-0.0594467	0.952596	1	0.0813911
C1_14290C_A	145.611	-0.264724	0.496351	-0.533341	0.593798	1	2.01181
C6_03380W_A	23.5863	-0.264669	1.08604	-0.2437	0.807463	1	1.66843
C1_00070W_A	36.4422	-0.264067	0.831213	-0.317689	0.750721	1	2.92919
C1_09540W_A	25.9607	-0.263481	1.29542	-0.203394	0.838827	1	2.01181
C1_04300C_A	111.399	-0.263134	0.511531	-0.514405	0.606969	1	2.01181
C1_08950W_A	63.1744	-0.262884	0.631016	-0.416604	0.676968	1	1.66843
C7_01330C_A	24.5494	-0.262849	0.997465	-0.263517	0.792152	1	2.92919
C2_00060C_A	17.8215	-0.262776	1.16183	-0.226174	0.821066	1	0.511811
CR_02000C_A	9.70758	-0.262753	1.99259	-0.131865	0.895091	1	0.511811
C3_06870W_A	2560.07	-0.262259	0.181669	-1.44361	0.148849	1	2.88804
C1_14310W_A	11.453	-0.261793	1.47264	-0.177771	0.858903	1	0.511811
C6_02730W_A	94.1305	-0.260384	0.539664	-0.482492	0.629457	1	2.01181
C3_01940C_A	33.3843	-0.259534	0.862673	-0.300849	0.76353	1	2.93744
C5_02390C_A	6.93452	-0.259409	1.80982	-0.143334	0.886026	1	0.668426
C3_01280W_A	12.689	-0.258465	1.37912	-0.187413	0.851337	1	0.511811
C3_07200C_A	14.0463	-0.256416	1.32905	-0.192931	0.847013	1	0.0813911
C5_04640C_A	59.1474	-0.255999	0.654916	-0.390889	0.69588	1	2.92919
C3_00710W_A	50.2355	-0.255974	0.708078	-0.361506	0.717721	1	2.01181
C1_00080C_A	4.47002	-0.255306	2.65111	-0.0963016	0.923281	1	0
C1_03730C_A	25.8957	-0.255065	1.00133	-0.254727	0.798934	1	2.93744
C3_03280C_A	62.3099	-0.254837	0.654749	-0.389214	0.697118	1	2.88804
C3_02160C_A	33.798	-0.253532	0.871965	-0.290759	0.771236	1	2.92919
C2_00380C_A	46.6445	-0.253191	0.730851	-0.346433	0.729017	1	2.01181
C4_00890W_A	100.527	-0.25304	0.515378	-0.490979	0.623441	1	1.66843
CR_08920W_A	12.5099	-0.252903	1.37185	-0.184352	0.853737	1	0.668426
CR_10260W_A	3.3914	-0.25258	2.96498	-0.0851878	0.932112	1	0.668426
C6_04590C_A	489.534	-0.252432	0.283098	-0.891678	0.372566	1	2.93744
C3_00290W_A	37.7031	-0.251946	0.955465	-0.263689	0.792019	1	2.01181
C3_07260C_A	23.9514	-0.251112	1.06887	-0.234932	0.814262	1	2.88804
C7_00960W_A	59.0162	-0.251036	0.675011	-0.371899	0.709968	1	2.88804
CR_08480C_A	16.746	-0.251016	1.20502	-0.208308	0.834988	1	0.511811
C1_05940W_A	37.5534	-0.250041	0.817333	-0.305923	0.759663	1	2.88804
C7_03270W_A	13.2048	-0.249366	1.34246	-0.185752	0.852639	1	0.511811
C1_08700W_A	64.1279	-0.24685	0.64088	-0.385173	0.700109	1	2.92919
C6_02430W_A	25.0779	-0.246381	1.05851	-0.232762	0.815946	1	2.01181
C2_02210C_A	7.57205	-0.245949	1.92363	-0.127857	0.898262	1	0.0524941
C6_04650W_A	81.3603	-0.245617	0.576613	-0.425965	0.670133	1	2.88804
C4_00910C_A	12.9205	-0.245213	1.3525	-0.181304	0.856129	1	0.511811
C1_07970C_A	35.0417	-0.244993	0.872219	-0.280885	0.778799	1	2.01181
[truncated: 3,738 more rows]

## Sheet: ste11- vs. WT-
	baseMean	log2FoldChange	lfcSE	stat	pvalue	padj	weight
CR_05270W_A	1.70855	-5.91107	3.06965	-1.92565	0.0541487	0.450675	0.563951
CR_07900C_A	1.70855	-5.91107	3.06965	-1.92565	0.0541487	0.603546	0.267755
C1_07580C_A	1.70855	-5.91107	3.06965	-1.92565	0.0541487	0.603546	0.267755
C6_03170C_A	126.949	-5.76138	1.54236	-3.73543	0.000187394	0.0414165	0.956414
C1_05690C_A	2.29108	-5.17224	2.41668	-2.14022	0.0323368	1	0.0455872
C6_01310W_A	2.30931	-4.93796	2.57362	-1.91868	0.0550248	0.453454	0.563951
C4_02230C_A	2.32187	-4.83593	2.06473	-2.34217	0.0191721	0.307823	0.563951
C4_03760W_A	2.33788	-4.83091	2.5952	-1.86148	0.0626766	1	0.0455872
C7_01770W_A	1.36245	-4.5403	2.2741	-1.99653	0.0458762	0.421097	0.563951
CR_06310W_A	1.88887	-4.19557	2.17406	-1.92983	0.0536278	1	0.0469057
C4_06910W_A	2.47138	-4.16834	2.7222	-1.53124	0.12571	0.843637	0.267755
C4_06970C_A	2.9178	-4.06374	1.61537	-2.51568	0.0118804	0.6546	0.0469057
C3_05670C_A	0.577328	-3.74704	3.62715	-1.03305	0.30158	1	0.267755
C6_04070C_A	0.966118	-3.63487	3.24315	-1.12078	0.26238	1	0.0455872
C1_07610C_A	8.60108	-3.46954	0.893077	-3.88493	0.000102359	0.0555632	0.267755
C6_02620C_A	4.9839	-3.42719	1.78708	-1.91776	0.0551418	1	0.0455872
CR_01250C_A	1.03177	-3.27392	2.57872	-1.26959	0.20423	0.75807	0.563951
C3_00990C_A	2.14457	-3.26011	1.72515	-1.88975	0.0587908	0.623707	0.267755
C7_01880C_A	2.08978	-3.18018	2.25173	-1.41232	0.157855	0.928519	0.267755
C5_03060C_A	8.10463	-3.0786	1.38147	-2.22849	0.0258476	0.346115	0.563951
C6_03500C_A	5.04287	-3.06585	1.2083	-2.53733	0.0111702	0.648548	0.0455872
CR_03840C_A	5.44695	-3.04322	1.82261	-1.66971	0.0949772	1	0.0419669
C7_02760W_A	2.83549	-3.03272	1.68866	-1.79593	0.0725053	1	0.0455872
CR_10200W_A	7.74512	-2.98973	1.18189	-2.52962	0.0114187	0.335965	0.267755
CR_08310C_A	2.38303	-2.9832	1.9647	-1.5184	0.128913	1	0.0469057
C1_05350W_A	46.3641	-2.84911	0.579225	-4.91882	8.7066e-07	0.00241723	0.976496
CR_04220C_A	3.14685	-2.83576	2.38925	-1.18688	0.235273	1	0.267755
C7_01050W_A	2.25755	-2.77502	2.2687	-1.22317	0.221264	1	0.0455872
C1_04010C_A	22.241	-2.77292	0.963836	-2.87696	0.00401525	0.138895	0.992938
C1_10150W_A	2.46039	-2.74331	1.53381	-1.78856	0.0736857	1	0.0469057
C4_01090C_A	11.1993	-2.71731	0.83055	-3.2717	0.00106904	0.0999146	0.563951
C7_02880C_A	3.24849	-2.71717	2.3956	-1.13423	0.256697	1	0.0455872
C6_02480W_A	200.591	-2.6986	0.574679	-4.69584	2.6551e-06	0.00271883	1.49658
C7_00770W_A	14.4628	-2.65582	1.21042	-2.19413	0.028226	0.936004	0.0469057
C3_04350C_A	6.86003	-2.6399	0.836262	-3.15678	0.00159519	0.168297	0.267755
C5_04020C_A	0.557815	-2.62813	3.14153	-0.836577	0.40283	1	0.267755
C1_07320W_A	1.19385	-2.61544	2.08552	-1.2541	0.209807	1	0.0455872
C7_02830C_A	3.30329	-2.59601	1.98916	-1.30507	0.191867	0.736683	0.563951
C3_02880W_A	5.27101	-2.58637	1.00433	-2.57521	0.010018	0.623944	0.0455872
C2_00990W_A	1.823	-2.57892	1.84587	-1.39713	0.162374	0.687829	0.563951
C6_01400W_A	5.94895	-2.55461	0.887875	-2.87722	0.00401201	0.428017	0.0469057
C4_04950W_A	9.32326	-2.53506	0.87502	-2.89715	0.00376574	0.422934	0.0455872
C3_06450W_A	2.51889	-2.5303	1.49519	-1.69229	0.0905904	0.734723	0.267755
C4_03100W_A	2.49043	-2.52388	1.76128	-1.43298	0.151864	1	0.0455872
C3_02900W_A	9.23503	-2.4993	1.58554	-1.57631	0.114955	1	0.0419669
C3_05330C_A	9.69564	-2.44917	0.815278	-3.00409	0.00266377	0.388207	0.0419669
C7_02920W_A	3.24291	-2.43053	1.84201	-1.3195	0.187002	1	0.0455872
C3_05750C_A	1.91375	-2.3945	1.83223	-1.30688	0.191253	1	0.0469057
C7_02090C_A	21.3037	-2.37779	0.48202	-4.93296	8.09925e-07	0.00241723	1.26776
CR_01010W_A	3.43513	-2.3465	1.86784	-1.25626	0.209021	0.761927	0.563951
C2_10070W_A	8.60249	-2.34324	1.58523	-1.47817	0.139362	1	0.0419669
C6_02950C_A	3.31908	-2.34251	1.44241	-1.62403	0.10437	1	0.0455872
C3_04170W_A	8.17643	-2.33555	0.787201	-2.9669	0.0030082	0.392217	0.0455872
C1_05890W_A	1.29029	-2.3071	2.00643	-1.14985	0.250205	1	0.0419669
C3_03460C_A	2.71571	-2.30409	1.45501	-1.58356	0.113294	0.805141	0.267755
C3_00590W_A	3.86457	-2.30288	1.09837	-2.09664	0.0360258	1	0.0469057
C2_07240C_A	2.67509	-2.28601	1.98385	-1.15231	0.249195	1	0.0469057
C2_05880W_A	4.12589	-2.26968	1.00488	-2.25865	0.023905	0.881878	0.0455872
C1_01180C_A	3.44571	-2.26546	1.91603	-1.18237	0.237059	1	0.0469057
C4_06260W_A	15.8073	-2.25168	0.888044	-2.53555	0.0112272	0.253017	0.563951
CR_01340W_A	2.90557	-2.24835	2.13955	-1.05085	0.293327	1	0.267755
C3_05810C_A	18.77	-2.24818	0.962956	-2.33467	0.0195608	0.311108	0.563951
C2_04070C_A	1.9936	-2.23837	1.99174	-1.12383	0.261085	1	0.0469057
C2_05990C_A	2.73352	-2.22814	2.36308	-0.942896	0.345734	1	0.267755
C1_02800W_A	6.2522	-2.21904	1.17764	-1.88431	0.0595232	1	0.0419669
C6_00630W_A	2.71411	-2.18206	1.73767	-1.25574	0.209211	1	0.0469057
CR_05020W_A	11.2114	-2.17403	0.75676	-2.87281	0.00406835	0.435906	0.0455872
C7_02290W_A	4.97114	-2.16279	1.20211	-1.79916	0.0719931	1	0.0419669
C2_04390W_A	6.9607	-2.11259	0.995074	-2.12305	0.0337499	0.378199	0.563951
C3_02360C_A	8.723	-2.08362	0.966364	-2.15614	0.0310724	0.991042	0.0455872
C2_04810W_A	2.81461	-2.07487	1.77938	-1.16607	0.243588	1	0.267755
C1_01990W_A	6.85185	-2.06598	1.02043	-2.02462	0.0429062	0.410502	0.563951
C4_02080W_A	7.25231	-2.0511	1.28321	-1.59841	0.109951	1	0.0469057
C5_04850W_A	7.00068	-2.0469	0.980516	-2.08757	0.0368364	1	0.0455872
C1_00880W_A	26.2852	-2.03497	0.801389	-2.53931	0.0111073	0.204477	0.976496
C4_01470W_A	28.3024	-2.031	0.698337	-2.90834	0.0036335	0.138895	0.921892
C2_08170W_A	9.34403	-2.011	0.747427	-2.69057	0.00713306	0.277593	0.267755
C4_05870C_A	7.01785	-1.9751	0.962288	-2.0525	0.0401209	1	0.0455872
C1_13600W_A	5.5938	-1.96301	0.942525	-2.08271	0.0372776	1	0.0419669
C6_01500C_A	9.85614	-1.96005	0.910712	-2.15222	0.0313803	0.995547	0.0455872
C3_04200W_A	20.2376	-1.95537	0.657397	-2.97442	0.00293545	0.119987	0.976496
C3_05890W_A	30.4609	-1.94725	0.638985	-3.04742	0.00230816	0.108776	0.992938
CR_09420C_A	3.77876	-1.93043	1.41991	-1.35954	0.173975	1	0.0455872
C7_04160W_A	6.96066	-1.91984	1.15663	-1.65986	0.096943	1	0.0455872
CR_01810C_A	8.1721	-1.89976	1.15141	-1.64993	0.0989562	0.570323	0.563951
C4_05000W_A	13.4877	-1.86673	0.949298	-1.96643	0.0492486	1	0.0419669
CR_02940C_A	13.1274	-1.86377	0.752894	-2.47548	0.0133057	0.354605	0.267755
C6_01940W_A	11.3251	-1.86172	1.0068	-1.84914	0.0644382	1	0.0419669
C3_02510C_A	6.28086	-1.8498	0.976006	-1.89527	0.0580561	1	0.0455872
C5_00970W_A	0.055922	-1.8477	4.06867	-0.454128	0.649736	1	0.0469057
C1_06260W_A	0.055922	-1.8477	4.06867	-0.454128	0.649736	1	0.563951
C2_03580W_A	0.055922	-1.8477	4.06867	-0.454128	0.649736	1	0.0455872
C6_01730W_A	0.055922	-1.8477	4.06867	-0.454128	0.649736	1	0.563951
CR_02750C_A	0.055922	-1.8477	4.06867	-0.454128	0.649736	1	0.0469057
CR_00770W_A	0.055922	-1.8477	4.06867	-0.454128	0.649736	1	0.563951
C4_02190C_A	0.055922	-1.8477	4.06867	-0.454128	0.649736	1	0.0455872
C1_12300W_A	0.055922	-1.8477	4.06867	-0.454128	0.649736	1	0.0455872
C3_02250C_A	0.055922	-1.8477	4.06867	-0.454128	0.649736	1	0.0419669
C3_05480C_A	0.055922	-1.8477	4.06867	-0.454128	0.649736	1	0.267755
CR_06880C_A	0.055922	-1.8477	4.06867	-0.454128	0.649736	1	0.0455872
CR_01530C_A	0.055922	-1.8477	4.06867	-0.454128	0.649736	1	0.267755
CR_07550C_A	0.055922	-1.8477	4.06867	-0.454128	0.649736	1	0.563951
C3_04310C_A	0.055922	-1.8477	4.06867	-0.454128	0.649736	1	0.0455872
C6_03480W_A	38.6367	-1.8431	0.584102	-3.15544	0.00160254	0.0927023	0.976496
C1_05340C_A	70.6012	-1.82833	0.530254	-3.44803	0.000564685	0.0672305	0.971458
C1_11510C_A	32.965	-1.82664	0.473523	-3.85755	0.000114531	0.0294611	0.992938
C1_04140W_A	214.564	-1.82248	0.64614	-2.82057	0.00479383	0.110937	2.00674
C1_10240C_A	7.03869	-1.82221	1.17401	-1.55213	0.120631	0.617673	0.563951
C5_01620C_A	24.5649	-1.81692	0.586706	-3.09682	0.00195608	0.0918279	1.26776
C6_01600W_A	4.05592	-1.81555	1.28548	-1.41234	0.157849	1	0.0455872
C1_03840W_A	8.12172	-1.7985	0.969627	-1.85484	0.0636194	0.641293	0.267755
C7_01540W_A	3.56209	-1.79275	1.25045	-1.43368	0.151663	1	0.0469057
C4_04620C_A	41.6661	-1.79132	0.538936	-3.3238	0.000887985	0.0764825	0.921892
C7_03880C_A	13.6561	-1.78565	0.714126	-2.50047	0.0124027	0.675804	0.0455872
C1_04510W_A	13.2965	-1.78211	0.632597	-2.81713	0.00484556	0.464847	0.0469057
C4_05700W_A	16.6282	-1.76597	0.660409	-2.67405	0.00749407	0.284346	0.267755
C1_12980W_A	4.31786	-1.76017	1.03005	-1.70882	0.0874843	1	0.0469057
C4_06790W_A	44.6136	-1.7601	0.530076	-3.32047	0.000898655	0.0764825	0.921892
C2_03710W_A	0.819692	-1.75927	3.01756	-0.58301	0.559887	1	0.267755
C2_06800C_A	29.5993	-1.75532	0.55394	-3.16879	0.00153073	0.0851986	1.20398
C6_01070C_A	31.8482	-1.74834	0.71912	-2.43123	0.0150478	0.232962	0.992938
C2_01330C_A	21.1081	-1.7408	0.604306	-2.88066	0.00396846	0.139591	0.921892
C4_01740W_A	17.0836	-1.73229	0.85964	-2.01513	0.0438909	0.555342	0.267755
C2_00670C_A	0.0684778	-1.72962	4.06612	-0.425374	0.670564	1	0.267755
C1_14580C_A	0.0684778	-1.72962	4.06612	-0.425374	0.670564	1	0.267755
C6_01520W_A	0.0684778	-1.72962	4.06612	-0.425374	0.670564	1	0.0419669
C1_00280C_A	0.0684778	-1.72962	4.06612	-0.425374	0.670564	1	0.563951
C4_03970W_A	0.0684778	-1.72962	4.06612	-0.425374	0.670564	1	0.0455872
CR_00650W_A	0.0684778	-1.72962	4.06612	-0.425374	0.670564	1	0.267755
CR_10330W_A	0.0684778	-1.72962	4.06612	-0.425374	0.670564	1	0.563951
CR_01840W_A	0.0684778	-1.72962	4.06612	-0.425374	0.670564	1	0.0469057
CR_05090C_A	0.0684778	-1.72962	4.06612	-0.425374	0.670564	1	0.0469057
CR_09560C_A	10.3446	-1.72391	0.972565	-1.77254	0.0763057	1	0.0469057
C3_03190C_A	26.0064	-1.71815	0.52805	-3.25377	0.00113886	0.0824626	0.992938
C1_06210W_A	18.1323	-1.69499	0.549025	-3.08727	0.00202005	0.340389	0.0455872
C1_08190C_A	21.791	-1.68878	0.563996	-2.99431	0.00275067	0.103392	1.26776
C5_04490C_A	161.937	-1.68427	0.464163	-3.62861	0.00028495	0.0348175	2.00674
C6_02400W_A	1.7219	-1.67738	1.58626	-1.05745	0.290307	0.873891	0.563951
C3_05440C_A	22.6226	-1.67409	0.5086	-3.29156	0.00099632	0.076886	0.992938
C4_02750W_A	5.8552	-1.67407	1.10184	-1.51933	0.128679	1	0.0455872
C2_01760C_A	11.5729	-1.67288	0.938401	-1.78269	0.0746367	0.682864	0.267755
C5_01670W_A	4.10908	-1.67097	1.43741	-1.16248	0.245041	1	0.0419669
C6_04200C_A	13.6715	-1.64828	0.567223	-2.90587	0.00366236	0.414508	0.0469057
C1_03740W_A	39.2868	-1.63447	0.49769	-3.28412	0.00102302	0.0792846	0.976496
C2_01510C_A	19.0918	-1.63427	0.580096	-2.81724	0.00484382	0.464847	0.0469057
CR_04870C_A	40.7431	-1.63265	0.541426	-3.01546	0.00256586	0.103392	1.20398
CR_00790C_A	0.0810435	-1.62792	4.06405	-0.400567	0.688739	1	0.267755
C3_01340W_A	8.03251	-1.62179	0.913208	-1.77593	0.0757446	1	0.0455872
C4_04530C_A	190.698	-1.61793	0.497601	-3.25147	0.0011481	0.0760468	1.26776
C3_02570W_A	22.4359	-1.61377	0.881446	-1.83082	0.0671281	0.393706	0.992938
CR_00630W_A	23.8516	-1.61282	0.700498	-2.30239	0.0213132	0.268846	0.921892
C3_00510W_A	13.6952	-1.60966	0.684766	-2.35068	0.0187393	0.828414	0.0419669
C6_01010W_A	4.46267	-1.60403	1.19541	-1.34183	0.179652	0.982552	0.267755
C3_07880C_A	19.1943	-1.59173	0.602179	-2.64329	0.00821054	0.232237	0.563951
C1_13520C_A	19.2837	-1.59172	0.6442	-2.47084	0.0134796	0.687061	0.0469057
C3_04240C_A	0.179595	-1.59076	4.06333	-0.391492	0.695434	1	0.0419669
C2_06630C_A	72.4169	-1.58487	0.551724	-2.87257	0.00407145	0.134068	1.08811
C6_01200W_A	10.8451	-1.58223	0.810081	-1.95317	0.0507994	0.438049	0.563951
C3_03990C_A	4.15593	-1.57953	1.76375	-0.895552	0.370492	1	0.0469057
CR_10640W_A	21.9141	-1.57807	0.625712	-2.52204	0.0116677	0.194295	1.26776
CR_09760W_A	15.6551	-1.57426	0.670072	-2.34939	0.018804	0.829553	0.0419669
C4_04020C_A	0.0838831	-1.57379	4.06301	-0.387346	0.6985	1	0.0419669
C3_07720C_A	0.0838831	-1.57379	4.06301	-0.387346	0.6985	1	0.0469057
C1_03580W_A	0.0838831	-1.57379	4.06301	-0.387346	0.6985	1	0.0455872
C5_03340W_A	0.0838831	-1.57379	4.06301	-0.387346	0.6985	1	0.563951
C1_03890W_A	0.0838831	-1.57379	4.06301	-0.387346	0.6985	1	0.563951
C1_13460W_A	0.0838831	-1.57379	4.06301	-0.387346	0.6985	1	0.563951
C1_06950C_A	0.0838831	-1.57379	4.06301	-0.387346	0.6985	1	0.0455872
C4_06920C_A	0.0838831	-1.57379	4.06301	-0.387346	0.6985	1	0.267755
C2_08880W_A	0.0838831	-1.57379	4.06301	-0.387346	0.6985	1	0.0455872
C1_10980W_A	0.0838831	-1.57379	4.06301	-0.387346	0.6985	1	0.0469057
CR_07610C_A	0.0838831	-1.57379	4.06301	-0.387346	0.6985	1	0.0455872
C1_12330W_A	0.0838831	-1.57379	4.06301	-0.387346	0.6985	1	0.0469057
C2_03940C_A	39.7715	-1.57306	0.453934	-3.4654	0.000529445	0.0602007	1.20398
CR_01360W_A	19.4784	-1.56574	0.728975	-2.14787	0.0317243	0.487575	0.267755
C5_02740W_A	17.6467	-1.56339	0.948134	-1.64891	0.0991657	0.761927	0.267755
CR_04820W_A	19.9335	-1.5589	0.652962	-2.38743	0.0169667	0.75807	0.0469057
C7_01440W_A	14.7127	-1.55495	0.756341	-2.05588	0.0397939	1	0.0455872
C1_02380C_A	13.9457	-1.54911	0.816038	-1.89833	0.0576523	1	0.0455872
C1_08750W_A	23.6461	-1.54795	0.600661	-2.57709	0.00996374	0.186258	1.26776
C2_09550C_A	1.71734	-1.53572	2.08616	-0.736145	0.461643	1	0.563951
CR_03300C_A	0.0936092	-1.53377	4.06225	-0.377565	0.705753	1	0.0455872
C3_06130W_A	0.0936092	-1.53377	4.06225	-0.377565	0.705753	1	0.0419669
C4_03930C_A	28.4634	-1.53143	0.494718	-3.09557	0.00196438	0.0999146	0.992938
C4_06520W_A	0.0901609	-1.52635	4.06212	-0.375751	0.707102	1	0.0419669
C4_00640W_A	0.0901609	-1.52635	4.06212	-0.375751	0.707102	1	0.563951
C2_05310C_A	0.0901609	-1.52635	4.06212	-0.375751	0.707102	1	0.563951
CR_00140W_A	24.093	-1.52336	0.550599	-2.76674	0.00566204	0.164883	0.992938
C4_03950C_A	0.22709	-1.52295	4.06205	-0.374921	0.707719	1	0.0469057
C3_03610W_A	8.5712	-1.52051	1.0492	-1.44921	0.14728	1	0.0455872
C7_03460W_A	7.20021	-1.51668	0.89283	-1.69874	0.0893686	1	0.0469057
C1_12480W_A	14.9371	-1.5142	0.572034	-2.64704	0.00811998	0.573765	0.0455872
C3_03640W_A	45.7702	-1.5118	0.523915	-2.88559	0.00390679	0.121875	1.26776
C4_00210W_A	16.634	-1.50843	0.622418	-2.4235	0.0153717	0.734172	0.0455872
CR_03440W_A	8.03887	-1.5076	0.887208	-1.69927	0.0892686	1	0.0469057
C2_06440C_A	7.75791	-1.50066	0.922682	-1.62641	0.103863	0.777072	0.267755
C2_01960C_A	2.63715	-1.49504	1.61401	-0.926291	0.354295	1	0.267755
CR_02490W_A	5.25622	-1.49134	1.11741	-1.33464	0.181995	0.989928	0.267755
C1_06920C_A	42.9421	-1.48862	0.44492	-3.34582	0.00082039	0.0722139	0.976496
C4_03460C_A	2.20977	-1.48772	1.68533	-0.882748	0.377372	0.98203	0.563951
C4_05980C_A	18.4615	-1.48571	0.7469	-1.98917	0.0466823	1	0.0419669
C1_07800W_A	8.9878	-1.48441	1.15963	-1.28007	0.20052	1	0.0455872
C1_00240C_A	0.0964388	-1.48072	4.06128	-0.364594	0.715415	1	0.0455872
C7_03900W_A	0.0964388	-1.48072	4.06128	-0.364594	0.715415	1	0.0455872
C2_02640C_A	38.3355	-1.47768	0.989709	-1.49305	0.135425	0.513631	0.992938
C2_02940W_A	35.2451	-1.47718	0.590491	-2.50161	0.0123631	0.223997	0.921892
C1_09770W_A	16.5555	-1.47704	0.879446	-1.67951	0.0930531	0.55728	0.563951
C1_11620W_A	12.5819	-1.46886	1.05166	-1.3967	0.162503	0.93806	0.267755
C4_06200W_A	11.5694	-1.46051	0.662959	-2.20302	0.0275935	0.927742	0.0469057
C6_02420W_A	35.7493	-1.46001	0.572214	-2.55151	0.0107257	0.192376	1.20398
C6_01450C_A	15.9589	-1.45314	0.835238	-1.73979	0.0818961	1	0.0469057
C4_02210W_A	2.89765	-1.45237	1.60924	-0.902518	0.366782	1	0.0469057
C2_08050C_A	78.7609	-1.45151	0.414378	-3.50287	0.000460281	0.0614165	0.971458
C3_04210W_A	4.02502	-1.45141	1.11203	-1.30519	0.191828	1	0.0469057
C3_03270W_A	26.9734	-1.44753	0.652528	-2.21834	0.0265315	0.279485	0.976496
C5_01840C_A	46.1964	-1.43757	0.495452	-2.90153	0.0037135	0.119829	1.26776
CR_06980W_A	9.5716	-1.43696	0.867352	-1.65672	0.0975769	0.566904	0.563951
C4_01350W_A	0.102717	-1.43678	4.06051	-0.353844	0.723456	1	0.267755
C2_06400C_A	0.102717	-1.43678	4.06051	-0.353844	0.723456	1	0.0455872
CR_06580W_A	0.102717	-1.43678	4.06051	-0.353844	0.723456	1	0.0469057
C3_06660C_A	0.102717	-1.43678	4.06051	-0.353844	0.723456	1	0.267755
C5_01120W_A	0.102717	-1.43678	4.06051	-0.353844	0.723456	1	0.0419669
C7_04220W_A	0.102717	-1.43678	4.06051	-0.353844	0.723456	1	0.0469057
C3_06630W_A	14.224	-1.43365	1.45634	-0.984416	0.324911	1	0.0419669
CR_06240C_A	3.68688	-1.42956	1.33901	-1.06762	0.285691	1	0.0419669
C1_07080W_A	27.6767	-1.42934	0.517735	-2.76075	0.00576683	0.142997	1.26776
C5_04080C_A	47.6388	-1.42896	0.364247	-3.92304	8.74403e-05	0.0282942	0.921892
C7_01570C_A	12.7195	-1.42861	0.643234	-2.22098	0.0263526	0.907978	0.0469057
C2_05570C_A	17.6529	-1.42609	0.535052	-2.66533	0.00769137	0.555342	0.0469057
C4_02990C_A	70.593	-1.41499	0.402686	-3.51388	0.000441613	0.0547523	1.26776
C1_10250C_A	3.66805	-1.4101	1.60219	-0.880108	0.378801	1	0.267755
C4_00230W_A	41.859	-1.40375	2.16785	-0.647533	0.517287	0.907978	0.921892
C2_00440W_A	30.3657	-1.40159	0.529776	-2.64562	0.00815411	0.177411	1.20398
C3_07450C_A	26.375	-1.39703	0.62207	-2.24578	0.0247183	0.270521	0.992938
C1_05880W_A	60.4675	-1.39622	0.588575	-2.3722	0.0176824	0.246376	0.956414
C6_02100W_A	503.939	-1.39525	0.612368	-2.27845	0.0226998	0.231893	1.57692
C2_00290W_A	24.9118	-1.37949	0.487552	-2.82941	0.00466332	0.154269	0.921892
C1_03200C_A	62.3087	-1.37511	0.433984	-3.16857	0.00153189	0.0920897	0.971458
C3_02030W_A	58.2583	-1.36867	0.360282	-3.79887	0.000145356	0.0294611	1.26776
CR_01200W_A	12.5567	-1.36661	0.711845	-1.91982	0.054881	0.607861	0.267755
C3_01420C_A	70.3225	-1.3662	0.473241	-2.8869	0.00389056	0.138895	0.959252
C1_05080W_A	0.111844	-1.35788	4.05916	-0.334522	0.737986	1	0.0455872
CR_08750C_A	0.111844	-1.35788	4.05916	-0.334522	0.737986	1	0.0469057
C1_06000W_A	0.111844	-1.35788	4.05916	-0.334522	0.737986	1	0.0419669
C2_07870C_A	0.111844	-1.35788	4.05916	-0.334522	0.737986	1	0.563951
C7_02250W_A	0.111844	-1.35788	4.05916	-0.334522	0.737986	1	0.563951
C4_02910W_A	0.111844	-1.35788	4.05916	-0.334522	0.737986	1	0.0469057
C3_03580C_A	0.111844	-1.35788	4.05916	-0.334522	0.737986	1	0.0469057
C4_01030W_A	0.111844	-1.35788	4.05916	-0.334522	0.737986	1	0.563951
C7_02130W_A	0.111844	-1.35788	4.05916	-0.334522	0.737986	1	0.0419669
C6_03600C_A	0.111844	-1.35788	4.05916	-0.334522	0.737986	1	0.267755
C2_06450C_A	0.111844	-1.35788	4.05916	-0.334522	0.737986	1	0.0419669
C2_00980W_A	0.111844	-1.35788	4.05916	-0.334522	0.737986	1	0.0455872
C4_05580C_A	0.111844	-1.35788	4.05916	-0.334522	0.737986	1	0.563951
C5_01990W_A	0.111844	-1.35788	4.05916	-0.334522	0.737986	1	0.267755
C3_03700C_A	0.111844	-1.35788	4.05916	-0.334522	0.737986	1	0.267755
CR_04620C_A	0.111844	-1.35788	4.05916	-0.334522	0.737986	1	0.0469057
C2_08890W_A	0.111844	-1.35788	4.05916	-0.334522	0.737986	1	0.267755
C5_02090W_A	0.111844	-1.35788	4.05916	-0.334522	0.737986	1	0.0469057
C2_06980W_A	0.111844	-1.35788	4.05916	-0.334522	0.737986	1	0.563951
C3_06510C_A	0.115282	-1.35734	4.05915	-0.334389	0.738086	1	0.0455872
C3_07870W_A	0.115282	-1.35734	4.05915	-0.334389	0.738086	1	0.0455872
C1_01980W_A	122.666	-1.35672	0.402928	-3.36714	0.000759519	0.0705502	0.956414
C1_11570W_A	3.3693	-1.35029	1.87168	-0.721429	0.470646	1	0.0469057
C1_07010W_A	13.7662	-1.34502	0.695891	-1.9328	0.0532607	1	0.0469057
C6_00520W_A	10.9402	-1.345	0.860009	-1.56394	0.117833	1	0.0469057
C3_06980W_A	11.3745	-1.34313	0.703717	-1.90862	0.0563108	1	0.0419669
CR_03080C_A	15.0445	-1.3404	0.79371	-1.68877	0.0912627	1	0.0455872
C4_06390W_A	1175.97	-1.33974	0.381626	-3.51061	0.000447074	0.0538593	1.49658
C3_07100C_A	46.5015	-1.33943	0.565907	-2.36688	0.0179389	0.232962	1.20398
C4_03000C_A	71.4307	-1.3308	0.380126	-3.50094	0.000463627	0.0614165	0.959252
C4_05250W_A	40.5772	-1.32471	0.547667	-2.41883	0.0155705	0.234637	0.976496
C1_00850W_A	20.7707	-1.32132	0.641477	-2.05981	0.0394164	0.303827	1.20398
C3_05920W_A	48.0358	-1.32012	0.414976	-3.1812	0.00146666	0.0824626	1.26776
C1_06310W_A	0.118122	-1.3187	4.05851	-0.324922	0.74524	1	0.0419669
CR_04370W_A	19.5027	-1.31868	0.604099	-2.18289	0.0290442	0.958975	0.0455872
C4_06380W_A	10.1585	-1.31652	0.802501	-1.64052	0.100897	1	0.0455872
CR_03320C_A	15.3625	-1.31425	0.857063	-1.53343	0.12517	0.627757	0.563951
C2_04180C_A	20.714	-1.31348	0.538031	-2.44127	0.0146357	0.234634	0.921892
C4_03710C_A	17.7048	-1.31244	0.864987	-1.51729	0.129193	0.635185	0.563951
C4_04930C_A	19.9976	-1.30917	0.792523	-1.6519	0.0985542	1	0.0469057
C2_04520C_A	7.81914	-1.30508	0.835196	-1.5626	0.118147	1	0.0419669
C3_03470W_A	8.6851	-1.30395	0.90963	-1.4335	0.151715	1	0.0455872
C1_10750C_A	26.1793	-1.30212	0.54672	-2.38169	0.0172335	0.231893	1.20398
C7_01670W_A	24.5509	-1.29962	0.656445	-1.97979	0.0477274	0.320762	1.26776
C4_02660W_A	3.92438	-1.29887	1.73419	-0.748977	0.453871	1	0.0419669
C2_07180W_A	3.46501	-1.29136	1.52478	-0.846917	0.397041	1	0.0419669
CR_04790W_A	30.8498	-1.29082	0.448187	-2.88009	0.00397567	0.139591	0.921892
CR_00870C_A	16.3788	-1.29009	0.659398	-1.95647	0.0504102	1	0.0419669
C5_00890C_A	35.9973	-1.28276	0.577412	-2.22157	0.0263124	0.256158	1.26776
C5_00620W_A	9.11696	-1.2815	0.826855	-1.54985	0.121177	1	0.0455872
C4_01930C_A	13.8146	-1.27569	0.641677	-1.98806	0.0468054	0.423657	0.563951
C2_10330C_A	6.71985	-1.27289	0.843433	-1.50918	0.131252	1	0.0469057
C1_07930C_A	30.9242	-1.27093	0.538171	-2.36157	0.0181978	0.231893	1.26776
C5_04970C_A	8.63553	-1.26918	0.781119	-1.62482	0.1042	1	0.0455872
CR_09150W_A	27.5827	-1.26916	0.499704	-2.53983	0.0110907	0.194295	1.20398
C1_01570C_A	39.0341	-1.26701	0.431929	-2.93337	0.00335308	0.114987	1.26776
CR_06480C_A	17.812	-1.26108	0.734476	-1.71698	0.0859822	0.536821	0.563951
C1_13500C_A	3.72864	-1.25707	1.27334	-0.987219	0.323535	1	0.0469057
CR_08330W_A	34.4932	-1.25534	0.582168	-2.15632	0.0310588	0.298667	0.992938
C5_05010W_A	3.87078	-1.25045	1.38773	-0.90108	0.367546	1	0.0469057
C2_08330W_A	28.3494	-1.24912	0.60035	-2.08065	0.0374658	0.320803	0.992938
C4_05120C_A	0.130688	-1.2472	4.05738	-0.307391	0.758546	1	0.267755
CR_02270C_A	37.4582	-1.24232	0.5924	-2.0971	0.035985	0.316914	0.992938
C2_09700W_A	12.8863	-1.24102	0.805732	-1.54024	0.123502	1	0.0455872
C7_01290W_A	32.7757	-1.23348	0.436878	-2.8234	0.00475166	0.151194	0.976496
CR_07700W_A	16.8624	-1.22808	0.58902	-2.08495	0.037074	0.392217	0.563951
C1_10740C_A	1612.57	-1.22393	0.505154	-2.42289	0.0153976	0.198375	1.57692
C1_13770C_A	35.2857	-1.22331	0.477237	-2.56332	0.0103677	0.200258	0.976496
C2_09240C_A	25.2197	-1.22201	0.500382	-2.44215	0.0146001	0.234634	0.921892
CR_10390W_A	28.1092	-1.22142	0.597202	-2.04524	0.0408316	0.331995	0.992938
C1_06360W_A	40.2138	-1.21665	0.395016	-3.08	0.00206997	0.103392	0.976496
C6_02750C_A	25.7295	-1.21332	0.624896	-1.94163	0.0521818	0.331995	1.26776
C7_04070C_A	0.140414	-1.21218	4.05684	-0.2988	0.765093	1	0.267755
C3_06840C_A	0.140414	-1.21218	4.05684	-0.2988	0.765093	1	0.0419669
C3_06790W_A	0.140414	-1.21218	4.05684	-0.2988	0.765093	1	0.0469057
CR_05410C_A	0.140414	-1.21218	4.05684	-0.2988	0.765093	1	0.267755
CR_01460C_A	0.140414	-1.21218	4.05684	-0.2988	0.765093	1	0.563951
C3_02740C_A	0.136966	-1.2114	4.05683	-0.298609	0.765239	1	0.0469057
C4_06280C_A	16.1867	-1.2102	0.694905	-1.74153	0.0815899	1	0.0455872
C2_05070W_A	5.99628	-1.2095	1.10385	-1.09571	0.273208	0.850755	0.563951
C2_02820C_A	26.1559	-1.20863	0.558728	-2.16319	0.0305267	0.297825	0.992938
C1_06290C_A	0.136956	-1.20839	4.05678	-0.297869	0.765803	1	0.0469057
C1_00720W_A	0.136956	-1.20839	4.05678	-0.297869	0.765803	1	0.0469057
C5_05180W_A	0.136956	-1.20839	4.05678	-0.297869	0.765803	1	0.0455872
C1_06430C_A	0.136956	-1.20839	4.05678	-0.297869	0.765803	1	0.0469057
C5_04400W_A	0.136956	-1.20839	4.05678	-0.297869	0.765803	1	0.563951
C1_14020W_A	0.136956	-1.20839	4.05678	-0.297869	0.765803	1	0.0455872
C6_01660C_A	0.136956	-1.20839	4.05678	-0.297869	0.765803	1	0.267755
C2_10000C_A	0.136956	-1.20839	4.05678	-0.297869	0.765803	1	0.0455872
C2_02130C_A	0.136956	-1.20839	4.05678	-0.297869	0.765803	1	0.0455872
C4_02240C_A	0.136956	-1.20839	4.05678	-0.297869	0.765803	1	0.267755
C1_01310W_A	0.136956	-1.20839	4.05678	-0.297869	0.765803	1	0.0419669
C4_05200C_A	0.136956	-1.20839	4.05678	-0.297869	0.765803	1	0.267755
C3_06960C_A	0.136956	-1.20839	4.05678	-0.297869	0.765803	1	0.0469057
C1_11390W_A	0.136956	-1.20839	4.05678	-0.297869	0.765803	1	0.0419669
C1_13440C_A	0.136956	-1.20839	4.05678	-0.297869	0.765803	1	0.563951
CR_06870C_A	0.136956	-1.20839	4.05678	-0.297869	0.765803	1	0.563951
C2_08150W_A	0.136956	-1.20839	4.05678	-0.297869	0.765803	1	0.0469057
C2_10150W_A	0.136956	-1.20839	4.05678	-0.297869	0.765803	1	0.0469057
CR_09390C_A	0.136956	-1.20839	4.05678	-0.297869	0.765803	1	0.0455872
C4_01310W_A	16.1912	-1.20745	0.89414	-1.3504	0.176886	1	0.0419669
C1_00670C_A	34.022	-1.20623	0.524324	-2.30055	0.0214174	0.268846	0.921892
C2_08580W_A	3.77059	-1.20492	1.69976	-0.708877	0.478401	1	0.267755
C3_02560W_A	13.1536	-1.20353	0.666861	-1.80476	0.071112	0.496818	0.563951
CR_09180W_A	50.971	-1.20025	0.544882	-2.20278	0.0276106	0.26093	1.26776
C4_01640C_A	6.1499	-1.20024	1.01193	-1.18608	0.23559	1	0.0419669
C4_01330W_A	3.03039	-1.19916	1.58981	-0.754281	0.45068	1	0.267755
C6_04310W_A	62.0831	-1.18681	0.520742	-2.27907	0.0226628	0.268846	0.956414
C2_05130W_A	23.9621	-1.18499	0.859422	-1.37882	0.167951	0.566904	0.976496
C4_00290C_A	0.139805	-1.17922	4.05634	-0.29071	0.771273	1	0.0469057
CR_08850W_A	0.139805	-1.17922	4.05634	-0.29071	0.771273	1	0.267755
C5_00600C_A	0.139805	-1.17922	4.05634	-0.29071	0.771273	1	0.267755
C2_05900W_A	0.139805	-1.17922	4.05634	-0.29071	0.771273	1	0.563951
C2_02560W_A	0.139805	-1.17922	4.05634	-0.29071	0.771273	1	0.0469057
C2_00130W_A	8.25019	-1.17809	0.993114	-1.18626	0.235521	1	0.267755
C1_04020C_A	430.666	-1.17694	0.828887	-1.41991	0.155635	0.492346	1.26776
C1_02540C_A	0.303268	-1.17081	4.05622	-0.288645	0.772853	1	0.0469057
C3_07520W_A	0.385703	-1.17081	4.05622	-0.288645	0.772853	1	0.563951
C4_04250W_A	39.7034	-1.16842	0.58667	-1.99162	0.0464128	0.322664	1.20398
C2_08420W_A	27.8901	-1.16824	0.454686	-2.56933	0.0101894	0.189785	1.20398
C5_01130W_A	20.1795	-1.16151	0.769971	-1.50851	0.131423	1	0.0419669
C1_08910C_A	21.9946	-1.16123	0.608851	-1.90725	0.0564881	0.375647	0.976496
C7_01360C_A	4.94952	-1.1596	1.42406	-0.814292	0.415478	1	0.563951
C3_02610C_A	706.875	-1.15903	0.373088	-3.1066	0.00189255	0.0764825	2.00674
C5_03710C_A	4.93802	-1.15753	1.49222	-0.775706	0.437923	1	0.267755
C6_03930W_A	113.549	-1.15659	0.265444	-4.35719	1.31742e-05	0.00937966	0.971458
CR_03790C_A	21.6893	-1.15658	0.824653	-1.40251	0.160763	0.497497	1.26776
C2_03310C_A	28.6861	-1.15492	0.460609	-2.50737	0.0121632	0.222115	0.921892
CR_03130W_A	27.9734	-1.15095	0.586895	-1.96108	0.0498697	0.332728	1.20398
C1_04080W_A	14.2055	-1.14998	0.633825	-1.81435	0.0696243	1	0.0455872
C4_03490C_A	0.146083	-1.14577	4.05585	-0.282498	0.777561	1	0.267755
C4_02650C_A	0.149531	-1.14568	4.05585	-0.282476	0.777579	1	0.563951
CR_04290W_A	22.1635	-1.14007	0.625428	-1.82286	0.0683244	0.396808	0.992938
C1_08840W_A	19.7051	-1.13892	0.758164	-1.50221	0.133044	0.640341	0.563951
C1_00910W_A	20.7531	-1.13833	0.958499	-1.18762	0.234982	0.655955	0.921892
C2_01540W_A	28.7641	-1.13768	0.656573	-1.73276	0.0831383	0.438049	0.921892
C4_05400C_A	23.6555	-1.13754	0.553449	-2.05536	0.0398447	0.330393	0.976496
C2_05480C_A	17.863	-1.13503	0.788041	-1.44032	0.149778	0.906668	0.267755
C5_04180W_A	12.2543	-1.13061	0.965347	-1.17119	0.241522	1	0.267755
C1_02980W_A	141.672	-1.12762	0.469555	-2.40146	0.0163299	0.238464	0.959252
C1_11240C_A	119.693	-1.1276	0.234365	-4.81127	1.49973e-06	0.00241723	1.26776
C4_07070W_A	16.6662	-1.12376	0.660033	-1.70258	0.0886468	1	0.0455872
C2_00240C_A	15.1475	-1.12297	0.607866	-1.8474	0.0646887	0.48393	0.563951
C3_04620C_A	20.6707	-1.1199	0.572921	-1.95471	0.0506171	0.356913	0.992938
C1_05840W_A	23.843	-1.11745	0.741655	-1.50669	0.13189	0.509215	0.992938
C2_06300W_A	27.0564	-1.11343	0.463005	-2.40479	0.0161816	0.239106	0.921892
C7_03110W_A	4.24379	-1.11288	1.25543	-0.886448	0.375376	1	0.0455872
CR_05880W_A	24.5783	-1.1103	0.496876	-2.23455	0.0254468	0.274105	0.976496
C2_02880C_A	52.5805	-1.10834	0.401231	-2.76236	0.00573853	0.142997	1.26776
CR_03870W_A	31.4734	-1.1062	0.483588	-2.28749	0.0221671	0.269959	0.921892
C6_02020C_A	148.432	-1.10316	0.424216	-2.60048	0.00930935	0.168154	1.57692
C4_02010C_A	31.7889	-1.10159	0.566163	-1.94571	0.0516891	0.359379	0.992938
C5_03690W_A	16.7454	-1.10125	0.851099	-1.29392	0.195694	0.74343	0.563951
C1_00790W_A	18.4457	-1.10087	0.553681	-1.98827	0.0467818	1	0.0419669
C2_01870C_A	25.2229	-1.0974	0.637885	-1.72037	0.0853655	0.430431	0.976496
CR_03280W_A	530.461	-1.09579	0.418255	-2.6199	0.00879559	0.14067	2.00674
C2_03070C_A	14.5329	-1.09533	1.23018	-0.890381	0.373262	1	0.0455872
C7_01170C_A	5.09645	-1.09431	1.56118	-0.700948	0.483335	1	0.0455872
C1_08900W_A	84.5789	-1.09339	0.47086	-2.3221	0.0202274	0.257492	0.959252
C2_03570C_A	10.9852	-1.09063	0.81518	-1.3379	0.18093	0.987439	0.267755
CR_09190C_A	30.618	-1.09052	0.50291	-2.16843	0.0301262	0.297825	0.976496
C5_04250W_A	8.52216	-1.0876	1.16007	-0.937533	0.348484	1	0.0469057
C1_12700W_A	29.4126	-1.08515	0.488232	-2.22261	0.0262421	0.256158	1.26776
C3_00100W_A	26.8498	-1.08428	0.571859	-1.89606	0.0579526	0.386355	0.921892
C2_00540W_A	75.6376	-1.08396	1.38031	-0.785305	0.432275	0.737279	1.26776
C4_06780C_A	57.4181	-1.08388	0.584079	-1.8557	0.0634962	0.376136	1.08811
C1_08040W_A	36.419	-1.08178	0.48072	-2.25033	0.0244279	0.255912	1.20398
C4_00430W_A	4.22152	-1.08144	1.3993	-0.772846	0.439614	1	0.267755
C1_10400C_A	281.8	-1.08098	0.315122	-3.43034	0.000602815	0.0555632	1.57692
C2_07300C_A	7.90487	-1.08085	0.992818	-1.08867	0.276299	1	0.0469057
C7_02280W_A	175.112	-1.0802	0.508008	-2.12634	0.0334748	0.257625	1.57692
C1_11480W_A	39.0343	-1.0782	0.910491	-1.1842	0.236334	0.641293	0.992938
C5_00870C_A	3.01355	-1.07587	1.88489	-0.570788	0.568143	1	0.267755
C7_03640C_A	41.6371	-1.07358	0.496228	-2.16348	0.0305041	0.298667	0.976496
C3_00380C_A	38.3645	-1.07337	0.490207	-2.18963	0.0285512	0.298434	0.921892
C1_02630C_A	71.7796	-1.07263	0.302862	-3.54163	0.000397656	0.0547523	1.26776
C2_07750W_A	25.014	-1.07187	0.520041	-2.06112	0.0392912	0.327995	0.976496
C4_06840W_A	30.5943	-1.07179	0.803024	-1.33469	0.181979	0.580002	0.992938
C1_12140W_A	19.6709	-1.07031	0.540988	-1.97843	0.0478803	1	0.0455872
C1_02490C_A	48.7817	-1.06518	0.412421	-2.58274	0.00980178	0.199362	0.976496
C2_03120W_A	19.2532	-1.06469	0.677846	-1.5707	0.116252	0.815154	0.267755
C3_05680W_A	53.9224	-1.06411	0.625562	-1.70105	0.0889328	0.407557	1.20398
C7_03350C_A	25.1576	-1.0639	0.564399	-1.88501	0.0594279	0.354605	1.20398
C6_00490W_A	30.2566	-1.06348	0.565368	-1.88104	0.059966	0.354605	1.20398
C6_01290C_A	23.1955	-1.0628	0.533822	-1.99092	0.0464897	0.322664	1.20398
C1_04460C_A	30.2287	-1.06141	0.6331	-1.67653	0.0936342	0.446034	0.992938
C2_09000C_A	8.20999	-1.05965	0.915104	-1.15796	0.246881	1	0.267755
C1_04500W_A	55.8292	-1.05851	0.419659	-2.5223	0.011659	0.194295	1.26776
C2_10650W_A	70.571	-1.05724	0.452401	-2.33694	0.0194421	0.241788	1.08811
C3_00340W_A	13.029	-1.05498	0.661618	-1.59454	0.110814	1	0.0469057
C6_01510W_A	61.0359	-1.05361	0.652719	-1.61419	0.106486	0.479291	0.956414
C4_05640C_A	27.6352	-1.05291	0.577285	-1.82389	0.068168	0.366876	1.26776
C2_09540W_A	0.168375	-1.05202	4.05452	-0.259468	0.795274	1	0.0419669
C4_04650W_A	15.2963	-1.05123	0.832126	-1.26331	0.206477	1	0.267755
C1_04280C_A	29.2659	-1.04968	0.531291	-1.97571	0.0481876	0.354605	0.976496
C3_00730W_A	69.9749	-1.04818	0.43246	-2.42376	0.0153607	0.2348	0.956414
C3_02100W_A	43.244	-1.0447	0.550965	-1.89612	0.0579438	0.352909	1.20398
C1_03000W_A	12.9067	-1.04414	0.87408	-1.19456	0.232261	0.797506	0.563951
C1_03900W_A	12.0789	-1.04398	0.947613	-1.10169	0.270597	0.84898	0.563951
C2_04730W_A	69.9758	-1.04359	0.315368	-3.30912	0.000935912	0.0764825	0.959252
CR_04330W_A	21.8797	-1.04041	1.00611	-1.03409	0.301093	0.641293	1.26776
C1_01420C_A	57.4895	-1.03969	0.446955	-2.32615	0.0200104	0.234634	1.26776
C4_05830W_A	4.24379	-1.03948	1.34377	-0.773559	0.439191	1	0.0455872
C2_07720C_A	32.2564	-1.03917	0.531604	-1.95478	0.0506096	0.335654	1.20398
C4_05800C_A	18.8047	-1.03753	0.550838	-1.88355	0.0596254	1	0.0419669
CR_06550C_A	12.5537	-1.03489	0.724727	-1.42798	0.153299	1	0.0469057
C5_04220W_A	5.41015	-1.03465	1.18223	-0.875166	0.381484	0.98754	0.563951
C2_06050C_A	0.259028	-1.03345	3.75155	-0.275472	0.782954	1	0.0419669
CR_05930C_A	0.241795	-1.0326	3.82107	-0.270238	0.786977	1	0.0469057
C3_06970W_A	65.3454	-1.03234	0.38408	-2.68782	0.00719208	0.183652	0.956414
C3_07470W_A	18.95	-1.03142	0.91349	-1.1291	0.258856	1	0.0469057
C4_07150W_A	5.24965	-1.03044	1.25731	-0.819555	0.41247	1	0.0469057
C5_03770C_A	13.3657	-1.03005	0.894219	-1.1519	0.249362	1	0.0455872
C1_07960W_A	13.1345	-1.02987	0.826352	-1.24629	0.212659	1	0.0419669
C4_01140C_A	25.2597	-1.02977	0.490934	-2.09756	0.0359436	0.317746	0.976496
C1_08770W_A	29.4336	-1.02927	0.433308	-2.37539	0.0175304	0.241864	0.976496
CR_04970C_A	0.245243	-1.02829	4.0542	-0.253635	0.799778	1	0.0455872
C2_00550W_A	0.167766	-1.02659	4.05418	-0.253218	0.8001	1	0.267755
C1_11750W_A	60.614	-1.02368	0.305879	-3.34667	0.000817875	0.0705502	1.08811
C1_11100W_A	19.9873	-1.02356	0.858775	-1.19188	0.233307	1	0.267755
C1_11410C_A	0.171194	-1.02072	4.0541	-0.251775	0.801215	1	0.0455872
C2_01460C_A	0.171194	-1.02072	4.0541	-0.251775	0.801215	1	0.267755
C4_05350W_A	27.9695	-1.01943	0.474633	-2.14783	0.0317276	0.310705	0.921892
C6_00930C_A	73.6681	-1.01866	0.622252	-1.63705	0.10162	0.418801	1.26776
C2_05810W_A	42.0425	-1.01806	0.459146	-2.21729	0.0266032	0.25727	1.26776
C2_08790W_A	58.3957	-1.01804	0.351701	-2.89462	0.00379623	0.128835	1.08811
C2_06770W_A	44.3408	-1.01779	0.397579	-2.55998	0.0104679	0.200736	0.976496
C1_09110W_A	17.6777	-1.01772	0.614304	-1.6567	0.0975799	0.566904	0.563951
C5_03870C_A	63.304	-1.01712	0.349354	-2.91143	0.00359781	0.134068	0.956414
C4_06290W_A	17.4211	-1.01698	0.750754	-1.3546	0.175544	0.97263	0.267755
C7_01620C_A	31.7165	-1.01695	0.653044	-1.55725	0.119411	0.503387	0.921892
CR_03450W_A	158.726	-1.01658	0.229567	-4.42826	9.49975e-06	0.00716917	1.57692
C3_06670C_A	29.7039	-1.01621	0.516262	-1.9684	0.0490218	0.354605	0.976496
CR_02100C_A	43.1879	-1.0131	0.379672	-2.66835	0.00762246	0.168792	1.26776
C2_08680W_A	48.8781	-1.01291	0.351859	-2.87874	0.00399273	0.138895	0.992938
C3_02810C_A	73.5004	-1.01245	0.379334	-2.66901	0.00760745	0.17806	1.08811
C2_08530C_A	5.28788	-1.01142	1.40367	-0.720554	0.471184	1	0.0469057
C3_07640C_A	106.584	-1.00947	0.39419	-2.56087	0.0104409	0.200736	0.959252
C4_03750C_A	21.5853	-1.00921	0.54638	-1.84709	0.0647346	0.40116	0.921892
C7_01430C_A	45.3756	-1.00844	0.521866	-1.93238	0.0533124	0.335654	1.26776
C2_03970W_A	30.1071	-1.00313	0.555975	-1.80426	0.07119	0.377392	1.20398
C7_03380W_A	17.7327	-1.00177	0.553631	-1.80946	0.0703802	0.666034	0.267755
C6_01360W_A	55.0854	-0.999655	0.509989	-1.96015	0.0499782	0.357336	0.976496
C3_03860W_A	22.0276	-0.999366	0.471787	-2.11826	0.0341534	0.286474	1.20398
C5_04160W_A	28.6493	-0.999292	0.549335	-1.81909	0.068897	0.401696	0.976496
C2_09250W_A	19.1186	-0.997401	0.563633	-1.76959	0.0767952	0.686854	0.267755
C3_02870C_A	27.5723	-0.996594	0.649419	-1.53459	0.124884	0.499978	0.976496
C1_06720C_A	37.128	-0.99653	0.461032	-2.16152	0.0306552	0.271442	1.20398
C4_00680W_A	66.5726	-0.996433	0.451132	-2.20874	0.0271928	0.25883	1.26776
C1_09690W_A	231.94	-0.995773	0.476617	-2.08925	0.0366849	0.270443	1.49658
C1_09560C_A	0.177492	-0.99577	4.05376	-0.245641	0.80596	1	0.0455872
C6_02300C_A	12.1471	-0.995527	0.685255	-1.45278	0.146284	1	0.0455872
CR_05800C_A	28.6505	-0.99217	0.558114	-1.77772	0.07545	0.377671	1.26776
C6_02250W_A	24.8832	-0.992106	0.646601	-1.53434	0.124946	0.455276	1.26776
C2_00620C_A	14.4442	-0.991696	0.691804	-1.43349	0.151717	0.67229	0.563951
C1_06040W_A	41.3096	-0.991491	0.369005	-2.68693	0.0072112	0.186258	0.921892
CR_01550C_A	25.7985	-0.991013	0.595073	-1.66537	0.0958399	0.417379	1.20398
C7_03340C_A	17.2162	-0.990925	0.540837	-1.83221	0.0669207	1	0.0419669
C5_00120W_A	19.8811	-0.990627	0.742992	-1.33329	0.182435	1	0.0455872
C3_03130C_A	7.97858	-0.989345	0.816064	-1.21234	0.225383	1	0.0469057
C2_06780C_A	37.414	-0.988828	0.527134	-1.87586	0.060675	0.392217	0.921892
C4_06370C_A	33.473	-0.987209	0.559752	-1.76365	0.0777905	0.417379	0.976496
C2_06650C_A	23.2235	-0.986989	0.584486	-1.68864	0.0912878	0.440907	0.992938
C1_02310C_A	12.5544	-0.986291	0.733156	-1.34527	0.178539	1	0.0469057
C1_04750W_A	47.1341	-0.983798	0.413845	-2.37721	0.017444	0.231893	1.20398
C2_00510W_A	41.3076	-0.983346	0.510543	-1.92608	0.0540945	0.335965	1.26776
C3_00170C_A	82.5148	-0.98019	0.313768	-3.12393	0.00178454	0.0996517	0.971458
C6_02200C_A	30.686	-0.979311	0.612464	-1.59897	0.109828	0.477824	0.992938
C6_02090C_A	24.9485	-0.9759	0.658488	-1.48203	0.138332	0.484327	1.20398
C1_04850C_A	8.54024	-0.975472	0.894558	-1.09045	0.275514	1	0.0469057
C2_08460C_A	7.70692	-0.974813	1.20365	-0.809878	0.41801	1	0.267755
C1_00410C_A	50.0411	-0.973435	0.359081	-2.71091	0.00670989	0.177411	0.992938
C6_02110W_A	25.9911	-0.971295	0.803908	-1.20822	0.226964	0.635185	0.992938
C7_04330C_A	36.5388	-0.970444	0.440804	-2.20153	0.0276984	0.268846	1.20398
CR_01350C_A	149.811	-0.969642	0.220044	-4.40658	1.05017e-05	0.00716917	1.49658
C3_06190C_A	50.4622	-0.969078	0.381544	-2.53988	0.011089	0.21067	0.921892
C5_04230W_A	0.180322	-0.968838	4.05341	-0.239018	0.811092	1	0.563951
C4_02730C_A	0.180322	-0.968838	4.05341	-0.239018	0.811092	1	0.563951
C6_04490W_A	0.180322	-0.968838	4.05341	-0.239018	0.811092	1	0.563951
C1_03320C_A	41.5715	-0.968392	0.515442	-1.87876	0.0602772	0.354605	1.20398
C6_00360C_A	55.981	-0.965947	0.58393	-1.65422	0.0980834	0.463266	0.956414
C5_04950C_A	96.8702	-0.965827	0.283437	-3.40755	0.000655485	0.0688727	0.956414
C7_02480W_A	40.6978	-0.965744	0.42078	-2.29513	0.0217258	0.263859	0.976496
C3_01290W_A	0.187218	-0.965168	4.05336	-0.238115	0.811792	1	0.0455872
C6_00730W_A	0.187218	-0.965168	4.05336	-0.238115	0.811792	1	0.0469057
C4_06900W_A	0.187218	-0.965168	4.05336	-0.238115	0.811792	1	0.0469057
C2_00920W_A	0.187218	-0.965168	4.05336	-0.238115	0.811792	1	0.563951
C1_07430W_A	0.187218	-0.965168	4.05336	-0.238115	0.811792	1	0.563951
C2_07840W_A	0.187218	-0.965168	4.05336	-0.238115	0.811792	1	0.563951
C7_01060W_A	0.187218	-0.965168	4.05336	-0.238115	0.811792	1	0.267755
C7_00500W_A	0.187218	-0.965168	4.05336	-0.238115	0.811792	1	0.0469057
C3_04570C_A	0.187218	-0.965168	4.05336	-0.238115	0.811792	1	0.0455872
CR_03670W_A	0.187218	-0.965168	4.05336	-0.238115	0.811792	1	0.267755
C1_14570C_A	0.187218	-0.965168	4.05336	-0.238115	0.811792	1	0.267755
C2_10490C_A	0.187218	-0.965168	4.05336	-0.238115	0.811792	1	0.0455872
C3_04870W_A	0.187218	-0.965168	4.05336	-0.238115	0.811792	1	0.0455872
C3_00150W_A	0.187218	-0.965168	4.05336	-0.238115	0.811792	1	0.0469057
C1_12000C_A	0.18376	-0.964937	4.05336	-0.238059	0.811836	1	0.0419669
CR_00720W_A	0.18376	-0.964937	4.05336	-0.238059	0.811836	1	0.267755
C6_03700W_A	92.4347	-0.964321	0.525081	-1.83652	0.0662811	0.380081	1.08811
C4_00740W_A	12.3357	-0.963515	0.810891	-1.18822	0.234748	0.801263	0.563951
C2_02360C_A	19.9739	-0.963175	0.49696	-1.93813	0.0526071	0.443927	0.563951
C1_11530C_A	7.63781	-0.961453	1.51217	-0.635812	0.524899	1	0.563951
C1_07550W_A	56.4791	-0.960651	0.388793	-2.47085	0.0134791	0.213906	1.08811
C1_05820C_A	22.0236	-0.960293	0.520758	-1.84403	0.0651787	0.392217	0.976496
C2_03640W_A	27.629	-0.957566	0.978387	-0.978719	0.327719	0.675804	1.20398
CR_06500C_A	34.0643	-0.957369	0.577055	-1.65906	0.0971035	0.453741	0.992938
C1_01920W_A	163.034	-0.955758	0.303138	-3.15288	0.00161669	0.0705502	2.00674
C6_02160W_A	35.0594	-0.955037	0.59852	-1.59566	0.110564	0.440821	1.20398
C1_06490C_A	0.271584	-0.952842	4.0532	-0.235084	0.814144	1	0.0419669
C4_04100C_A	27.1934	-0.951114	0.739851	-1.28555	0.198601	0.599551	0.992938
CR_00380W_A	7.23118	-0.948276	1.02319	-0.926781	0.35404	1	0.0455872
C3_03080W_A	37.3642	-0.947771	0.525111	-1.8049	0.0710907	0.377392	1.20398
C2_02290C_A	8.81763	-0.945021	1.14512	-0.825262	0.409223	1	0.563951
C3_01440C_A	5.50021	-0.942141	1.20334	-0.78294	0.433662	1	0.0469057
CR_06680C_A	57.2527	-0.941281	0.462971	-2.03313	0.0420395	0.322664	1.08811
C2_10120W_A	28.2353	-0.94091	0.557115	-1.6889	0.0912389	0.4564	0.921892
C2_08640C_A	72.4783	-0.938949	0.701989	-1.33756	0.181041	0.586974	0.959252
CR_10020C_A	35.3289	-0.938792	0.465975	-2.01468	0.0439379	0.311108	1.26776
C2_05400W_A	11.3399	-0.938033	0.717972	-1.3065	0.191381	0.735653	0.563951
C2_01880C_A	23.4557	-0.937477	0.624622	-1.50087	0.133389	0.478006	1.20398
C1_04090C_A	19.6974	-0.937168	0.845962	-1.10781	0.267942	1	0.0419669
C1_07170C_A	19.4039	-0.936596	0.789556	-1.18623	0.235531	1	0.267755
C1_06870C_A	23.4711	-0.934993	0.767132	-1.21882	0.222914	0.635185	0.976496
CR_00410W_A	42.5533	-0.932319	0.424658	-2.19546	0.0281306	0.297825	0.921892
C4_06050W_A	22.8853	-0.932204	0.771083	-1.20895	0.22668	0.64902	0.921892
C2_08540C_A	15.7569	-0.931911	0.798152	-1.16759	0.242974	1	0.0455872
C5_02360C_A	4.55948	-0.931875	1.18333	-0.787505	0.430986	1	0.0455872
C5_03750W_A	48.6926	-0.93173	0.444939	-2.09406	0.0362546	0.287104	1.26776
C5_01290C_A	117.012	-0.928582	0.350097	-2.65236	0.00799317	0.180846	1.08811
C4_04380C_A	5.42999	-0.92751	1.20905	-0.767141	0.442998	1	0.0469057
C3_07080W_A	39.1032	-0.927456	0.437382	-2.12047	0.0339665	0.311108	0.976496
C3_04320W_A	31.8524	-0.926253	0.583875	-1.58639	0.112651	0.443927	1.20398
C5_04470C_A	352.436	-0.925147	0.510213	-1.81326	0.0697919	0.311108	2.00674
C3_00740W_A	2.44998	-0.924804	1.47563	-0.626719	0.530843	1	0.0419669
C1_06670W_A	176.869	-0.92355	0.309032	-2.98853	0.00280323	0.0999146	1.49658
C6_03550C_A	40.7371	-0.923547	0.427424	-2.16073	0.0307166	0.3053	0.921892
C2_07630C_A	1773.81	-0.923395	0.384828	-2.3995	0.0164176	0.200736	1.49658
C2_02610C_A	30.8665	-0.923143	0.709165	-1.30173	0.193008	0.611875	0.921892
C2_04960C_A	31.027	-0.922395	0.494031	-1.86708	0.0618907	0.353048	1.26776
C5_02260C_A	54.8873	-0.920562	0.506057	-1.81909	0.0688982	0.366965	1.26776
CR_10480W_A	53.133	-0.919668	0.41372	-2.22292	0.0262209	0.256158	1.26776
C1_02300W_A	15.8896	-0.918912	0.57003	-1.61204	0.106953	0.587286	0.563951
C1_13470W_A	15.799	-0.918201	1.20589	-0.761431	0.4464	1	0.0419669
C4_03940C_A	359.062	-0.917833	0.237082	-3.87138	0.000108221	0.0260749	1.49658
C1_03150C_A	192.918	-0.917435	0.336219	-2.72869	0.00635874	0.122149	2.04559
C5_02330W_A	34.511	-0.917414	0.461009	-1.99001	0.0465894	0.35237	0.976496
CR_05250C_A	31.0262	-0.916822	0.530198	-1.72921	0.083772	0.392217	1.26776
C3_06170C_A	26.9639	-0.916072	0.700842	-1.3071	0.191178	0.534524	1.26776
C2_07170C_A	61.1107	-0.914122	0.476845	-1.91702	0.0552352	0.372466	0.971458
C4_01570C_A	0.196336	-0.913494	4.0527	-0.225404	0.821665	1	0.0419669
C5_02810W_A	16.6796	-0.913247	1.1233	-0.813	0.416218	1	0.267755
C2_03420C_A	50.3034	-0.913215	0.402408	-2.26938	0.0232455	0.268846	0.992938
C4_00760W_A	42.1747	-0.911809	0.410442	-2.22153	0.0263152	0.279045	0.976496
C7_02360W_A	0.196326	-0.911572	4.05268	-0.224931	0.822033	1	0.0469057
C1_03760C_A	285.223	-0.909778	0.228832	-3.97575	7.01566e-05	0.0234157	1.26776
C1_00800C_A	47.9717	-0.909657	0.420147	-2.16509	0.0303808	0.297825	0.992938
C2_01060C_A	4.61466	-0.909536	1.64689	-0.552275	0.58076	1	0.563951
C5_01590W_A	42.3634	-0.909085	0.495973	-1.83293	0.0668123	0.396051	0.976496
CR_08880C_A	4.68932	-0.908227	1.43541	-0.63273	0.52691	1	0.0469057
C1_11560C_A	31.7478	-0.906934	0.498724	-1.81851	0.0689863	0.366965	1.26776
C4_01180W_A	0.348462	-0.906822	3.64294	-0.248926	0.803418	1	0.0455872
C1_05090W_A	54.6343	-0.906759	0.544367	-1.66571	0.0957708	0.453741	0.976496
C4_03370C_A	37.9134	-0.906054	0.465831	-1.94503	0.0517718	0.336906	1.20398
C2_02190C_A	11.3435	-0.905451	0.842356	-1.0749	0.282418	1	0.0455872
C4_01260W_A	38.1918	-0.905418	0.639353	-1.41615	0.156733	0.493715	1.26776
C2_06480W_A	38.5139	-0.900221	0.476311	-1.88999	0.0587599	0.353048	1.20398
C6_03880W_A	55.9031	-0.89922	0.330489	-2.72088	0.00651087	0.177411	0.959252
C1_09140C_A	17.8051	-0.898771	0.626599	-1.43436	0.151468	1	0.0419669
C6_01710C_A	140.031	-0.898389	0.37707	-2.38255	0.017193	0.225294	1.26776
C6_00500C_A	39.0847	-0.896637	0.708429	-1.26567	0.205631	0.613818	0.976496
C6_01060C_A	217.159	-0.896115	0.217269	-4.12445	3.71619e-05	0.0111363	2.04559
C7_00910C_A	56.9382	-0.895888	0.408875	-2.1911	0.0284443	0.293574	0.956414
C1_12440W_A	4.51942	-0.895761	1.28184	-0.698809	0.484672	1	0.563951
C1_06120C_A	7.7474	-0.894372	0.902144	-0.991385	0.321498	0.915555	0.563951
CR_06690C_A	80.1267	-0.893762	0.360843	-2.47687	0.013254	0.226039	0.971458
C6_01810W_A	0.195727	-0.893212	4.05245	-0.220413	0.82555	1	0.563951
C1_13290W_A	0.195727	-0.893212	4.05245	-0.220413	0.82555	1	0.267755
C1_10260C_A	50.6746	-0.892701	0.64958	-1.37427	0.169357	0.580473	0.921892
C5_02640W_A	22.669	-0.892454	0.569672	-1.56661	0.117206	0.498212	0.921892
C2_00150W_A	33.146	-0.890141	0.576499	-1.54405	0.122577	0.49644	0.976496
CR_04910W_A	6.69147	-0.889202	1.22297	-0.727087	0.467173	1	0.0469057
C3_01620W_A	25.5181	-0.889017	0.547543	-1.62365	0.104451	0.46795	0.992938
C1_02600W_A	78.4964	-0.888924	0.366312	-2.42669	0.0152374	0.234634	0.959252
C2_04160W_A	24.7448	-0.887916	0.581625	-1.52661	0.126857	0.503594	0.976496
C2_04750W_A	33.6458	-0.887766	0.44215	-2.00784	0.0446603	0.34236	0.992938
C1_01890C_A	201.572	-0.88702	0.239528	-3.7032	0.000212897	0.0294611	2.00674
C2_09220W_A	470.708	-0.886042	0.403692	-2.19485	0.0281744	0.249113	1.49658
C1_04740W_A	128.871	-0.886028	0.504739	-1.75542	0.0791876	0.422934	0.959252
CR_06440C_A	111.074	-0.884792	0.366978	-2.41102	0.0159079	0.237517	0.959252
C1_00560W_A	29.9864	-0.881603	0.573481	-1.53728	0.124224	0.512414	0.921892
C3_06770W_A	18.9145	-0.879609	0.611386	-1.43871	0.150232	0.907978	0.267755
C2_00420W_A	101.813	-0.879419	0.325761	-2.69958	0.00694268	0.180204	0.959252
C3_03160C_A	21.2466	-0.879117	0.875839	-1.00374	0.315503	0.723383	0.976496
CR_08840C_A	58.86	-0.878673	0.406367	-2.16226	0.0305978	0.301332	0.959252
CR_02660C_A	4.93913	-0.878591	1.08833	-0.807282	0.419504	1	0.563951
C2_10720C_A	89.1694	-0.878354	0.296774	-2.95968	0.00307963	0.124141	0.956414
C2_00660C_A	6.85253	-0.876547	0.929765	-0.942762	0.345802	0.942287	0.563951
C1_05740C_A	7.9441	-0.875487	0.975329	-0.897632	0.369382	0.972252	0.563951
C2_01950C_A	31.5797	-0.874946	0.497536	-1.75856	0.0786529	0.417158	0.992938
C7_01960W_A	60.0075	-0.873076	0.361705	-2.41378	0.0157881	0.234964	0.971458
C2_06740W_A	91.5886	-0.871411	0.296281	-2.94116	0.00326983	0.12779	0.956414
C2_07070W_A	111.51	-0.870585	0.41592	-2.09315	0.0363354	0.320386	0.971458
C4_02760C_A	72.9679	-0.87034	0.361875	-2.40509	0.0161687	0.237822	0.971458
C1_06010W_A	72.1964	-0.868868	0.400939	-2.16709	0.0302283	0.298554	0.971458
C4_03870C_A	10.486	-0.868269	1.21318	-0.715697	0.474179	1	0.0455872
C7_02260W_A	267.502	-0.867498	0.503531	-1.72283	0.0849192	0.372409	1.49658
C5_04010C_A	0.202005	-0.867229	4.05213	-0.214018	0.830533	1	0.267755
C2_08280W_A	39.4657	-0.866661	0.39615	-2.18771	0.0286908	0.298554	0.921892
C4_04880W_A	5.66724	-0.866199	1.24982	-0.693057	0.488274	1	0.563951
C4_04560C_A	106.854	-0.866118	0.377316	-2.29547	0.021706	0.238464	1.26776
C6_04210C_A	82.5816	-0.865713	0.439519	-1.96968	0.0488749	0.354897	0.971458
C3_05170W_A	21.9533	-0.864997	0.483167	-1.79026	0.0734115	0.407566	0.992938
C3_04750W_A	30.1773	-0.863112	0.518936	-1.66323	0.0962657	0.410502	1.26776
C3_00640W_A	73.8647	-0.862977	0.323018	-2.6716	0.00754895	0.186258	0.959252
C6_01870C_A	73.8426	-0.862368	0.31852	-2.70742	0.00678082	0.170539	1.08811
CR_10760C_A	26.5849	-0.86231	0.52292	-1.64903	0.0991418	0.422934	1.20398
C5_03990W_A	47.0376	-0.862094	0.551291	-1.56377	0.117871	0.490722	0.976496
C7_04140C_A	47.9581	-0.861502	0.442567	-1.9466	0.0515827	0.37175	0.921892
C5_00850C_A	4.69118	-0.861443	1.32927	-0.648057	0.516948	1	0.267755
C2_08090W_A	0.205433	-0.8612	4.05205	-0.212534	0.83169	1	0.0469057
C2_03630W_A	0.205433	-0.8612	4.05205	-0.212534	0.83169	1	0.267755
C3_02530W_A	29.409	-0.860995	0.436259	-1.97359	0.0484284	0.322044	1.26776
C3_03310C_A	24.6292	-0.860128	0.649349	-1.3246	0.185303	0.602225	0.921892
C2_07350W_A	93.8949	-0.858942	0.299476	-2.86815	0.00412877	0.139591	0.956414
C3_07830W_A	125.622	-0.858897	0.369191	-2.32643	0.0199956	0.256158	0.959252
C6_00340C_A	99.4817	-0.858651	0.39531	-2.1721	0.0298483	0.268846	1.26776
CR_07130C_A	11.1913	-0.858601	0.872913	-0.983604	0.32531	1	0.0469057
CR_07140C_A	8.65071	-0.858308	1.10759	-0.774936	0.438377	1	0.267755
C1_11280W_A	119.906	-0.857832	0.34646	-2.47599	0.0132867	0.22831	0.956414
C4_00900C_A	0.290437	-0.856708	3.69904	-0.231602	0.816847	1	0.267755
C4_03350C_A	20.5418	-0.853893	0.648776	-1.31616	0.18812	0.587286	0.992938
C4_00180W_A	61.2879	-0.85382	1.48763	-0.573944	0.566005	0.924358	0.971458
C2_02900W_A	12.2202	-0.853063	0.855889	-0.996698	0.318911	1	0.267755
C3_05380W_A	40.8362	-0.851349	0.470416	-1.80978	0.0703302	0.376136	1.20398
C2_06120C_A	15.897	-0.84995	0.695149	-1.22269	0.221448	1	0.0455872
C1_08640W_A	84.0626	-0.846307	0.337936	-2.50434	0.012268	0.203275	1.08811
C1_03800W_A	11.6089	-0.843577	1.19469	-0.706106	0.480122	1	0.267755
C1_04470C_A	31.4352	-0.843537	0.475225	-1.77503	0.0758936	0.414283	0.976496
C7_04090C_A	68.1358	-0.842436	0.366232	-2.30028	0.0214326	0.238464	1.26776
CR_05960W_A	14.7818	-0.841716	0.726021	-1.15935	0.246312	1	0.0419669
C1_02290C_A	56.0459	-0.841071	0.373723	-2.25052	0.0244159	0.249827	1.26776
C3_05760W_A	79.862	-0.839529	0.423156	-1.98397	0.0472591	0.354605	0.956414
C1_11300C_A	59.222	-0.839091	0.461066	-1.8199	0.0687749	0.404014	0.959252
C1_09820C_A	0.211731	-0.837884	3.96473	-0.211334	0.832626	1	0.0455872
C2_07820C_A	55.4594	-0.83725	0.409108	-2.04653	0.0407047	0.301828	1.26776
C6_00450C_A	0.215179	-0.836513	4.05176	-0.206457	0.836434	1	0.0455872
C1_04710C_A	12.4574	-0.83557	0.866607	-0.964185	0.334953	1	0.0455872
C3_05280C_A	61.391	-0.835311	0.50631	-1.6498	0.0989834	0.464847	0.956414
C6_00960W_A	278.34	-0.83487	0.532481	-1.56789	0.116907	0.441628	1.26776
C5_04840C_A	10.5747	-0.833837	0.90503	-0.921336	0.356875	1	0.0419669
C7_00800C_A	19.0276	-0.831842	0.636984	-1.30591	0.191584	1	0.0419669
C1_03500W_A	238.335	-0.831324	0.233486	-3.56048	0.00037017	0.0403843	2.00674
C2_00680C_A	8.49504	-0.831253	1.14153	-0.728191	0.466497	1	0.267755
CR_07870W_A	22.6102	-0.831034	0.513635	-1.61795	0.105674	0.424214	1.26776
C5_00360C_A	0.419942	-0.830153	4.05168	-0.204891	0.837657	1	0.267755
C4_04470W_A	46.0667	-0.829286	0.370049	-2.24102	0.025025	0.251568	1.26776
C2_05840W_A	11.5993	-0.827936	1.52822	-0.541764	0.587981	1	0.267755
C1_05920W_A	6.00893	-0.826883	1.49806	-0.551969	0.580969	1	0.267755
C4_04210C_A	11.5453	-0.826883	1.03699	-0.797384	0.425228	1	0.267755
CR_05390W_A	589.412	-0.826015	0.266574	-3.09863	0.00194417	0.0851986	1.49658
C1_05370C_A	61.2409	-0.824313	0.360094	-2.28916	0.02207	0.267301	0.971458
C2_03490C_A	14.6955	-0.824139	0.996227	-0.82726	0.40809	1	0.0455872
C5_04540C_A	28.1436	-0.82333	0.516444	-1.59423	0.110884	0.479467	0.992938
C6_02550W_A	8.4259	-0.822892	0.996936	-0.825421	0.409133	1	0.267755
C3_04890W_A	43.2101	-0.821859	0.478342	-1.71814	0.0857712	0.403231	1.20398
C3_06480C_A	65.4174	-0.819072	0.335452	-2.4417	0.0146185	0.232962	0.959252
C5_03800W_A	58.3523	-0.818658	0.347931	-2.35293	0.0186261	0.232237	1.26776
C4_00920C_A	16.7506	-0.818037	0.746574	-1.09572	0.273201	0.850755	0.563951
C5_03530C_A	9.45867	-0.817133	0.801973	-1.0189	0.308249	1	0.267755
C3_05660C_A	0.214561	-0.816918	4.05152	-0.201632	0.840204	1	0.563951
CR_04670C_A	0.214561	-0.816918	4.05152	-0.201632	0.840204	1	0.267755
C2_08520C_A	0.214561	-0.816918	4.05152	-0.201632	0.840204	1	0.0455872
C1_08780W_A	191.269	-0.814236	0.263207	-3.09352	0.00197797	0.0764825	2.00674
C1_11500C_A	47.9374	-0.812524	0.518355	-1.56751	0.116996	0.487575	0.992938
C2_03020C_A	341.444	-0.811478	0.228026	-3.5587	0.000372693	0.0477048	1.49658
C2_06530W_A	4.68843	-0.81139	1.23174	-0.658733	0.510067	1	0.0455872
CR_01960C_A	20.5445	-0.811226	0.561334	-1.44518	0.148409	0.532374	0.992938
C3_01670W_A	51.2533	-0.809572	0.439741	-1.84102	0.0656189	0.392217	0.992938
C5_04120C_A	10.4688	-0.806579	0.887587	-0.908732	0.363492	0.964002	0.563951
C7_00460W_A	5.6956	-0.805074	1.48273	-0.542967	0.587153	1	0.267755
C1_01840C_A	65.8709	-0.804935	0.31735	-2.53643	0.011199	0.208041	0.959252
C1_10200C_A	62.8295	-0.804695	0.556975	-1.44476	0.148525	0.513631	1.08811
C2_04560W_A	30.8664	-0.803026	0.640111	-1.25451	0.209656	0.557621	1.26776
C2_04260W_A	35.3358	-0.803024	0.420507	-1.90966	0.0561772	0.371887	0.992938
C6_03840C_A	127.579	-0.80228	0.304535	-2.63444	0.00842754	0.177173	1.26776
C5_02280C_A	29.7894	-0.801971	0.572535	-1.40074	0.161293	0.569899	0.921892
C1_02830W_A	59.3354	-0.801827	0.588959	-1.36143	0.173378	0.577267	0.956414
C7_00080C_A	119.71	-0.801219	0.249137	-3.21598	0.00130001	0.0833438	1.08811
C1_01820C_A	47.9062	-0.801001	0.492894	-1.6251	0.104142	0.422934	1.26776
C3_00440W_A	8.24615	-0.799911	1.48311	-0.539346	0.589648	1	0.563951
C2_10220C_A	65.4348	-0.799343	0.380042	-2.1033	0.0354394	0.284346	1.26776
CR_01800C_A	17.049	-0.798868	1.0389	-0.768955	0.44192	1	0.0455872
C7_03260C_A	54.2452	-0.798718	0.452464	-1.76526	0.0775197	0.417379	0.976496
C1_02960C_A	93.632	-0.796416	0.284075	-2.80354	0.00505449	0.138895	1.26776
C3_06540C_A	11.6566	-0.795281	1.15462	-0.688782	0.490961	1	0.0419669
C7_00240W_A	26.7072	-0.794799	0.501702	-1.58421	0.113147	0.445194	1.20398
C7_03590C_A	37.9095	-0.794463	0.591998	-1.342	0.179595	0.580545	0.976496
C5_03980W_A	105.254	-0.794323	0.27972	-2.83971	0.00451552	0.139591	1.08811
C2_01320W_A	103.199	-0.793909	0.30289	-2.62111	0.00876428	0.194295	0.959252
C3_07430W_A	125.342	-0.792754	0.31194	-2.54137	0.0110419	0.191578	1.26776
C2_00750W_A	13.5927	-0.792305	0.733004	-1.0809	0.279741	1	0.267755
C2_03790C_A	371.684	-0.791596	0.360819	-2.19389	0.0282434	0.249113	1.49658
C3_03290C_A	32.7034	-0.791124	0.576685	-1.37185	0.170111	0.580865	0.921892
C2_01700C_A	105.144	-0.79023	0.294669	-2.68175	0.00732376	0.185536	0.956414
C5_03470C_A	62.8352	-0.789819	0.408617	-1.93291	0.0532473	0.335654	1.26776
C4_05310W_A	20.6123	-0.789653	0.555155	-1.4224	0.15491	0.545711	0.976496
C3_00750W_A	40.1856	-0.788224	0.396551	-1.9877	0.046845	0.350548	0.992938
C5_04620C_A	32.7076	-0.788147	0.432016	-1.82435	0.0680994	0.396621	0.992938
C3_00780W_A	44.0564	-0.787242	0.388214	-2.02785	0.0425752	0.306803	1.26776
C4_06100W_A	140.861	-0.786155	0.30335	-2.59157	0.00955384	0.198375	0.971458
C3_04630W_A	16.6963	-0.786126	0.599128	-1.31212	0.189481	1	0.0419669
C2_01300C_A	134.086	-0.786069	0.22089	-3.55865	0.00037277	0.0555632	0.956414
C2_03130W_A	49.5952	-0.785208	0.426567	-1.84076	0.0656564	0.392909	0.976496
C2_09920W_A	4.76524	-0.784218	1.49354	-0.525074	0.599532	1	0.0419669
C6_00210W_A	112.193	-0.78417	0.623561	-1.25757	0.208548	0.556203	1.26776
C7_01990C_A	14.6747	-0.78387	1.04201	-0.752265	0.451892	1	0.0419669
C2_03150C_A	57.2235	-0.783	0.429497	-1.82306	0.0682937	0.366913	1.26776
CR_08890C_A	1261.93	-0.782719	0.459064	-1.70503	0.0881881	0.399642	1.26776
C1_14430C_A	52.4672	-0.781344	0.382404	-2.04324	0.0410287	0.340914	0.921892
C6_01130W_A	6.12912	-0.781259	1.3392	-0.583377	0.55964	1	0.0419669
C4_04810C_A	21.6162	-0.780405	0.672949	-1.15968	0.24618	0.606977	1.20398
C4_04850C_A	16.363	-0.779154	0.577284	-1.34969	0.177116	0.975203	0.267755
C5_03850W_A	49.2979	-0.778642	0.421903	-1.84555	0.0649576	0.392217	0.976496
CR_08530C_A	0.223688	-0.774673	4.05103	-0.191229	0.848346	1	0.0455872
C6_02580W_A	111.892	-0.774597	0.520801	-1.48732	0.136931	0.47293	1.26776
C6_01690W_A	133.383	-0.773882	0.428455	-1.80621	0.0708849	0.37175	1.26776
CR_04500C_A	24.7273	-0.770407	0.586138	-1.31438	0.188719	0.542398	1.20398
CR_09010C_A	428.836	-0.769404	0.308845	-2.49123	0.0127301	0.172065	2.00674
C6_03110C_A	9.5552	-0.768918	0.784632	-0.979973	0.327099	1	0.0469057
C2_04030C_A	94.6597	-0.768027	0.25422	-3.02112	0.00251844	0.114987	0.959252
C3_01460C_A	62.8394	-0.767839	0.371548	-2.0666	0.0387723	0.326663	0.971458
C4_02040W_A	37.4076	-0.767314	0.637815	-1.20304	0.228962	0.575718	1.26776
C3_04980W_A	0.227126	-0.76664	3.87749	-0.197715	0.843268	1	0.0455872
CR_02260C_A	46.3276	-0.76662	0.539262	-1.42161	0.15514	0.492346	1.26776
C1_09280W_A	19.9076	-0.766316	0.710887	-1.07797	0.281046	0.861338	0.563951
C5_03520W_A	0.230565	-0.765694	4.05093	-0.189017	0.85008	1	0.267755
C2_05360C_A	25.3169	-0.765408	0.50443	-1.51737	0.129173	0.503758	0.992938
C4_00410W_A	63.7989	-0.765103	0.479548	-1.59547	0.110608	0.430326	1.26776
C4_03920W_A	49.6647	-0.764914	0.387152	-1.97575	0.0481835	0.326663	1.20398
C1_14480W_A	33.9746	-0.764503	0.449195	-1.70194	0.0887663	0.436312	0.992938
C1_14150C_A	32.5399	-0.764229	0.410054	-1.86373	0.0623597	0.358995	1.20398
CR_03290C_A	0.234023	-0.764219	4.05091	-0.188654	0.850364	1	0.0469057
C1_09580C_A	0.234023	-0.764219	4.05091	-0.188654	0.850364	1	0.0469057
C2_01050W_A	0.234023	-0.764219	4.05091	-0.188654	0.850364	1	0.0455872
C1_01040W_A	34.8633	-0.762728	0.536345	-1.42209	0.155001	0.542398	0.992938
C2_02240C_A	85.7176	-0.760958	0.390422	-1.94906	0.0512879	0.363223	0.971458
C1_08660C_A	36.4531	-0.760792	0.585286	-1.29986	0.193648	0.537514	1.26776
C5_03490C_A	297.75	-0.760567	0.324425	-2.34435	0.0190601	0.217225	1.49658
C1_09440W_A	30.2107	-0.760346	0.879519	-0.864502	0.387312	0.784589	0.976496
C3_06550C_A	39.2194	-0.759934	0.442255	-1.71832	0.0857385	0.393706	1.26776
C2_10160W_A	8.8162	-0.759221	1.32821	-0.57161	0.567586	1	0.0455872
C2_06890C_A	275.987	-0.758898	0.304285	-2.49404	0.0126298	0.189785	1.49658
C6_00800C_A	178.693	-0.758745	0.420683	-1.8036	0.0712935	0.371874	1.26776
C1_07950C_A	19.9942	-0.757608	0.609871	-1.24224	0.214147	1	0.0469057
C2_01970C_A	118.759	-0.75756	0.380499	-1.99096	0.0464849	0.335965	1.08811
C4_01630C_A	2.4925	-0.757004	1.57957	-0.479247	0.631763	1	0.0455872
C1_12830C_A	101.644	-0.756587	0.296255	-2.55384	0.0106542	0.200736	0.971458
C1_03720C_A	75.9756	-0.7551	0.321437	-2.34914	0.018817	0.251299	0.959252
CR_09100C_A	54.6941	-0.754868	0.566368	-1.33282	0.18259	0.523957	1.26776
C1_13740W_A	42.5998	-0.75483	0.379436	-1.98935	0.0466629	0.317746	1.26776
C2_04300C_A	38.966	-0.753936	0.503227	-1.4982	0.134081	0.512545	0.992938
C1_07590C_A	111.484	-0.751408	0.325507	-2.30843	0.0209754	0.249827	1.08811
C3_02140C_A	347.078	-0.751276	0.469875	-1.59889	0.109846	0.367924	2.00674
C5_03680W_A	94.2058	-0.749658	0.316888	-2.36569	0.0179965	0.231433	1.26776
C4_06410W_A	29.6867	-0.749278	0.502678	-1.49057	0.136074	0.518017	0.976496
C5_03730W_A	0.233414	-0.74823	4.05073	-0.184715	0.853453	1	0.0469057
C1_02590C_A	366.914	-0.748157	0.261405	-2.86206	0.00420899	0.118897	1.49658
C3_02850C_A	16.7542	-0.747098	0.667217	-1.11972	0.262832	1	0.0469057
C4_03190W_A	41.8274	-0.745079	0.439077	-1.69692	0.0897118	0.402398	1.26776
C6_03790C_A	1346.57	-0.744037	0.298153	-2.49549	0.0125784	0.189785	1.49658
C2_06750C_A	24.4983	-0.743918	0.463933	-1.6035	0.108823	0.475465	0.992938
C1_02040C_A	424.603	-0.743566	0.26119	-2.84684	0.00441549	0.128835	1.26776
C1_01740W_A	17.0591	-0.743168	0.981036	-0.757534	0.44873	1	0.267755
C1_08610C_A	658.583	-0.742418	0.387846	-1.91421	0.0555934	0.338705	1.26776
C1_08260C_A	82.6518	-0.742131	0.372594	-1.99179	0.0463936	0.353048	0.956414
C5_01930W_A	36.1717	-0.741416	0.508069	-1.45928	0.144488	0.542398	0.921892
CR_02230W_A	0.350072	-0.740248	4.05064	-0.182748	0.854995	1	0.0455872
C1_10110W_A	24.3686	-0.740025	0.724214	-1.02183	0.30686	0.655955	1.20398
C1_07570C_A	12.0219	-0.739301	1.14471	-0.645839	0.518384	1	0.267755
C1_11950W_A	10.809	-0.738736	1.02616	-0.719905	0.471583	1	0.0419669
C4_03900C_A	23.2457	-0.737974	0.666443	-1.10733	0.268151	0.691127	0.921892
C3_05140C_A	37.6945	-0.737241	0.543181	-1.35727	0.174697	0.524056	1.20398
C4_02520C_A	31.7548	-0.736189	0.508918	-1.44658	0.148015	0.48743	1.26776
C1_11990W_A	90.1771	-0.736129	0.332367	-2.2148	0.0267735	0.284346	0.956414
C1_02840W_A	77.5079	-0.735717	0.391353	-1.87993	0.0601175	0.386355	0.956414
C4_05620C_A	26.3714	-0.735537	0.719019	-1.02297	0.306321	0.643696	1.26776
C2_04610C_A	0.291439	-0.735351	4.05058	-0.181542	0.855942	1	0.0469057
C5_03760C_A	137.505	-0.735234	0.27458	-2.67766	0.00741377	0.177411	1.08811
C4_04280C_A	11.5905	-0.734433	0.771947	-0.951403	0.3414	0.936393	0.563951
C1_03640C_A	27.2604	-0.734335	0.645277	-1.13801	0.255115	0.663547	0.976496
C1_10690W_A	35.8108	-0.734246	0.708836	-1.03585	0.300273	0.650448	1.20398
C2_07760W_A	55.9848	-0.731696	0.355675	-2.0572	0.0396667	0.330393	0.971458
C4_06990W_A	42.4303	-0.730942	0.475786	-1.53628	0.124469	0.496398	0.992938
C5_00440C_A	90.4849	-0.728788	0.380096	-1.91738	0.0551899	0.374798	0.959252
CR_07930C_A	0.236244	-0.728313	4.0505	-0.179808	0.857303	1	0.267755
C4_07050W_A	162.782	-0.727004	0.304711	-2.38589	0.0170381	0.189785	2.04559
C1_12550C_A	31.6404	-0.726139	0.621156	-1.16901	0.242399	0.666034	0.921892
C1_12900W_A	34.827	-0.7261	0.495295	-1.46599	0.14265	0.523957	0.992938
C2_09370C_A	22.623	-0.725743	0.54038	-1.34302	0.179265	0.521377	1.26776
C5_03120W_A	29.7358	-0.725601	0.553579	-1.31075	0.189944	0.543616	1.20398
C2_07040W_A	18.0937	-0.725476	0.882316	-0.82224	0.41094	1	0.267755
C7_02910W_A	713.561	-0.724178	0.266453	-2.71784	0.00657088	0.124141	2.04559
C3_04730C_A	0.239672	-0.722334	4.05044	-0.178335	0.85846	1	0.0469057
C2_08850C_A	83.2284	-0.722041	0.331774	-2.17631	0.0295324	0.279485	1.08811
C3_04600C_A	0.24314	-0.722036	4.05043	-0.178261	0.858518	1	0.0419669
C2_10570W_A	89.979	-0.721347	0.326625	-2.20848	0.0272105	0.284346	0.971458
C1_02200C_A	28.6715	-0.720571	0.575196	-1.25274	0.2103	0.569841	1.20398
C7_01930C_A	51.3694	-0.720046	0.580865	-1.23961	0.21512	0.573775	1.20398
CR_09410W_A	41.2832	-0.718147	0.452575	-1.5868	0.112558	0.485256	0.976496
C3_05360C_A	241.771	-0.716418	0.344021	-2.08249	0.037298	0.246627	2.00674
C1_00320W_A	53.3684	-0.715905	0.472185	-1.51615	0.129481	0.472915	1.20398
C4_02950C_A	18.4429	-0.715828	0.593626	-1.20586	0.227873	1	0.0469057
C4_04080C_A	141.403	-0.715345	0.589145	-1.21421	0.224668	0.638665	0.959252
C1_06590C_A	163.37	-0.714818	0.297621	-2.40177	0.0163159	0.188076	2.00674
C1_07880C_A	196.638	-0.714672	0.210858	-3.38936	0.000700572	0.0651441	1.26776
CR_05690W_A	29.7271	-0.714616	0.605682	-1.17985	0.238058	0.659558	0.921892
C2_01260W_A	45.0413	-0.714103	0.459396	-1.55444	0.12008	0.503758	0.921892
C1_06810W_A	843.697	-0.712926	0.345857	-2.06133	0.0392714	0.270521	1.57692
C6_02970C_A	32.8811	-0.71182	0.475509	-1.49696	0.134403	0.51308	0.992938
C3_04690C_A	24.0927	-0.709687	0.663343	-1.06986	0.284681	0.631143	1.26776
C3_01050C_A	0.242532	-0.707184	4.05027	-0.174602	0.861393	1	0.0469057
C6_00890W_A	346.911	-0.706923	0.474929	-1.48848	0.136624	0.47293	1.26776
CR_06180W_A	241.494	-0.706328	0.277702	-2.54347	0.0109757	0.191578	1.26776
C2_00640W_A	20.9832	-0.706213	0.712323	-0.991423	0.321479	0.745859	0.921892
C3_07770C_A	37.4633	-0.70378	0.462828	-1.52061	0.128358	0.505505	0.976496
C7_02020W_A	59.2624	-0.702794	0.387004	-1.81599	0.0693721	0.405699	0.956414
CR_00330C_A	96.5175	-0.701959	0.307119	-2.28562	0.0222763	0.268846	0.956414
C7_03170W_A	42.7231	-0.701512	0.502592	-1.39579	0.162778	0.555342	0.992938
C1_05860W_A	25.5147	-0.699916	0.580461	-1.20579	0.227897	0.638146	0.976496
C1_12990W_A	10.8993	-0.698394	0.684036	-1.02099	0.307259	0.896838	0.563951
CR_09610C_A	65.6897	-0.697415	0.39477	-1.76664	0.0772893	0.417379	0.971458
C3_07370W_A	41.6111	-0.696622	0.468717	-1.48623	0.137217	0.47293	1.26776
CR_02900W_A	0.24597	-0.69635	3.74663	-0.18586	0.852554	1	0.267755
C2_02390W_A	82.7079	-0.69518	0.305858	-2.27289	0.0230329	0.269959	0.959252
C1_02700C_A	300.584	-0.693815	0.433925	-1.59893	0.109836	0.367924	2.00674
CR_08700C_A	66.5672	-0.693531	0.40496	-1.71259	0.0867874	0.438771	0.959252
C2_06040C_A	23.2769	-0.693373	0.500319	-1.38586	0.165789	0.575629	0.921892
CR_05900W_A	32.4528	-0.692881	0.471187	-1.4705	0.141426	0.524056	0.976496
CR_05860W_A	39.6909	-0.691244	0.458161	-1.50874	0.131366	0.464847	1.26776
C5_03460C_A	29.2199	-0.691225	0.497436	-1.38958	0.164658	0.513691	1.20398
C3_03510C_A	132.26	-0.690972	0.330081	-2.09334	0.0363186	0.287104	1.26776
C4_04970C_A	50.0945	-0.690574	0.533521	-1.29437	0.195537	0.615514	0.921892
C5_02010C_A	48.8315	-0.689216	0.449566	-1.53307	0.125258	0.51308	0.921892
C6_01140C_A	55.6455	-0.687049	0.485035	-1.41649	0.156631	0.555342	0.956414
C7_02180C_A	61.0449	-0.686346	0.357677	-1.9189	0.0549969	0.374798	0.956414
C6_02320C_A	48.2174	-0.686103	0.378785	-1.81133	0.0700901	0.375647	1.20398
CR_02120C_A	21.5766	-0.685628	0.607196	-1.12917	0.258826	0.606644	1.26776
C6_03330C_A	94.4393	-0.685472	0.390619	-1.75484	0.079287	0.422934	0.959252
CR_07740W_A	6.07273	-0.685133	1.70285	-0.402345	0.68743	1	0.0419669
C3_03840C_A	75.1745	-0.685044	0.378651	-1.80917	0.0704248	0.370841	1.26776
C4_02360W_A	486.937	-0.68383	0.471623	-1.44995	0.147073	0.443927	1.57692
C5_02800C_A	0.2488	-0.683709	4.05001	-0.168817	0.865941	1	0.563951
C4_02930W_A	10.6277	-0.682594	0.94258	-0.724177	0.468957	1	0.267755
C4_03910W_A	20.2488	-0.682084	0.609478	-1.11913	0.263085	0.66793	0.992938
C7_02300W_A	132.573	-0.681507	0.252434	-2.69974	0.00693943	0.178823	0.971458
CR_04050C_A	118.146	-0.681426	0.284293	-2.39691	0.0165339	0.232962	1.08811
C1_04060W_A	35.8417	-0.680836	0.523435	-1.30071	0.193359	0.594778	0.992938
C1_11870W_A	370.614	-0.680686	0.229644	-2.96409	0.00303579	0.0918279	2.04559
C7_00760C_A	9.7853	-0.680511	0.830403	-0.819495	0.412504	1	0.0455872
CR_07180W_A	117.818	-0.6803	0.240697	-2.82637	0.00470782	0.139591	1.08811
C6_01960W_A	43.4282	-0.679215	0.540835	-1.25586	0.209166	0.568534	1.20398
C5_04710W_A	37.3958	-0.679137	0.435541	-1.55929	0.118927	0.491487	0.976496
C6_03590C_A	65.8637	-0.678959	0.510209	-1.33075	0.183272	0.589687	0.956414
C4_00950C_A	102.098	-0.676874	0.322977	-2.09574	0.0361056	0.28683	1.26776
C6_01370W_A	121.095	-0.675984	0.331596	-2.03858	0.0414922	0.335965	0.971458
C4_04570W_A	60.2971	-0.675711	0.366524	-1.84356	0.065247	0.395266	0.956414
C4_05730W_A	70.9575	-0.674479	0.51965	-1.29795	0.194305	0.599551	0.971458
C4_03770W_A	17.4106	-0.673973	0.702267	-0.959711	0.337201	0.934307	0.563951
C7_01910C_A	11.1124	-0.672619	0.980182	-0.686218	0.492575	1	0.0455872
C5_02380W_A	2253.34	-0.672037	0.269706	-2.49174	0.0127118	0.170539	2.04559
C1_05030C_A	38.6469	-0.671757	0.55263	-1.21556	0.224151	0.635185	0.976496
C4_04760C_A	47.4574	-0.670131	0.382134	-1.75366	0.0794896	0.421097	0.976496
C2_00340C_A	378.522	-0.670117	0.356752	-1.87838	0.060329	0.322044	1.57692
CR_10170C_A	40.3912	-0.669924	0.596245	-1.12357	0.261195	0.666053	0.992938
C2_00630C_A	21.1978	-0.669759	0.7219	-0.927772	0.353526	0.755722	0.992938
C3_07900C_A	33.5142	-0.669709	0.516995	-1.29539	0.195186	0.615101	0.921892
C4_04120C_A	77.1319	-0.669692	0.319274	-2.09755	0.0359451	0.320386	0.959252
C4_05190C_A	52.8703	-0.668642	0.428008	-1.56222	0.118237	0.490834	0.976496
C4_02720C_A	88.0299	-0.667328	0.31222	-2.13737	0.0325682	0.307878	0.956414
C4_05170C_A	34.5607	-0.66654	0.606995	-1.0981	0.272161	0.633025	1.20398
C6_02010C_A	3659.91	-0.665238	0.3463	-1.92099	0.0547333	0.317746	1.49658
C2_05080C_A	13.9084	-0.665173	0.789214	-0.842829	0.399324	1	0.0419669
C5_05300W_A	146.283	-0.664781	0.250986	-2.64868	0.00808064	0.138895	2.04559
CR_09170C_A	33.7803	-0.663555	0.48533	-1.36722	0.171555	0.522612	1.20398
CR_05490W_A	16.1656	-0.663309	0.621137	-1.06789	0.285568	0.867054	0.563951
C2_05180W_A	5472.57	-0.662968	0.747835	-0.886515	0.37534	0.696642	1.26776
C2_03200W_A	26.71	-0.662335	0.462069	-1.43341	0.15174	0.488744	1.26776
C1_07810C_A	21.4985	-0.662255	0.609368	-1.08679	0.277129	0.684187	0.976496
C1_02990C_A	51.5132	-0.661807	0.442764	-1.49472	0.134988	0.51666	0.976496
C1_05400C_A	21.6839	-0.661415	0.787105	-0.840314	0.400732	0.730638	1.20398
C7_01230C_A	142.46	-0.66121	0.298528	-2.21491	0.0267665	0.221193	2.04559
C3_05570W_A	95.5367	-0.661134	0.383294	-1.72487	0.0845503	0.414283	1.08811
C4_06120W_A	413.186	-0.661026	0.389549	-1.6969	0.0897156	0.372466	1.57692
C5_00700C_A	27.5851	-0.660951	0.934117	-0.707568	0.479214	0.878299	0.921892
C1_14060W_A	645.123	-0.660607	0.391948	-1.68545	0.0919024	0.405699	1.26776
C3_01880W_A	51.5454	-0.66041	0.359727	-1.83586	0.0663781	0.370164	1.20398
C2_06430C_A	31.9203	-0.660191	0.60032	-1.09973	0.271449	0.676825	0.992938
C5_03960W_A	80.6406	-0.659661	0.352995	-1.86875	0.0616572	0.388207	0.971458
C1_01610C_A	36.6909	-0.657983	0.466182	-1.41143	0.158119	0.552057	0.976496
C1_03820W_A	112.346	-0.656219	0.417746	-1.57085	0.116216	0.440821	1.26776
C7_03440W_A	88.5112	-0.656012	0.320975	-2.04381	0.0409725	0.335965	0.959252
CR_05480W_A	108.887	-0.655516	0.336672	-1.94705	0.0515291	0.330393	1.26776
C4_03540C_A	22.1716	-0.654515	0.566213	-1.15595	0.247701	0.650448	0.992938
CR_07170W_A	18.9242	-0.653988	0.634178	-1.03124	0.30243	1	0.267755
C3_04290C_A	96.6349	-0.65393	0.281145	-2.32595	0.020021	0.234634	1.26776
C1_11430W_A	14.1013	-0.653845	0.786251	-0.831598	0.405636	1	0.0455872
C4_03150W_A	73.2689	-0.652862	0.363869	-1.79422	0.0727782	0.392217	1.08811
C2_06700W_A	78.9581	-0.652244	0.36753	-1.77467	0.0759525	0.414592	0.971458
C3_00120W_A	0.327516	-0.651188	3.57308	-0.182249	0.855388	1	0.267755
C3_04800C_A	95.8508	-0.651086	0.346273	-1.88027	0.0600716	0.383662	0.971458
C5_03650C_A	3.88919	-0.650898	1.60831	-0.40471	0.685691	1	0.267755
CR_06560C_A	91.947	-0.650551	0.399577	-1.6281	0.103504	0.447167	1.08811
C2_04320W_A	21.9496	-0.65027	0.648345	-1.00297	0.315875	0.73879	0.921892
C2_04540C_A	45.3256	-0.650236	0.410737	-1.58309	0.1134	0.486917	0.976496
C1_01620C_A	15.2744	-0.650235	0.874249	-0.743764	0.457019	1	0.0419669
CR_05770W_A	30.1564	-0.650007	0.53838	-1.20734	0.227302	0.635185	0.992938
C7_03500W_A	39.5661	-0.649909	0.515729	-1.26018	0.207606	0.555342	1.26776
C5_02320C_A	42.2781	-0.649807	0.447694	-1.45145	0.146654	0.485698	1.26776
C6_00240C_A	91.9821	-0.649246	0.451363	-1.43841	0.150317	0.542889	0.956414
C3_03710W_A	71.5765	-0.646337	0.317154	-2.03793	0.0415571	0.337137	0.959252
C5_02200W_A	0.261375	-0.643252	4.04958	-0.158844	0.873792	1	0.0469057
C2_09140C_A	179.881	-0.642729	0.446413	-1.43976	0.149934	0.487575	1.26776
C3_00540C_A	26.9697	-0.642597	0.494275	-1.30008	0.193574	0.598254	0.976496
C1_02530C_A	714.903	-0.642208	0.249482	-2.57417	0.0100481	0.151313	2.04559
C3_00520W_A	36.3622	-0.641986	0.504339	-1.27292	0.203045	0.610453	0.976496
CR_00200W_A	319.946	-0.641202	0.188757	-3.39698	0.00068135	0.0547523	2.04559
C2_07930C_A	133.264	-0.641048	0.376041	-1.70473	0.088245	0.440907	0.959252
C2_10200W_A	81.9953	-0.641041	0.409486	-1.56548	0.117471	0.47293	1.08811
C2_03110W_A	45.1406	-0.640813	0.501371	-1.27812	0.201207	0.603581	0.992938
CR_02280W_A	93.3731	-0.639644	0.363342	-1.76045	0.0783319	0.41942	0.971458
CR_03350C_A	47.6804	-0.639116	0.362034	-1.76535	0.0775052	0.390706	1.20398
C6_01640W_A	38.0145	-0.638753	0.402485	-1.58702	0.112507	0.492172	0.921892
C6_01790C_A	78.24	-0.63765	0.366253	-1.74101	0.0816819	0.426803	0.959252
C3_02720W_A	18.1166	-0.63758	0.599478	-1.06356	0.287528	1	0.267755
C1_08680C_A	55.6683	-0.636705	0.329929	-1.92982	0.0536285	0.37175	0.956414
C7_03630C_A	25.8673	-0.636511	0.470262	-1.35353	0.175888	0.575629	0.976496
CR_03000C_A	63.626	-0.636462	0.457647	-1.39073	0.164308	0.56634	0.959252
C7_01760C_A	68.7602	-0.636404	0.412185	-1.54398	0.122594	0.480285	1.08811
CR_07770C_A	68.8551	-0.635956	0.396587	-1.60357	0.108808	0.483305	0.956414
C2_07450C_A	52.0343	-0.635895	0.508239	-1.25117	0.210872	0.615514	0.992938
C2_05260W_A	74.2325	-0.635486	0.290837	-2.18502	0.0288871	0.277593	1.08811
C4_06750C_A	0.261365	-0.633519	3.71679	-0.170448	0.864658	1	0.0455872
C2_01730W_A	7.9641	-0.632985	0.964866	-0.656034	0.511802	1	0.267755
CR_03740C_A	55.7394	-0.632658	0.376383	-1.68089	0.092784	0.407557	1.26776
C3_07120W_A	12.5921	-0.631863	0.911992	-0.692839	0.488411	1	0.267755
C2_09690C_A	48.9845	-0.631123	0.407446	-1.54897	0.121388	0.506052	0.921892
C7_02270W_A	39.8673	-0.630839	0.668745	-0.943318	0.345518	0.766082	0.921892
C4_02130W_A	19.9332	-0.629943	0.601786	-1.04679	0.295197	1	0.0455872
C7_02430C_A	30.3028	-0.629282	0.484849	-1.29789	0.194325	0.614133	0.921892
C3_03110W_A	35.9404	-0.628578	0.492737	-1.27569	0.202066	0.609745	0.976496
CR_03220C_A	20.3417	-0.628095	0.638975	-0.982974	0.32562	0.657929	1.26776
C2_09590C_A	231.974	-0.626804	0.291199	-2.1525	0.0313584	0.270443	1.26776
C2_02700C_A	26.5234	-0.626054	0.531515	-1.17787	0.238849	0.598254	1.20398
C1_11210C_A	61.619	-0.624114	0.395142	-1.57947	0.114229	0.48743	0.971458
C1_04640W_A	60.1033	-0.623207	0.511134	-1.21926	0.222744	0.635185	0.971458
C2_05380W_A	46.3093	-0.62316	0.385511	-1.61645	0.105997	0.473528	0.976496
C2_09780C_A	169.626	-0.622737	0.244741	-2.54447	0.0109443	0.160728	2.00674
CR_08760C_A	15.329	-0.62184	0.841262	-0.739175	0.459801	1	0.0419669
CR_01280C_A	39.2459	-0.621055	0.451119	-1.3767	0.168606	0.509393	1.26776
CR_02370W_A	38.628	-0.620687	0.578553	-1.07283	0.283349	0.690747	0.976496
C3_01020W_A	47.3976	-0.62038	0.402371	-1.54181	0.12312	0.496818	0.976496
CR_05380C_A	325.022	-0.619049	0.320019	-1.93441	0.0530625	0.306951	1.57692
CR_06450W_A	19.4181	-0.618991	0.643024	-0.962625	0.335736	1	0.0469057
C1_14270W_A	21.9596	-0.618241	0.595684	-1.03787	0.299332	0.640341	1.26776
C4_04140W_A	51.4215	-0.617512	0.500046	-1.23491	0.216864	0.623619	0.992938
C2_06370C_A	6.27109	-0.61738	0.978576	-0.630896	0.528108	1	0.267755
CR_01190C_A	31.7027	-0.615	0.7136	-0.861827	0.388783	0.706767	1.26776
C1_03830C_A	36.1237	-0.614648	0.504977	-1.21718	0.223535	0.644697	0.921892
C1_09760C_A	68.5301	-0.613714	0.397213	-1.54505	0.122334	0.480016	1.08811
C2_00320W_A	63.3546	-0.613236	0.344902	-1.778	0.0754033	0.414283	0.971458
CR_00910W_A	1254.47	-0.611852	0.276768	-2.21071	0.027056	0.238464	1.57692
C6_02230W_A	63.1264	-0.61166	0.361081	-1.69397	0.0902708	0.423657	1.08811
CR_04800W_A	18.8598	-0.611094	0.5654	-1.08082	0.279779	1	0.267755
C2_10080W_A	64.887	-0.609947	0.328477	-1.85689	0.0633265	0.375647	1.08811
C3_02150C_A	171.773	-0.609185	0.423957	-1.4369	0.150745	0.407557	2.04559
C1_10380C_A	105.179	-0.608607	0.305987	-1.989	0.0467015	0.352909	0.971458
C1_07640C_A	54.6999	-0.607545	0.326437	-1.86114	0.0627246	0.354605	1.26776
C2_06250C_A	35.2387	-0.60735	0.46324	-1.31109	0.189826	0.532716	1.26776
C4_06000W_A	35.9161	-0.606979	0.448451	-1.3535	0.175895	0.51666	1.26776
C6_04420W_A	158.813	-0.606208	0.322883	-1.87748	0.0604519	0.292659	2.04559
C3_05070W_A	29.8065	-0.605709	0.64589	-0.93779	0.348352	0.75613	0.976496
C1_06220C_A	0.270483	-0.605122	4.04918	-0.149443	0.881204	1	0.267755
C4_05560C_A	21.5447	-0.605046	0.821244	-0.736743	0.461279	0.842044	0.992938
C2_05150W_A	64.403	-0.603144	0.404317	-1.49176	0.135762	0.521377	0.959252
C1_00870W_A	184.59	-0.602646	0.267023	-2.25691	0.024014	0.210188	2.00674
C4_06440C_A	56.7521	-0.602085	0.384962	-1.56401	0.117815	0.492346	0.959252
C1_13400C_A	58.3876	-0.601297	0.445824	-1.34873	0.177423	0.581818	0.956414
C2_05950C_A	11.294	-0.60078	1.07228	-0.56028	0.575288	1	0.0455872
C3_01100W_A	57.292	-0.600691	0.426074	-1.40983	0.158591	0.55534	0.971458
C2_06520C_A	11.1444	-0.600526	1.2428	-0.483203	0.628952	1	0.0455872
CR_03860C_A	127.748	-0.600493	0.248033	-2.42102	0.0154769	0.234964	0.956414
C6_01190C_A	124.726	-0.600346	0.437781	-1.37134	0.170269	0.51137	1.26776
CR_05560W_A	63.8931	-0.599337	0.387806	-1.54546	0.122236	0.498809	0.959252
C5_04210C_A	0.273911	-0.599289	4.04912	-0.148005	0.882339	1	0.0419669
C1_06880C_A	0.273911	-0.599289	4.04912	-0.148005	0.882339	1	0.0419669
CR_03050C_A	54.9473	-0.599262	0.439092	-1.36477	0.172324	0.51308	1.26776
C4_02420C_A	28.429	-0.59809	0.528131	-1.13247	0.257439	0.666977	0.976496
C2_06060C_A	0.277369	-0.596969	4.0491	-0.147433	0.882791	1	0.0455872
C7_01320W_A	123.15	-0.596066	0.325913	-1.82891	0.0674125	0.364202	1.26776
C1_10080W_A	25.0988	-0.595172	0.640761	-0.928851	0.352966	0.754788	0.992938
C7_04100C_A	34.5354	-0.595074	0.438485	-1.35711	0.174745	0.516503	1.26776
C1_12430W_A	98.1501	-0.595031	0.263828	-2.25537	0.0241099	0.270521	0.956414
C1_00450C_A	57.921	-0.594673	0.37859	-1.57076	0.116239	0.472132	1.08811
C3_05630W_A	0.280828	-0.594625	4.04907	-0.146855	0.883247	1	0.563951
C4_00360C_A	24.2377	-0.59459	0.698948	-0.850692	0.394941	0.784998	0.992938
C1_04980C_A	99.812	-0.594227	0.355192	-1.67298	0.0943322	0.430326	1.08811
C3_05900W_A	19.5112	-0.593728	0.862019	-0.688765	0.490971	1	0.0469057
C1_02880C_A	86.935	-0.592294	0.331527	-1.78657	0.0740078	0.414121	0.959252
C7_02230W_A	0.277379	-0.591577	3.7142	-0.159274	0.873453	1	0.0469057
C6_03320W_A	413.052	-0.591397	0.224686	-2.6321	0.00848583	0.159358	1.57692
CR_07340C_A	67.0267	-0.590822	0.351135	-1.6826	0.0924518	0.451056	0.959252
CR_03500W_A	410.333	-0.590133	0.299244	-1.97208	0.0486007	0.268846	2.04559
C2_04830W_A	12.9595	-0.589998	0.70335	-0.838839	0.401559	1	0.267755
C4_02600C_A	61.7014	-0.589339	0.424283	-1.38902	0.164826	0.566904	0.956414
C1_05810W_A	64.9179	-0.588562	0.367327	-1.60228	0.109093	0.483305	0.956414
C1_02090C_A	21.5477	-0.588212	0.642597	-0.915367	0.359999	0.75807	0.992938
C6_02650C_A	65.9862	-0.587999	0.46116	-1.27504	0.202294	0.547068	1.26776
C2_01190C_A	29.3721	-0.587976	0.588449	-0.999197	0.317699	0.741228	0.921892
C3_07710W_A	83.5493	-0.587813	0.347351	-1.69227	0.0905937	0.403721	1.26776
C2_01890W_A	33.2654	-0.587114	0.441344	-1.33029	0.183424	0.536719	1.20398
C1_10120C_A	91.0724	-0.58687	0.259467	-2.26183	0.0237081	0.270443	0.971458
C4_05160C_A	36.7931	-0.585489	0.401139	-1.45957	0.144409	0.483305	1.26776
C5_00940C_A	45.3537	-0.584794	0.377212	-1.55031	0.121068	0.493843	0.976496
C1_10550C_A	61.4561	-0.584543	0.62815	-0.930579	0.352071	0.75807	0.971458
C5_03920C_A	33.6762	-0.584194	0.445012	-1.31276	0.189264	0.542889	1.20398
C3_06320W_A	44.138	-0.583848	0.402012	-1.45231	0.146415	0.491405	1.20398
C6_02130C_A	16.925	-0.583818	0.707701	-0.82495	0.4094	1	0.0469057
C5_01480W_A	9.31115	-0.582965	1.37423	-0.424213	0.67141	1	0.267755
CR_10770W_A	0.280219	-0.582541	4.04895	-0.143874	0.8856	1	0.267755
C1_01160C_A	34.7296	-0.580864	0.53525	-1.08522	0.277824	0.635741	1.20398
C6_03540W_A	82.0746	-0.580612	0.363745	-1.59621	0.110443	0.430326	1.26776
CR_01090W_A	121.576	-0.580358	0.285753	-2.03098	0.0422572	0.323015	1.08811
CR_04280C_A	53.3352	-0.57968	0.337756	-1.71627	0.0861133	0.403721	1.20398
C4_00400W_A	228.275	-0.579613	0.252915	-2.29173	0.0219213	0.200736	2.04559
C3_07200C_A	23.1451	-0.579557	0.568186	-1.02001	0.307723	0.656651	1.20398
C2_04210W_A	13.0833	-0.579518	1.16865	-0.495887	0.619974	1	0.0455872
C2_08480W_A	30.947	-0.579209	0.632071	-0.916366	0.359475	0.761266	0.976496
C3_02420C_A	12.2698	-0.57895	0.865387	-0.669006	0.503491	1	0.0455872
CR_03270W_A	8.01047	-0.577065	1.21301	-0.475731	0.634266	1	0.0455872
C6_03650C_A	115.735	-0.576587	0.412746	-1.39695	0.162428	0.564564	0.956414
CR_06060W_A	59.118	-0.576494	0.367009	-1.57079	0.116231	0.488744	0.971458
C2_09750W_A	339.571	-0.575537	0.229744	-2.50512	0.0122409	0.188492	1.49658
C1_12730W_A	67.5815	-0.575531	0.407602	-1.41199	0.157952	0.524056	1.08811
C2_08140C_A	688.23	-0.575111	0.227893	-2.52361	0.0116158	0.186258	1.49658
C1_03330C_A	50.9795	-0.575026	0.380903	-1.50964	0.131136	0.474534	1.20398
C3_06150W_A	71.2743	-0.573617	0.3185	-1.801	0.0717035	0.410057	0.956414
C6_02850W_A	58.2932	-0.572834	0.502254	-1.14052	0.254068	0.668308	0.956414
CR_10710C_A	48.0054	-0.572616	0.407249	-1.40606	0.159707	0.508848	1.20398
CR_02160W_A	95.6948	-0.572581	0.372754	-1.53608	0.124518	0.483361	1.08811
CR_02630C_A	20.9008	-0.571907	0.609267	-0.93868	0.347895	0.689002	1.20398
C4_02500C_A	49.845	-0.571863	0.475072	-1.20374	0.22869	0.649242	0.921892
C3_01320C_A	148.357	-0.570938	0.234599	-2.43368	0.0149463	0.196953	1.57692
C1_04680W_A	3247.53	-0.570857	0.265156	-2.15291	0.0313258	0.270443	1.26776
C4_00090W_A	0.27961	-0.570803	4.04883	-0.14098	0.887886	1	0.0455872
CR_06170W_A	107.58	-0.569832	0.377496	-1.50951	0.13117	0.514828	0.956414
C5_02220C_A	13.2911	-0.569289	0.765346	-0.743832	0.456978	1	0.0419669
C3_00500C_A	26.586	-0.569235	0.66438	-0.856791	0.391561	0.724421	1.20398
C7_01520W_A	58.1838	-0.569167	0.530962	-1.07195	0.283741	0.629925	1.26776
C4_02900C_A	527.371	-0.568871	0.217979	-2.60975	0.00906077	0.178823	1.26776
C5_02570W_A	18.3302	-0.568555	0.573841	-0.990789	0.321789	0.915674	0.563951
C5_01080C_A	338.868	-0.568172	0.190954	-2.97544	0.00292573	0.0999146	1.49658
C3_06350W_A	40.371	-0.567967	0.464941	-1.22159	0.221863	0.569899	1.26776
C5_04150C_A	19.2352	-0.56784	0.665778	-0.852898	0.393716	1	0.267755
C4_05960W_A	122.402	-0.567349	0.358866	-1.58095	0.113889	0.466626	1.08811
C2_02410W_A	342.999	-0.567336	0.342276	-1.65754	0.0974099	0.412803	1.26776
C7_02940C_A	51.7878	-0.567319	0.348309	-1.62878	0.10336	0.480016	0.921892
C2_01710W_A	34.5232	-0.566308	0.505397	-1.12052	0.262492	0.609745	1.26776
C1_06030C_A	11.615	-0.565767	0.745055	-0.759363	0.447636	1	0.0419669
CR_06290C_A	81.9929	-0.565512	0.517327	-1.09314	0.274332	0.653206	1.08811
CR_07110C_A	27.6714	-0.565129	0.537842	-1.05073	0.293381	0.700005	0.976496
C4_05040W_A	9.29418	-0.564455	0.812127	-0.695033	0.487034	1	0.563951
C2_09150W_A	174.667	-0.563757	0.30534	-1.84633	0.0648444	0.357336	1.26776
CR_05120W_A	139.243	-0.563368	0.271619	-2.07412	0.0380686	0.326663	0.956414
C1_02500W_A	31.5694	-0.563363	0.450071	-1.25172	0.210672	0.558479	1.26776
C1_12370W_A	39.944	-0.56293	0.618439	-0.910243	0.362694	0.759799	0.992938
C1_10710C_A	64.9606	-0.562354	0.371652	-1.51312	0.130249	0.51308	0.959252
C7_00280W_A	5.45568	-0.56172	1.37082	-0.40977	0.681974	1	0.0419669
C1_09260C_A	81.6984	-0.561183	0.32883	-1.70661	0.0878949	0.440821	0.959252
C2_06280C_A	11.9928	-0.560829	1.03319	-0.542812	0.587259	1	0.563951
C4_01510W_A	151.4	-0.560824	0.265125	-2.11532	0.0344029	0.279485	1.26776
CR_08920W_A	40.4829	-0.56058	0.438491	-1.27843	0.201098	0.560108	1.20398
C1_11660W_A	1469.37	-0.55992	0.190492	-2.93934	0.00328912	0.114987	1.26776
C7_01340W_A	72.5554	-0.558792	0.292027	-1.9135	0.0556846	0.375647	0.959252
C2_03690C_A	41.2665	-0.558631	0.493698	-1.13152	0.257834	0.682864	0.921892
C2_01860C_A	26.1384	-0.558538	0.632776	-0.882678	0.37741	0.776991	0.976496
C2_08030W_A	0.289935	-0.557901	4.0487	-0.137798	0.8904	1	0.0455872
C1_04660W_A	118.236	-0.557702	0.599017	-0.931028	0.351839	0.75807	0.971458
C6_02540C_A	126.225	-0.556785	0.447307	-1.24475	0.213224	0.561244	1.26776
C3_03390C_A	28.4407	-0.556465	0.580228	-0.959045	0.337536	0.760383	0.921892
CR_05620C_A	24.1565	-0.556135	0.695292	-0.799858	0.423793	0.749877	1.20398
C4_05740C_A	234.856	-0.555871	0.263132	-2.11251	0.0346424	0.238464	2.00674
C1_10960W_A	35.6687	-0.555863	0.500296	-1.11107	0.266539	0.627111	1.20398
C1_11720W_A	24.924	-0.555327	0.49297	-1.12649	0.259957	0.684187	0.921892
C5_01390C_A	6.62537	-0.555131	1.5139	-0.36669	0.71385	1	0.0455872
C3_00570C_A	94.5432	-0.554947	0.366338	-1.51485	0.129811	0.51308	0.956414
CR_10520C_A	5.56762	-0.554843	0.964431	-0.575306	0.565085	1	0.563951
C4_00690C_A	16.3838	-0.554393	0.591441	-0.937359	0.348574	1	0.0469057
C1_10800C_A	276.023	-0.554391	0.331869	-1.67051	0.0948185	0.409721	1.26776
C1_01550W_A	92.5297	-0.554162	0.300662	-1.84314	0.0653083	0.378791	1.08811
C1_04810W_A	87.2552	-0.553826	0.275747	-2.00846	0.0445944	0.349408	0.956414
C2_05140W_A	97.79	-0.553779	0.31801	-1.74139	0.0816154	0.410057	1.08811
C7_00580C_A	26.2465	-0.553526	0.47701	-1.16041	0.245883	0.649242	0.992938
C1_02050C_A	261.302	-0.553496	0.213572	-2.59161	0.00955267	0.168792	1.57692
C1_01900C_A	86.669	-0.552419	0.379114	-1.45713	0.14508	0.534811	0.959252
C4_06140C_A	20.8954	-0.551848	0.892494	-0.618321	0.536364	0.827266	1.20398
C3_07010W_A	130.224	-0.551483	0.290802	-1.89642	0.0579045	0.379091	0.956414
C4_03330W_A	48.2457	-0.551462	0.407867	-1.35206	0.176355	0.526919	1.20398
C2_09760W_A	33.7198	-0.551209	0.517821	-1.06448	0.287113	0.641293	1.20398
C4_00320C_A	42.0294	-0.550357	0.413435	-1.33118	0.183129	0.580865	0.992938
C3_03830W_A	36.8798	-0.550062	0.400725	-1.37267	0.169856	0.580865	0.921892
C5_04390C_A	0.286487	-0.549788	3.59906	-0.152759	0.878589	1	0.267755
C1_08520C_A	34.5037	-0.54929	0.527611	-1.04109	0.297834	0.705003	0.976496
C1_08980C_A	540.708	-0.549132	0.212611	-2.5828	0.00980009	0.151194	2.00674
CR_03960C_A	23.7027	-0.548129	0.663814	-0.825726	0.408959	0.801263	0.976496
C7_02530C_A	70.3297	-0.547406	0.443686	-1.23377	0.21729	0.633406	0.959252
C4_00160C_A	702.896	-0.546986	0.316117	-1.73033	0.0835714	0.330393	2.04559
C1_05850W_A	77.8766	-0.546895	0.367067	-1.4899	0.136249	0.472915	1.26776
C6_01050W_A	113.282	-0.545933	0.503193	-1.08494	0.277949	0.623707	1.26776
C4_01670C_A	32.6215	-0.545714	0.532663	-1.0245	0.305599	0.643696	1.26776
C2_03050W_A	51.923	-0.545519	0.370788	-1.47124	0.141226	0.48743	1.20398
CR_00500C_A	0.289316	-0.545497	4.04858	-0.134738	0.892819	1	0.267755
C1_10350C_A	145.332	-0.545492	0.239556	-2.2771	0.0227804	0.232962	1.49658
C1_10190W_A	61.741	-0.545235	0.429478	-1.26953	0.204253	0.616267	0.959252
C3_02310W_A	149.962	-0.543883	0.453673	-1.19884	0.230588	0.526349	1.57692
C3_03480C_A	105.039	-0.542173	0.35821	-1.51356	0.130137	0.510682	0.971458
C4_01130C_A	16.9257	-0.541941	0.633566	-0.855382	0.39234	1	0.0455872
C2_07020C_A	18.2653	-0.541778	0.843427	-0.642353	0.520644	1	0.0455872
C1_05410C_A	145.83	-0.541498	0.276009	-1.96189	0.0497754	0.270443	2.04559
C3_01310W_A	17.068	-0.541095	0.59924	-0.902968	0.366543	1	0.267755
C4_06760W_A	313.325	-0.540345	0.295432	-1.829	0.0673996	0.304182	2.04559
C3_05910W_A	22.4858	-0.53922	0.782582	-0.689026	0.490807	0.886355	0.921892
C1_11970C_A	24.0422	-0.539213	0.555342	-0.970956	0.33157	0.678872	1.20398
C4_00490W_A	15.3463	-0.539083	0.687526	-0.784091	0.432987	1	0.267755
CR_02820W_A	818.566	-0.538719	0.232149	-2.32057	0.0203099	0.198898	2.04559
CR_07420W_A	220.693	-0.538717	0.249437	-2.15973	0.0307936	0.256158	1.49658
C6_01180C_A	558.4	-0.537541	0.418854	-1.28336	0.199365	0.453361	2.04559
C1_05700W_A	89.7781	-0.536016	0.478417	-1.1204	0.262545	0.677064	0.959252
C6_02310W_A	79.7629	-0.535703	0.440758	-1.21541	0.224208	0.638494	0.959252
C2_00250W_A	1492.94	-0.53562	0.185303	-2.89051	0.00384618	0.114987	1.49658
C1_00030C_A	29.4944	-0.534919	0.49802	-1.07409	0.282782	0.639329	1.20398
C3_05710W_A	943.895	-0.534792	0.247781	-2.15832	0.0309028	0.232962	2.04559
C3_03410C_A	837.84	-0.534671	0.280487	-1.90622	0.0566214	0.285415	2.00674
C3_07050W_A	24.2587	-0.534388	0.655238	-0.815563	0.41475	0.830421	0.921892
C6_01410C_A	84.1404	-0.532312	0.474029	-1.12295	0.261457	0.676408	0.959252
C3_06420C_A	45.3331	-0.531912	0.56898	-0.934852	0.349865	0.749877	0.992938
CR_04760C_A	75.7156	-0.531707	0.453406	-1.17269	0.240918	0.649242	0.971458
C2_10350C_A	354.01	-0.531691	0.239699	-2.21816	0.0265438	0.222115	2.00674
C4_02160C_A	60.046	-0.53129	0.521262	-1.01924	0.30809	0.722278	0.956414
C2_09510C_A	59.8338	-0.530196	0.3259	-1.62687	0.103765	0.44795	1.08811
C1_04580C_A	41.1094	-0.529884	0.594125	-0.891873	0.372461	0.709379	1.20398
CR_08450C_A	76.409	-0.528569	0.328406	-1.6095	0.107507	0.480016	0.956414
CR_06430W_A	17.2952	-0.528082	0.608341	-0.868069	0.385357	1	0.0419669
C1_09120W_A	27.7718	-0.527737	0.503743	-1.04763	0.294808	0.696755	0.992938
C2_08060W_A	12.3519	-0.527706	0.776203	-0.679856	0.496596	1	0.267755
C1_13750C_A	6.73036	-0.527261	1.3634	-0.386725	0.69896	1	0.0419669
C7_02150C_A	39.3618	-0.526687	0.582444	-0.904271	0.365851	0.688598	1.26776
C5_02730C_A	52.1815	-0.52574	0.366026	-1.43634	0.150904	0.496398	1.20398
CR_04850C_A	11.8037	-0.525092	0.675264	-0.777609	0.4368	1	0.0469057
C1_08580C_A	66.4132	-0.524818	0.396374	-1.32405	0.185487	0.593796	0.956414
C1_10810W_A	0.299062	-0.524759	4.04837	-0.129622	0.896865	1	0.0469057
C6_03060W_A	0.299062	-0.524759	4.04837	-0.129622	0.896865	1	0.267755
CR_06030C_A	0.299062	-0.524759	4.04837	-0.129622	0.896865	1	0.0469057
CR_03510W_A	0.299062	-0.524759	4.04837	-0.129622	0.896865	1	0.563951
C1_06390W_A	42.3312	-0.523677	0.435615	-1.20216	0.229303	0.587561	1.20398
C1_07270W_A	148.178	-0.522001	0.287029	-1.81863	0.0689678	0.347042	1.49658
C6_00770C_A	56.6562	-0.5203	0.51975	-1.00106	0.316798	0.729368	0.959252
C1_06060C_A	80.098	-0.519835	0.378453	-1.37358	0.169573	0.569767	0.971458
C7_00830C_A	167.748	-0.519525	0.249678	-2.08078	0.037454	0.244528	2.04559
CR_09660W_A	11.78	-0.519152	0.864878	-0.600261	0.548332	1	0.267755
CR_10230W_A	175.709	-0.519066	0.228973	-2.26693	0.0233944	0.232587	1.57692
C1_01220C_A	43.0595	-0.518063	0.53465	-0.968977	0.332557	0.732557	0.992938
C3_05520C_A	195.836	-0.518052	0.234682	-2.20747	0.0272815	0.244519	1.49658
C5_04350C_A	66.0838	-0.517893	0.344267	-1.50433	0.132495	0.491487	1.08811
C1_06790C_A	57.2333	-0.517324	0.371025	-1.39431	0.163224	0.564733	0.959252
C4_04670C_A	31.8805	-0.51721	0.544821	-0.94932	0.342458	0.685109	1.20398
C5_01110W_A	55.6915	-0.516605	0.408945	-1.26326	0.206495	0.554705	1.26776
C2_07390C_A	190.297	-0.516265	0.26106	-1.97757	0.0479767	0.321306	1.26776
C2_02970C_A	2565.5	-0.516221	0.228654	-2.25765	0.0239677	0.249113	1.26776
C1_02970W_A	240.458	-0.515704	0.200371	-2.57375	0.0100604	0.153658	2.00674
C1_05800C_A	19.9638	-0.515703	0.631289	-0.816905	0.413983	1	0.0469057
C2_07950W_A	90.079	-0.514167	0.277241	-1.85458	0.063656	0.354605	1.26776
CR_09090C_A	20.6845	-0.513108	0.703376	-0.729493	0.4657	0.776991	1.20398
C3_06740W_A	30.0146	-0.512573	0.745189	-0.687843	0.491552	0.859834	0.992938
C2_09940W_A	439.214	-0.512459	0.444335	-1.15331	0.248781	0.543616	1.57692
C6_02630C_A	136.051	-0.512441	0.356625	-1.43692	0.150741	0.51666	1.08811
CR_09140C_A	1144.9	-0.511769	0.496259	-1.03125	0.302421	0.641293	1.26776
C6_03420W_A	21.4802	-0.511294	0.857673	-0.596141	0.551081	0.90966	0.976496
C5_04800W_A	6.65981	-0.51084	1.16799	-0.437367	0.661845	1	0.563951
C6_00020W_A	0.299052	-0.510741	3.54988	-0.143875	0.885599	1	0.0455872
C1_10640C_A	34.5174	-0.510562	0.551011	-0.926592	0.354139	0.695631	1.20398
C2_09300W_A	52.5856	-0.510014	0.415896	-1.2263	0.220085	0.579927	1.20398
C3_05320W_A	165.341	-0.509838	0.336843	-1.51358	0.130133	0.463353	1.26776
CR_05760C_A	33.0453	-0.509011	0.455593	-1.11725	0.263888	0.674774	0.976496
C7_00510W_A	12.7377	-0.50832	0.761636	-0.667405	0.504514	1	0.0455872
C6_02500C_A	315.803	-0.508255	0.308481	-1.64761	0.0994335	0.415192	1.26776
CR_07620W_A	173.674	-0.508056	0.214348	-2.37024	0.0177766	0.203275	1.57692
C3_07630C_A	70.3564	-0.507663	0.445108	-1.14054	0.254063	0.638146	1.08811
C1_06200W_A	67.4889	-0.507496	0.341694	-1.48523	0.137482	0.497137	1.08811
C3_07650C_A	6.68727	-0.505857	1.20443	-0.419999	0.674487	1	0.0455872
C1_00310W_A	279.029	-0.504875	0.299051	-1.68826	0.0913614	0.380302	1.49658
C1_00390W_A	1315.62	-0.50486	0.273187	-1.84804	0.0645972	0.336906	1.49658
C1_05610W_A	46.8606	-0.503631	0.461179	-1.09205	0.274811	0.681354	0.992938
CR_03480W_A	6.57547	-0.503234	1.14911	-0.437931	0.661436	1	0.563951
C1_12240C_A	89.3831	-0.503113	0.436989	-1.15132	0.249602	0.635185	1.08811
C3_06610W_A	56.8518	-0.502006	0.438106	-1.14585	0.251855	0.636493	1.08811
C6_03810W_A	33.9738	-0.50196	0.672553	-0.74635	0.455456	0.757502	1.26776
CR_06000W_A	196.687	-0.50111	0.227239	-2.20521	0.0274391	0.238464	1.57692
C3_05580C_A	162.912	-0.50063	0.401413	-1.24717	0.212335	0.560622	1.26776
C4_01840C_A	183.824	-0.500361	0.310538	-1.61127	0.107121	0.361089	2.04559
CR_00090C_A	63.0792	-0.499546	0.42977	-1.16236	0.245091	0.656651	0.959252
C2_04240C_A	83.8771	-0.499486	0.329572	-1.51556	0.12963	0.512617	0.959252
C1_11930W_A	195.726	-0.498715	0.224537	-2.22109	0.026345	0.218693	2.04559
C5_02710W_A	153.903	-0.498343	0.241137	-2.06664	0.0387684	0.270443	1.57692
C7_02170C_A	117.505	-0.498321	0.350929	-1.42001	0.155606	0.492346	1.26776
C5_04830W_A	48.9337	-0.498251	0.607741	-0.819841	0.412307	0.828522	0.921892
C4_01120C_A	17.5258	-0.497731	0.733531	-0.678541	0.497429	1	0.0419669
C2_03880C_A	33.8298	-0.497723	0.795421	-0.625735	0.531489	0.896179	0.976496
C4_03420C_A	0.361755	-0.496033	2.87979	-0.172246	0.863244	1	0.267755
C1_12470W_A	10.7806	-0.495933	0.698748	-0.709745	0.477862	1	0.267755
C1_03310W_A	161.557	-0.495097	0.25442	-1.94599	0.0516565	0.273002	2.00674
C2_02910W_A	0.304722	-0.494405	4.04808	-0.122133	0.902794	1	0.0455872
C4_06360C_A	0.304722	-0.494405	4.04808	-0.122133	0.902794	1	0.563951
C1_07180W_A	164.285	-0.494377	0.287303	-1.72075	0.0852961	0.372466	1.49658
C5_05330C_A	40.1498	-0.494375	0.424289	-1.16518	0.243945	0.667847	0.921892
C3_00320W_A	3531.9	-0.493984	0.230475	-2.14332	0.032087	0.255926	1.57692
C3_07170C_A	86.7858	-0.493269	0.358914	-1.37434	0.169337	0.542344	1.08811
C5_03610W_A	75.2725	-0.493034	0.311606	-1.58223	0.113596	0.488145	0.956414
C2_01160W_A	44.4325	-0.492755	0.561016	-0.878326	0.379767	0.775051	0.992938
C4_00480W_A	5.81066	-0.492514	1.1411	-0.431614	0.666022	1	0.563951
CR_00980C_A	233.816	-0.492505	0.263077	-1.87209	0.0611935	0.353048	1.26776
C4_02430W_A	120.287	-0.492417	0.292449	-1.68377	0.0922254	0.406508	1.26776
C6_03270C_A	108.165	-0.492159	0.388907	-1.26549	0.205695	0.587263	1.08811
C4_06180C_A	0.387151	-0.490993	4.04805	-0.121291	0.90346	1	0.0469057
C4_00120W_A	89.2442	-0.490791	0.748615	-0.655599	0.512082	0.843637	1.08811
C2_06870C_A	312.687	-0.490062	0.450062	-1.08888	0.276208	0.622635	1.26776
C7_03760W_A	5.7237	-0.489679	1.29795	-0.377272	0.705972	1	0.0469057
C1_03510C_A	733.815	-0.489626	0.271178	-1.80555	0.0709884	0.37175	1.26776
C6_01030W_A	46.776	-0.489373	0.481149	-1.01709	0.309109	0.657929	1.20398
C6_02870W_A	75.3283	-0.48922	0.391741	-1.24884	0.211725	0.560108	1.26776
C7_03010W_A	201.076	-0.488314	0.340055	-1.43598	0.151007	0.407557	2.04559
CR_00040C_A	41.2485	-0.487271	0.446616	-1.09103	0.27526	0.6816	0.992938
C1_00370W_A	16.5762	-0.48465	0.643859	-0.752727	0.451614	1	0.563951
C1_14140C_A	200.218	-0.484593	0.359609	-1.34755	0.177802	0.434505	2.00674
C2_09980W_A	281.328	-0.484372	0.316517	-1.53032	0.125937	0.424908	1.49658
C7_03020C_A	134.399	-0.484216	0.279455	-1.73272	0.0831463	0.410891	1.08811
C2_09500W_A	28.5656	-0.484199	0.680108	-0.711945	0.476499	0.84898	0.992938
C1_10440W_A	87.7188	-0.484091	0.377369	-1.28281	0.19956	0.60833	0.971458
CR_00360C_A	381.532	-0.48319	0.292886	-1.64975	0.0989932	0.414508	1.26776
CR_10430C_A	7.24216	-0.483161	1.06212	-0.454901	0.64918	1	0.267755
C5_01420W_A	94.8487	-0.483112	0.423001	-1.1421	0.253411	0.662955	0.971458
C1_06650W_A	77.6759	-0.482679	0.325092	-1.48475	0.137611	0.497275	1.08811
C1_06560W_A	45.856	-0.482127	0.419263	-1.14994	0.250169	0.65315	0.992938
C1_00580W_A	43.8196	-0.482038	0.643607	-0.748962	0.45388	0.842044	0.976496
C4_07160W_A	5.55509	-0.481627	1.15863	-0.415686	0.67764	1	0.0469057
C3_07850W_A	70.3449	-0.481354	1.49155	-0.322721	0.746906	0.994752	1.08811
C1_01340C_A	26.7783	-0.481028	0.534274	-0.90034	0.367939	0.767381	0.976496
C3_00680C_A	27.4654	-0.480746	0.887701	-0.541563	0.58812	0.853342	1.20398
C1_13280C_A	113.581	-0.480716	0.24187	-1.98749	0.0468677	0.353048	0.959252
C2_06720W_A	67.9513	-0.479213	0.435166	-1.10122	0.270801	0.684187	0.956414
C2_10300C_A	6.36593	-0.478903	1.08191	-0.442644	0.658023	1	0.0469057
C4_04300C_A	15.478	-0.477611	0.859595	-0.555623	0.578468	1	0.563951
C4_04350W_A	57.4543	-0.476194	1.47462	-0.322927	0.746751	1	0.956414
C4_05440C_A	100.14	-0.475105	0.285909	-1.66173	0.0965661	0.456451	0.971458
C1_10290W_A	96.084	-0.474964	0.652124	-0.728333	0.46641	0.761266	1.26776
C4_00700C_A	59.8242	-0.474226	0.449316	-1.05544	0.291225	0.670491	1.08811
CR_03810W_A	242.027	-0.473732	0.424054	-1.11715	0.26393	0.610731	1.26776
CR_05610C_A	15.2633	-0.473374	0.969332	-0.488351	0.625301	1	0.0455872
C1_10860C_A	30.6405	-0.473229	0.43685	-1.08327	0.278687	0.683972	0.992938
C3_02340W_A	16.602	-0.472948	1.01809	-0.464547	0.642256	1	0.0469057
C2_00180C_A	68.8118	-0.472451	0.569867	-0.829055	0.407073	0.807132	0.956414
C1_01670C_A	60.921	-0.472327	0.509829	-0.926441	0.354217	0.682864	1.26776
C3_02860W_A	41.4348	-0.471415	0.467791	-1.00775	0.313576	0.717234	0.992938
C2_03040W_A	55.1549	-0.471147	0.361059	-1.3049	0.191926	0.534883	1.26776
C2_01230W_A	12.2236	-0.470904	0.718127	-0.655738	0.511993	1	0.0469057
C6_02810C_A	114.703	-0.470348	0.321039	-1.46508	0.142898	0.531225	0.959252
C1_07400C_A	27.1826	-0.469969	0.465016	-1.01065	0.312183	0.720462	0.976496
C3_06990W_A	24.8918	-0.469589	0.564929	-0.831236	0.40584	0.794639	0.992938
C1_11600W_A	44.5543	-0.469573	0.422083	-1.11251	0.265917	0.688545	0.921892
C1_08030W_A	272.671	-0.469192	0.228361	-2.0546	0.0399173	0.270521	1.57692
C1_02130C_A	166.802	-0.46899	0.395235	-1.18661	0.23538	0.581818	1.26776
C1_08390C_A	96.3138	-0.468936	0.254232	-1.84452	0.065108	0.394269	0.959252
C3_05250C_A	29.2251	-0.468539	0.701686	-0.667733	0.504304	0.898527	0.921892
C1_08020W_A	99.2904	-0.467971	0.250536	-1.86788	0.0617788	0.391174	0.956414
C7_00120W_A	35.9192	-0.467969	0.887344	-0.527382	0.597928	0.941441	0.976496
C3_03180C_A	89.4064	-0.467745	0.397851	-1.17568	0.239724	0.651222	0.956414
CR_03470W_A	156.948	-0.467511	0.282129	-1.65708	0.0975025	0.35237	2.04559
CR_09570W_A	25.2691	-0.467307	0.563802	-0.828849	0.40719	0.734723	1.20398
CR_06520C_A	23.5379	-0.466619	0.725389	-0.643267	0.520051	0.796015	1.26776
C1_13650C_A	95.053	-0.466237	0.481219	-0.968866	0.332612	0.74343	0.959252
C5_02080C_A	1395.97	-0.466056	0.334949	-1.39143	0.164096	0.418801	2.04559
C4_02700W_A	23.778	-0.465993	0.768371	-0.606469	0.544204	0.831566	1.20398
C6_00550W_A	87.0589	-0.465966	0.369217	-1.26204	0.206935	0.587286	1.08811
C7_02490W_A	133.819	-0.465013	0.269908	-1.72286	0.084914	0.392217	1.26776
C4_00380W_A	68.4914	-0.464976	0.328503	-1.41544	0.15694	0.524056	1.08811
C6_03100W_A	124.663	-0.464634	0.304988	-1.52345	0.127646	0.48743	1.08811
C5_01560C_A	38.5258	-0.464278	0.468577	-0.990825	0.321771	0.746076	0.921892
C2_00770W_A	117.894	-0.464094	0.351199	-1.32146	0.186349	0.59481	0.956414
C2_01900C_A	64.4658	-0.463835	0.391677	-1.18423	0.236323	0.649242	0.956414
CR_00810W_A	8.5326	-0.46374	0.84	-0.552071	0.5809	1	0.0469057
C2_02490C_A	187.98	-0.463572	0.21841	-2.12249	0.033797	0.26673	1.49658
C1_03490W_A	143.72	-0.463539	0.295509	-1.56861	0.116738	0.375647	2.00674
CR_07860C_A	32.2992	-0.463281	0.44688	-1.0367	0.299874	0.701251	0.992938
CR_09710W_A	50.3247	-0.463218	0.477839	-0.969401	0.332345	0.757949	0.921892
C3_00360W_A	35.6681	-0.462653	0.431435	-1.07236	0.283559	0.690747	0.976496
C6_00510C_A	110.676	-0.462249	0.380125	-1.21605	0.223967	0.635611	0.971458
C2_10170C_A	96.3735	-0.462193	0.443696	-1.04169	0.297555	0.709778	0.959252
C1_01930W_A	314.107	-0.46217	0.23543	-1.96309	0.0496362	0.270443	2.00674
C6_00780W_A	182.946	-0.461788	0.317295	-1.45539	0.145561	0.405699	2.00674
C5_05190W_A	41.1292	-0.461245	0.529035	-0.871862	0.383284	0.781703	0.976496
C1_13990W_A	15.0747	-0.461211	0.902383	-0.511103	0.609279	1	0.0469057
C6_02730W_A	903.302	-0.460409	0.327324	-1.40659	0.15955	0.496772	1.26776
C3_02090C_A	63.813	-0.459273	0.367659	-1.24918	0.211599	0.560108	1.26776
C1_10530W_A	108.885	-0.459201	0.365347	-1.25689	0.208793	0.622328	0.959252
C5_00510W_A	0.317277	-0.457991	4.04773	-0.113147	0.909914	1	0.0455872
C5_05070W_A	39.5061	-0.4578	0.490791	-0.932779	0.350934	0.757502	0.976496
C1_13270W_A	126.519	-0.457428	0.416535	-1.09817	0.272129	0.684187	0.959252
C3_02830W_A	91.7447	-0.457389	0.318148	-1.43766	0.15053	0.51666	1.08811
C1_01600W_A	86.1511	-0.457276	0.373357	-1.22477	0.220663	0.633406	0.971458
C5_04670W_A	200.848	-0.457004	0.239256	-1.9101	0.0561199	0.313266	1.57692
C5_02520W_A	35.6748	-0.456994	0.43649	-1.04697	0.295112	0.720642	0.921892
C3_05830W_A	129.094	-0.456937	0.273319	-1.67181	0.0945618	0.430326	1.08811
C6_00600C_A	102.113	-0.456745	0.361429	-1.26372	0.20633	0.615514	0.971458
C3_00890C_A	58.8705	-0.456693	0.376127	-1.2142	0.224672	0.609737	1.08811
C5_03840W_A	23.6101	-0.456664	0.50787	-0.899176	0.368559	0.768398	0.976496
C6_00190W_A	113.241	-0.456635	0.395775	-1.15377	0.248593	0.596043	1.26776
C7_01410C_A	36.2353	-0.456445	0.454896	-1.00341	0.315665	0.723383	0.976496
C1_07090C_A	124.373	-0.455895	0.295207	-1.54432	0.12251	0.496818	0.971458
CR_02130W_A	513.752	-0.455837	0.276322	-1.64966	0.0990125	0.414508	1.26776
C1_00420W_A	311.122	-0.455353	0.294645	-1.54543	0.122242	0.414283	1.57692
C2_09890W_A	6.94468	-0.455212	1.45704	-0.312422	0.75472	1	0.267755
C3_00140W_A	0.357087	-0.454881	3.47168	-0.131026	0.895755	1	0.0469057
C6_03350C_A	113.074	-0.454859	0.321405	-1.41522	0.157004	0.493843	1.26776
C6_04440C_A	64.5344	-0.454662	0.383801	-1.18463	0.236164	0.620841	1.08811
CR_02460W_A	132.117	-0.45465	0.469816	-0.96772	0.333184	0.706717	1.08811
C1_08670W_A	76.9611	-0.45451	0.353747	-1.28484	0.198847	0.609745	0.959252
C6_02900C_A	13.7492	-0.454376	1.32136	-0.343871	0.730943	1	0.0455872
C1_11010C_A	64.3998	-0.453215	0.339379	-1.33542	0.181738	0.587286	0.956414
C1_09570W_A	52.5942	-0.45247	0.43488	-1.04045	0.298132	0.723383	0.921892
C5_01810W_A	67.5481	-0.452219	0.358703	-1.2607	0.207416	0.618799	0.959252
C2_03680W_A	22.1268	-0.451749	0.61053	-0.73993	0.459342	0.843637	0.976496
C6_02640C_A	82.2074	-0.451596	0.463576	-0.974157	0.329979	0.736019	0.971458
C5_01640W_A	56.5537	-0.451223	0.421163	-1.07137	0.284002	0.693529	0.971458
C3_00760W_A	245.85	-0.451017	0.273669	-1.64804	0.0993442	0.392217	1.49658
C4_07220C_A	88.3287	-0.449733	0.334423	-1.34481	0.178688	0.582595	0.959252
C3_06490W_A	130.851	-0.449289	0.351332	-1.27882	0.200962	0.611875	0.959252
C1_03730C_A	207.296	-0.448991	0.236075	-1.9019	0.0571837	0.28683	2.00674
C5_03830C_A	49.3623	-0.448741	0.408494	-1.09853	0.271975	0.682864	0.976496
C3_02770C_A	60.1986	-0.448641	0.374415	-1.19825	0.230822	0.641293	0.971458
C1_07670W_A	0.327632	-0.447781	4.04764	-0.110628	0.911912	1	0.563951
CR_10790W_A	20.3157	-0.446609	0.695044	-0.642562	0.520509	0.881836	0.992938
CR_03750C_A	17.5588	-0.446545	0.704237	-0.634083	0.526027	1	0.0419669
C6_04430W_A	15.1099	-0.446035	0.601667	-0.741332	0.458492	1	0.0455872
C3_04930C_A	66.2817	-0.445693	0.358478	-1.24329	0.21376	0.62805	0.959252
CR_05220C_A	23.0517	-0.44521	0.523573	-0.850331	0.395141	0.785144	0.992938
C5_02110W_A	1398.71	-0.44459	0.346273	-1.28393	0.199167	0.45641	2.00674
C2_03090C_A	47.6014	-0.442703	0.488706	-0.905868	0.365006	0.702345	1.20398
C5_03700C_A	45.0887	-0.442649	0.423393	-1.04548	0.295801	0.64902	1.20398
C5_04960W_A	185.14	-0.442601	0.209231	-2.11537	0.0343985	0.238464	2.04559
C6_02040W_A	738.409	-0.441983	0.289232	-1.52813	0.126481	0.386748	2.00674
C1_07510W_A	43.4584	-0.441971	0.395304	-1.11805	0.263544	0.610453	1.26776
C2_08130W_A	330.977	-0.441515	0.373548	-1.18195	0.237226	0.48658	2.04559
CR_08990C_A	696.966	-0.440984	0.211966	-2.08045	0.0374845	0.268846	1.57692
C4_04230W_A	46.4647	-0.440082	0.425778	-1.03359	0.301326	0.641293	1.26776
C5_00920W_A	23.2371	-0.44003	0.558982	-0.787199	0.431165	0.842855	0.921892
C2_09610W_A	15.4878	-0.439799	0.614763	-0.715396	0.474364	1	0.267755
C2_07130C_A	298.456	-0.438589	0.222957	-1.96714	0.0491665	0.323011	1.26776
C4_04510W_A	153.001	-0.43787	0.374793	-1.1683	0.242687	0.539946	1.57692
C1_09000W_A	84.1584	-0.437564	0.369822	-1.18317	0.23674	0.649242	0.956414
C1_09900W_A	0.320736	-0.437459	3.46918	-0.126099	0.899654	1	0.267755
C2_10240W_A	125.979	-0.437342	0.332721	-1.31444	0.188697	0.597451	0.956414
CR_08130W_A	55.195	-0.436992	0.503276	-0.868294	0.385234	0.720571	1.20398
C3_00690C_A	31.3814	-0.436718	0.486182	-0.898261	0.369046	0.762683	0.992938
C3_07180C_A	87.1336	-0.436389	0.543679	-0.802659	0.422172	0.823699	0.956414
C4_03580W_A	13.4755	-0.436286	0.896215	-0.48681	0.626393	1	0.267755
C3_00840C_A	16.4185	-0.436245	0.66735	-0.653698	0.513306	1	0.267755
CR_06320C_A	29.2817	-0.436155	0.521521	-0.836313	0.402979	0.718981	1.26776
CR_03310C_A	145.078	-0.435613	0.312362	-1.39458	0.163143	0.421097	2.00674
C1_12660W_A	35.1831	-0.435073	0.520579	-0.835749	0.403296	0.732557	1.20398
CR_00920W_A	12.9397	-0.434993	0.681194	-0.638574	0.5231	1	0.563951
C2_06460W_A	126.452	-0.434981	0.325133	-1.33785	0.180944	0.586957	0.959252
C2_10340W_A	30.2655	-0.434936	0.600757	-0.72398	0.469078	0.778804	1.20398
CR_05340C_A	1656.56	-0.434401	0.289665	-1.49967	0.133701	0.392217	2.04559
CR_08860W_A	132.583	-0.433602	0.31781	-1.36434	0.17246	0.575629	0.956414
C2_02980C_A	219.354	-0.433518	0.269279	-1.60992	0.107415	0.404014	1.49658
C3_00930W_A	135.969	-0.433099	0.247436	-1.75035	0.080058	0.424214	0.959252
C2_08960C_A	13.4282	-0.43103	0.922139	-0.467424	0.640197	1	0.0455872
CR_03800C_A	35.5792	-0.430699	0.830438	-0.518641	0.604011	0.864816	1.20398
CR_10270C_A	143.18	-0.429591	0.242675	-1.77023	0.0766883	0.379091	1.26776
C1_02850W_A	93.2036	-0.428586	0.279863	-1.53141	0.125667	0.4564	1.26776
C1_00190C_A	0.326405	-0.42818	4.04746	-0.10579	0.915749	1	0.563951
C7_01660C_A	67.603	-0.427923	0.418825	-1.02172	0.306913	0.684187	1.08811
C2_06910W_A	67.7222	-0.427908	0.337149	-1.2692	0.204371	0.617673	0.956414
C2_01250W_A	71.0343	-0.42784	0.407242	-1.05058	0.293451	0.673674	1.08811
C2_10600W_A	44.405	-0.427448	0.509827	-0.838418	0.401796	0.816282	0.921892
C3_01900C_A	49.0441	-0.427386	0.572976	-0.745906	0.455724	0.757502	1.26776
C2_01720C_A	42.1473	-0.427234	0.395793	-1.07944	0.280393	0.684187	0.992938
C1_12340C_A	88.4277	-0.426427	0.318729	-1.3379	0.18093	0.522612	1.26776
C7_00950W_A	55.5097	-0.425713	0.457971	-0.929562	0.352598	0.723383	1.08811
C4_03380C_A	27.7237	-0.425315	0.566919	-0.750222	0.453121	0.834792	0.992938
C1_12950W_A	33.4597	-0.424203	0.541218	-0.783793	0.433162	0.843637	0.921892
CR_07250C_A	13.7807	-0.423876	0.980531	-0.432292	0.665529	1	0.563951
C4_04310W_A	66.2027	-0.423779	0.31682	-1.3376	0.181027	0.587286	0.956414
C1_11270W_A	421.325	-0.423611	0.242739	-1.74513	0.0809621	0.388782	1.26776
C1_02440C_A	34.2999	-0.423357	0.477954	-0.88577	0.375741	0.776033	0.976496
C7_00810W_A	56.7225	-0.423063	0.503544	-0.840172	0.400812	0.717532	1.26776
C2_03250W_A	93.2239	-0.42302	0.31922	-1.32517	0.185115	0.564733	1.08811
C5_02760W_A	50.2912	-0.423013	0.412226	-1.02617	0.304812	0.707107	0.992938
C5_03740W_A	54.7661	-0.422117	0.486626	-0.867435	0.385704	0.782793	0.976496
C7_02810W_A	809.612	-0.421801	0.184323	-2.28838	0.0221154	0.200736	2.04559
C5_00800C_A	271.864	-0.421072	0.202092	-2.08357	0.0371996	0.270521	1.49658
C6_02060W_A	315.837	-0.420952	0.303702	-1.38607	0.165725	0.504276	1.26776
C4_01230C_A	28.8195	-0.420676	0.545012	-0.771866	0.440194	0.846936	0.921892
C2_04760W_A	133.194	-0.419225	0.28352	-1.47864	0.139237	0.524642	0.956414
C3_05270C_A	102.142	-0.418886	0.350638	-1.19464	0.232228	0.580002	1.26776
C2_10590W_A	184.638	-0.418327	0.328995	-1.27153	0.203541	0.456451	2.04559
C5_00170W_A	62.4849	-0.418214	0.352022	-1.18803	0.23482	0.648295	0.959252
CR_09500C_A	51.1887	-0.417819	0.563367	-0.741645	0.458302	0.86061	0.921892
C6_01590W_A	143.93	-0.417373	0.282718	-1.47629	0.139867	0.443927	1.49658
C2_04780W_A	159.745	-0.417155	0.259799	-1.60568	0.108344	0.363575	2.04559
C3_06400C_A	45.0616	-0.417066	0.423055	-0.985845	0.324209	0.725721	0.992938
C2_06160W_A	5.00212	-0.416803	1.25786	-0.331359	0.740374	1	0.0469057
C1_13570W_A	37.3156	-0.416606	0.493291	-0.844543	0.398366	0.715272	1.26776
C6_03890C_A	109.95	-0.416589	0.360255	-1.15637	0.247529	0.595463	1.26776
C4_02620C_A	949.174	-0.416507	0.307041	-1.35652	0.174935	0.430326	2.00674
CR_00130C_A	94.4463	-0.4164	0.448911	-0.927579	0.353626	0.761927	0.956414
C1_01830C_A	174.15	-0.416326	0.298532	-1.39458	0.163143	0.421097	2.00674
C4_01080W_A	124.688	-0.415612	0.432737	-0.960427	0.33684	0.749877	0.956414
C3_02080W_A	48.5207	-0.415148	0.453816	-0.914792	0.360301	0.761373	0.976496
CR_02970C_A	169.355	-0.41434	0.226403	-1.8301	0.0672347	0.30654	2.00674
C4_06490C_A	12.7356	-0.413212	0.73135	-0.564999	0.572074	1	0.0419669
C2_00390C_A	132.779	-0.412736	0.347412	-1.18803	0.234821	0.648295	0.959252
C7_03610C_A	80.814	-0.412554	0.329284	-1.25288	0.210249	0.623707	0.959252
C7_00600C_A	48.4356	-0.41212	0.448555	-0.918772	0.358215	0.697449	1.20398
C3_01090W_A	21.6704	-0.411686	0.629412	-0.654079	0.513061	0.875223	0.992938
C2_04940C_A	87.0899	-0.411557	0.402024	-1.02371	0.305971	0.716474	0.971458
C1_03180W_A	16.0642	-0.410918	0.917665	-0.447786	0.654307	1	0.563951
CR_00050W_A	7.14099	-0.410767	1.14631	-0.35834	0.720089	1	0.563951
C4_06540W_A	606.821	-0.410608	0.217663	-1.88644	0.0592357	0.287915	2.04559
C1_02920W_A	139.973	-0.410335	0.290115	-1.41439	0.157248	0.524056	1.08811
C1_05170C_A	243.305	-0.410194	0.345095	-1.18864	0.234581	0.48743	2.00674
C5_03260C_A	55.6223	-0.409886	0.459905	-0.89124	0.372801	0.73879	1.08811
C7_01740C_A	62.2852	-0.409324	0.370962	-1.10341	0.269848	0.684187	0.956414
C2_08930W_A	234.835	-0.409024	0.276263	-1.48056	0.138724	0.394269	2.04559
CR_01650W_A	80.6229	-0.408856	0.421732	-0.969467	0.332312	0.743943	0.956414
C3_07560W_A	212.918	-0.408641	0.227716	-1.79452	0.0727306	0.353048	1.49658
C7_03780C_A	39.5621	-0.407942	0.613136	-0.665337	0.505835	0.785862	1.26776
CR_03710C_A	172.17	-0.40794	0.386277	-1.05608	0.290931	0.580865	1.57692
CR_06830C_A	19.159	-0.407701	0.844513	-0.482765	0.629263	1	0.0419669
C2_07370W_A	44.1173	-0.407577	0.52632	-0.77439	0.4387	0.759733	1.20398
C1_13560W_A	14.5899	-0.407451	0.753796	-0.540532	0.58883	1	0.0455872
C3_05190C_A	168.173	-0.407419	0.306331	-1.33	0.183519	0.437163	2.04559
C7_00180W_A	35.4681	-0.407395	0.435151	-0.936215	0.349162	0.770564	0.921892
CR_10740W_A	32.7032	-0.407264	0.476264	-0.855122	0.392484	0.709379	1.26776
C2_03170W_A	19.8269	-0.407121	0.70636	-0.576365	0.564368	1	0.0469057
C3_03910W_A	593.408	-0.407101	0.236428	-1.72188	0.0850915	0.366965	1.57692
C2_08740W_A	37.6064	-0.406554	0.838038	-0.485127	0.627586	0.879468	1.20398
CR_01370C_A	60.6419	-0.406328	0.465801	-0.872322	0.383033	0.701282	1.26776
C1_02150W_A	163.278	-0.405758	0.31069	-1.30599	0.191556	0.491311	1.57692
C3_02220W_A	125.242	-0.405588	0.283008	-1.43314	0.151819	0.488744	1.26776
C3_06680C_A	22.1536	-0.405527	0.717656	-0.565071	0.572025	0.846005	1.20398
C1_13760W_A	96.1397	-0.404112	0.332808	-1.21425	0.224653	0.638665	0.959252
C1_14250C_A	191.367	-0.403618	0.278859	-1.44739	0.147788	0.444315	1.57692
C1_13110C_A	215.833	-0.402501	0.306459	-1.31339	0.189051	0.445941	2.00674
C7_03770C_A	41.6924	-0.402494	0.422124	-0.953498	0.340338	0.684187	1.20398
C6_00590W_A	134.268	-0.402398	0.406366	-0.990234	0.32206	0.733079	0.959252
CR_08470W_A	25.7348	-0.401741	0.518252	-0.775184	0.438231	0.759255	1.20398
CR_08550W_A	99.7887	-0.400618	0.303829	-1.31856	0.187315	0.596043	0.956414
C3_05220W_A	308.28	-0.400568	0.431913	-0.927428	0.353704	0.640484	1.49658
C4_00960W_A	38.1208	-0.400245	0.580709	-0.689236	0.490675	0.865478	0.976496
C3_07350W_A	101.724	-0.399894	0.371539	-1.07632	0.281785	0.62793	1.26776
C1_00960C_A	77.1928	-0.39948	0.328955	-1.21439	0.224598	0.638665	0.959252
C1_09160W_A	49.8893	-0.398961	0.557771	-0.715276	0.474438	0.851189	0.976496
C1_02510W_A	30.7363	-0.397945	0.511245	-0.778384	0.436343	0.828414	0.976496
C1_08990C_A	176.714	-0.397512	0.224409	-1.77138	0.0764983	0.37899	1.26776
C1_03600W_A	155.785	-0.397435	0.373338	-1.06454	0.287082	0.523241	2.00674
C2_07890W_A	84.8603	-0.397159	0.321755	-1.23435	0.217072	0.633406	0.956414
C6_03850C_A	45.9323	-0.397093	0.47404	-0.837678	0.402212	0.797506	0.976496
C1_14190C_A	46.5546	-0.396697	0.487614	-0.813547	0.415905	0.741959	1.20398
C3_05720C_A	47.3839	-0.396383	0.453375	-0.874294	0.381958	0.776033	0.992938
C2_05860C_A	16.0165	-0.395464	0.781225	-0.506211	0.612709	1	0.0469057
C4_05610C_A	562.486	-0.395329	0.221447	-1.7852	0.0742283	0.318463	2.00674
CR_02990C_A	119.645	-0.395324	0.315766	-1.25195	0.210587	0.623707	0.959252
C1_11790W_A	29.4329	-0.395203	0.493778	-0.800366	0.423499	0.807696	0.992938
C5_02510C_A	69.1149	-0.395018	0.376468	-1.04927	0.294052	0.706767	0.959252
C3_01890C_A	254.779	-0.394461	0.248937	-1.58458	0.113062	0.371887	2.00674
C1_02340C_A	0.33896	-0.39383	4.04715	-0.0973107	0.92248	1	0.0469057
C6_03020W_A	89.0605	-0.393747	0.451598	-0.871897	0.383264	0.786733	0.956414
C1_00570C_A	65.0238	-0.39311	0.407822	-0.963927	0.335083	0.667847	1.26776
CR_07520C_A	110.587	-0.392511	0.26174	-1.49962	0.133713	0.492346	1.08811
C6_03730C_A	75.0883	-0.392402	0.397154	-0.988034	0.323136	0.696755	1.08811
C3_04120C_A	31.5886	-0.392181	0.491698	-0.797604	0.4251	0.808847	0.992938
C4_01980C_A	245.95	-0.392176	0.328703	-1.1931	0.23283	0.542344	1.49658
C3_03920W_A	46.1739	-0.392158	0.474548	-0.826382	0.408587	0.797236	0.992938
C1_08630W_A	35.8583	-0.391689	0.521913	-0.750487	0.452961	0.841766	0.976496
CR_05890C_A	71.5627	-0.391583	0.364418	-1.07454	0.28258	0.691127	0.971458
C1_11190W_A	62.7211	-0.391476	0.338081	-1.15794	0.24689	0.633406	1.08811
C1_02320C_A	111.782	-0.391467	0.360651	-1.08545	0.277725	0.686854	0.971458
C1_03260W_A	31.4381	-0.391213	0.566652	-0.690394	0.489947	0.886004	0.921892
C2_02180W_A	77.0596	-0.391197	0.355731	-1.0997	0.271464	0.682864	0.971458
C2_06030W_A	76.592	-0.390237	0.328274	-1.18875	0.234537	0.643696	0.971458
C4_05810W_A	285.139	-0.389875	0.186651	-2.08879	0.036727	0.268846	1.57692
C1_06780W_A	266.311	-0.389731	0.273261	-1.42622	0.153804	0.410057	2.04559
C1_14500C_A	283.171	-0.389463	0.200896	-1.93863	0.0525468	0.272906	2.04559
C1_12260W_A	31.2841	-0.389375	0.686945	-0.566821	0.570836	0.925462	0.976496
C5_01570C_A	0.342389	-0.388391	4.0471	-0.0959679	0.923546	1	0.563951
C2_08430C_A	0.372472	-0.388023	3.40652	-0.113906	0.909312	1	0.563951
C1_13220C_A	188.882	-0.387564	0.261283	-1.48331	0.137992	0.430514	1.57692
CR_09780C_A	11.1899	-0.387441	1.30604	-0.296654	0.766731	1	0.0455872
CR_06910W_A	104.173	-0.386955	0.321108	-1.20506	0.228179	0.641293	0.956414
C3_04250W_A	19.5273	-0.386451	0.621199	-0.622105	0.533873	1	0.0419669
C1_03290W_A	98.1984	-0.385968	0.26784	-1.44104	0.149574	0.539946	0.971458
C4_05760W_A	47.4188	-0.385429	0.376252	-1.02439	0.305651	0.643696	1.26776
CR_04770C_A	39.7471	-0.385243	0.449174	-0.857671	0.391074	0.786733	0.976496
CR_09920W_A	220.392	-0.385108	0.383033	-1.00542	0.314696	0.542398	2.00674
C6_02050W_A	31.8766	-0.385059	0.780467	-0.49337	0.621751	0.986683	0.921892
C5_00520W_A	0.339579	-0.38433	3.43114	-0.112012	0.910814	1	0.0419669
C4_03310C_A	0.339579	-0.38433	3.43114	-0.112012	0.910814	1	0.563951
C7_01260W_A	0.339579	-0.38433	3.43114	-0.112012	0.910814	1	0.0455872
CR_02590C_A	39.3233	-0.384168	0.486837	-0.78911	0.430048	0.75613	1.20398
C4_04000W_A	36.7163	-0.383571	0.430932	-0.890096	0.373414	0.791149	0.921892
C5_02410C_A	5.73121	-0.383323	1.12001	-0.34225	0.732163	1	0.0419669
C1_01810C_A	145.284	-0.383281	0.406631	-0.942577	0.345897	0.623707	1.57692
C1_03670C_A	108.587	-0.382266	0.410866	-0.93039	0.352169	0.761266	0.956414
C6_03080C_A	113.077	-0.382205	0.255094	-1.49829	0.134058	0.518574	0.959252
C2_05370C_A	78.0423	-0.382079	0.346285	-1.10336	0.269869	0.649242	1.08811
CR_04580W_A	89.015	-0.381703	0.372749	-1.02402	0.305825	0.684187	1.08811
C4_00200C_A	365.052	-0.381438	0.179036	-2.13051	0.0331297	0.263859	1.49658
C2_04290W_A	260.329	-0.381138	0.206276	-1.84771	0.0646443	0.356913	1.26776
CR_08690C_A	37.967	-0.380556	0.547538	-0.695032	0.487035	0.883354	0.921892
C1_04200C_A	95.9407	-0.380248	0.278075	-1.36743	0.17149	0.571761	0.971458
C3_04260W_A	47.894	-0.380029	0.429268	-0.885297	0.375997	0.696755	1.26776
C2_02380W_A	340.095	-0.379968	0.246098	-1.54397	0.122596	0.422687	1.49658
C1_06850W_A	347.438	-0.37994	0.261482	-1.45302	0.146217	0.453716	1.49658
C1_11940C_A	14.5678	-0.379799	0.787081	-0.482542	0.629421	1	0.563951
C4_06400C_A	150.637	-0.379675	0.288618	-1.31549	0.188345	0.530098	1.26776
CR_09860W_A	123.335	-0.379104	0.299298	-1.26664	0.205283	0.614633	0.971458
C6_02940C_A	271.965	-0.378573	0.279195	-1.35595	0.175117	0.430326	2.00674
C2_04990W_A	14.1659	-0.378123	0.938513	-0.402895	0.687025	1	0.563951
C1_12130C_A	40.4719	-0.377776	0.631261	-0.598447	0.549542	0.908553	0.976496
CR_03140C_A	27.8608	-0.377461	0.612463	-0.616299	0.537697	0.924579	0.921892
C6_03310W_A	80.3554	-0.376812	0.462239	-0.815189	0.414964	0.813669	0.959252
C3_02190C_A	67.288	-0.376742	0.369681	-1.0191	0.308156	0.722278	0.956414
C4_02920W_A	135.464	-0.375527	0.285909	-1.31345	0.189032	0.568534	1.08811
C1_11810W_A	95.9423	-0.375389	0.314242	-1.19459	0.232248	0.580002	1.26776
C4_02690W_A	110.436	-0.374815	0.259481	-1.44448	0.148603	0.537672	0.971458
C2_03370W_A	17.5909	-0.374653	0.755584	-0.495845	0.620004	1	0.0455872
C2_10440C_A	149.432	-0.373485	0.270002	-1.38327	0.166583	0.423657	2.00674
C2_06420C_A	429.404	-0.372891	0.221569	-1.68296	0.0923838	0.342909	2.04559
CR_02720C_A	42.7942	-0.372672	0.537362	-0.69352	0.487983	0.791206	1.20398
C3_04520C_A	223.643	-0.372087	0.191636	-1.94164	0.0521811	0.274105	2.00674
C3_03500W_A	89.9171	-0.372076	0.28193	-1.31975	0.186919	0.528546	1.26776
C5_04870W_A	80.0256	-0.371978	0.432392	-0.860281	0.389634	0.791706	0.959252
CR_00890C_A	28.1509	-0.371799	0.512015	-0.726149	0.467748	0.843804	0.992938
C3_02910W_A	6.2698	-0.371601	1.10177	-0.337277	0.735908	1	0.563951
C1_00140W_A	200.687	-0.371348	0.212889	-1.74433	0.0811017	0.388782	1.26776
CR_10040W_A	66.3733	-0.371093	0.361452	-1.02667	0.304575	0.718705	0.959252
C1_01270W_A	98.6553	-0.369636	0.299243	-1.23524	0.216742	0.598862	1.08811
C1_10610W_A	49.1415	-0.369496	0.506931	-0.72889	0.466069	0.86648	0.921892
C1_06730W_A	57.8823	-0.369423	0.340615	-1.08458	0.278109	0.656651	1.08811
C3_05950W_A	16.0256	-0.369365	0.744821	-0.495911	0.619958	1	0.0419669
C1_02450C_A	14.4875	-0.368946	1.15569	-0.319244	0.749542	1	0.0419669
C1_04560W_A	59.7121	-0.36871	0.494714	-0.7453	0.456091	0.846828	0.956414
CR_02920C_A	746.592	-0.368272	0.301548	-1.22127	0.221984	0.529864	1.49658
C4_06460C_A	31.339	-0.368269	0.537315	-0.685387	0.4931	0.860299	0.992938
C1_07840W_A	194.384	-0.367972	0.262399	-1.40234	0.160814	0.472915	1.49658
CR_00110W_A	96.7311	-0.36724	0.438483	-0.837525	0.402297	0.801384	0.959252
C6_00790C_A	179.701	-0.367212	0.286376	-1.28227	0.199747	0.543524	1.26776
C1_13610C_A	122.092	-0.367197	0.507648	-0.72333	0.469477	0.850755	0.971458
C1_03940W_A	143.172	-0.366803	0.261171	-1.40445	0.160184	0.497137	1.26776
C1_05150C_A	0.37875	-0.366689	3.42654	-0.107015	0.914777	1	0.563951
CR_03880W_A	0.342409	-0.366611	3.39349	-0.108034	0.913969	1	0.563951
C3_05970C_A	130.13	-0.3666	0.313538	-1.16924	0.242308	0.62798	1.08811
C4_00790C_A	12.5148	-0.366531	0.709045	-0.516936	0.605201	1	0.0419669
C2_05110W_A	244.414	-0.366531	0.241947	-1.51492	0.129793	0.422934	1.57692
C2_05190W_A	97.3324	-0.365941	0.322685	-1.13405	0.256773	0.671461	0.956414
C5_04680W_A	158.567	-0.36509	0.260864	-1.39954	0.16165	0.41942	2.00674
C2_08920W_A	72.8906	-0.364936	0.294478	-1.23926	0.215248	0.630972	0.959252
C6_02030C_A	196.129	-0.364758	0.485166	-0.751823	0.452158	0.686854	1.57692
C4_05220C_A	30.2654	-0.364446	0.451567	-0.807069	0.419627	0.729368	1.26776
C6_00850W_A	198.406	-0.364348	0.332852	-1.09463	0.273681	0.579927	1.49658
C2_08990C_A	80.3646	-0.363991	0.295808	-1.2305	0.218511	0.566904	1.26776
CR_08590W_A	62.4643	-0.36389	0.338758	-1.07419	0.282738	0.66148	1.08811
C2_10060C_A	21.395	-0.363885	0.535321	-0.67975	0.496663	0.89088	0.921892
C7_00780W_A	66.7549	-0.363569	0.355819	-1.02178	0.306885	0.644153	1.26776
CR_00540C_A	272.924	-0.363362	0.284863	-1.27557	0.202109	0.459361	2.00674
C2_00810C_A	22.3626	-0.362967	0.512673	-0.707988	0.478953	0.85489	0.976496
CR_06110C_A	20.2863	-0.361741	0.6268	-0.577124	0.563856	0.940849	0.921892
C1_11250W_A	60.2065	-0.360989	0.369716	-0.976395	0.328869	0.740112	0.956414
C2_09620W_A	108.88	-0.360695	0.388674	-0.928014	0.3534	0.724238	1.08811
CR_09210W_A	93.5755	-0.359784	0.472735	-0.761068	0.446616	0.749877	1.26776
C6_02560W_A	3451.42	-0.359749	0.178298	-2.01768	0.0436242	0.284056	1.57692
C4_02940W_A	565.205	-0.359623	0.304263	-1.18195	0.237227	0.534364	1.57692
C1_02860C_A	98.6117	-0.359189	0.285861	-1.25652	0.208929	0.617782	0.971458
C4_03070W_A	62.097	-0.359127	0.573902	-0.625764	0.53147	0.853342	1.08811
C2_05060C_A	14.0428	-0.358043	0.757684	-0.472549	0.636535	1	0.0455872
CR_10030W_A	108.575	-0.357906	0.335975	-1.06528	0.28675	0.696642	0.971458
C1_08370W_A	830.536	-0.357857	0.328447	-1.08954	0.275916	0.512545	2.04559
C3_03870C_A	463.374	-0.3575	0.258365	-1.3837	0.16645	0.505235	1.26776
C3_04920C_A	207.922	-0.356295	0.310856	-1.14617	0.251723	0.492708	2.04559
CR_03600C_A	159.514	-0.355973	0.252023	-1.41246	0.157814	0.494865	1.26776
C1_10760W_A	47.4585	-0.354998	0.484663	-0.732465	0.463885	0.842817	0.992938
C3_03250W_A	57.3801	-0.354758	0.369938	-0.958966	0.337576	0.66897	1.26776
CR_01480W_A	34.3695	-0.354642	0.772207	-0.459258	0.646049	0.869428	1.26776
CR_07760W_A	31.1536	-0.354581	0.59596	-0.594974	0.551861	0.934911	0.921892
C1_13920W_A	162.199	-0.354365	0.448147	-0.790736	0.429098	0.675804	1.57692
C5_04100W_A	169.587	-0.353673	0.262849	-1.34554	0.178451	0.430326	2.04559
C6_04040C_A	370.587	-0.353264	0.289164	-1.22167	0.221832	0.521124	1.57692
C1_10990C_A	71.0178	-0.353159	0.408606	-0.864302	0.387422	0.785862	0.971458
C2_09820W_A	130.742	-0.3528	0.238333	-1.48029	0.138797	0.524056	0.959252
C2_03290W_A	30.0964	-0.352368	0.480624	-0.733146	0.463469	0.759804	1.26776
C1_07210C_A	99.3565	-0.352075	0.308587	-1.14093	0.253901	0.668308	0.956414
C3_05770C_A	30.7487	-0.351265	0.516951	-0.679493	0.496826	0.869244	0.976496
C3_07090W_A	231.959	-0.350524	0.206482	-1.6976	0.0895824	0.341206	2.00674
C4_00390W_A	88.7989	-0.350262	0.311415	-1.12474	0.260697	0.642682	1.08811
C6_04240W_A	7.10982	-0.350004	1.1534	-0.303455	0.761543	1	0.0469057
C5_02560C_A	120.183	-0.349034	0.265917	-1.31257	0.189328	0.598075	0.956414
C2_00080C_A	23.2451	-0.348877	0.855291	-0.407905	0.683344	1	0.921892
C1_00340W_A	87.3071	-0.348346	0.285768	-1.21898	0.222851	0.637933	0.956414
C5_01360W_A	10.0591	-0.34821	1.60982	-0.216304	0.828751	1	0.267755
C1_05910W_A	117.659	-0.346942	0.369219	-0.939666	0.347389	0.756143	0.971458
C2_06320W_A	114.419	-0.34619	0.2686	-1.28887	0.197444	0.609737	0.956414
C1_01490W_A	354.072	-0.346002	0.321659	-1.07568	0.28207	0.573775	1.57692
C1_05330C_A	20.3776	-0.345889	0.595401	-0.580934	0.561285	0.917577	0.976496
CR_04250W_A	0.449578	-0.345627	4.04672	-0.0854091	0.931936	1	0.0469057
C3_03370C_A	20.9055	-0.345242	0.511759	-0.674618	0.499918	0.871739	0.976496
C1_11310C_A	169.617	-0.343923	0.264029	-1.30259	0.192714	0.501987	1.49658
CR_07230W_A	147.784	-0.343293	0.242634	-1.41486	0.157108	0.456451	1.57692
CR_02050C_A	109.993	-0.342633	0.270139	-1.26836	0.20467	0.58619	1.08811
CR_04710W_A	7.14865	-0.342312	1.02722	-0.333242	0.738952	1	0.0469057
C3_05090C_A	76.0819	-0.342275	0.34534	-0.991122	0.321626	0.733079	0.956414
C6_02920C_A	51.2547	-0.342273	0.567623	-0.602993	0.546513	0.900572	0.992938
CR_06770C_A	69.0642	-0.342097	0.412595	-0.829134	0.407028	0.721449	1.26776
C3_05020W_A	34.685	-0.342044	0.528509	-0.647186	0.517511	0.907978	0.921892
C2_08240W_A	285.147	-0.341598	0.254436	-1.34257	0.179411	0.483305	1.57692
C7_02390W_A	82.4779	-0.341503	0.35551	-0.9606	0.336754	0.709379	1.08811
C3_06230W_A	120.092	-0.34131	0.310796	-1.09818	0.272127	0.684187	0.959252
C6_02430W_A	151.127	-0.34094	0.237995	-1.43255	0.151987	0.461142	1.49658
C1_03930W_A	30.62	-0.340929	0.516309	-0.660321	0.509048	0.871992	0.992938
CR_01980C_A	59.2287	-0.339659	0.388434	-0.874432	0.381883	0.785862	0.956414
C2_10470C_A	97.5302	-0.339473	0.314481	-1.07947	0.280378	0.659243	1.08811
C3_06060W_A	21.4187	-0.339423	0.662779	-0.512121	0.608567	0.86648	1.20398
C2_00260C_A	270.797	-0.33931	0.23097	-1.46906	0.141816	0.437874	1.57692
CR_10570C_A	27.6259	-0.339122	0.563231	-0.602102	0.547106	0.900572	0.992938
C1_09980C_A	64.1611	-0.338959	0.359386	-0.943163	0.345598	0.718705	1.08811
C4_04330C_A	137.956	-0.338172	0.381302	-0.886888	0.375139	0.741284	1.08811
C6_03520C_A	64.4262	-0.337521	0.491977	-0.686051	0.492681	0.874188	0.956414
C6_03470W_A	93.9389	-0.336882	0.409373	-0.822924	0.410551	0.723383	1.26776
C6_00810C_A	8.65417	-0.336611	1.28998	-0.260943	0.794136	1	0.0469057
C4_06950W_A	18.7642	-0.336387	0.723107	-0.465197	0.641791	1	0.0419669
C5_02370C_A	37.3167	-0.335901	0.525183	-0.639589	0.52244	0.912104	0.921892
C4_06480C_A	38.5297	-0.335764	0.53629	-0.626087	0.531258	0.801263	1.26776
C4_02860W_A	163.357	-0.335602	0.328968	-1.02017	0.30765	0.595289	1.57692
C1_07370C_A	16.7243	-0.335298	0.874591	-0.383376	0.701441	1	0.563951
C1_07490C_A	32.7279	-0.334829	0.729204	-0.459171	0.646111	1	0.921892
C3_04780C_A	141.707	-0.334682	0.25365	-1.31947	0.187013	0.591219	0.971458
C2_04980C_A	39.9543	-0.334661	0.656938	-0.509426	0.610454	0.867462	1.20398
CR_06790C_A	19.1422	-0.334559	0.888587	-0.376507	0.70654	1	0.0469057
C3_00220W_A	1162.63	-0.334315	0.380189	-0.879337	0.379219	0.581818	2.04559
C7_03830C_A	85.3412	-0.33366	0.323947	-1.02998	0.303018	0.717234	0.959252
C1_06940C_A	586.803	-0.332697	0.386055	-0.861785	0.388806	0.706767	1.26776
C1_03870C_A	38.9869	-0.331786	0.729668	-0.454709	0.649319	0.978428	0.976496
C6_01220C_A	122.813	-0.331769	0.27823	-1.19243	0.233093	0.642682	0.971458
C2_06690C_A	55.016	-0.331623	0.477862	-0.693973	0.487699	0.776033	1.26776
C1_11470C_A	22.7004	-0.331295	0.661716	-0.500661	0.61661	0.946941	0.992938
CR_01500W_A	106.749	-0.330395	0.326309	-1.01252	0.311289	0.686854	1.08811
C1_04790W_A	80.382	-0.330096	0.300167	-1.09971	0.27146	0.684187	0.956414
C5_04560C_A	446.567	-0.329736	0.308684	-1.0682	0.285431	0.51808	2.04559
C3_03300C_A	99.9535	-0.329718	0.270785	-1.21764	0.223362	0.635455	0.971458
C1_05780W_A	119.732	-0.329717	0.309148	-1.06653	0.286182	0.699292	0.956414
C3_03630W_A	7.68353	-0.329496	0.889267	-0.370526	0.710991	1	0.0455872
C7_03070C_A	363.205	-0.329149	0.22968	-1.43308	0.151836	0.451056	1.57692
C1_08440C_A	10.5665	-0.328655	0.951989	-0.34523	0.729921	1	0.267755
CR_09850C_A	0.364072	-0.328008	4.04657	-0.0810583	0.935396	1	0.563951
C5_03620W_A	59.5011	-0.32782	0.509584	-0.64331	0.520023	0.888619	0.971458
C6_02530C_A	118.191	-0.327443	0.36937	-0.886491	0.375353	0.780304	0.959252
C2_01820C_A	28.8565	-0.327384	0.473394	-0.691567	0.48921	0.86435	0.976496
C1_01070C_A	30.4184	-0.32672	0.504992	-0.646981	0.517644	0.907978	0.921892
C3_02890C_A	3.57846	-0.326676	1.45102	-0.225135	0.821874	1	0.0469057
C1_14050C_A	106.104	-0.326666	0.263856	-1.23804	0.2157	0.632722	0.956414
C2_08950W_A	43.9617	-0.326591	0.470135	-0.694675	0.487259	0.861874	0.976496
C6_01920C_A	121.59	-0.325929	0.387084	-0.842011	0.399782	0.801263	0.959252
C2_06020W_A	162.086	-0.32521	0.352296	-0.923115	0.355947	0.568888	2.04559
C7_00870W_A	3.77584	-0.324907	1.71203	-0.189779	0.849483	1	0.0455872
C1_08310W_A	100.061	-0.3247	0.326744	-0.993746	0.320347	0.653725	1.26776
C3_03720W_A	102.51	-0.324586	0.460623	-0.704667	0.481017	0.866015	0.956414
CR_04070W_A	90.0416	-0.324182	0.295144	-1.09838	0.272037	0.684187	0.959252
C4_04660C_A	112.833	-0.323634	0.291428	-1.11051	0.266779	0.613683	1.26776
C4_06030W_A	379.61	-0.323626	0.260174	-1.24388	0.213543	0.561472	1.26776
C6_04220C_A	164.066	-0.323527	0.364356	-0.887941	0.374572	0.696642	1.26776
C3_00850C_A	1173.45	-0.321953	0.234968	-1.3702	0.170625	0.47293	1.57692
C1_11920W_A	99.505	-0.321714	0.307578	-1.04596	0.29558	0.675804	1.08811
C1_03540C_A	21.2711	-0.321549	0.645687	-0.497995	0.618487	0.956066	0.976496
CR_07640C_A	36.4536	-0.321463	0.474792	-0.677062	0.498366	0.864842	0.992938
CR_05740C_A	81.381	-0.321283	0.39923	-0.804757	0.42096	0.729975	1.26776
C5_00240W_A	54.2993	-0.319982	0.396256	-0.807514	0.41937	0.804545	0.992938
C1_13810W_A	215.636	-0.319405	0.226687	-1.40902	0.15883	0.414283	2.04559
C6_00880W_A	96.9681	-0.319189	0.419464	-0.760944	0.44669	0.842044	0.959252
CR_08070W_A	80.793	-0.31845	0.337689	-0.943029	0.345666	0.676408	1.26776
C1_13450W_A	11.7879	-0.317785	0.914401	-0.347534	0.72819	1	0.267755
C7_03390C_A	218.917	-0.317767	0.250995	-1.26603	0.205502	0.462941	2.00674
CR_05030W_A	206.025	-0.317707	0.288526	-1.10114	0.270838	0.512545	2.00674
C2_05440W_A	85.927	-0.317698	0.383775	-0.827823	0.407771	0.807696	0.956414
C1_06980C_A	46.7471	-0.317539	0.545736	-0.581855	0.560664	0.938705	0.921892
C1_04950C_A	102.647	-0.317533	0.500685	-0.634196	0.525953	0.850755	1.08811
C7_00840C_A	18.4629	-0.317027	0.692751	-0.457635	0.647215	1	0.267755
C4_04860W_A	97.6407	-0.316348	0.326919	-0.967666	0.333211	0.73879	0.971458
C2_01520W_A	37.3976	-0.316178	0.424858	-0.744197	0.456758	0.757949	1.26776
C4_06890W_A	18.7656	-0.315925	0.607785	-0.519798	0.603204	1	0.0419669
CR_09590W_A	112.557	-0.315711	0.282368	-1.11809	0.26353	0.678784	0.959252
C1_04370C_A	53.1788	-0.31512	0.378078	-0.833478	0.404575	0.819924	0.921892
CR_07560W_A	217.975	-0.315016	0.43819	-0.718904	0.4722	0.639943	2.00674
C4_00630C_A	78.5184	-0.314955	0.504468	-0.624331	0.53241	0.904668	0.956414
C6_03450C_A	83.6853	-0.314286	0.391306	-0.803171	0.421876	0.777067	1.08811
C2_09380W_A	31.2794	-0.313818	0.494259	-0.634927	0.525476	0.89084	0.976496
C5_04090C_A	178.47	-0.313181	0.26177	-1.1964	0.231541	0.527343	1.57692
C4_04870C_A	406.884	-0.313149	0.268313	-1.1671	0.243169	0.488145	2.04559
C6_00950C_A	144.863	-0.31292	0.2307	-1.35639	0.174974	0.516503	1.26776
CR_09270C_A	526.448	-0.312896	0.287354	-1.08889	0.276203	0.569899	1.57692
C6_01120C_A	16.0558	-0.312895	0.691093	-0.452753	0.650727	1	0.563951
CR_03430W_A	27.2684	-0.312888	0.52997	-0.590388	0.554931	0.839143	1.20398
C1_07540C_A	353.253	-0.312726	0.324585	-0.963463	0.335315	0.667847	1.26776
C3_01450C_A	56.0984	-0.31246	0.364166	-0.858014	0.390885	0.708415	1.26776
CR_01730W_A	142.172	-0.311985	0.398951	-0.782012	0.434207	0.615514	2.04559
C1_08410C_A	157.251	-0.311868	0.412701	-0.755676	0.449844	0.624095	2.04559
C4_00100C_A	80.3624	-0.311593	0.357604	-0.871334	0.383572	0.782793	0.971458
C5_02630C_A	138.689	-0.310834	0.277621	-1.11964	0.262869	0.643696	1.08811
CR_10500C_A	27.426	-0.310833	0.765188	-0.406218	0.684582	0.995884	0.992938
CR_01060W_A	97.1199	-0.310564	0.256815	-1.20929	0.226551	0.573775	1.26776
C5_00930C_A	588.832	-0.310266	0.199707	-1.55361	0.120279	0.410502	1.57692
C2_08630C_A	92.8467	-0.309985	0.349974	-0.885736	0.37576	0.776991	0.971458
CR_08010W_A	18.2022	-0.309818	0.668237	-0.463634	0.64291	1	0.0455872
C1_07230W_A	453.846	-0.309478	0.172727	-1.79172	0.073178	0.353048	1.49658
CR_03690W_A	82.3597	-0.309391	0.341874	-0.904987	0.365472	0.68842	1.26776
C5_02860C_A	971.115	-0.308821	0.255299	-1.20965	0.226415	0.480299	2.00674
C2_01010W_A	3449.68	-0.308727	0.34905	-0.88448	0.376437	0.696755	1.26776
C1_08000W_A	17.6436	-0.30862	0.69073	-0.446802	0.655018	1	0.0455872
C4_04370C_A	53.0488	-0.308534	0.341572	-0.903277	0.366379	0.766248	0.976496
C4_02020W_A	162.757	-0.30853	0.240269	-1.2841	0.199106	0.509393	1.49658
C3_04700W_A	23.2104	-0.308488	0.545314	-0.565707	0.571593	0.946941	0.921892
C1_09320C_A	23.7885	-0.307488	0.564355	-0.544848	0.585858	0.840098	1.26776
C3_01690W_A	57.8441	-0.307408	0.448098	-0.686028	0.492696	0.872891	0.959252
CR_05730C_A	78.3884	-0.307372	0.367315	-0.836807	0.402701	0.803566	0.956414
C1_07340W_A	337.931	-0.307146	0.193872	-1.58427	0.113132	0.371887	2.00674
C6_02990W_A	58.6304	-0.306656	0.434894	-0.705128	0.48073	0.824091	1.08811
C3_02170C_A	346.053	-0.30657	0.27539	-1.11322	0.265614	0.611875	1.26776
C2_08160C_A	353.631	-0.305804	0.237918	-1.28533	0.198676	0.542398	1.26776
C5_03780C_A	19.2668	-0.305616	0.565704	-0.540239	0.589032	1	0.0469057
CR_03700C_A	71.8213	-0.305478	0.387415	-0.788504	0.430402	0.824493	0.971458
C1_08340C_A	42.5766	-0.305391	0.578003	-0.528355	0.597253	0.935837	0.992938
C4_01400W_A	4.47103	-0.305126	1.23667	-0.246731	0.805116	1	0.267755
C1_12110C_A	10.7829	-0.304677	0.874168	-0.348533	0.72744	1	0.267755
C2_03030W_A	148.216	-0.30463	0.275675	-1.10503	0.269145	0.565543	1.57692
C1_03620C_A	122.569	-0.303219	0.345287	-0.878164	0.379855	0.783798	0.959252
CR_10140W_A	238.988	-0.30292	0.247212	-1.22535	0.220445	0.528403	1.49658
C5_01100C_A	59.2644	-0.302819	0.372563	-0.812799	0.416333	0.816115	0.956414
CR_01540W_A	62.0668	-0.30265	0.362971	-0.833814	0.404386	0.801263	0.971458
CR_07600W_A	75.8225	-0.302416	0.463706	-0.652171	0.514291	0.845442	1.08811
C1_11690W_A	36.3422	-0.302396	0.501615	-0.602845	0.546612	0.93063	0.921892
C2_04490W_A	145.901	-0.30227	0.385709	-0.783673	0.433232	0.618698	2.00674
C1_10270C_A	84.9282	-0.301935	0.318812	-0.947062	0.343607	0.757502	0.956414
CR_01520W_A	306.113	-0.301318	0.253158	-1.19024	0.233952	0.542398	1.49658
C3_06940W_A	0.36754	-0.300733	3.34803	-0.089824	0.928427	1	0.563951
CR_10840C_A	1847.19	-0.300658	0.288962	-1.04048	0.298118	0.530098	2.00674
C1_07390W_A	172.684	-0.299931	0.310643	-0.965516	0.334287	0.555342	2.04559
C2_02090W_A	40.7412	-0.299757	0.607893	-0.493108	0.621936	0.875223	1.20398
C1_02780W_A	202.97	-0.299657	0.216807	-1.38213	0.16693	0.469207	1.57692
C1_04860W_A	174.239	-0.299592	0.278607	-1.07532	0.282232	0.62798	1.26776
C4_06040W_A	14.8614	-0.299573	0.858281	-0.349039	0.72706	1	0.563951
C5_03440W_A	74.6483	-0.297818	0.472572	-0.630206	0.52856	0.896179	0.971458
C1_13980C_A	30.4555	-0.296576	0.494719	-0.599484	0.54885	0.932186	0.921892
C4_01850C_A	10.3889	-0.294693	1.12541	-0.261854	0.793434	1	0.563951
C4_02320C_A	512.074	-0.294576	0.236647	-1.24479	0.213208	0.522612	1.49658
C1_08320W_A	2026.01	-0.294148	0.148393	-1.98222	0.0474543	0.268846	2.00674
C1_12080W_A	54.6646	-0.29345	0.444502	-0.660178	0.50914	0.805141	1.20398
C1_14200W_A	85.7389	-0.293371	0.291809	-1.00535	0.314727	0.723383	0.971458
C1_09470C_A	47.1744	-0.292524	0.468649	-0.624185	0.532506	0.896921	0.976496
C3_05410W_A	153.582	-0.292134	0.302935	-0.964345	0.334873	0.667718	1.26776
C3_00940W_A	194.205	-0.29187	0.319953	-0.912228	0.361649	0.643696	1.49658
C3_01030W_A	112.612	-0.291105	0.309187	-0.941517	0.34644	0.75807	0.959252
CR_05280W_A	0.516381	-0.291088	3.2869	-0.0885602	0.929431	1	0.0469057
C2_10010C_A	101.791	-0.290894	0.266485	-1.09159	0.275012	0.684187	0.971458
C2_09400C_A	188.362	-0.290866	0.211552	-1.37492	0.169157	0.510171	1.26776
C7_02800W_A	175.499	-0.290785	0.230242	-1.26296	0.206605	0.459658	2.04559
C1_11610C_A	65.7336	-0.290539	0.350725	-0.828394	0.407447	0.807507	0.956414
C2_03550C_A	112.517	-0.29034	0.25365	-1.14465	0.252354	0.63695	1.08811
C2_05670C_A	22.7577	-0.290044	0.735418	-0.394394	0.69329	1	0.921892
C1_10320W_A	58.7479	-0.289903	0.380226	-0.762449	0.445792	0.83754	0.971458
CR_03150W_A	148.597	-0.289439	0.312533	-0.926109	0.354389	0.631359	1.57692
CR_05300C_A	211.389	-0.289231	0.290898	-0.99427	0.320091	0.547068	2.00674
C4_02340W_A	254.564	-0.289151	0.350541	-0.824873	0.409444	0.677063	1.49658
C4_05150W_A	313.622	-0.289147	0.261964	-1.10376	0.269695	0.575629	1.49658
C3_07420W_A	173.66	-0.288718	0.29803	-0.968755	0.332668	0.62793	1.49658
C4_04550C_A	49.5385	-0.288581	0.438713	-0.657788	0.510674	0.881193	0.976496
CR_03830C_A	64.5813	-0.287848	0.341574	-0.842708	0.399392	0.796918	0.971458
C1_09860C_A	83.1534	-0.287723	0.311232	-0.924463	0.355245	0.761927	0.959252
CR_00070W_A	67.0909	-0.287616	1.9836	-0.144997	0.884713	1	0.959252
C5_00250C_A	11.6672	-0.287364	0.833636	-0.344711	0.730312	1	0.563951
C3_06920W_A	199.025	-0.286859	0.207234	-1.38423	0.166289	0.505062	1.26776
C3_05740C_A	33.2511	-0.286732	0.472854	-0.606385	0.544259	0.929135	0.921892
C6_00470C_A	79.9651	-0.286433	0.422683	-0.677654	0.497991	0.871992	0.971458
C1_06820W_A	49.2831	-0.286415	0.399446	-0.717031	0.473355	0.850755	0.976496
CR_03910C_A	68.2177	-0.286011	0.358287	-0.798273	0.424712	0.824356	0.959252
C7_00300W_A	107.67	-0.285822	0.369421	-0.773702	0.439107	0.789585	1.08811
C2_03360W_A	353.706	-0.28554	0.171101	-1.66884	0.0951491	0.388207	1.49658
C1_10500W_A	126.01	-0.285214	0.25959	-1.09871	0.271894	0.684187	0.959252
C2_08610W_A	270.043	-0.285045	0.196734	-1.44889	0.147369	0.407557	2.00674
C2_02620W_A	85.3809	-0.284411	0.385847	-0.737108	0.461057	0.846005	0.971458
C1_12070C_A	22.5051	-0.284305	0.613197	-0.463644	0.642903	0.973837	0.976496
C1_06690W_A	86.9649	-0.284076	0.422932	-0.671682	0.501786	0.875223	0.971458
C2_01390W_A	158.325	-0.28396	0.318375	-0.891905	0.372444	0.640341	1.57692
C2_07790C_A	9.6614	-0.28375	1.07674	-0.263527	0.792145	1	0.0469057
C5_01730W_A	6.41488	-0.283452	1.00924	-0.280858	0.778819	1	0.0419669
C1_06660W_A	409.48	-0.283402	0.273246	-1.03717	0.299657	0.587286	1.57692
C5_05040W_A	64.9576	-0.283362	0.423015	-0.669861	0.502946	0.875729	0.971458
C5_01450W_A	57.2907	-0.283123	0.640924	-0.441742	0.658676	0.936393	1.08811
C1_00500C_A	307.359	-0.283025	0.224814	-1.25893	0.208055	0.506753	1.57692
C4_02410C_A	2082.85	-0.282856	0.138725	-2.03897	0.0414526	0.275924	1.57692
C1_03920C_A	12.9476	-0.282602	1.10418	-0.255938	0.797999	1	0.267755
C1_11330C_A	321.996	-0.282318	0.19556	-1.44364	0.14884	0.456451	1.49658
C2_03230C_A	106.205	-0.282313	0.389421	-0.724955	0.46848	0.854525	0.956414
C6_03150C_A	57.2482	-0.281432	0.483727	-0.581799	0.560702	0.925462	0.959252
C5_03500W_A	607.35	-0.281247	0.156923	-1.79226	0.0730912	0.34822	1.57692
CR_01470W_A	1189.56	-0.281087	0.341228	-0.823752	0.410081	0.723383	1.26776
CR_08370W_A	135.961	-0.27985	0.285206	-0.981219	0.326485	0.736711	0.959252
CR_04730W_A	60.3836	-0.279838	0.32918	-0.850108	0.395265	0.712259	1.26776
C2_02320C_A	252.445	-0.279365	0.202007	-1.38295	0.166681	0.421158	2.04559
C5_02930C_A	341.237	-0.279243	0.259188	-1.07738	0.281313	0.573775	1.57692
C2_10230W_A	27.3758	-0.279159	0.556441	-0.501687	0.615888	0.953723	0.976496
CR_00990W_A	76.1853	-0.279143	0.346745	-0.805037	0.420798	0.729975	1.26776
C3_04180W_A	161.299	-0.278935	0.221938	-1.25682	0.20882	0.55662	1.26776
C2_00480C_A	92.7488	-0.278868	0.360536	-0.773484	0.439236	0.83754	0.956414
CR_04930W_A	112.013	-0.278389	0.282647	-0.984933	0.324657	0.657103	1.26776
CR_00280C_A	40.2264	-0.27796	0.687415	-0.404355	0.685952	0.893052	1.26776
C6_03920W_A	265.356	-0.277466	0.341217	-0.813166	0.416123	0.667329	1.57692
C4_04640C_A	27.6412	-0.277096	0.605497	-0.457634	0.647216	0.890745	1.20398
C1_08400C_A	383.146	-0.276858	0.2959	-0.935647	0.349455	0.56902	2.00674
C3_05870C_A	142.364	-0.276711	0.363478	-0.761287	0.446486	0.698245	1.49658
C4_03250C_A	56.9391	-0.276662	0.43639	-0.633977	0.526096	0.893598	0.971458
C5_04430C_A	135.293	-0.276661	0.271772	-1.01799	0.308683	0.684187	1.08811
C1_13480W_A	3558.16	-0.276491	0.256549	-1.07773	0.281153	0.627757	1.26776
C6_02460C_A	61.0692	-0.276488	0.402096	-0.687617	0.491694	0.871992	0.959252
C2_07590W_A	173.081	-0.276243	0.229654	-1.20286	0.229029	0.483305	2.00674
CR_01070W_A	19.1152	-0.275759	0.641135	-0.43011	0.667116	1	0.563951
C4_06270C_A	190.851	-0.275641	0.264642	-1.04156	0.297616	0.529864	2.00674
C3_07070C_A	13.4069	-0.275417	1.04233	-0.264232	0.791601	1	0.563951
C1_09240C_A	6.07735	-0.275289	1.18553	-0.232208	0.816376	1	0.0419669
CR_06530W_A	53.0604	-0.274849	0.36289	-0.757389	0.448817	0.763489	1.20398
C1_00650C_A	124.37	-0.274456	0.375276	-0.731343	0.464569	0.760503	1.26776
CR_10340W_A	806.725	-0.274443	0.175307	-1.5655	0.117466	0.409166	1.57692
C1_10520W_A	7.22506	-0.274425	0.971068	-0.282602	0.777482	1	0.0419669
C2_03330C_A	222.266	-0.274305	0.234084	-1.17182	0.241269	0.487575	2.04559
C2_07200W_A	66.5435	-0.274038	0.327823	-0.835933	0.403193	0.804047	0.956414
C3_07790W_A	55.5064	-0.273932	0.363082	-0.754462	0.450572	0.839563	0.976496
C7_03530C_A	17.0539	-0.273924	0.669293	-0.409274	0.682339	1	0.267755
C1_04570C_A	11.0071	-0.273868	1.13999	-0.240236	0.810147	1	0.267755
CR_04530W_A	173.518	-0.273766	0.265082	-1.03276	0.301716	0.534364	2.00674
C3_05150W_A	170.988	-0.273669	0.259407	-1.05498	0.291436	0.522612	2.04559
C3_05460W_A	50.7874	-0.273266	0.465881	-0.586558	0.557501	0.936197	0.921892
C1_07120W_A	354.548	-0.273252	0.346814	-0.787893	0.430759	0.617782	2.00674
C1_11200W_A	5895.06	-0.273214	0.315726	-0.865352	0.386845	0.587263	2.04559
C5_03350W_A	317.809	-0.273076	0.179079	-1.52489	0.127287	0.458444	1.26776
C1_09590C_A	0.454901	-0.272962	4.0461	-0.067463	0.946213	1	0.0419669
C1_09500W_A	0.506601	-0.272962	4.0461	-0.067463	0.946213	1	0.563951
C2_08350C_A	0.506601	-0.272962	4.0461	-0.067463	0.946213	1	0.0455872
C1_03970W_A	0.578555	-0.272962	4.0461	-0.067463	0.946213	1	0.0469057
C2_04470W_A	0.578555	-0.272962	4.0461	-0.067463	0.946213	1	0.267755
C1_02170C_A	19.9061	-0.272446	0.860365	-0.316663	0.751499	1	0.0419669
C5_00950C_A	91.2939	-0.272195	0.287164	-0.947874	0.343194	0.757195	0.956414
C1_08690W_A	31.7372	-0.272167	0.431436	-0.630839	0.528146	0.915973	0.921892
C1_01390C_A	28.0258	-0.271151	0.831842	-0.325964	0.744451	1	0.921892
C5_01880C_A	42.2232	-0.271005	0.642364	-0.421888	0.673107	1	0.921892
C7_02080W_A	46.8801	-0.270409	0.435162	-0.621399	0.534337	0.89084	0.992938
C1_00660C_A	76.8566	-0.270176	0.402916	-0.670552	0.502506	0.839792	1.08811
C6_04280W_A	218.671	-0.269927	0.372181	-0.725257	0.468294	0.635185	2.04559
C1_14310W_A	93.4852	-0.269518	0.305157	-0.883212	0.377122	0.782134	0.959252
CR_08350W_A	194.724	-0.268972	0.305483	-0.880479	0.3786	0.642682	1.57692
C1_10090C_A	186.796	-0.268583	0.306859	-0.875265	0.38143	0.582881	2.04559
C5_02970W_A	176.407	-0.267791	0.274762	-0.974631	0.329743	0.611875	1.57692
C6_03760C_A	1456.97	-0.267672	0.208933	-1.28114	0.200144	0.510307	1.49658
CR_03720W_A	1441.96	-0.267316	0.193986	-1.37801	0.168199	0.42428	2.00674
C1_01650W_A	288.016	-0.266518	0.244033	-1.09214	0.274771	0.580436	1.49658
C3_00880W_A	407.77	-0.266461	0.213976	-1.24528	0.213028	0.465632	2.04559
C3_00200C_A	343.584	-0.2664	0.186127	-1.43128	0.15235	0.461559	1.49658
C1_04480C_A	287.175	-0.265735	0.205246	-1.29471	0.195419	0.493843	1.57692
C1_12360C_A	442.966	-0.265723	0.233384	-1.13857	0.254883	0.564733	1.49658
C5_00370W_A	493.766	-0.265502	0.218987	-1.21241	0.225355	0.523002	1.57692
C4_04910C_A	14.8279	-0.264009	0.957214	-0.275809	0.782695	1	0.0469057
C1_12760W_A	55.7058	-0.263989	0.454304	-0.581085	0.561183	0.92049	0.971458
C1_09400C_A	26.6552	-0.263782	0.57273	-0.460569	0.645108	0.974656	0.976496
C4_02070W_A	10.3345	-0.263727	0.937921	-0.281183	0.77857	1	0.267755
C6_03340C_A	621.156	-0.263301	0.368501	-0.71452	0.474906	0.718588	1.49658
C3_07340W_A	573.672	-0.263284	0.18256	-1.44218	0.149252	0.446988	1.57692
CR_01660C_A	88.496	-0.262753	0.367822	-0.71435	0.475011	0.766082	1.26776
C7_00860W_A	287.005	-0.262655	0.264779	-0.991978	0.321208	0.617782	1.49658
C1_08130C_A	32.1773	-0.262524	0.451528	-0.581412	0.560963	0.824356	1.26776
CR_05990C_A	74.8809	-0.262507	0.334727	-0.784242	0.432898	0.827266	0.971458
C4_03720C_A	42.2739	-0.262428	0.495453	-0.529673	0.596339	0.940679	0.976496
C1_12820C_A	61.4415	-0.262242	0.446756	-0.586991	0.55721	0.916592	0.971458
C4_02670W_A	27.4576	-0.261788	0.480511	-0.544812	0.585883	0.935837	0.976496
C2_08910C_A	59.1765	-0.261737	0.385621	-0.678743	0.4973	0.835803	1.08811
C3_01210C_A	103.785	-0.261689	0.310795	-0.841999	0.399789	0.801263	0.959252
C3_06620W_A	88.6018	-0.261657	0.297105	-0.880689	0.378486	0.698245	1.26776
C1_01400C_A	104.887	-0.261481	0.303931	-0.860331	0.389607	0.70716	1.26776
CR_02800C_A	70.0622	-0.260869	0.462389	-0.564176	0.572634	0.883354	1.08811
C3_06050C_A	35.4304	-0.260622	0.411325	-0.633616	0.526332	0.818255	1.20398
C4_01360W_A	239.215	-0.260051	0.211055	-1.23215	0.217894	0.473528	2.00674
C1_10300W_A	361.831	-0.259573	0.254057	-1.02171	0.306918	0.6079	1.49658
C2_06850W_A	10.9648	-0.259025	1.15849	-0.223588	0.823078	1	0.0455872
C2_01470W_A	139.964	-0.258783	0.262663	-0.985226	0.324513	0.734723	0.959252
CR_08210C_A	715.395	-0.258597	0.184404	-1.40234	0.160814	0.497497	1.26776
C7_03280C_A	59.8927	-0.258423	0.505718	-0.511001	0.60935	0.951748	0.971458
C1_11670W_A	920.53	-0.257596	0.19085	-1.34973	0.177103	0.430326	2.04559
C1_07100C_A	20.5137	-0.256821	0.619358	-0.414657	0.678393	1	0.921892
CR_00820C_A	36.7447	-0.25655	0.739587	-0.346882	0.72868	1	0.921892
C7_03970C_A	33.7701	-0.256429	0.479748	-0.534508	0.59299	0.933797	0.992938
C2_03220C_A	158.984	-0.256239	0.439144	-0.583497	0.559558	0.682864	2.00674
C1_13870W_A	128.193	-0.25592	0.269268	-0.950428	0.341895	0.749877	0.971458
CR_06970C_A	37.7831	-0.255242	0.506169	-0.504264	0.614076	0.869728	1.20398
C3_00950C_A	20.6691	-0.255212	0.634405	-0.402285	0.687474	0.915758	1.20398
C1_13690C_A	133.169	-0.255186	0.305295	-0.835865	0.403231	0.800638	0.971458
C4_01100C_A	756.805	-0.25502	0.219271	-1.16304	0.244814	0.591908	1.26776
C4_05430C_A	249.605	-0.254967	0.228994	-1.11342	0.265527	0.561472	1.57692
C5_05150C_A	29.0683	-0.254132	0.588641	-0.431726	0.665941	0.982378	0.992938
CR_05050W_A	1312.46	-0.253768	0.15876	-1.59843	0.109946	0.39981	1.57692
CR_02020C_A	250.554	-0.253606	0.260221	-0.974578	0.32977	0.611875	1.57692
C4_06160W_A	17.6184	-0.25351	0.681319	-0.372088	0.709828	1	0.267755
C1_12290C_A	129.398	-0.253489	0.302254	-0.838662	0.401659	0.761373	1.08811
CR_03120W_A	167.182	-0.253324	0.277285	-0.913585	0.360935	0.643696	1.49658
CR_08930C_A	127.072	-0.253134	0.25576	-0.989731	0.322305	0.733079	0.959252
C1_08060W_A	232.204	-0.253117	0.308606	-0.820194	0.412106	0.678872	1.49658
CR_06300C_A	18.7628	-0.253093	0.806878	-0.313669	0.753773	1	0.0469057
C2_10660W_A	182.841	-0.25309	0.337481	-0.749937	0.453292	0.756143	1.26776
C2_02950W_A	62.0941	-0.252651	0.481941	-0.524237	0.600114	0.950458	0.959252
C1_02910C_A	22.1072	-0.251917	0.599105	-0.420489	0.674128	0.995969	0.976496
C1_14000C_A	99.2422	-0.251782	0.338364	-0.744116	0.456806	0.846283	0.959252
C4_01370W_A	264.789	-0.251402	0.222397	-1.13042	0.258299	0.566904	1.49658
C7_00380W_A	44.7378	-0.250785	0.493393	-0.508286	0.611253	0.942958	0.992938
C1_10330C_A	33.9886	-0.250667	0.751505	-0.333553	0.738717	1	0.976496
C3_02270W_A	4.74779	-0.250646	1.12866	-0.222074	0.824256	1	0.0419669
C2_09470C_A	31.0543	-0.250415	0.672582	-0.372319	0.709656	0.907061	1.26776
C1_02660C_A	33.5577	-0.250018	0.515125	-0.485353	0.627426	0.859834	1.26776
C5_04910W_A	15.5307	-0.250009	0.924582	-0.270402	0.786851	1	0.267755
C1_08330C_A	15.6619	-0.249993	0.936358	-0.266984	0.789482	1	0.563951
C1_00530C_A	105.394	-0.24969	0.362889	-0.68806	0.491415	0.831423	1.08811
C1_14090W_A	63.3058	-0.249487	0.318073	-0.784369	0.432824	0.831872	0.956414
C5_03210C_A	21.5527	-0.248823	0.766657	-0.324556	0.745517	1	0.992938
C2_00140W_A	141.993	-0.248705	0.303496	-0.819468	0.41252	0.811627	0.959252
C1_08510W_A	28.6309	-0.247623	0.568649	-0.435459	0.663229	1	0.921892
C5_04610W_A	86.1027	-0.247496	0.347247	-0.712739	0.476008	0.854525	0.971458
C7_02370W_A	123.1	-0.247322	0.438621	-0.563863	0.572847	0.928519	0.971458
C2_07410W_A	39.2466	-0.247182	0.48023	-0.514716	0.606752	0.940679	0.992938
C6_03630W_A	28.5882	-0.24686	0.575334	-0.429073	0.66787	0.993034	0.976496
C4_06250C_A	114.029	-0.246718	0.400281	-0.616362	0.537655	0.901801	0.971458
C3_03400C_A	121.738	-0.246675	0.351955	-0.70087	0.483384	0.86648	0.959252
C2_08940C_A	57.6823	-0.246438	0.430341	-0.572658	0.566876	0.929339	0.959252
C5_02920W_A	54.665	-0.246077	0.380268	-0.647114	0.517558	0.907978	0.921892
CR_02360W_A	45.4353	-0.245933	0.466705	-0.526955	0.598225	0.967133	0.921892
[truncated: 4,131 more rows]

## Sheet: ste11- vs. WT+
	baseMean	log2FoldChange	lfcSE	stat	pvalue	padj	weight
C2_08210C_A	643.948	-12.8821	1.38951	-9.27095	1.84502e-20	2.82136e-18	2.88894
CR_02330C_A	284.77	-11.7099	1.39605	-8.38789	4.9494e-17	6.4825e-15	2.9232
C1_11630C_A	235.241	-11.4177	1.39931	-8.15949	3.36435e-16	3.91833e-14	2.90062
C6_01310W_A	206.558	-11.2363	1.40039	-8.02373	1.02583e-15	1.11965e-13	2.9232
C1_06220C_A	200.797	-11.2142	1.40292	-7.99345	1.31209e-15	1.34307e-13	2.9232
C1_11340W_A	199.475	-11.192	1.40087	-7.98933	1.35669e-15	1.34307e-13	2.90062
C4_04790W_A	162.071	-10.9053	1.40711	-7.7501	9.18185e-15	8.29675e-13	2.88894
C4_03520C_A	162.573	-10.9012	1.40523	-7.75758	8.65656e-15	8.16159e-13	2.90062
C3_04450C_A	134.606	-10.6179	1.4097	-7.53202	4.99605e-14	4.08974e-12	2.9232
C1_04050C_A	81.5447	-9.8856	1.43076	-6.90935	4.86895e-12	3.22637e-10	2.88894
C3_06510C_A	72.2669	-9.68981	1.44694	-6.69676	2.13089e-11	1.2459e-09	2.88894
C2_00460W_A	59.148	-9.45497	1.45672	-6.49059	8.55005e-11	4.66603e-09	2.9232
CR_03510W_A	45.5255	-9.02699	1.47993	-6.09961	1.06326e-09	5.3562e-08	2.9232
C1_04870W_A	35.254	-8.66515	1.50564	-5.75511	8.65862e-09	3.82505e-07	2.88894
CR_09930W_A	29.0557	-8.38316	1.53494	-5.46155	4.72001e-08	1.91708e-06	2.66788
C4_03510C_A	50.1168	-8.15937	1.21889	-6.69412	2.16968e-11	1.33445e-09	2.66788
C5_03750W_A	22.8532	-8.04585	1.58534	-5.07516	3.87169e-07	1.34426e-05	2.66788
C6_02510C_A	22.4624	-8.03206	1.59159	-5.04658	4.49795e-07	1.40267e-05	2.9232
C1_12090C_A	22.3739	-7.99792	1.59443	-5.01614	5.27187e-07	1.60583e-05	2.90062
C1_10810W_A	20.6212	-7.91103	1.61891	-4.88665	1.02565e-06	0.000568717	0.126307
C3_00320W_A	21.3228	-7.88354	1.66333	-4.73961	2.14129e-06	0.0011191	0.126307
C3_02300W_A	903.572	-7.5097	0.301369	-24.9186	4.67445e-137	9.18356e-134	2.9232
C4_03900C_A	187.387	-7.49136	0.594791	-12.5949	2.25137e-36	8.91509e-34	2.90062
C2_04970W_A	14.4291	-7.36488	1.74428	-4.22232	2.41806e-05	0.00980236	0.123191
C4_03500C_A	12.3945	-7.14448	1.80786	-3.9519	7.75315e-05	0.02591	0.12275
C6_02830W_A	11.8123	-7.07924	1.83043	-3.86753	0.000109945	0.033892	0.123191
C6_01020W_A	9.77365	-6.82563	1.94656	-3.50651	0.000454032	0.0969213	0.126307
C1_05840W_A	9.48772	-6.75897	1.93462	-3.4937	0.000476376	0.181912	0.0561166
C4_02180C_A	8.81298	-6.62913	1.96613	-3.37166	0.000747162	0.138663	0.126307
C6_00810C_A	8.51672	-6.61629	2.00088	-3.3067	0.000944031	0.169224	0.12275
CR_03490W_A	154.507	-6.38157	0.934711	-6.82732	8.65177e-12	6.00782e-10	2.66788
C5_02160W_A	139.856	-6.30079	0.524959	-12.0024	3.44961e-33	1.11611e-30	2.95837
C4_04280C_A	7.26805	-6.30006	2.08552	-3.02086	0.00252056	0.53629	0.0561166
C2_03690C_A	6.87304	-6.2874	2.08625	-3.01374	0.00258052	0.353019	0.12275
C2_00080C_A	229.029	-6.26525	0.832894	-7.52226	5.38377e-14	4.23084e-12	2.9232
C6_01010W_A	6.57885	-6.24971	2.15101	-2.90547	0.00366698	1	0
C1_12930C_A	6.59124	-6.13822	2.15998	-2.8418	0.00448602	1	0
C1_10550C_A	6.39374	-6.13234	2.12144	-2.89065	0.00384452	1	0
C1_10980W_A	23.5458	-5.91272	1.16425	-5.07856	3.80297e-07	1.34204e-05	2.66788
C2_00560W_A	5.03599	-5.79732	2.24507	-2.58224	0.00981609	1	0
C3_00440W_A	5.431	-5.77452	4.77041	-1.21049	0.226092	1	0
C2_04530W_A	5.431	-5.77452	4.77041	-1.21049	0.226092	1	0
C5_04180W_A	4.84261	-5.73412	2.27146	-2.52442	0.011589	1	0
C2_08240W_A	337.231	-5.6504	0.319081	-17.7084	3.61475e-70	2.36722e-67	2.9232
C2_03770C_A	4.06085	-5.53505	2.66765	-2.07488	0.0379981	1	0
C1_03900W_A	4.26249	-5.52605	2.36389	-2.33769	0.0194031	1	0
C2_05400W_A	4.06912	-5.44949	2.40012	-2.27051	0.0231767	1	0
C2_00510W_A	3.97243	-5.40965	2.41952	-2.23583	0.0253628	1	0
CR_06610W_A	74.2835	-5.32323	0.620926	-8.57305	1.00776e-17	1.43097e-15	2.88894
C3_04480C_A	15.7224	-5.27348	1.42238	-3.70749	0.000209322	0.0556442	0.12275
C5_01190W_A	3.28736	-5.22362	2.82622	-1.84827	0.0645628	1	0
C7_00040C_A	3.28736	-5.22362	2.82622	-1.84827	0.0645628	1	0
C2_01820C_A	3.39024	-5.19087	2.52405	-2.05656	0.0397284	1	0
C2_02220C_A	3.19067	-5.17967	2.84949	-1.81775	0.069102	1	0
C6_01680C_A	3.39231	-5.14458	2.56274	-2.00745	0.0447015	1	0
C7_03470W_A	3.19893	-5.04451	2.62726	-1.92006	0.0548501	1	0
C5_02240W_A	3.19893	-5.04451	2.62726	-1.92006	0.0548501	1	0
C1_08520C_A	3.10018	-5.04346	2.59654	-1.94238	0.0520912	1	0
C6_04230W_A	3.10225	-4.99191	2.6653	-1.87292	0.0610792	1	0
C5_01310W_A	3.10225	-4.99191	2.6653	-1.87292	0.0610792	1	0
C5_04390C_A	3.10225	-4.99191	2.6653	-1.87292	0.0610792	1	0
C1_11290W_A	3.10225	-4.99191	2.6653	-1.87292	0.0610792	1	0
C2_05770W_A	2.80392	-4.98957	2.953	-1.68966	0.0910927	1	0
C5_00740W_A	3.00556	-4.93753	2.7099	-1.82203	0.0684502	1	0
C1_05000W_A	2.81012	-4.8792	2.68329	-1.81836	0.0690085	1	0
C5_00670C_A	2.71343	-4.82	2.71664	-1.77425	0.0760213	1	0
C3_01040C_A	2.41717	-4.77145	3.07789	-1.55023	0.121086	1	0
C1_04460C_A	2.7155	-4.76853	3.13377	-1.52166	0.128094	1	0
C5_04830W_A	2.7155	-4.76853	3.13377	-1.52166	0.128094	1	0
C4_07170C_A	2.7155	-4.76853	3.13377	-1.52166	0.128094	1	0
C1_05400C_A	2.7155	-4.76853	3.13377	-1.52166	0.128094	1	0
C7_02360W_A	2.7155	-4.76853	3.13377	-1.52166	0.128094	1	0
C2_08890W_A	2.7155	-4.76853	3.13377	-1.52166	0.128094	1	0
C5_00880C_A	2.7155	-4.76853	3.13377	-1.52166	0.128094	1	0
C3_02880W_A	2.7155	-4.76853	3.13377	-1.52166	0.128094	1	0
C4_01090C_A	2.7155	-4.76853	3.13377	-1.52166	0.128094	1	0
C4_05840W_A	2.7155	-4.76853	3.13377	-1.52166	0.128094	1	0
CR_09780C_A	21.895	-4.73396	1.10087	-4.30022	1.70629e-05	0.000418763	2.88894
C3_05080W_A	2.32049	-4.71148	3.11357	-1.51321	0.130227	1	0
C1_13730C_A	2.2238	-4.64898	3.15141	-1.47521	0.140157	1	0
C2_00090W_A	2.2238	-4.64898	3.15141	-1.47521	0.140157	1	0
C3_00610W_A	2.32462	-4.62872	2.82051	-1.64109	0.100778	1	0
C1_07100C_A	4.8177	-4.62676	2.06957	-2.23562	0.0253769	1	0
C3_02870C_A	2.42337	-4.62642	2.83809	-1.63012	0.103077	1	0
CR_04800W_A	7.01659	-4.61616	1.8151	-2.5432	0.0109842	0.73842	0.123191
C1_09130W_A	17.2831	-4.5838	1.23671	-3.70645	0.000210181	0.0332392	0.242098
C5_03310C_A	48.8633	-4.57014	0.679244	-6.72828	1.71683e-11	1.11992e-09	2.66788
C6_00840W_A	49.8393	-4.56624	0.800189	-5.70645	1.15358e-08	4.92685e-07	2.9232
CR_04540C_A	2.32669	-4.55587	2.89031	-1.57626	0.114967	1	0
C2_00800C_A	2.13125	-4.48514	2.89834	-1.54749	0.121746	1	0
CR_04060C_A	2.23	-4.48207	2.95475	-1.51691	0.129291	1	0
C2_03970W_A	1.93374	-4.4438	3.28069	-1.35453	0.175566	1	0
C6_01870C_A	20.3252	-4.43958	1.11315	-3.9883	6.65488e-05	0.0222492	0.126307
CR_06460W_A	10.7479	-4.43391	1.53558	-2.88744	0.00388391	0.45723	0.123191
C3_03450C_A	10.5524	-4.41912	1.54243	-2.86504	0.0041696	0.306225	0.242098
C5_03110C_A	1.83705	-4.36851	3.33025	-1.31177	0.189598	1	0
C3_05400C_A	2.03663	-4.33126	3.37986	-1.28149	0.200022	1	0
C1_08960W_A	2.03663	-4.33126	3.37986	-1.28149	0.200022	1	0
CR_05040W_A	2.03663	-4.33126	3.37986	-1.28149	0.200022	1	0
C6_03790C_A	9.39014	-4.25678	1.60879	-2.64596	0.00814601	0.854055	0.0561166
CR_09470W_A	38.3153	-4.24749	0.791686	-5.36512	8.08939e-08	2.94308e-06	2.9232
C2_04350C_A	1.64368	-4.20528	3.44211	-1.22171	0.221816	1	0
C2_04510W_A	37.2988	-4.1902	0.817412	-5.12617	2.95691e-07	1.00939e-05	2.90062
C6_02200C_A	1.7445	-4.14552	3.10363	-1.3357	0.181648	1	0
C6_01000C_A	8.61664	-4.12519	1.65816	-2.48781	0.0128532	0.772872	0.123191
C1_06040W_A	28.6061	-4.1177	0.898036	-4.58522	4.53499e-06	0.0001222	2.90062
C4_01340W_A	1.54699	-4.11634	3.50545	-1.17427	0.240288	1	0
C5_03060C_A	1.54699	-4.11634	3.50545	-1.17427	0.240288	1	0
CR_02340W_A	1.54699	-4.11634	3.50545	-1.17427	0.240288	1	0
C4_06290W_A	3.36533	-4.06979	2.3127	-1.75976	0.0784493	1	0
C1_02670C_A	1.4503	-4.02181	3.57362	-1.12541	0.260413	1	0
CR_05940W_A	168.418	-4.01061	0.355058	-11.2957	1.37863e-29	3.34537e-27	2.95837
C2_01250W_A	1.45237	-3.95321	3.26012	-1.2126	0.225284	1	0
C4_04380C_A	14.3285	-3.95239	1.31895	-2.99663	0.00272983	0.555411	0.0561166
C1_10290W_A	1.55112	-3.93999	3.25683	-1.20976	0.226369	1	0
C1_02540C_A	1.55112	-3.93999	3.25683	-1.20976	0.226369	1	0
C1_06160W_A	7.55102	-3.93839	1.72644	-2.28122	0.0225356	0.73842	0.242098
C4_06860C_A	9.27887	-3.93561	1.76458	-2.23034	0.0257252	0.916057	0.12275
C5_01620C_A	1.35362	-3.92103	3.64623	-1.07537	0.282211	1	0
C6_01160W_A	7.55928	-3.89597	1.90279	-2.0475	0.040609	1	0.123191
C1_07370C_A	30.9298	-3.88272	0.859217	-4.5189	6.21614e-06	0.00016069	2.9232
C1_07930C_A	4.60355	-3.87866	2.17657	-1.782	0.0747488	1	0
C6_02480W_A	1.25693	-3.81309	3.72395	-1.02394	0.305866	1	0
C3_04440C_A	1.25693	-3.81309	3.72395	-1.02394	0.305866	1	0
CR_08470W_A	9.72913	-3.80519	1.5709	-2.4223	0.0154224	0.810387	0.12275
C2_04700C_A	6.87834	-3.75698	1.8457	-2.03554	0.0417968	1	0.0561166
C4_02220C_A	6.78166	-3.7349	1.86012	-2.00788	0.0446558	1	0
C1_01980W_A	1.35775	-3.7138	3.78401	-0.981445	0.326373	1	0
C6_01520W_A	1.35775	-3.7138	3.78401	-0.981445	0.326373	1	0
CR_06580W_A	1.16024	-3.69684	3.80767	-0.970895	0.331601	1	0
C1_09120W_A	1.16024	-3.69684	3.80767	-0.970895	0.331601	1	0
C4_01070W_A	1.16024	-3.69684	3.80767	-0.970895	0.331601	1	0
C4_03820C_A	1.16024	-3.69684	3.80767	-0.970895	0.331601	1	0
C2_03370W_A	1.16024	-3.69684	3.80767	-0.970895	0.331601	1	0
C5_03030W_A	4.95918	-3.68024	1.98068	-1.85807	0.0631597	1	0
C2_05540C_A	11.5246	-3.64494	1.49033	-2.44574	0.0144557	0.796079	0.123191
C1_08820C_A	3.72717	-3.6389	2.19693	-1.65636	0.0976495	1	0
C3_06780C_A	5.41151	-3.57833	2.18327	-1.63898	0.101218	1	0
C7_02010C_A	5.41151	-3.57833	2.18327	-1.63898	0.101218	1	0
CR_04980C_A	1.06356	-3.57086	3.89853	-0.91595	0.359693	1	0
C1_06030C_A	5.61315	-3.52069	1.88493	-1.86781	0.0617888	1	0
C5_01910W_A	5.61315	-3.52069	1.88493	-1.86781	0.0617888	1	0
C1_13030C_A	141.907	-3.51825	0.35218	-9.98993	1.68702e-23	3.31437e-21	2.9232
C1_02350W_A	11.113	-3.43614	1.51538	-2.26751	0.0233592	0.742515	0.242098
C1_04080W_A	0.96687	-3.43328	3.99812	-0.858724	0.390493	1	0
C1_05100W_A	7.40657	-3.40278	1.73612	-1.95999	0.0499965	1	0.0561166
C2_04280W_A	13.5645	-3.37471	1.58728	-2.12609	0.0334957	0.962515	0.123191
C2_08540C_A	9.19587	-3.34868	1.59062	-2.10526	0.0352685	1	0.0561166
C1_09530W_A	44.5016	-3.31643	0.624562	-5.31	1.09624e-07	4.21397e-06	2.66788
C2_00620C_A	0.870183	-3.28168	4.10869	-0.798716	0.424455	1	0
C1_05710C_A	0.870183	-3.28168	4.10869	-0.798716	0.424455	1	0
C1_08240C_A	0.870183	-3.28168	4.10869	-0.798716	0.424455	1	0
C2_01570W_A	0.870183	-3.28168	4.10869	-0.798716	0.424455	1	0
C3_04570C_A	0.870183	-3.28168	4.10869	-0.798716	0.424455	1	0
C1_04470C_A	0.870183	-3.28168	4.10869	-0.798716	0.424455	1	0
CR_07870W_A	4.74296	-3.25118	1.99996	-1.62563	0.104029	1	0
C4_00860C_A	9.08861	-3.23325	1.55732	-2.07617	0.0378785	0.992051	0.123191
C6_04510C_A	4.64628	-3.21766	2.01582	-1.59621	0.110442	1	0
C7_01170C_A	4.64628	-3.21766	2.01582	-1.59621	0.110442	1	0
C2_06040C_A	8.32362	-3.21196	1.64443	-1.95324	0.0507916	0.916057	0.242098
C7_01620C_A	54.7413	-3.20389	0.715975	-4.47486	7.64603e-06	0.000192767	2.95837
C4_03400W_A	7.28911	-3.17388	1.85619	-1.70989	0.0872861	1	0.242098
C4_02130W_A	4.4529	-3.148	2.04953	-1.53596	0.124548	1	0
C1_06370C_A	15.5795	-3.13779	1.2107	-2.5917	0.00955021	0.8837	0.0561166
CR_07700W_A	2.66154	-3.13695	2.44371	-1.28368	0.199252	1	0
C4_03430W_A	16.1306	-3.12478	1.18691	-2.6327	0.00847097	0.666756	0.123191
C2_08470C_A	3.60763	-3.11708	2.24772	-1.38678	0.16551	1	0
C1_06750W_A	5.30437	-3.11385	2.12461	-1.46561	0.142755	1	0
C2_10780C_A	4.45497	-3.11377	2.09649	-1.48523	0.137483	1	0
C7_01370W_A	4.45497	-3.11377	2.09649	-1.48523	0.137483	1	0
C2_10340W_A	0.773496	-3.11273	4.23354	-0.735255	0.462184	1	0
C1_05080W_A	0.773496	-3.11273	4.23354	-0.735255	0.462184	1	0
C1_06260W_A	0.773496	-3.11273	4.23354	-0.735255	0.462184	1	0
C7_02650W_A	0.773496	-3.11273	4.23354	-0.735255	0.462184	1	0
C4_05780C_A	0.773496	-3.11273	4.23354	-0.735255	0.462184	1	0
C1_09040C_A	0.773496	-3.11273	4.23354	-0.735255	0.462184	1	0
C2_09840W_A	0.773496	-3.11273	4.23354	-0.735255	0.462184	1	0
C2_06890C_A	0.773496	-3.11273	4.23354	-0.735255	0.462184	1	0
C5_03410C_A	0.773496	-3.11273	4.23354	-0.735255	0.462184	1	0
C2_03710W_A	0.773496	-3.11273	4.23354	-0.735255	0.462184	1	0
C5_03810C_A	0.773496	-3.11273	4.23354	-0.735255	0.462184	1	0
C6_03070C_A	1.81627	-3.0714	2.81163	-1.09239	0.274661	1	0
CR_06960W_A	9.99673	-3.06582	4.02986	-0.760775	0.446791	1	0.12275
C1_03180W_A	5.95627	-3.06097	1.92795	-1.58768	0.112359	1	0
CR_05890C_A	16.6982	-3.05563	1.19818	-2.55023	0.0107653	0.725733	0.126307
C3_07830W_A	15.9072	-3.05013	4.62149	-0.659988	0.509262	1	0.242098
C1_09390W_A	4.81474	-3.01107	1.98172	-1.51942	0.128657	1	0
C2_01630W_A	13.7322	-3.0071	1.29369	-2.32444	0.0201022	0.721423	0.242098
C2_07220W_A	32.7749	-3.00395	0.814512	-3.68804	0.000225991	0.00439593	2.9232
C4_01650C_A	11.4947	-2.98609	1.43242	-2.08465	0.0371007	0.983081	0.123191
C1_01800W_A	14.9828	-2.98558	1.30221	-2.29271	0.0218646	0.892257	0.123191
C7_02550C_A	6.32017	-2.96508	1.96894	-1.50593	0.132085	1	0
CR_06820W_A	5.36995	-2.96238	1.89844	-1.56043	0.118657	1	0
C2_05180W_A	0.676809	-2.92177	4.37795	-0.667382	0.504528	1	0
C1_13100W_A	0.676809	-2.92177	4.37795	-0.667382	0.504528	1	0
C6_02000W_A	0.676809	-2.92177	4.37795	-0.667382	0.504528	1	0
C5_01900C_A	0.676809	-2.92177	4.37795	-0.667382	0.504528	1	0
C1_11050W_A	0.676809	-2.92177	4.37795	-0.667382	0.504528	1	0
C1_01280C_A	0.676809	-2.92177	4.37795	-0.667382	0.504528	1	0
C5_04850W_A	0.676809	-2.92177	4.37795	-0.667382	0.504528	1	0
C1_00970W_A	0.676809	-2.92177	4.37795	-0.667382	0.504528	1	0
C1_08760W_A	5.37408	-2.90966	1.96387	-1.48159	0.138449	1	0
CR_06090W_A	11.2702	-2.88336	1.40882	-2.04666	0.0406919	0.883324	0.242098
C1_13160W_A	4.52674	-2.87636	2.07842	-1.38391	0.166385	1	0
CR_04890W_A	3.77609	-2.87137	2.19723	-1.30681	0.191277	1	0
CR_02580W_A	3.77609	-2.87137	2.19723	-1.30681	0.191277	1	0
C1_12440W_A	3.77609	-2.87137	2.19723	-1.30681	0.191277	1	0
C4_01010C_A	149.834	-2.8707	0.351762	-8.16093	3.32459e-16	3.91833e-14	2.90062
C2_01180W_A	2.2748	-2.8675	2.57221	-1.1148	0.264936	1	0
C6_04200C_A	2.37355	-2.85544	2.63977	-1.0817	0.279386	1	0
CR_05250C_A	7.03558	-2.8498	1.72085	-1.65604	0.0977137	1	0.126307
C6_00690W_A	8.88053	-2.84578	1.81117	-1.57124	0.116128	1	0.123191
C1_00880W_A	3.28439	-2.84551	2.5242	-1.12729	0.259619	1	0
C3_07900C_A	4.9832	-2.84171	1.95098	-1.45655	0.14524	1	0
CR_05160C_A	4.3313	-2.83689	2.06749	-1.37214	0.17002	1	0
C6_02210W_A	3.58065	-2.83006	2.2019	-1.28528	0.198694	1	0
C4_06510C_A	6.48863	-2.82883	1.92765	-1.4675	0.14224	1	0
CR_09150W_A	3.67941	-2.82699	2.22425	-1.27098	0.203734	1	0
C5_02150C_A	44.2934	-2.81385	1.80248	-1.5611	0.118501	0.517936	2.95837
C4_05700W_A	1.9806	-2.80127	2.94318	-0.951783	0.341207	1	0
C1_02450C_A	2.93082	-2.79431	2.78221	-1.00435	0.315211	1	0
C2_01420C_A	31.7408	-2.78767	0.834135	-3.34199	0.000831801	0.0135156	2.88894
C3_07550C_A	3.48397	-2.78367	2.22403	-1.25163	0.210704	1	0
C3_03390C_A	3.58272	-2.78128	2.25375	-1.23407	0.217178	1	0
CR_02280W_A	14.6015	-2.77434	1.24139	-2.23487	0.0254259	0.772872	0.242098
C4_03910W_A	16.1994	-2.77354	1.17279	-2.36491	0.0180345	1	0.0561166
C1_07360W_A	65.7385	-2.77333	2.0777	-1.33481	0.181939	0.637443	2.90062
C5_02610C_A	50.0463	-2.77264	1.96019	-1.41448	0.157222	0.5976	2.88894
C2_09690C_A	16.6599	-2.76681	1.16109	-2.38294	0.0171748	0.833713	0.126307
C7_03580C_A	6.64883	-2.76088	1.7493	-1.57828	0.114502	1	0
C2_03920C_A	11.0519	-2.75679	1.41737	-1.945	0.0517748	1	0.123191
C3_00300W_A	9.75431	-2.74946	1.60026	-1.71813	0.0857729	1	0.12275
C6_01300W_A	22.92	-2.72675	0.965145	-2.82522	0.00472475	0.0533258	2.95837
CR_07740W_A	0.580122	-2.72635	4.55213	-0.598919	0.549227	1	0
C4_06900W_A	0.580122	-2.72635	4.55213	-0.598919	0.549227	1	0
C5_02800C_A	0.580122	-2.72635	4.55213	-0.598919	0.549227	1	0
C1_05220C_A	0.580122	-2.72635	4.55213	-0.598919	0.549227	1	0
C2_05990C_A	0.580122	-2.72635	4.55213	-0.598919	0.549227	1	0
C7_00240W_A	0.580122	-2.72635	4.55213	-0.598919	0.549227	1	0
C3_02790W_A	0.580122	-2.72635	4.55213	-0.598919	0.549227	1	0
C3_00340W_A	0.580122	-2.72635	4.55213	-0.598919	0.549227	1	0
C3_02190C_A	8.61072	-2.69924	1.58647	-1.70141	0.0888657	1	0.123191
C1_13390W_A	5.15166	-2.69902	1.92338	-1.40327	0.160536	1	0
C4_03300C_A	5.15166	-2.69902	1.92338	-1.40327	0.160536	1	0
C1_03150C_A	15.5882	-2.68894	1.21411	-2.21475	0.0267774	1	0.0561166
C4_02230C_A	3.38935	-2.68601	2.32361	-1.15596	0.247696	1	0
C1_04900W_A	3.38935	-2.68601	2.32361	-1.15596	0.247696	1	0
C2_09700W_A	18.9879	-2.67512	1.0876	-2.45966	0.013907	0.95328	0.0561166
C4_04300C_A	4.49977	-2.6739	2.0326	-1.31551	0.188338	1	0
C2_05510C_A	7.11148	-2.67017	1.70904	-1.56238	0.118199	1	0.123191
C3_06470W_A	4.00807	-2.66985	2.36918	-1.12691	0.259782	1	0
C6_01880W_A	29.505	-2.66168	0.749486	-3.55134	0.000383275	0.00693621	2.9232
C3_03310C_A	2.89765	-2.65666	2.61711	-1.01512	0.310051	1	0
C7_01890C_A	10.4801	-2.65548	1.56672	-1.69494	0.0900872	1	0.126307
C3_00800W_A	99.0827	-2.64706	0.390229	-6.78335	1.17419e-11	7.89882e-10	2.66788
C1_12690C_A	3.29266	-2.63683	2.36735	-1.11383	0.26535	1	0
C2_06750C_A	5.71307	-2.63622	2.00426	-1.31531	0.188406	1	0
C3_02630C_A	21.112	-2.63491	1.01278	-2.60167	0.00927715	0.878805	0.0561166
CR_10110W_A	127.961	-2.63031	0.362624	-7.25354	4.06004e-13	2.81487e-11	2.95837
C6_01430C_A	6.36497	-2.62802	1.8476	-1.4224	0.154911	1	0
C2_10190C_A	11.5905	-2.62041	1.44541	-1.81292	0.0698437	1	0.0561166
C2_00960C_A	6.26828	-2.60429	1.86495	-1.39644	0.162582	1	0
C3_01790C_A	6.72474	-2.57931	1.74744	-1.47605	0.139931	1	0
C2_01070W_A	18.5637	-2.57128	1.27347	-2.01911	0.0434761	1	0.12275
C4_00520W_A	7.38077	-2.56749	1.74603	-1.47048	0.141433	1	0.0561166
C2_10760C_A	14.3727	-2.56688	1.31731	-1.94858	0.0513456	1	0.0561166
C3_02640C_A	32.2164	-2.56413	0.766967	-3.34321	0.000828164	0.0134466	2.9232
C2_01880C_A	6.62805	-2.55561	1.7579	-1.45378	0.146007	1	0
C3_05510W_A	11.5594	-2.55404	1.38529	-1.84369	0.0652286	1	0.12275
CR_05620C_A	5.42094	-2.55195	1.9581	-1.30328	0.192479	1	0
C3_04620C_A	6.95257	-2.55069	1.98536	-1.28475	0.198881	1	0.12275
C1_12890W_A	5.22344	-2.54142	1.90751	-1.33233	0.182753	1	0
CR_02940C_A	0.483435	-2.53561	4.75705	-0.533021	0.594019	1	0
C2_04960C_A	0.483435	-2.53561	4.75705	-0.533021	0.594019	1	0
CR_04970C_A	0.483435	-2.53561	4.75705	-0.533021	0.594019	1	0
C2_10130W_A	0.483435	-2.53561	4.75705	-0.533021	0.594019	1	0
C1_11570W_A	0.483435	-2.53561	4.75705	-0.533021	0.594019	1	0
C4_04560C_A	6.53136	-2.53149	1.76881	-1.43119	0.152377	1	0
C6_02160W_A	3.1628	-2.53091	2.5453	-0.994346	0.320054	1	0
C7_04100C_A	4.11302	-2.52218	2.1125	-1.19393	0.232504	1	0
C5_01260W_A	3.0026	-2.51939	2.75645	-0.914	0.360717	1	0
C3_02750W_A	3.0026	-2.51939	2.75645	-0.914	0.360717	1	0
C3_06240C_A	3.0026	-2.51939	2.75645	-0.914	0.360717	1	0
C2_00290W_A	3.0026	-2.51939	2.75645	-0.914	0.360717	1	0
C1_12730W_A	11.5282	-2.51447	1.38747	-1.81227	0.0699451	0.974921	0.242098
C1_04120C_A	5.12675	-2.51086	1.9212	-1.30692	0.191241	1	0
C2_04790C_A	5.68196	-2.50794	1.83817	-1.36437	0.172451	1	0
C1_12870C_A	7.34759	-2.50791	1.67219	-1.49977	0.133673	1	0.12275
C7_03520W_A	4.57154	-2.5017	2.01788	-1.23977	0.215062	1	0
C6_04260C_A	4.57154	-2.5017	2.01788	-1.23977	0.215062	1	0
CR_07690W_A	2.34657	-2.49678	2.53529	-0.984813	0.324716	1	0
CR_03160W_A	5.22757	-2.4959	2.00611	-1.24415	0.213444	1	0
C1_10470W_A	7.2509	-2.48657	1.6787	-1.48125	0.138541	1	0.242098
C3_01900C_A	5.78278	-2.48508	1.88095	-1.32118	0.18644	1	0
C3_03010C_A	11.734	-2.47986	1.43329	-1.73019	0.0835959	1	0.242098
C6_03480W_A	5.03006	-2.47962	1.93572	-1.28098	0.2002	1	0
CR_08680C_A	12.0897	-2.47188	1.3512	-1.8294	0.0673397	1	0.126307
C1_07030C_A	23.9536	-2.46744	0.934125	-2.64144	0.00825537	0.0875415	2.66788
C3_04030C_A	12.7457	-2.46443	1.33346	-1.84815	0.06458	1	0.123191
C3_02240C_A	40.6436	-2.45908	1.99937	-1.22993	0.218724	0.688485	2.90062
C5_02360C_A	7.35792	-2.45182	1.85733	-1.32008	0.186808	1	0.123191
C5_01020C_A	3.47546	-2.44905	2.79529	-0.876133	0.380958	1	0
C2_08390W_A	24.9674	-2.44818	0.868948	-2.8174	0.00484141	0.0578993	2.66788
C1_13240W_A	14.325	-2.44527	1.36604	-1.79004	0.0734479	1	0.126307
C1_13990W_A	6.79858	-2.44356	1.77109	-1.37969	0.167681	1	0.242098
C5_00860W_A	3.91964	-2.43951	2.16036	-1.12921	0.258808	1	0
C1_02990C_A	65.9557	-2.43781	0.491353	-4.96141	6.99817e-07	2.05206e-05	2.9232
CR_04760C_A	2.5109	-2.43751	2.72757	-0.893656	0.371506	1	0
C2_09360W_A	2.5109	-2.43751	2.72757	-0.893656	0.371506	1	0
C4_03250C_A	7.35585	-2.43712	1.74858	-1.39377	0.163386	1	0.0561166
C1_09430W_A	109.06	-2.43625	0.383979	-6.34476	2.22776e-10	1.1829e-08	2.9232
C1_13400C_A	44.7595	-2.43076	0.624164	-3.89442	9.84359e-05	0.00225423	2.66788
C7_00510W_A	12.4556	-2.42898	1.35209	-1.79646	0.0724206	1	0.126307
C2_09480W_A	4.37817	-2.42871	2.0557	-1.18145	0.237424	1	0
C1_08650C_A	12.7146	-2.42484	1.31437	-1.84487	0.065057	1	0.126307
CR_09020C_A	58.421	-2.42215	0.526989	-4.59621	4.30236e-06	0.000117635	2.95837
C2_05910W_A	30.6872	-2.42071	1.95879	-1.23582	0.216526	0.687226	2.9232
C6_00910C_A	92.2623	-2.41929	0.426556	-5.67168	1.41402e-08	5.84041e-07	2.95837
C4_02480C_A	3.16693	-2.41318	2.28471	-1.05623	0.290862	1	0
CR_05960W_A	3.16693	-2.41318	2.28471	-1.05623	0.290862	1	0
C3_03090W_A	37.8746	-2.40832	0.663483	-3.62981	0.000283625	0.00536976	2.88894
CR_02300C_A	18.8937	-2.40707	1.09773	-2.19278	0.0283233	0.796079	0.242098
C4_03860C_A	7.71769	-2.3967	1.69783	-1.41163	0.158059	1	0.242098
C6_01940W_A	6.21019	-2.39213	1.77717	-1.34603	0.178292	1	0
C1_13740W_A	56.7379	-2.38187	0.533517	-4.46446	8.02698e-06	0.000199777	2.95837
C1_00810W_A	4.74	-2.38151	1.98448	-1.20006	0.230115	1	0
C3_05770C_A	4.74	-2.38151	1.98448	-1.20006	0.230115	1	0
C4_01800W_A	4.74	-2.38151	1.98448	-1.20006	0.230115	1	0
C3_02970C_A	17.1707	-2.3808	1.15616	-2.05923	0.0394725	1	0.0561166
C1_00800C_A	10.3045	-2.36632	1.4971	-1.5806	0.113969	1	0.123191
C4_02800W_A	14.7544	-2.36424	1.26732	-1.86555	0.0621042	1	0.126307
C1_03390W_A	43.1432	-2.36195	0.611141	-3.86482	0.000111169	0.00230257	2.90062
C1_05330C_A	4.08604	-2.35589	2.08857	-1.12799	0.259323	1	0
C4_02580W_A	2.61172	-2.35301	2.43939	-0.964591	0.33475	1	0
C1_06140C_A	4.61014	-2.35069	2.25056	-1.04449	0.296257	1	0
C2_05590C_A	5.65705	-2.34599	1.83034	-1.28172	0.199941	1	0
C4_04140W_A	16.0136	-2.3402	1.23391	-1.89658	0.0578835	1	0.123191
C1_12170C_A	10.0103	-2.33893	1.4774	-1.58314	0.11339	1	0.123191
C3_04330C_A	33.9823	-2.33021	1.84903	-1.26024	0.207584	0.67275	2.95837
C4_05420C_A	8.04635	-2.32795	1.61317	-1.44309	0.148995	1	0.123191
CR_09560C_A	7.88615	-2.3228	1.67627	-1.3857	0.16584	1	0.123191
C6_03910C_A	0.386748	-2.31668	4.87794	-0.47493	0.634837	1	0
C1_06870C_A	0.386748	-2.31668	4.87794	-0.47493	0.634837	1	0
C1_05690C_A	0.386748	-2.31668	4.87794	-0.47493	0.634837	1	0
C4_00290C_A	0.386748	-2.31668	4.87794	-0.47493	0.634837	1	0
C7_00560C_A	0.386748	-2.31668	4.87794	-0.47493	0.634837	1	0
C5_05180W_A	0.386748	-2.31668	4.87794	-0.47493	0.634837	1	0
C1_00100C_A	0.386748	-2.31668	4.87794	-0.47493	0.634837	1	0
C2_06340W_A	0.386748	-2.31668	4.87794	-0.47493	0.634837	1	0
CR_09140C_A	0.386748	-2.31668	4.87794	-0.47493	0.634837	1	0
C6_04320C_A	0.386748	-2.31668	4.87794	-0.47493	0.634837	1	0
C2_09880C_A	0.386748	-2.31668	4.87794	-0.47493	0.634837	1	0
CR_06310W_A	0.386748	-2.31668	4.87794	-0.47493	0.634837	1	0
C2_01450C_A	0.386748	-2.31668	4.87794	-0.47493	0.634837	1	0
CR_04400W_A	0.386748	-2.31668	4.87794	-0.47493	0.634837	1	0
C5_01670W_A	0.386748	-2.31668	4.87794	-0.47493	0.634837	1	0
C1_01180C_A	0.386748	-2.31668	4.87794	-0.47493	0.634837	1	0
C1_07660W_A	0.386748	-2.31668	4.87794	-0.47493	0.634837	1	0
C3_05660C_A	0.386748	-2.31668	4.87794	-0.47493	0.634837	1	0
C5_04010C_A	0.386748	-2.31668	4.87794	-0.47493	0.634837	1	0
C4_04820C_A	0.386748	-2.31668	4.87794	-0.47493	0.634837	1	0
C2_02750C_A	0.386748	-2.31668	4.87794	-0.47493	0.634837	1	0
C7_00460W_A	0.386748	-2.31668	4.87794	-0.47493	0.634837	1	0
C5_05010W_A	0.386748	-2.31668	4.87794	-0.47493	0.634837	1	0
C6_01180C_A	0.386748	-2.31668	4.87794	-0.47493	0.634837	1	0
C3_01270W_A	0.386748	-2.31668	4.87794	-0.47493	0.634837	1	0
CR_06100C_A	0.386748	-2.31668	4.87794	-0.47493	0.634837	1	0
CR_07030C_A	0.386748	-2.31668	4.87794	-0.47493	0.634837	1	0
CR_04270C_A	0.386748	-2.31668	4.87794	-0.47493	0.634837	1	0
C3_02800W_A	0.386748	-2.31668	4.87794	-0.47493	0.634837	1	0
C2_06370C_A	0.386748	-2.31668	4.87794	-0.47493	0.634837	1	0
C7_01690W_A	0.386748	-2.31668	4.87794	-0.47493	0.634837	1	0
CR_01340W_A	0.386748	-2.31668	4.87794	-0.47493	0.634837	1	0
C1_02580W_A	0.386748	-2.31668	4.87794	-0.47493	0.634837	1	0
C6_00630W_A	0.386748	-2.31668	4.87794	-0.47493	0.634837	1	0
CR_03660C_A	0.386748	-2.31668	4.87794	-0.47493	0.634837	1	0
CR_08580C_A	0.386748	-2.31668	4.87794	-0.47493	0.634837	1	0
CR_06220C_A	0.386748	-2.31668	4.87794	-0.47493	0.634837	1	0
C3_00430W_A	0.386748	-2.31668	4.87794	-0.47493	0.634837	1	0
CR_07800W_A	0.386748	-2.31668	4.87794	-0.47493	0.634837	1	0
C2_05390C_A	0.386748	-2.31668	4.87794	-0.47493	0.634837	1	0
C1_10510W_A	0.386748	-2.31668	4.87794	-0.47493	0.634837	1	0
C4_03570W_A	0.386748	-2.31668	4.87794	-0.47493	0.634837	1	0
C4_01160W_A	0.386748	-2.31668	4.87794	-0.47493	0.634837	1	0
C5_00850C_A	0.386748	-2.31668	4.87794	-0.47493	0.634837	1	0
C2_07360W_A	3.98935	-2.31508	2.10706	-1.09872	0.271889	1	0
C1_14390W_A	4.54663	-2.31167	2.02061	-1.14404	0.252606	1	0
C2_03150C_A	6.21639	-2.30993	1.80289	-1.28124	0.200109	1	0
C6_00210W_A	7.68864	-2.30963	1.63861	-1.40951	0.158685	1	0.126307
C7_04180W_A	8.50694	-2.30025	1.57131	-1.4639	0.143221	1	0.0561166
C2_05950C_A	5.1039	-2.29885	1.94643	-1.18106	0.237578	1	0
C4_06140C_A	7.39445	-2.29194	1.65862	-1.38183	0.167023	1	0.0561166
C7_03090C_A	4.54869	-2.28391	2.08557	-1.09511	0.273471	1	0
CR_06480C_A	4.54869	-2.28391	2.08557	-1.09511	0.273471	1	0
C4_05760W_A	17.935	-2.28332	1.10336	-2.06943	0.0385057	1	0.0561166
C2_07790C_A	28.3965	-2.28218	0.775638	-2.94233	0.00325755	0.0398129	2.90062
C4_05620C_A	4.44994	-2.27529	2.04	-1.11534	0.264706	1	0
CR_07310W_A	7.13757	-2.27406	1.78775	-1.27202	0.203364	1	0.126307
C4_04650W_A	3.8968	-2.26767	2.55987	-0.885854	0.375696	1	0
C5_00870C_A	9.13185	-2.2621	1.54115	-1.46781	0.142157	1	0.242098
C5_03430W_A	11.3589	-2.25966	1.38424	-1.63242	0.102591	1	0.12275
C3_00370C_A	3.5329	-2.25934	2.28478	-0.988864	0.32273	1	0
C3_04070C_A	11.9162	-2.25607	1.35329	-1.66709	0.0954958	1	0.242098
CR_06020W_A	44.718	-2.24876	0.681521	-3.29963	0.00096814	0.0150933	2.90062
C5_04340W_A	9.95221	-2.24297	1.49271	-1.50262	0.132938	1	0.242098
C2_09510C_A	4.35325	-2.23788	2.06043	-1.08612	0.277424	1	0
CR_04020C_A	15.5291	-2.23314	1.27805	-1.74731	0.0805844	1	0.242098
C1_05350W_A	5.72882	-2.22501	1.81423	-1.22642	0.220041	1	0
C1_01240W_A	13.1992	-2.21396	1.29403	-1.7109	0.0871002	1	0.126307
C2_07980W_A	8.31976	-2.21196	1.62636	-1.36007	0.173808	1	0.123191
C4_06430C_A	8.31976	-2.21196	1.62636	-1.36007	0.173808	1	0.0561166
CR_07200W_A	1.76232	-2.20838	3.03464	-0.727725	0.466782	1	0
C7_00280W_A	1.76232	-2.20838	3.03464	-0.727725	0.466782	1	0
C2_02940W_A	2.5171	-2.20555	2.57714	-0.855816	0.392099	1	0
C7_03350C_A	9.95634	-2.20484	1.46887	-1.50104	0.133344	1	0.123191
C1_02840W_A	5.53338	-2.20251	1.83927	-1.19749	0.231114	1	0
C7_02350C_A	12.905	-2.2013	1.30169	-1.69111	0.0908148	1	0.126307
C3_05250C_A	9.04137	-2.18673	1.53665	-1.42305	0.154722	1	0.126307
C1_02870W_A	2.12415	-2.17642	2.86421	-0.75987	0.447333	1	0
C1_13060C_A	9.10694	-2.1763	1.53995	-1.41323	0.157587	1	0.126307
C2_09990C_A	7.66786	-2.17496	1.70577	-1.27506	0.202288	1	0.0561166
C5_03330C_A	19.7358	-2.16542	1.1379	-1.90299	0.0570414	1	0.123191
C1_04160C_A	5.6342	-2.16542	1.84519	-1.17355	0.240577	1	0
CR_00090C_A	12.1564	-2.16327	1.33915	-1.61541	0.106222	1	0.242098
C2_03600W_A	11.4389	-2.16219	1.43052	-1.51148	0.130667	1	0.123191
C1_13950C_A	1.30379	-2.15655	3.32934	-0.647742	0.517152	1	0
C4_05220C_A	8.94675	-2.15525	1.56398	-1.37806	0.168185	1	0.12275
C4_06480C_A	152.589	-2.15216	0.385256	-5.58631	2.3195e-08	9.38079e-07	2.95837
CR_02880W_A	6.35581	-2.14964	1.74204	-1.23398	0.217211	1	0
CR_03070W_A	4.32421	-2.14185	2.04112	-1.04935	0.294019	1	0
C1_08310W_A	37.3997	-2.13625	0.638615	-3.34513	0.00082245	0.013305	2.95837
C2_06530W_A	4.98024	-2.13027	1.92271	-1.10795	0.267883	1	0
C4_04710W_A	13.9988	-2.12827	1.2762	-1.66766	0.0953838	1	0.0561166
C1_11910W_A	1.66563	-2.11918	3.08673	-0.686546	0.492369	1	0
C3_05630W_A	5.53958	-2.1179	1.92362	-1.101	0.270897	1	0
C2_00500W_A	33.6884	-2.11635	0.71136	-2.97507	0.0029292	0.0369401	2.90062
CR_07920W_A	42.3455	-2.11525	2.04296	-1.03538	0.30049	0.772872	2.88894
C1_05870W_A	2.78225	-2.11108	2.44436	-0.863653	0.387779	1	0
C1_07960W_A	3.14615	-2.10971	2.71245	-0.777787	0.436694	1	0
CR_00170W_A	9.57373	-2.10804	1.50926	-1.39674	0.162492	1	0.12275
C6_03410C_A	8.72019	-2.1047	1.56164	-1.34775	0.177737	1	0.0561166
CR_00290W_A	12.1315	-2.10038	1.34	-1.56746	0.117008	1	0.126307
C3_03290C_A	8.65668	-2.10023	1.59189	-1.31933	0.187058	1	0.123191
C1_02090C_A	6.82259	-2.09981	1.87323	-1.12096	0.262305	1	0.242098
C1_08020W_A	4.88355	-2.09653	1.93914	-1.08117	0.279623	1	0
CR_09610C_A	27.602	-2.09558	1.86017	-1.12655	0.259931	0.73842	2.9232
C2_01030W_A	5.60516	-2.09228	1.82546	-1.14617	0.251726	1	0
C5_05260W_A	3.60467	-2.09099	2.26793	-0.921978	0.35654	1	0
C5_04840C_A	3.60467	-2.09099	2.26793	-0.921978	0.35654	1	0
C1_09340C_A	74.7221	-2.09056	2.33723	-0.89446	0.371076	0.811383	2.9232
C3_02580C_A	3.11297	-2.08596	2.54809	-0.818637	0.412993	1	0
C5_02920W_A	13.9391	-2.08006	1.19111	-1.74633	0.0807545	1	0.12275
C7_00970C_A	27.7188	-2.07994	0.798529	-2.60471	0.00919524	0.0942577	2.66788
C1_10000C_A	57.6181	-2.07102	0.565606	-3.66159	0.000250653	0.00488509	2.88894
C5_05360C_A	8.52682	-2.06726	1.57276	-1.31441	0.188708	1	0.12275
C1_02270C_A	2.22497	-2.06117	2.58206	-0.798264	0.424717	1	0
C2_02880C_A	34.2222	-2.05576	0.669096	-3.07244	0.00212318	0.0286228	2.95837
C3_07330W_A	8.36456	-2.05524	1.59201	-1.29098	0.196712	1	0.12275
C1_06670W_A	10.104	-2.0524	1.46793	-1.39816	0.162065	1	0.123191
C1_03840W_A	0.290061	-2.05145	4.88281	-0.420138	0.674385	1	0
C4_07000W_A	0.290061	-2.05145	4.88281	-0.420138	0.674385	1	0
C5_04940W_A	0.290061	-2.05145	4.88281	-0.420138	0.674385	1	0
CR_06630W_A	0.290061	-2.05145	4.88281	-0.420138	0.674385	1	0
C6_00020W_A	0.290061	-2.05145	4.88281	-0.420138	0.674385	1	0
C6_02100W_A	0.290061	-2.05145	4.88281	-0.420138	0.674385	1	0
C2_02910W_A	0.290061	-2.05145	4.88281	-0.420138	0.674385	1	0
CR_03450W_A	0.290061	-2.05145	4.88281	-0.420138	0.674385	1	0
CR_03010C_A	0.290061	-2.05145	4.88281	-0.420138	0.674385	1	0
C2_04520C_A	0.290061	-2.05145	4.88281	-0.420138	0.674385	1	0
C4_03310C_A	0.290061	-2.05145	4.88281	-0.420138	0.674385	1	0
C4_05200C_A	0.290061	-2.05145	4.88281	-0.420138	0.674385	1	0
C7_01880C_A	0.290061	-2.05145	4.88281	-0.420138	0.674385	1	0
CR_02780W_A	0.290061	-2.05145	4.88281	-0.420138	0.674385	1	0
C2_07570W_A	0.290061	-2.05145	4.88281	-0.420138	0.674385	1	0
CR_08510W_A	0.290061	-2.05145	4.88281	-0.420138	0.674385	1	0
C4_05360C_A	0.290061	-2.05145	4.88281	-0.420138	0.674385	1	0
C1_03950C_A	0.290061	-2.05145	4.88281	-0.420138	0.674385	1	0
CR_08290W_A	26.3759	-2.04777	0.91853	-2.22941	0.025787	0.199838	2.66788
C3_06630W_A	5.82875	-2.04222	4.58462	-0.445451	0.655994	1	0
C6_03330C_A	10.5667	-2.03974	1.47782	-1.38024	0.167514	1	0.12275
C7_03200C_A	14.1444	-2.03942	1.29035	-1.58052	0.113989	1	0.126307
C6_00290W_A	3.37812	-2.03855	2.48426	-0.820586	0.411882	1	0
C2_10180W_A	1.20711	-2.03521	3.40205	-0.598232	0.549685	1	0
C1_02300W_A	1.20711	-2.03521	3.40205	-0.598232	0.549685	1	0
C2_05840W_A	1.20711	-2.03521	3.40205	-0.598232	0.549685	1	0
C4_05870C_A	1.20711	-2.03521	3.40205	-0.598232	0.549685	1	0
CR_00150C_A	13.2888	-2.03141	1.28249	-1.58395	0.113204	1	0.242098
C2_03000C_A	4.82611	-2.03063	1.89076	-1.07398	0.282833	1	0
C1_13570W_A	16.1449	-2.0297	1.17391	-1.72901	0.0838071	1	0.12275
C1_02890C_A	8.33345	-2.02863	1.58413	-1.2806	0.200335	1	0.12275
C2_04440W_A	2.29261	-2.028	2.79525	-0.725515	0.468136	1	0
C1_05930C_A	7.51309	-2.02436	1.6404	-1.23407	0.217177	1	0.0561166
C2_05650W_A	31.6331	-2.02367	2.00542	-1.0091	0.312927	0.772872	2.95837
CR_10060W_A	36.864	-2.01925	0.644329	-3.13388	0.00172509	0.026337	2.66788
C2_04540C_A	7.81141	-2.01586	1.69022	-1.19266	0.233002	1	0.0561166
C1_10240C_A	24.3909	-2.01214	0.809775	-2.48481	0.0129622	0.112681	2.9232
C2_08110W_A	7.35289	-2.01027	1.76147	-1.14125	0.253767	1	0.0561166
C1_12540W_A	5.05201	-2.00852	1.90441	-1.05467	0.291576	1	0
C6_01370W_A	22.546	-1.99387	0.860415	-2.31734	0.0204853	0.157211	2.9232
C7_03260C_A	12.8406	-1.99069	1.39056	-1.43157	0.152267	1	0.0561166
C2_05550W_A	25.937	-1.99051	0.775519	-2.56668	0.0102676	0.0964098	2.88894
C2_02730W_A	25.936	-1.9899	0.932118	-2.13482	0.0327761	0.226903	2.90062
C5_03260C_A	8.14007	-1.98876	1.59577	-1.24627	0.212666	1	0.242098
C2_09310C_A	3.77313	-1.98832	2.21598	-0.897264	0.369578	1	0
C5_02740W_A	8.43633	-1.98641	1.58514	-1.25315	0.210153	1	0.126307
C3_03340C_A	5.77568	-1.98418	1.79932	-1.10274	0.27014	1	0
C5_00290W_A	4.04035	-1.98322	2.52279	-0.78612	0.431797	1	0
C4_02680C_A	2.12828	-1.97672	2.62686	-0.752503	0.451749	1	0
C3_06170C_A	2.12828	-1.97672	2.62686	-0.752503	0.451749	1	0
C2_06020W_A	6.23627	-1.97304	1.75998	-1.12106	0.262263	1	0
C3_02340W_A	2.55776	-1.97228	2.70262	-0.729766	0.465533	1	0
C2_04380C_A	24.3316	-1.97189	0.859104	-2.29529	0.0217168	0.163404	2.95837
C1_09210C_A	16.1876	-1.96941	1.16549	-1.68977	0.091071	1	0.12275
C6_03310W_A	16.2552	-1.95961	1.17143	-1.67284	0.0943578	1	0.0561166
C4_05980C_A	8.34171	-1.95457	1.62685	-1.20145	0.229578	1	0.12275
C5_00950C_A	15.0095	-1.95349	1.22615	-1.59319	0.111119	1	0.12275
CR_07180W_A	38.0187	-1.95233	0.631629	-3.09095	0.00199518	0.0279315	2.88894
C3_01520C_A	4.4968	-1.95202	2.01313	-0.969645	0.332223	1	0
C6_00540W_A	12.9082	-1.95115	1.3277	-1.46957	0.141679	1	0.242098
C7_01460C_A	59.5267	-1.95101	0.499329	-3.90726	9.33478e-05	0.00218419	2.66788
C1_05500W_A	1.83409	-1.94167	2.99219	-0.648914	0.516394	1	0
CR_02590C_A	8.24502	-1.93477	1.6384	-1.18089	0.237646	1	0.0561166
C1_03140W_A	6.60224	-1.93135	1.80803	-1.0682	0.285429	1	0
C4_01970W_A	9.22971	-1.93097	1.51218	-1.27694	0.201622	1	0.242098
C2_08510W_A	4.49887	-1.92817	2.10372	-0.916553	0.359377	1	0
C1_13520C_A	5.58231	-1.92408	1.82192	-1.05607	0.290934	1	0
C1_01830C_A	38.0311	-1.9168	0.659656	-2.90576	0.00366359	0.0472241	2.66788
CR_09920W_A	12.1808	-1.91332	4.38629	-0.436205	0.662688	1	0.12275
C4_01960C_A	16.0672	-1.90906	1.06424	-1.79382	0.0728416	1	0.0561166
CR_01090W_A	10.416	-1.9052	1.44576	-1.31778	0.187577	1	0.12275
C7_03340C_A	1.11042	-1.90269	3.48074	-0.546635	0.58463	1	0
C3_03060W_A	5.12379	-1.89746	1.8891	-1.00442	0.315174	1	0
C2_08730W_A	31.5705	-1.89685	0.779	-2.43498	0.0148924	0.123452	2.9232
C2_07030C_A	3.57976	-1.89628	2.29482	-0.82633	0.408617	1	0
CR_06040W_A	55.8886	-1.89397	0.512682	-3.69424	0.000220544	0.00433287	2.9232
C3_04690C_A	3.08806	-1.89371	2.55076	-0.74241	0.457839	1	0
C3_06800C_A	8.41349	-1.88914	1.62065	-1.16567	0.243749	1	0.123191
CR_07810W_A	21.8529	-1.88867	0.953324	-1.98114	0.0475751	0.294112	2.95837
CR_03200C_A	6.76864	-1.88579	1.72601	-1.09257	0.274584	1	0
C1_12480W_A	2.09924	-1.88537	2.86899	-0.657156	0.51108	1	0
C1_13560W_A	7.65664	-1.88308	1.6264	-1.15783	0.246935	1	0.126307
C5_03920C_A	4.56651	-1.87385	1.97033	-0.951032	0.341588	1	0
C3_04530C_A	4.66527	-1.86745	1.97386	-0.946086	0.344105	1	0
CR_00210W_A	4.66527	-1.86745	1.97386	-0.946086	0.344105	1	0
C6_02560W_A	17.8876	-1.8662	1.15607	-1.61426	0.106472	1	0.126307
C4_06780C_A	6.31011	-1.86266	1.78683	-1.04244	0.297206	1	0
C3_02590W_A	37.4592	-1.86254	2.0602	-0.904056	0.365966	0.833713	2.66788
C1_03770W_A	13.4157	-1.86037	1.31994	-1.40944	0.158706	1	0.123191
C2_00690W_A	8.11929	-1.85705	1.59432	-1.16479	0.244103	1	0.0561166
CR_09720W_A	1.7374	-1.85355	3.0412	-0.609481	0.542206	1	0
C2_06080C_A	19.9508	-1.85111	0.993816	-1.86263	0.062515	0.959164	0.242098
C7_01730C_A	3.71504	-1.85049	2.39092	-0.773965	0.438951	1	0
C3_07820W_A	8.94378	-1.84418	1.56736	-1.17662	0.239348	1	0.0561166
C5_01740C_A	20.6503	-1.84247	1.02855	-1.79133	0.0732405	1	0.12275
C1_04780C_A	27.0076	-1.84027	1.91808	-0.959434	0.33734	0.793782	2.95837
C4_05960W_A	21.1482	-1.83752	1.04937	-1.75107	0.0799335	1	0.126307
C1_00460W_A	20.3849	-1.83746	0.934297	-1.96668	0.0492206	1	0.123191
C5_03240W_A	22.4195	-1.83444	0.930003	-1.97251	0.0485509	0.300672	2.88894
C2_06620W_A	4.20674	-1.83222	2.08032	-0.880738	0.37846	1	0
C1_12070C_A	6.01592	-1.83111	1.76742	-1.03604	0.300184	1	0
C6_02570C_A	13.053	-1.82446	1.29501	-1.40884	0.158882	1	0.0561166
C7_01910C_A	19.6011	-1.82094	0.936051	-1.94534	0.0517336	0.92195	0.242098
C6_03230W_A	142.159	-1.81501	0.330834	-5.48616	4.10757e-08	1.58233e-06	2.9232
C5_04320C_A	16.744	-1.81244	1.15363	-1.57107	0.116167	1	0.126307
C1_04410C_A	17.8295	-1.81086	1.11249	-1.62776	0.103575	1	0.126307
C4_05740C_A	66.0604	-1.8101	0.462359	-3.91492	9.04352e-05	0.00197413	2.9232
C1_01750W_A	4.27439	-1.80945	2.02843	-0.892045	0.372369	1	0
C2_02670C_A	3.38638	-1.80936	2.42832	-0.745106	0.456208	1	0
C1_13780W_A	136.59	-1.80761	0.359385	-5.02974	4.91143e-07	1.51942e-05	2.90062
C5_02050W_A	37.053	-1.80663	0.647278	-2.79111	0.00525273	0.0578993	2.90062
CR_09640C_A	18.7548	-1.80486	1.11797	-1.61441	0.106438	1	0.126307
C3_03690W_A	3.2897	-1.80458	2.67384	-0.674899	0.49974	1	0
CR_09060W_A	3.2897	-1.80458	2.67384	-0.674899	0.49974	1	0
C2_05880W_A	0.847337	-1.80436	3.5447	-0.50903	0.610731	1	0
CR_10820W_A	5.91923	-1.8019	1.7776	-1.01367	0.310738	1	0
C7_01940C_A	56.0129	-1.79815	0.606734	-2.96366	0.00304008	0.0374385	2.9232
CR_04560C_A	5.19556	-1.79531	1.87515	-0.957421	0.338355	1	0
C4_03690C_A	5.19556	-1.79531	1.87515	-0.957421	0.338355	1	0
C2_00720C_A	11.748	-1.79525	1.41847	-1.26563	0.205647	1	0.123191
C1_03820W_A	45.476	-1.79436	0.590924	-3.03654	0.00239313	0.033892	2.66788
C7_02340C_A	3.74822	-1.79327	2.22678	-0.805321	0.420634	1	0
C4_05060W_A	12.1119	-1.79284	1.42691	-1.25645	0.208953	1	0.123191
C7_03500W_A	4.83373	-1.79273	1.93896	-0.924583	0.355183	1	0
C2_08200W_A	4.47189	-1.79077	2.0144	-0.888986	0.374011	1	0
C2_04860W_A	7.56822	-1.79067	1.73986	-1.0292	0.303384	1	0.123191
C1_04500W_A	97.615	-1.79025	0.439593	-4.07252	4.65079e-05	0.00107495	2.9232
C1_08560W_A	57.8088	-1.78965	0.515404	-3.47231	0.000515991	0.00905118	2.9232
CR_05180C_A	9.37739	-1.78797	1.52898	-1.16939	0.242247	1	0.126307
C1_00860W_A	9.86755	-1.78756	1.39758	-1.27904	0.200884	1	0.126307
C1_13010W_A	6.54622	-1.78255	1.71316	-1.0405	0.298107	1	0
C4_00230W_A	11.1886	-1.78034	1.40911	-1.26345	0.206427	1	0.12275
C3_03800W_A	9.37946	-1.77982	1.56493	-1.13732	0.255405	1	0.126307
C3_05010C_A	14.151	-1.77921	1.25163	-1.42152	0.155167	1	0.12275
C4_00840W_A	20.563	-1.77921	0.907924	-1.95964	0.0500377	1	0.0561166
C4_06280C_A	1.47432	-1.77811	2.94289	-0.604207	0.545706	1	0
C1_03200C_A	6.18438	-1.77745	1.74829	-1.01668	0.309306	1	0
C1_13310W_A	5.36196	-1.77363	1.84314	-0.962287	0.335905	1	0
C4_02590C_A	9.64254	-1.77131	1.50677	-1.17556	0.23977	1	0.12275
C6_04420W_A	38.6236	-1.76412	0.617887	-2.85508	0.00430257	0.050313	2.88894
C4_01430C_A	10.7957	-1.76264	1.41371	-1.24682	0.212464	1	0.0561166
C4_06050W_A	5.09888	-1.76111	1.89039	-0.931612	0.351537	1	0
C1_08770W_A	15.175	-1.76107	1.22383	-1.43898	0.150157	1	0.0561166
CR_00670C_A	1.64072	-1.75937	3.09464	-0.568521	0.569681	1	0
C4_07050W_A	1.64072	-1.75937	3.09464	-0.568521	0.569681	1	0
C1_07950C_A	1.64072	-1.75937	3.09464	-0.568521	0.569681	1	0
C2_01010W_A	6.64704	-1.7565	1.74222	-1.0082	0.313361	1	0
C3_07980C_A	1.01373	-1.75641	3.56673	-0.492441	0.622407	1	0
C2_00150W_A	4.73704	-1.7559	1.95745	-0.897034	0.369701	1	0
C7_01480W_A	6.54828	-1.75298	1.72233	-1.0178	0.308774	1	0
C6_02410W_A	9.67907	-1.75055	1.52139	-1.15063	0.249886	1	0.126307
C5_03690W_A	2.53285	-1.7505	2.70687	-0.646689	0.517834	1	0
C1_05180C_A	2.53285	-1.7505	2.70687	-0.646689	0.517834	1	0
C1_06500W_A	8.09851	-1.74578	1.6641	-1.04909	0.294138	1	0.242098
C1_11000C_A	5.72586	-1.74155	1.79967	-0.967704	0.333192	1	0
CR_08900C_A	11.7251	-1.7415	1.47124	-1.1837	0.236533	1	0.242098
C2_01090C_A	10.1728	-1.74129	1.46558	-1.18812	0.234786	1	0.123191
C6_03590C_A	5.82461	-1.74027	1.81132	-0.960776	0.336665	1	0
C2_04450W_A	8.06534	-1.73954	1.5956	-1.09021	0.275619	1	0.126307
C1_12960C_A	250.375	-1.7363	0.248814	-6.97831	2.98744e-12	2.04787e-10	2.88894
CR_07580C_A	14.0949	-1.73612	1.30186	-1.33357	0.182346	1	0.242098
C2_01870C_A	9.08733	-1.73263	1.55678	-1.11296	0.265726	1	0.123191
C5_04080C_A	10.1749	-1.73073	1.49013	-1.16146	0.245455	1	0.242098
C5_04120C_A	7.34166	-1.72621	1.64634	-1.04851	0.294403	1	0.12275
C1_10830W_A	5.00219	-1.72606	1.90662	-0.905296	0.365309	1	0
C6_03210C_A	3.19094	-1.72524	2.30892	-0.747207	0.454939	1	0
C3_05120C_A	9.3193	-1.72313	1.51778	-1.1353	0.256251	1	0.242098
C3_01660W_A	4.1839	-1.72217	2.47593	-0.695566	0.486701	1	0
C3_00950C_A	4.64035	-1.718	1.97694	-0.869019	0.384837	1	0
C4_02760C_A	5.53042	-1.71736	1.82063	-0.943278	0.345539	1	0
C2_03170W_A	9.35248	-1.71736	1.53297	-1.12028	0.262596	1	0.126307
CR_03930C_A	14.5908	-1.71076	1.23192	-1.3887	0.164925	1	0.126307
C1_06530C_A	17.1511	-1.70873	1.01161	-1.68912	0.0911963	1	0.126307
C3_05950W_A	2.17101	-1.70262	2.8367	-0.600214	0.548363	1	0
C1_06810W_A	20.0471	-1.70233	0.960252	-1.77279	0.0762633	1	0.126307
C5_02110W_A	0.193374	-1.69787	4.89078	-0.347157	0.728474	1	0
C1_12990W_A	0.193374	-1.69787	4.89078	-0.347157	0.728474	1	0
C6_03060W_A	0.193374	-1.69787	4.89078	-0.347157	0.728474	1	0
C1_14020W_A	0.193374	-1.69787	4.89078	-0.347157	0.728474	1	0
C4_01110W_A	0.193374	-1.69787	4.89078	-0.347157	0.728474	1	0
C7_04250W_A	0.193374	-1.69787	4.89078	-0.347157	0.728474	1	0
C1_11780W_A	0.193374	-1.69787	4.89078	-0.347157	0.728474	1	0
C2_07240C_A	0.193374	-1.69787	4.89078	-0.347157	0.728474	1	0
C2_06060C_A	0.193374	-1.69787	4.89078	-0.347157	0.728474	1	0
C1_13600W_A	0.193374	-1.69787	4.89078	-0.347157	0.728474	1	0
C3_01440C_A	0.193374	-1.69787	4.89078	-0.347157	0.728474	1	0
C7_01050W_A	0.193374	-1.69787	4.89078	-0.347157	0.728474	1	0
C1_14630C_A	0.193374	-1.69787	4.89078	-0.347157	0.728474	1	0
C6_01060C_A	0.193374	-1.69787	4.89078	-0.347157	0.728474	1	0
C4_00430W_A	0.193374	-1.69787	4.89078	-0.347157	0.728474	1	0
C5_01160C_A	0.193374	-1.69787	4.89078	-0.347157	0.728474	1	0
C3_05600W_A	0.193374	-1.69787	4.89078	-0.347157	0.728474	1	0
C3_02660W_A	0.193374	-1.69787	4.89078	-0.347157	0.728474	1	0
C5_02080C_A	0.193374	-1.69787	4.89078	-0.347157	0.728474	1	0
C5_00780C_A	6.84855	-1.69473	1.582	-1.07126	0.284054	1	0.123191
C5_02580W_A	12.4198	-1.69442	1.34748	-1.25747	0.208583	1	0.123191
C1_07450W_A	1.11249	-1.69404	3.22348	-0.525531	0.599214	1	0
C4_06540W_A	3.45609	-1.68756	2.2222	-0.759407	0.447609	1	0
C1_14480W_A	1.83822	-1.68643	2.80728	-0.600737	0.548015	1	0
C4_05230C_A	3.69013	-1.68527	2.38589	-0.70635	0.479971	1	0
C1_06640C_A	6.62006	-1.67996	1.71447	-0.979869	0.327151	1	0
C1_14000C_A	24.6871	-1.67776	2.00684	-0.836022	0.403142	0.83431	2.9232
C6_00830C_A	34.1387	-1.67538	2.06211	-0.812455	0.41653	0.842003	2.95837
C2_02420C_A	4.31711	-1.67357	2.26086	-0.740238	0.459156	1	0
C6_01790C_A	5.93292	-1.67208	2.03761	-0.820607	0.41187	1	0
C2_10120W_A	4.08308	-1.6707	2.05934	-0.81128	0.417205	1	0
C5_03370C_A	4.18183	-1.66701	2.08574	-0.799243	0.42415	1	0
C6_03220W_A	4.18183	-1.66701	2.08574	-0.799243	0.42415	1	0
CR_02960W_A	3.36147	-1.66664	2.65101	-0.62868	0.529558	1	0
C4_00050W_A	15.2254	-1.66406	2.77047	-0.600643	0.548078	1	0.123191
C3_07370W_A	7.41344	-1.66381	1.64004	-1.01449	0.310348	1	0.123191
C1_06660W_A	23.1869	-1.66197	0.853963	-1.94618	0.051633	0.311165	2.9232
C4_05800C_A	2.5721	-1.66009	2.62153	-0.633253	0.526568	1	0
CR_05140W_A	1.54403	-1.65822	3.15311	-0.525898	0.598959	1	0
CR_00560W_A	14.8204	-1.65794	1.13887	-1.45578	0.145453	1	0.123191
C3_00910W_A	6.42462	-1.65516	1.72235	-0.960994	0.336555	1	0
C2_07830W_A	32.3723	-1.65386	0.748455	-2.2097	0.027126	0.195504	2.90062
C3_04150W_A	3.72124	-1.65366	2.14562	-0.770714	0.440876	1	0
CR_10040W_A	7.67859	-1.65101	1.62075	-1.01867	0.308359	1	0.123191
C2_05970C_A	3.26065	-1.64912	2.2452	-0.734508	0.462639	1	0
C1_12510W_A	53.5053	-1.64765	0.607039	-2.71424	0.00664281	0.0744773	2.66788
C5_00350C_A	17.0267	-1.64702	1.08565	-1.51709	0.129244	1	0.123191
C5_04530W_A	10.4931	-1.64645	1.72941	-0.952029	0.341082	1	0.123191
C3_06230W_A	13.6468	-1.6459	1.27051	-1.29546	0.195161	1	0.242098
C3_06600C_A	5.4358	-1.64544	1.8367	-0.89587	0.370322	1	0
C1_00550W_A	2.63367	-1.62999	2.43091	-0.670527	0.502522	1	0
C3_06970W_A	10.0898	-1.62759	1.47375	-1.10439	0.269425	1	0.0561166
CR_02030C_A	5.7997	-1.62665	1.81567	-0.895892	0.37031	1	0
C2_06490W_A	12.9251	-1.62557	1.31894	-1.23248	0.217769	1	0.0561166
C1_09160W_A	8.4996	-1.62551	1.52788	-1.0639	0.287375	1	0.242098
CR_04390C_A	37.7593	-1.62393	0.650435	-2.49668	0.012536	0.110457	2.95837
CR_01430W_A	7.88023	-1.62332	1.70395	-0.952684	0.34075	1	0.0561166
C5_04550W_A	16.6194	-1.6213	1.16471	-1.39202	0.163915	1	0.12275
C1_07800W_A	3.72331	-1.61129	2.24499	-0.717727	0.472925	1	0
CR_02990C_A	58.1944	-1.61082	0.491125	-3.27985	0.00103863	0.0158824	2.88894
C2_03250W_A	54.829	-1.60927	0.511024	-3.14911	0.00163769	0.0234965	2.90062
C1_05600W_A	15.6851	-1.60683	1.06582	-1.5076	0.131656	1	0.126307
CR_03280W_A	206.817	-1.6042	0.271154	-5.9162	3.29463e-09	1.55995e-07	2.95837
C5_00820W_A	5.50551	-1.60287	1.82073	-0.880344	0.378673	1	0
C6_02300C_A	4.25154	-1.60242	2.02243	-0.792322	0.428173	1	0
CR_04870C_A	44.0245	-1.60236	0.575557	-2.78402	0.00536897	0.0587301	2.90062
C3_06690C_A	6.23125	-1.59827	1.74067	-0.918193	0.358518	1	0
C2_09860C_A	4.35029	-1.59737	2.04281	-0.781947	0.434246	1	0
C7_02180C_A	9.73007	-1.5973	1.4807	-1.07875	0.280699	1	0.123191
C1_06650W_A	13.7227	-1.59361	1.29079	-1.2346	0.21698	1	0.126307
CR_01030W_A	9.03751	-1.59138	1.56685	-1.01566	0.309794	1	0.242098
CR_02460W_A	10.1616	-1.58535	1.46954	-1.07881	0.280672	1	0.242098
C3_07380W_A	14.6148	-1.58489	1.244	-1.27403	0.202652	1	0.126307
CR_10070C_A	54.646	-1.57607	0.643943	-2.44753	0.0143838	0.121704	2.90062
CR_10020C_A	3.76191	-1.57355	2.36532	-0.665261	0.505884	1	0
C2_00660C_A	72.745	-1.57355	0.485598	-3.24044	0.00119347	0.0177667	2.90062
CR_09230C_A	11.4066	-1.56813	1.24827	-1.25624	0.209028	1	0.12275
C4_06100W_A	22.0751	-1.56766	1.00213	-1.56433	0.117741	0.518041	2.90062
C3_03320W_A	6.30095	-1.5645	1.73814	-0.900098	0.368068	1	0
C3_04550C_A	4.65404	-1.56252	2.1988	-0.710627	0.477315	1	0
C2_08420W_A	8.57899	-1.56244	1.61664	-0.96647	0.333809	1	0.123191
C1_06380C_A	1.18219	-1.56068	3.41393	-0.45715	0.647563	1	0
C3_04200W_A	1.18219	-1.56068	3.41393	-0.45715	0.647563	1	0
C2_04080W_A	48.0375	-1.5604	0.544664	-2.86489	0.00417153	0.0487828	2.9232
C3_07340W_A	16.997	-1.55842	1.14521	-1.36081	0.173573	1	0.123191
C3_03190C_A	4.88059	-1.5576	1.92806	-0.807855	0.419174	1	0
C1_01010W_A	6.49846	-1.5552	1.72776	-0.900123	0.368055	1	0
C5_03160W_A	20.8064	-1.55393	0.878259	-1.76933	0.0768393	1	0.0561166
C1_09970C_A	5.77272	-1.54991	1.7915	-0.865145	0.386959	1	0
C2_01760C_A	1.44734	-1.54904	3.21571	-0.48171	0.630012	1	0
CR_07160C_A	1.44734	-1.54904	3.21571	-0.48171	0.630012	1	0
C1_03920C_A	1.44734	-1.54904	3.21571	-0.48171	0.630012	1	0
C1_07830C_A	1.44734	-1.54904	3.21571	-0.48171	0.630012	1	0
CR_08940W_A	1.44734	-1.54904	3.21571	-0.48171	0.630012	1	0
C5_00980W_A	15.7906	-1.54901	1.11089	-1.39439	0.163201	1	0.242098
C2_09410W_A	8.50219	-1.54851	1.59405	-0.971434	0.331332	1	0.123191
C7_01200C_A	6.66486	-1.54794	1.69904	-0.911065	0.362261	1	0
C5_05460C_A	5.14574	-1.54198	1.8805	-0.819985	0.412225	1	0
C6_03580W_A	8.01964	-1.53568	1.60421	-0.957281	0.338425	1	0.126307
C1_03800W_A	3.06728	-1.53389	2.29468	-0.668455	0.503843	1	0
C5_00450C_A	20.8003	-1.53344	1.06664	-1.43763	0.150539	1	0.0561166
C2_00820W_A	3.89177	-1.53329	2.18092	-0.703045	0.482028	1	0
CR_01010W_A	3.89177	-1.53329	2.18092	-0.703045	0.482028	1	0
CR_09550C_A	26.3792	-1.53229	1.9708	-0.777496	0.436866	0.854055	2.95837
C2_05870W_A	3.79302	-1.53065	2.12367	-0.720758	0.471059	1	0
CR_08340W_A	12.2483	-1.52959	1.36519	-1.12042	0.262533	1	0.12275
C1_04070C_A	5.41089	-1.52886	1.83939	-0.831181	0.405872	1	0
CR_05130C_A	16.9203	-1.52264	1.06342	-1.43183	0.152191	1	0.126307
C7_04020C_A	62.2835	-1.52211	0.50687	-3.00295	0.00267375	0.0368951	2.66788
C7_01180W_A	6.56817	-1.5203	1.7075	-0.890365	0.37327	1	0
C5_05440C_A	56.3462	-1.51674	0.50195	-3.0217	0.00251359	0.0332392	2.90062
C2_03540W_A	12.5176	-1.51623	1.4142	-1.07215	0.283652	1	0.126307
C5_03550W_A	36.0558	-1.51484	0.678976	-2.23107	0.0256764	0.186902	2.90062
C5_01390C_A	3.03823	-1.51449	2.54112	-0.595992	0.55118	1	0
C3_01550C_A	297.981	-1.51448	0.243181	-6.22781	4.72996e-10	2.67946e-08	2.66788
C7_03050W_A	19.7922	-1.51407	0.953801	-1.58741	0.11242	1	0.12275
C3_05090C_A	3.93037	-1.51376	2.32802	-0.650236	0.51554	1	0
C4_06000W_A	11.6758	-1.51343	1.26073	-1.20044	0.22997	1	0.242098
C2_10840W_A	8.88273	-1.51315	1.54168	-0.981499	0.326347	1	0.123191
C2_04390W_A	2.07639	-1.51152	2.63212	-0.57426	0.565792	1	0
C1_07440W_A	83.3567	-1.51012	0.42573	-3.54713	0.000389459	0.00693621	2.95837
C6_03710W_A	5.94118	-1.50795	1.77108	-0.851429	0.394531	1	0
C6_03180C_A	16.4534	-1.50489	1.23211	-1.22139	0.221937	1	0.12275
C4_03090W_A	23.0636	-1.50232	0.824825	-1.82138	0.0685496	0.370678	2.95837
C6_00530C_A	3.30338	-1.49712	2.46805	-0.606598	0.544118	1	0
C1_03990W_A	6.47148	-1.49206	1.71627	-0.869364	0.384648	1	0
C2_01750C_A	27.3163	-1.49113	0.812152	-1.83603	0.0663533	0.367996	2.90062
C1_11510C_A	16.4623	-1.48833	1.04784	-1.42038	0.155496	1	0.12275
CR_05210W_A	3.79508	-1.48749	2.22333	-0.669037	0.503472	1	0
C4_04810C_A	3.79508	-1.48749	2.22333	-0.669037	0.503472	1	0
C5_02940C_A	28.2073	-1.48687	0.777307	-1.91285	0.0557673	0.353019	2.66788
C4_02300W_A	12.0107	-1.48418	1.21847	-1.21807	0.223198	1	0.12275
C1_05470W_A	3.13699	-1.48261	2.29588	-0.645771	0.518428	1	0
C3_03820C_A	4.72581	-1.47919	2.18477	-0.677048	0.498376	1	0
C3_01140W_A	11.8284	-1.47589	1.36041	-1.08489	0.277971	1	0.0561166
C4_00710W_A	9.84664	-1.47415	1.48605	-0.991995	0.3212	1	0.126307
C7_01700W_A	7.26693	-1.47366	1.64917	-0.89358	0.371547	1	0.242098
C3_05800W_A	2.97059	-1.47192	2.32149	-0.634042	0.526053	1	0
C2_10640C_A	6.2084	-1.46743	1.76265	-0.832514	0.405119	1	0
C4_00620C_A	8.50967	-1.46394	4.16919	-0.351134	0.725488	1	0.242098
C4_00880W_A	5.5503	-1.46267	1.83286	-0.798026	0.424856	1	0
C2_05580W_A	26.8662	-1.46203	0.747286	-1.95646	0.050411	0.308055	2.90062
C5_00240W_A	42.0186	-1.46184	0.584135	-2.50258	0.0123292	0.110457	2.90062
C6_00740W_A	46.3761	-1.46074	0.593514	-2.46117	0.0138483	0.11829	2.9232
C5_03250W_A	2.94155	-1.4585	2.566	-0.568393	0.569768	1	0
CR_08330W_A	2.94155	-1.4585	2.566	-0.568393	0.569768	1	0
C3_05380W_A	2.94155	-1.4585	2.566	-0.568393	0.569768	1	0
C4_02330C_A	2.94155	-1.4585	2.566	-0.568393	0.569768	1	0
C3_03550C_A	1.88095	-1.45762	2.9613	-0.492221	0.622563	1	0
C6_01960W_A	9.61673	-1.4559	1.56102	-0.932658	0.350997	1	0.242098
C1_00420W_A	31.751	-1.45425	0.706996	-2.05694	0.039692	0.275623	2.66788
C2_08920W_A	21.6159	-1.45423	2.15841	-0.673754	0.500468	1	0.12275
C2_09370C_A	26.5089	-1.45305	0.819891	-1.77224	0.0763543	0.401091	2.9232
C1_00770C_A	4.32538	-1.45133	2.05212	-0.707236	0.47942	1	0
C3_05140C_A	4.32538	-1.45133	2.05212	-0.707236	0.47942	1	0
C7_00580C_A	5.48266	-1.4508	1.82906	-0.793195	0.427664	1	0
C3_07100C_A	14.0795	-1.44986	1.26332	-1.14766	0.25111	1	0.0561166
C1_06130C_A	87.735	-1.44838	0.404486	-3.5808	0.000342545	0.00693621	2.66788
C1_01900C_A	12.3365	-1.44557	1.33994	-1.07883	0.280664	1	0.242098
C5_04860C_A	1.6158	-1.445	3.10546	-0.465309	0.64171	1	0
C4_01320C_A	12.9898	-1.44451	1.30197	-1.10948	0.267225	1	0.123191
C1_00630W_A	7.43539	-1.44399	1.63642	-0.882411	0.377555	1	0.0561166
C1_10540C_A	9.05533	-1.44243	1.52539	-0.945611	0.344347	1	0.12275
C2_03640W_A	18.986	-1.44132	0.938008	-1.53657	0.124398	1	0.242098
C2_04720C_A	18.7459	-1.43919	1.14458	-1.25739	0.208613	1	0.242098
C1_01760W_A	12.4616	-1.43837	1.33811	-1.07492	0.282408	1	0.123191
C1_12400C_A	6.47561	-1.43776	1.7766	-0.809274	0.418358	1	0
C1_08990C_A	62.8272	-1.43468	0.521063	-2.75338	0.00589834	0.0629786	2.9232
C1_10420C_A	8.23084	-1.43323	1.58181	-0.906073	0.364897	1	0.126307
C6_02370C_A	12.9456	-1.43266	1.16596	-1.22874	0.219171	1	0.242098
CR_02950C_A	6.37686	-1.43129	1.743	-0.821164	0.411553	1	0
C1_14160W_A	1.35066	-1.43052	3.28248	-0.435804	0.662979	1	0
C1_06610C_A	1.35066	-1.43052	3.28248	-0.435804	0.662979	1	0
C1_02020W_A	1.35066	-1.43052	3.28248	-0.435804	0.662979	1	0
C2_01000W_A	1.35066	-1.43052	3.28248	-0.435804	0.662979	1	0
C5_05150C_A	1.35066	-1.43052	3.28248	-0.435804	0.662979	1	0
C4_01790W_A	20.1683	-1.43	1.08273	-1.32074	0.186587	1	0.126307
C3_02030W_A	7.63496	-1.42492	1.68277	-0.84677	0.397123	1	0.12275
C1_00450C_A	16.9285	-1.42464	1.16053	-1.22758	0.219605	1	0.0561166
C4_01550C_A	60.6469	-1.42436	1.28671	-1.10698	0.268302	0.759947	2.66788
C7_03970C_A	9.05739	-1.42377	1.54136	-0.923713	0.355636	1	0.126307
C1_05090W_A	7.07355	-1.42208	1.66398	-0.854625	0.392759	1	0.126307
C5_01920C_A	15.6828	-1.42106	1.36048	-1.04452	0.296243	1	0.126307
C2_03410W_A	13.1969	-1.42052	1.33288	-1.06575	0.286536	1	0.12275
C5_00440C_A	20.704	-1.41886	1.05742	-1.34181	0.179657	1	0.242098
C5_03610W_A	9.55658	-1.41871	1.50209	-0.944492	0.344918	1	0.126307
C7_00450C_A	3.86479	-1.41839	2.10498	-0.673823	0.500424	1	0
C6_02680W_A	4.00214	-1.41815	2.31024	-0.613853	0.539312	1	0
C4_01590C_A	0.75065	-1.41752	4.00844	-0.353634	0.723613	1	0
C1_06420C_A	19.5468	-1.41581	1.08373	-1.30641	0.191412	1	0.123191
C6_01920C_A	20.3036	-1.41571	1.04623	-1.35316	0.176006	1	0.0561166
C3_03460C_A	7.21918	-1.41398	1.90977	-0.740391	0.459063	1	0.126307
C2_07000W_A	4.56148	-1.41199	1.96559	-0.718355	0.472538	1	0
C1_07210C_A	20.7068	-1.4116	0.876192	-1.61106	0.107167	1	0.126307
C2_06780C_A	2.57971	-1.41048	2.68229	-0.52585	0.598993	1	0
C4_06090C_A	2.57971	-1.41048	2.68229	-0.52585	0.598993	1	0
CR_00010C_A	0.820358	-1.40953	3.76856	-0.374023	0.708387	1	0
C1_03980W_A	0.820358	-1.40953	3.76856	-0.374023	0.708387	1	0
CR_06720W_A	8.3993	-1.40843	1.57098	-0.896531	0.369969	1	0.0561166
C3_02140C_A	8.3993	-1.40843	1.57098	-0.896531	0.369969	1	0.123191
C1_11010C_A	5.91627	-1.40696	1.77398	-0.793112	0.427713	1	0
C4_02020W_A	33.8368	-1.40652	2.13875	-0.657636	0.510772	0.904076	2.66788
C2_10460C_A	20.9713	-1.40608	1.04186	-1.34959	0.177146	1	0.0561166
C7_00880C_A	8.1907	-1.40484	1.4595	-0.962549	0.335774	1	0.12275
C1_02200C_A	3.50502	-1.40334	2.59848	-0.540064	0.589153	1	0
C5_01510W_A	10.2209	-1.40163	1.5584	-0.899402	0.368439	1	0.242098
C2_06320W_A	48.7919	-1.40157	0.584429	-2.39819	0.0164764	0.134247	2.90062
CR_08590W_A	13.2439	-1.40074	1.17833	-1.18875	0.234537	1	0.242098
C7_00210C_A	11.9842	-1.39799	1.29784	-1.07717	0.281405	1	0.126307
C5_04620C_A	4.49384	-1.39799	2.01191	-0.694856	0.487145	1	0
C3_06730W_A	4.66024	-1.39795	1.94209	-0.719819	0.471636	1	0
C4_03070W_A	18.5332	-1.39205	0.993074	-1.40176	0.160988	1	0.0561166
CR_07760W_A	3.4042	-1.39059	2.19484	-0.63357	0.526361	1	0
C4_00610W_A	12.7018	-1.3893	1.32628	-1.04752	0.294862	1	0.0561166
C4_04050C_A	637.421	-1.38894	0.184501	-7.52809	5.1486e-14	4.26275e-12	2.66788
C1_11160C_A	2.61082	-1.38762	2.84456	-0.487818	0.625679	1	0
C6_01090C_A	2.61082	-1.38762	2.84456	-0.487818	0.625679	1	0
C6_02150C_A	2.04941	-1.38722	2.88298	-0.481174	0.630393	1	0
C4_05750C_A	7.87107	-1.38608	1.60502	-0.863592	0.387812	1	0.123191
CR_04630C_A	5.45568	-1.38498	1.82293	-0.759752	0.447403	1	0
C6_01190C_A	21.0741	-1.38358	1.02702	-1.34718	0.177922	1	0.0561166
CR_09800C_A	10.3893	-1.37891	1.54047	-0.895121	0.370722	1	0.242098
C1_01780C_A	25.9947	-1.37828	0.795068	-1.73353	0.0830007	0.426355	2.88894
C3_00260C_A	22.371	-1.37715	0.888135	-1.55061	0.120994	0.519653	2.95837
C1_05910W_A	37.1661	-1.37506	0.634826	-2.16605	0.0303077	0.213651	2.88894
C3_04260W_A	8.38807	-1.37497	4.16841	-0.329856	0.741509	1	0.0561166
C2_01490C_A	6.78143	-1.37489	1.69564	-0.810836	0.41746	1	0
C3_00690C_A	12.8129	-1.37269	1.2296	-1.11637	0.264265	1	0.12275
C1_10210C_A	44.6015	-1.37261	0.568515	-2.41437	0.0157624	0.129495	2.90062
C1_05280W_A	20.8519	-1.37193	0.938126	-1.46241	0.143628	1	0.12275
C3_00530C_A	6.61503	-1.36944	1.70265	-0.804301	0.421223	1	0
C1_06720C_A	6.44864	-1.36841	1.73594	-0.788283	0.430531	1	0
CR_00690C_A	7.14533	-1.36728	1.65819	-0.824564	0.409619	1	0.242098
C2_02890W_A	14.6952	-1.36645	1.24509	-1.09747	0.272437	1	0.0561166
C1_05920W_A	11.3491	-1.36534	1.39474	-0.978924	0.327618	1	0.12275
C4_03230C_A	6.97893	-1.36507	1.68064	-0.812234	0.416658	1	0.242098
C5_01050C_A	1.78427	-1.36492	3.00945	-0.453544	0.650157	1	0
C7_01210C_A	1.78427	-1.36492	3.00945	-0.453544	0.650157	1	0
C6_02330W_A	107.506	-1.36448	0.356148	-3.83123	0.000127506	0.0025518	2.95837
C1_01100W_A	36.8038	-1.3643	0.656765	-2.07731	0.0377732	0.265196	2.66788
C2_05730C_A	25.3828	-1.36409	0.772217	-1.76646	0.0773194	0.403141	2.9232
C5_04540C_A	4.2984	-1.36001	2.00939	-0.676828	0.498515	1	0
C1_02850W_A	16.8172	-1.35973	1.16244	-1.16972	0.242112	1	0.242098
CR_04950W_A	8.56982	-1.35947	1.55506	-0.874222	0.381997	1	0.123191
C1_11770C_A	52.6506	-1.35814	0.522756	-2.59804	0.00937571	0.0904769	2.88894
C2_00270C_A	6.32084	-1.35686	1.75887	-0.771438	0.440447	1	0
C1_04580C_A	5.7615	-1.35668	2.04658	-0.662898	0.507396	1	0
CR_05910W_A	9.56278	-1.35582	1.50368	-0.901668	0.367233	1	0.12275
C5_01560C_A	6.02664	-1.35558	2.02056	-0.670896	0.502287	1	0
C3_01500C_A	27.4255	-1.35536	2.15512	-0.6289	0.529415	0.905614	2.66788
C4_02450W_A	11.5258	-1.34891	1.41729	-0.95175	0.341224	1	0.12275
C5_01880C_A	8.27563	-1.34646	1.59575	-0.843778	0.398794	1	0.0561166
C3_01820W_A	14.3071	-1.34511	1.12386	-1.19687	0.231356	1	0.242098
C1_12620W_A	193.08	-1.34375	0.291892	-4.60359	4.15261e-06	0.0001222	2.66788
CR_08890C_A	2.48302	-1.34314	2.71335	-0.495012	0.620592	1	0
C1_09480W_A	6.84004	-1.34116	1.58569	-0.845789	0.39767	1	0.123191
C5_03080C_A	8.10924	-1.34106	1.58952	-0.843686	0.398845	1	0.12275
C2_09460C_A	13.3736	-1.34022	1.28654	-1.04172	0.297539	1	0.0561166
C6_04170C_A	7.23079	-1.33955	4.04777	-0.330936	0.740693	1	0.123191
C1_10750C_A	6.35195	-1.33833	1.74791	-0.765677	0.443868	1	0
C1_03520W_A	61.4802	-1.33783	0.503125	-2.65904	0.00783631	0.0782815	2.88894
C6_03040C_A	20.0375	-1.33727	0.952461	-1.40402	0.160313	1	0.123191
CR_08520C_A	1.51912	-1.33675	3.16557	-0.422278	0.672822	1	0
C3_05930W_A	23.6317	-1.33248	0.82049	-1.624	0.104376	0.492093	2.95837
C4_03150W_A	18.6075	-1.33137	0.950308	-1.40099	0.161217	1	0.126307
C2_03240C_A	95.8169	-1.33042	0.384261	-3.46227	0.000535635	0.00993994	2.66788
C5_02220C_A	2.21788	-1.32916	2.81318	-0.472477	0.636586	1	0
C3_04800C_A	4.07392	-1.32891	2.29339	-0.579453	0.562284	1	0
C2_00840W_A	6.7254	-1.3274	1.96099	-0.676901	0.498469	1	0
C5_05130C_A	5.16356	-1.32734	1.87529	-0.707803	0.479068	1	0
C1_05320C_A	9.99845	-1.31943	1.49402	-0.883141	0.37716	1	0.242098
CR_08200C_A	35.5937	-1.31886	0.696078	-1.89471	0.058131	0.339904	2.95837
C7_00120W_A	10.7939	-1.31657	1.43361	-0.91836	0.358431	1	0.126307
C1_09800C_A	22.0581	-1.31646	0.916268	-1.43677	0.150784	0.612426	2.66788
C1_07110W_A	85.2859	-1.31186	0.39674	-3.30661	0.000944327	0.0146724	2.95837
C3_05740C_A	6.42166	-1.3108	1.72073	-0.761773	0.446195	1	0
C5_03390C_A	6.42166	-1.3108	1.72073	-0.761773	0.446195	1	0
C2_02630W_A	5.36106	-1.30644	1.84763	-0.707091	0.47951	1	0
C6_00120W_A	5.09591	-1.30624	1.89066	-0.690893	0.489633	1	0
C4_01860C_A	9.14285	-1.30579	1.54586	-0.844699	0.398279	1	0.0561166
C4_06740C_A	25.135	-1.30548	2.05403	-0.635571	0.525056	0.905614	2.66788
C5_05220W_A	79.4428	-1.30497	0.510206	-2.55773	0.0105357	0.104036	2.66788
C1_02410C_A	16.3952	-1.30309	1.18986	-1.09517	0.273443	1	0.12275
C1_14200W_A	13.0159	-1.30309	1.32829	-0.981027	0.326579	1	0.123191
C2_04110W_A	1.25397	-1.3009	3.35389	-0.387878	0.698107	1	0
C1_04850C_A	1.25397	-1.3009	3.35389	-0.387878	0.698107	1	0
CR_03080C_A	1.25397	-1.3009	3.35389	-0.387878	0.698107	1	0
C1_09400C_A	46.0497	-1.29899	2.32476	-0.558765	0.576322	0.92195	2.66788
C4_03320W_A	17.8218	-1.29742	1.15851	-1.1199	0.262755	1	0.12275
C1_05850W_A	18.8092	-1.29569	1.0312	-1.2565	0.208936	1	0.242098
C4_05210W_A	14.0094	-1.2942	1.20966	-1.06989	0.28467	1	0.12275
C4_03110W_A	39.5384	-1.29401	2.2514	-0.574758	0.565455	0.904483	2.90062
C2_09920W_A	0.458523	-1.29298	4.35269	-0.297052	0.766427	1	0
C5_04310W_A	8.37852	-1.29134	1.57981	-0.817401	0.413699	1	0.0561166
C1_05820C_A	3.5768	-1.28901	2.57769	-0.500064	0.61703	1	0
C5_01840C_A	10.7358	-1.2882	1.43949	-0.894903	0.370839	1	0.242098
C2_09790W_A	6.85527	-1.28561	1.68182	-0.764415	0.44462	1	0.0561166
C6_01350W_A	16.6721	-1.28441	1.0641	-1.20704	0.227416	1	0.126307
C3_03750C_A	22.1885	-1.27983	0.911293	-1.40441	0.160198	0.599458	2.9232
C1_04330W_A	36.0127	-1.27977	0.690268	-1.85402	0.0637361	0.377965	2.66788
CR_04280C_A	3.18178	-1.27961	2.49015	-0.51387	0.607343	1	0
CR_05760C_A	6.29593	-1.27035	1.75915	-0.722139	0.470209	1	0
C2_07810W_A	48.522	-1.26959	0.621356	-2.04326	0.0410268	0.26427	2.9232
C5_04280C_A	36.1212	-1.26905	0.700004	-1.81292	0.0698442	0.379907	2.90062
C7_02970W_A	13.1939	-1.26865	1.33341	-0.951437	0.341383	1	0.12275
C1_06900C_A	75.4002	-1.26863	0.486615	-2.60706	0.00913244	0.0882026	2.90062
C6_01550C_A	18.0674	-1.26832	1.14905	-1.1038	0.269682	1	0.126307
C3_06620W_A	64.5843	-1.26798	0.493457	-2.56958	0.0101821	0.0942577	2.95837
C1_02940C_A	4.99923	-1.26763	1.90886	-0.664076	0.506641	1	0
CR_03130W_A	6.92498	-1.2674	1.68384	-0.752685	0.451639	1	0.0561166
CR_02650C_A	9.21463	-1.26708	1.54193	-0.821746	0.411221	1	0.12275
C2_05670C_A	1.68758	-1.26537	3.06141	-0.413328	0.679366	1	0
C3_02480C_A	1.68758	-1.26537	3.06141	-0.413328	0.679366	1	0
C6_03660C_A	30.7028	-1.26076	0.684781	-1.84112	0.0656037	0.366156	2.9232
C3_07220C_A	26.5856	-1.26061	2.05248	-0.614189	0.53909	0.901046	2.9232
C6_02670C_A	18.3948	-1.25839	1.11283	-1.1308	0.258139	1	0.12275
C7_00760C_A	2.05148	-1.25783	2.6421	-0.476073	0.634022	1	0
C5_02490C_A	14.2566	-1.2566	1.27585	-0.984906	0.32467	1	0.0561166
C1_01050C_A	26.598	-1.25641	2.12813	-0.590382	0.554935	0.916057	2.66788
C3_07290W_A	27.4776	-1.25638	0.791877	-1.58659	0.112606	0.506015	2.95837
C4_06620C_A	0.98882	-1.25535	3.58483	-0.350183	0.726201	1	0
CR_03900W_A	39.7383	-1.25394	0.667844	-1.8776	0.0604363	0.367509	2.66788
C4_02140C_A	4.67599	-1.25294	2.18593	-0.573181	0.566522	1	0
C4_03450C_A	34.5041	-1.25141	0.676845	-1.84889	0.0644734	0.360693	2.95837
C1_09000W_A	10.2773	-1.25137	1.46291	-0.855396	0.392332	1	0.242098
C1_12410C_A	26.9226	-1.25007	2.0636	-0.605773	0.544665	0.901046	2.90062
C2_07320W_A	43.3313	-1.24935	0.683918	-1.82676	0.0677356	0.371971	2.88894
C2_01190C_A	2.12119	-1.24855	2.85106	-0.437926	0.66144	1	0
CR_06930W_A	2.12119	-1.24855	2.85106	-0.437926	0.66144	1	0
CR_02860W_A	187.949	-1.24742	0.27325	-4.56514	4.99153e-06	0.000132304	2.88894
C1_09550W_A	3.54014	-1.24694	2.05692	-0.60622	0.544369	1	0
C1_02810W_A	19.5507	-1.24675	0.939006	-1.32774	0.184265	1	0.126307
C2_02580W_A	12.0989	-1.24552	1.39381	-0.893605	0.371533	1	0.123191
C6_00660C_A	5.69799	-1.24083	1.80157	-0.688751	0.49098	1	0
C5_03570W_A	5.69799	-1.24083	1.80157	-0.688751	0.49098	1	0
C3_06670C_A	12.6968	-1.2402	1.32231	-0.937901	0.348295	1	0.123191
CR_04310C_A	5.43284	-1.23636	1.83796	-0.672682	0.50115	1	0
C4_03720C_A	10.0571	-1.2325	1.42372	-0.865691	0.38666	1	0.0561166
C2_10720C_A	23.1777	-1.22973	0.825755	-1.48922	0.136429	0.540435	2.95837
CR_03790C_A	14.791	-1.22793	1.23449	-0.994689	0.319887	1	0.242098
CR_00680W_A	4.63739	-1.22427	1.98484	-0.61681	0.53736	1	0
C2_09590C_A	4.63739	-1.22427	1.98484	-0.61681	0.53736	1	0
C6_00900C_A	9.34102	-1.22267	1.84824	-0.661532	0.508271	1	0.126307
C1_13720W_A	9.24987	-1.22195	1.56861	-0.779005	0.435977	1	0.242098
C7_00030W_A	14.704	-1.21989	1.0894	-1.11979	0.262804	1	0.126307
CR_05970C_A	13.8292	-1.21936	1.26954	-0.960473	0.336817	1	0.126307
C2_01510C_A	1.42243	-1.21917	3.22974	-0.377483	0.705815	1	0
C3_03130C_A	1.42243	-1.21917	3.22974	-0.377483	0.705815	1	0
CR_05860W_A	20.1934	-1.21561	0.884189	-1.37483	0.169185	1	0.12275
C2_07630C_A	0.723671	-1.2118	3.89481	-0.311132	0.7557	1	0
C7_02320W_A	46.8932	-1.21156	0.590932	-2.05025	0.0403403	0.263795	2.88894
C2_05190W_A	12.337	-1.21041	1.35546	-0.892987	0.371864	1	0.242098
C3_06770W_A	7.74044	-1.20946	1.93665	-0.624513	0.532291	1	0.0561166
C7_04050W_A	8.32456	-1.20926	1.57586	-0.767363	0.442866	1	0.12275
C5_01400W_A	4.31415	-1.20855	2.24577	-0.538145	0.590477	1	0
C2_02920W_A	11.4117	-1.20768	1.39194	-0.867624	0.3856	1	0.12275
C1_04860W_A	19.7383	-1.20664	1.07042	-1.12726	0.259631	1	0.242098
CR_10860C_A	8.09052	-1.20315	1.64495	-0.731421	0.464522	1	0.242098
C4_06460C_A	4.049	-1.20184	2.29438	-0.523818	0.600405	1	0
C7_03020C_A	10.9125	-1.19727	1.43086	-0.836747	0.402735	1	0.12275
C4_05170C_A	6.66396	-1.19552	1.71658	-0.696455	0.486144	1	0
C2_07680W_A	5.071	-1.19316	1.89755	-0.628791	0.529486	1	0
C3_03510C_A	21.4536	-1.19314	0.866285	-1.3773	0.168418	1	0.0561166
C5_03360W_A	5.93616	-1.19299	1.76811	-0.674727	0.499849	1	0
C1_08800W_A	10.9511	-1.19164	1.42932	-0.833713	0.404443	1	0.123191
C2_04490W_A	71.4402	-1.19159	0.446869	-2.66654	0.00766374	0.0769443	2.88894
C1_12810W_A	10.1847	-1.18933	1.45506	-0.817375	0.413714	1	0.12275
C2_01930C_A	14.7025	-1.18733	1.15149	-1.03112	0.302486	1	0.123191
C7_02110W_A	12.8789	-1.18532	1.3457	-0.880819	0.378416	1	0.242098
C4_05340W_A	14.6329	-1.18468	1.28865	-0.91932	0.357928	1	0.0561166
C2_09240C_A	5.04196	-1.18412	1.8888	-0.626919	0.530712	1	0
C5_01640W_A	9.19178	-1.18334	1.52333	-0.776811	0.43727	1	0.0561166
C2_02160W_A	3.64857	-1.18329	2.55823	-0.462543	0.643692	1	0
C1_04510W_A	3.64857	-1.18329	2.55823	-0.462543	0.643692	1	0
C3_03860W_A	8.25898	-1.1826	1.62799	-0.72642	0.467581	1	0.242098
C6_02420W_A	4.74776	-1.1826	2.17318	-0.544178	0.586319	1	0
CR_09070C_A	53.9299	-1.18215	0.515358	-2.29385	0.0217994	0.164722	2.9232
CR_00900W_A	6.99882	-1.18209	1.67047	-0.707642	0.479168	1	0.123191
C4_05560C_A	51.9436	-1.18163	0.558602	-2.11533	0.0344019	0.23372	2.9232
C1_11250W_A	14.6113	-1.18157	1.18802	-0.994574	0.319944	1	0.126307
C4_04470W_A	4.5407	-1.18098	2.00921	-0.587782	0.556678	1	0
C2_00110W_A	4.5407	-1.18098	2.00921	-0.587782	0.556678	1	0
C3_06810W_A	10.8159	-1.17962	1.43863	-0.819967	0.412235	1	0.242098
C1_07120W_A	25.7153	-1.17935	0.82195	-1.43482	0.151337	0.583037	2.88894
C7_03160W_A	72.2958	-1.17868	0.483101	-2.43982	0.0146947	0.122519	2.9232
CR_05300C_A	24.2135	-1.17729	0.823061	-1.43038	0.152607	0.583037	2.9232
C2_00420W_A	3.25356	-1.17612	2.46813	-0.476524	0.633701	1	0
C1_10330C_A	7.33367	-1.17456	1.65437	-0.709973	0.477721	1	0.242098
CR_03740C_A	8.27474	-1.17405	1.50178	-0.781775	0.434347	1	0.123191
C1_07840W_A	22.3559	-1.17152	0.827604	-1.41556	0.156906	0.623178	2.66788
C5_00260W_A	23.8615	-1.16883	2.02225	-0.577984	0.563275	0.904483	2.88894
C2_09000C_A	8.39633	-1.16803	1.57151	-0.743252	0.457329	1	0.0561166
C2_03450W_A	6.10462	-1.16792	1.75162	-0.666766	0.504922	1	0
C1_07000W_A	2.98841	-1.16485	2.53827	-0.458914	0.646296	1	0
C3_04460W_A	27.5022	-1.16186	0.738978	-1.57225	0.115893	0.514831	2.95837
C7_03000C_A	5.23946	-1.16159	1.86944	-0.62136	0.534363	1	0
C1_02380C_A	2.3187	-1.1592	2.56562	-0.451819	0.6514	1	0
C2_05040C_A	49.7614	-1.15851	0.529313	-2.18871	0.0286178	0.199838	2.95837
C3_05700W_A	46.1341	-1.15827	0.572877	-2.02185	0.0431923	0.274618	2.9232
C2_02060C_A	1.59089	-1.15787	3.11827	-0.371319	0.7104	1	0
C1_06860W_A	1.59089	-1.15787	3.11827	-0.371319	0.7104	1	0
C1_12190W_A	1.59089	-1.15787	3.11827	-0.371319	0.7104	1	0
CR_03540W_A	1.59089	-1.15787	3.11827	-0.371319	0.7104	1	0
C2_01060C_A	1.15728	-1.15786	3.43136	-0.337434	0.73579	1	0
C4_04330C_A	52.161	-1.15529	0.562852	-2.05256	0.0401154	0.258721	2.95837
C2_04030C_A	10.3553	-1.15523	1.45373	-0.794671	0.426805	1	0.242098
C2_06200C_A	14.5307	-1.15249	1.19125	-0.967469	0.33331	1	0.126307
C1_04980C_A	26.6875	-1.15035	0.846277	-1.35931	0.174048	0.62503	2.9232
C4_05770C_A	29.0681	-1.14796	0.722571	-1.58871	0.112125	0.509948	2.90062
C4_05820W_A	3.68717	-1.14622	2.36614	-0.484425	0.628084	1	0
C2_09160W_A	11.8847	-1.1446	1.38236	-0.828003	0.407669	1	0.0561166
C2_10850C_A	16.7236	-1.14423	1.03935	-1.10091	0.270938	1	0.123191
CR_02150W_A	28.2906	-1.13711	0.7324	-1.55259	0.120522	0.538261	2.66788
C2_05740W_A	32.8932	-1.13684	0.733864	-1.54912	0.121353	0.523984	2.9232
C2_03430W_A	7.71346	-1.13619	1.61548	-0.703312	0.481862	1	0.123191
C1_10180C_A	35.0864	-1.13607	0.643687	-1.76494	0.0775739	0.406324	2.90062
C2_01910W_A	4.68012	-1.13567	1.94127	-0.585016	0.558537	1	0
C2_10430C_A	12.1187	-1.13466	1.3735	-0.826102	0.408746	1	0.123191
C7_01830W_A	3.42202	-1.134	2.42578	-0.467479	0.640157	1	0
C1_00780C_A	10.0438	-1.1339	1.32112	-0.85829	0.390732	1	0.242098
CR_08670C_A	5.40793	-1.13271	1.84375	-0.614351	0.538983	1	0
C5_03140C_A	82.2855	-1.13068	0.481477	-2.34836	0.0188565	0.146043	2.95837
C3_05910W_A	7.76935	-1.13055	1.61317	-0.700824	0.483413	1	0.0561166
C6_03880W_A	4.17887	-1.12933	2.11528	-0.533891	0.593417	1	0
C2_05230C_A	4.17887	-1.12933	2.11528	-0.533891	0.593417	1	0
CR_04790W_A	4.17887	-1.12933	2.11528	-0.533891	0.593417	1	0
C4_03140C_A	4.17887	-1.12933	2.11528	-0.533891	0.593417	1	0
C5_01590W_A	15.5795	-1.12847	1.08261	-1.04236	0.297244	1	0.123191
C6_02530C_A	17.4632	-1.12826	1.13781	-0.991608	0.321389	1	0.0561166
C3_01530C_A	166.815	-1.12678	0.298067	-3.7803	0.000156637	0.00310281	2.95837
C1_10970W_A	7.53531	-1.12594	1.72488	-0.652766	0.513907	1	0.0561166
C2_03020C_A	68.1304	-1.12515	0.527315	-2.13373	0.0328649	0.226903	2.9232
C1_07630W_A	9.2988	-1.12453	1.64836	-0.682213	0.495105	1	0.123191
C1_11470C_A	6.80544	-1.12439	1.6872	-0.666427	0.505138	1	0.12275
C4_01560C_A	4.12078	-1.12303	2.27872	-0.492833	0.622131	1	0
CR_03310C_A	14.8481	-1.12287	1.11254	-1.00929	0.312836	1	0.12275
CR_09660W_A	6.52507	-1.12023	1.60532	-0.697823	0.485288	1	0
CR_01150C_A	6.7378	-1.1193	1.76172	-0.635345	0.525203	1	0
C2_05330C_A	20.874	-1.11658	0.88449	-1.2624	0.206804	1	0.0561166
C1_13510C_A	4.81954	-1.11572	2.16055	-0.516406	0.605571	1	0
C7_02990W_A	15.7113	-1.11569	1.20672	-0.924565	0.355192	1	0.126307
CR_06110C_A	10.1735	-1.11374	1.43615	-0.7755	0.438044	1	0.123191
CR_09410W_A	17.142	-1.1122	1.20981	-0.919316	0.35793	1	0.0561166
CR_01560W_A	1.75935	-1.10984	3.02053	-0.367433	0.713296	1	0
C2_02900W_A	1.75935	-1.10984	3.02053	-0.367433	0.713296	1	0
C6_02870W_A	35.7042	-1.10911	0.627959	-1.76621	0.0773602	0.403141	2.9232
C7_00180W_A	17.0798	-1.10596	0.993608	-1.11307	0.265677	1	0.242098
C4_06040W_A	2.89172	-1.10349	2.5639	-0.430394	0.666909	1	0
C4_06260W_A	6.3739	-1.1026	1.75352	-0.628793	0.529485	1	0
CR_01980C_A	19.5399	-1.10104	1.0831	-1.01656	0.309361	1	0.242098
C4_05540W_A	13.3015	-1.09987	1.14639	-0.959423	0.337346	1	0.242098
C2_05830C_A	6.95868	-1.09755	1.55218	-0.707102	0.479503	1	0.242098
C3_02810C_A	20.5529	-1.09269	1.04013	-1.05054	0.293472	1	0.0561166
C2_03570C_A	5.6461	-1.09049	1.79877	-0.606244	0.544353	1	0
C5_00570W_A	20.4769	-1.08931	1.06897	-1.01903	0.308188	1	0.12275
C4_03920W_A	7.84113	-1.08785	1.60859	-0.676275	0.498866	1	0.0561166
C7_04260W_A	15.0553	-1.0867	1.22511	-0.887019	0.375069	1	0.12275
C4_06230C_A	24.8029	-1.08646	0.787648	-1.37937	0.16778	0.637443	2.66788
CR_07220C_A	7.14237	-1.08597	1.65986	-0.654251	0.51295	1	0.242098
C2_02740C_A	9.10336	-1.08254	1.59847	-0.677236	0.498256	1	0.126307
CR_04520W_A	10.9324	-1.08249	1.41919	-0.762752	0.445611	1	0.12275
C4_02030W_A	8.94445	-1.07978	1.59074	-0.678789	0.497271	1	0.12275
C1_04630C_A	21.3055	-1.0791	1.03394	-1.04368	0.296633	1	0.126307
CR_10600C_A	35.4017	-1.07869	2.24636	-0.480193	0.63109	0.92195	2.9232
C2_02520W_A	5.42161	-1.07717	2.07825	-0.518308	0.604243	1	0
C1_04430C_A	9.86976	-1.07707	1.47788	-0.728792	0.466129	1	0.12275
C3_03930W_A	13.0639	-1.0764	1.4236	-0.756106	0.449586	1	0.242098
C3_04120C_A	7.77348	-1.07579	1.64192	-0.655202	0.512338	1	0.126307
CR_05170C_A	432.073	-1.07375	0.201385	-5.33181	9.7237e-08	3.47336e-06	2.9232
C5_02430W_A	0.892133	-1.07341	3.68463	-0.291321	0.770806	1	0
C5_04790C_A	0.892133	-1.07341	3.68463	-0.291321	0.770806	1	0
C3_00050C_A	0.892133	-1.07341	3.68463	-0.291321	0.770806	1	0
C2_10150W_A	0.892133	-1.07341	3.68463	-0.291321	0.770806	1	0
C3_05430W_A	1.92782	-1.07101	2.93512	-0.364896	0.715189	1	0
C1_11110C_A	1.92782	-1.07101	2.93512	-0.364896	0.715189	1	0
C6_01500C_A	1.92782	-1.07101	2.93512	-0.364896	0.715189	1	0
C1_10530W_A	17.9864	-1.06677	1.1981	-0.890381	0.373261	1	0.12275
CR_07660C_A	17.1536	-1.06568	0.984271	-1.08271	0.278939	1	0.123191
C1_08060W_A	23.8431	-1.0654	0.838699	-1.2703	0.203979	0.671263	2.9232
C1_04450C_A	31.1733	-1.06491	0.728085	-1.46261	0.143574	0.562901	2.90062
C7_00830C_A	40.6157	-1.0649	0.65978	-1.61402	0.106523	0.502727	2.90062
C2_00230W_A	7.40958	-1.06462	1.64849	-0.645814	0.5184	1	0.242098
C6_02310W_A	25.5173	-1.06365	0.894377	-1.18927	0.234334	0.714056	2.88894
C3_07710W_A	27.1828	-1.06268	0.766516	-1.38638	0.165632	0.635222	2.66788
C1_09670C_A	7.74444	-1.06208	1.61553	-0.657419	0.510912	1	0.126307
CR_01490C_A	19.1532	-1.06109	1.09445	-0.969519	0.332286	1	0.123191
C7_04060W_A	2.36143	-1.06106	2.74246	-0.386901	0.698829	1	0
C1_03500W_A	64.8188	-1.05952	0.578085	-1.83282	0.0668299	0.367996	2.9232
C2_00780W_A	3.71828	-1.05927	2.146	-0.493603	0.621586	1	0
C5_02380W_A	51.3059	-1.05834	0.660739	-1.60176	0.109209	0.502727	2.95837
C3_00750W_A	7.84319	-1.05816	1.61291	-0.656058	0.511787	1	0.126307
C1_00220W_A	182.415	-1.05719	0.273749	-3.86189	0.000112513	0.00230257	2.9232
C1_06550W_A	9.77307	-1.0567	1.48486	-0.711648	0.476683	1	0.242098
C6_00170C_A	17.4615	-1.05408	1.15576	-0.912026	0.361755	1	0.126307
C4_05590W_A	47.2664	-1.05374	0.571075	-1.84519	0.0650099	0.364531	2.9232
CR_02070C_A	36.0674	-1.05334	0.69735	-1.51049	0.130919	0.535953	2.95837
C7_02080W_A	9.58732	-1.05242	1.34075	-0.784952	0.432482	1	0.126307
C2_00180C_A	7.47929	-1.05168	1.63462	-0.643381	0.519977	1	0.0561166
CR_02420W_A	7.45024	-1.05047	1.67591	-0.626803	0.530788	1	0.123191
C1_01920W_A	10.0733	-1.04985	1.40673	-0.746305	0.455483	1	0.12275
C6_02540C_A	2.65562	-1.04925	2.41861	-0.433824	0.664416	1	0
C3_05070W_A	5.96779	-1.04918	1.65625	-0.633465	0.52643	1	0
C2_03030W_A	16.5771	-1.04861	1.04854	-1.00007	0.317275	1	0.123191
C7_02670W_A	15.6132	-1.04661	1.10951	-0.943308	0.345523	1	0.126307
C2_09580W_A	18.9385	-1.0456	0.934564	-1.11881	0.26322	1	0.12275
C6_01980C_A	5.64816	-1.04554	1.81189	-0.577043	0.56391	1	0
C2_07040W_A	9.17513	-1.04549	1.59451	-0.65568	0.51203	1	0.12275
C2_01710W_A	15.712	-1.04488	1.14406	-0.913307	0.361081	1	0.12275
C3_04340W_A	22.6684	-1.04469	0.824522	-1.26703	0.205146	0.695883	2.66788
CR_00400C_A	33.7536	-1.04446	0.688401	-1.51722	0.129211	0.535329	2.95837
C1_09520C_A	7.13114	-1.04436	4.06823	-0.25671	0.797403	1	0.12275
C1_10730W_A	32.6058	-1.04193	0.699228	-1.49011	0.136195	0.541644	2.9232
CR_07840C_A	10.0983	-1.04173	1.35351	-0.76965	0.441508	1	0.0561166
CR_08160W_A	51.7135	-1.04123	0.523019	-1.9908	0.0465029	0.294112	2.90062
C3_07620C_A	1.4942	-1.04107	3.18001	-0.327378	0.743382	1	0
C7_01350C_A	2.79504	-1.03912	2.59047	-0.401133	0.688322	1	0
C1_03260W_A	8.44526	-1.03783	1.56871	-0.661582	0.508239	1	0.242098
CR_04180C_A	50.7546	-1.03542	0.58066	-1.78318	0.0745573	0.396958	2.9232
CR_02170W_A	14.6685	-1.03368	1.24133	-0.832716	0.405005	1	0.0561166
C3_02850C_A	6.48634	-1.03295	1.74152	-0.593134	0.553092	1	0
C7_00800C_A	2.09628	-1.03273	2.85673	-0.361507	0.717721	1	0
C1_00390W_A	7.7465	-1.03185	1.62132	-0.636424	0.5245	1	0.123191
CR_05260C_A	6.12244	-1.03174	1.82757	-0.564542	0.572385	1	0
C6_01590W_A	18.6132	-1.03172	1.02333	-1.0082	0.313359	1	0.0561166
C7_01410C_A	26.0683	-1.02901	0.779598	-1.31992	0.186861	0.672654	2.66788
C1_09190C_A	32.3178	-1.02839	0.804343	-1.27854	0.201058	0.666756	2.9232
C3_01000W_A	18.2631	-1.02778	1.11968	-0.917921	0.35866	1	0.242098
C3_03180C_A	33.2106	-1.02757	0.656707	-1.56473	0.117647	0.517936	2.9232
C4_02470C_A	44.8826	-1.0263	0.579368	-1.77141	0.076492	0.426355	2.66788
C2_05340C_A	13.7259	-1.02384	1.24899	-0.819734	0.412368	1	0.123191
C4_02930W_A	3.22865	-1.02378	2.46974	-0.414531	0.678485	1	0
CR_01800C_A	3.22865	-1.02378	2.46974	-0.414531	0.678485	1	0
C2_00200W_A	3.22865	-1.02378	2.46974	-0.414531	0.678485	1	0
C2_06700W_A	19.8369	-1.02333	0.95644	-1.06993	0.284649	1	0.0561166
C2_08650W_A	10.476	-1.0233	1.47347	-0.694487	0.487377	1	0.12275
C2_09670C_A	14.5642	-1.02262	1.0824	-0.944774	0.344774	1	0.126307
C1_12160W_A	15.3693	-1.02212	1.21803	-0.839156	0.401382	1	0.242098
C3_00380C_A	8.24982	-1.01754	1.58214	-0.643142	0.520132	1	0.12275
C4_00060W_A	0.361836	-1.01563	4.62497	-0.219596	0.826186	1	0
CR_09480W_A	10.2494	-1.01481	1.46585	-0.6923	0.488749	1	0.0561166
C4_06160W_A	2.52989	-1.01292	2.67641	-0.378461	0.705088	1	0
C1_02010C_A	2.52989	-1.01292	2.67641	-0.378461	0.705088	1	0
CR_04780W_A	2.52989	-1.01292	2.67641	-0.378461	0.705088	1	0
CR_10810C_A	3.66226	-1.01235	2.36791	-0.427531	0.668993	1	0
CR_06520C_A	3.66226	-1.01235	2.36791	-0.427531	0.668993	1	0
CR_09860W_A	18.8922	-1.01135	0.930378	-1.08703	0.277025	1	0.126307
C1_01540W_A	34	-1.01002	0.710915	-1.42073	0.155395	0.589407	2.90062
C1_06940C_A	17.7136	-1.00888	1.04457	-0.965832	0.334128	1	0.126307
C1_11750W_A	16.9429	-1.00848	1.01692	-0.991697	0.321345	1	0.242098
C4_03030C_A	7.98467	-1.00639	1.59973	-0.629101	0.529283	1	0.12275
C7_03620C_A	12.2104	-1.00565	1.35806	-0.740506	0.458993	1	0.126307
C2_03780C_A	23.234	-1.00416	0.829625	-1.21038	0.226134	0.696033	2.9232
CR_06840W_A	5.98508	-1.00374	1.77095	-0.566779	0.570864	1	0
C5_04680W_A	24.4774	-1.00373	0.827479	-1.213	0.225131	0.697322	2.88894
C7_00140C_A	4.09587	-1.0036	2.28056	-0.440065	0.65989	1	0
C1_13670W_A	1.66267	-1.00296	3.07403	-0.32627	0.74422	1	0
CR_02550C_A	2.9635	-0.999758	2.53994	-0.393615	0.693865	1	0
C1_01320W_A	31.8303	-0.999253	0.710113	-1.40717	0.159376	0.62503	2.66788
C4_02100C_A	4.85272	-0.99904	1.94847	-0.51273	0.608141	1	0
CR_02720C_A	4.85272	-0.99904	1.94847	-0.51273	0.608141	1	0
C1_13250W_A	37.6394	-0.99864	0.628883	-1.58796	0.112296	0.509948	2.90062
C2_09300W_A	11.6028	-0.998405	1.29496	-0.77099	0.440713	1	0.0561166
C6_04330W_A	1.06059	-0.99831	3.51595	-0.283937	0.776458	1	0
CR_03440W_A	1.06059	-0.99831	3.51595	-0.283937	0.776458	1	0
C2_04990W_A	1.06059	-0.99831	3.51595	-0.283937	0.776458	1	0
C2_05860C_A	1.06059	-0.99831	3.51595	-0.283937	0.776458	1	0
CR_02600W_A	1.06059	-0.99831	3.51595	-0.283937	0.776458	1	0
C1_00560W_A	1.06059	-0.99831	3.51595	-0.283937	0.776458	1	0
C1_12310C_A	1.06059	-0.99831	3.51595	-0.283937	0.776458	1	0
C1_09950C_A	12.1523	-0.995488	1.37625	-0.723333	0.469475	1	0.123191
C4_00760W_A	16.523	-0.995365	1.08508	-0.917316	0.358977	1	0.123191
C1_05540C_A	85.6108	-0.995261	0.393495	-2.52929	0.0114294	0.102721	2.95837
C2_09030W_A	3.79212	-0.993189	2.52253	-0.393728	0.693782	1	0
C1_00750C_A	36.6541	-0.992969	0.700804	-1.4169	0.156512	0.589407	2.9232
C3_07450C_A	7.38467	-0.992417	1.65305	-0.600354	0.54827	1	0.242098
C4_02490W_A	23.0579	-0.991986	0.893562	-1.11015	0.266935	0.73842	2.9232
C4_02040W_A	13.1978	-0.990184	1.22144	-0.810671	0.417554	1	0.0561166
C4_05790W_A	16.7729	-0.989195	1.04278	-0.948617	0.342815	1	0.242098
CR_05480W_A	12.1137	-0.989106	1.36447	-0.724899	0.468514	1	0.126307
C5_02830W_A	13.2537	-0.989015	1.14611	-0.862932	0.388175	1	0.126307
C1_04770C_A	35.8998	-0.987669	0.629762	-1.56832	0.116807	0.517936	2.9232
C4_03200C_A	5.71994	-0.987483	1.80402	-0.547379	0.584119	1	0
C4_02290W_A	14.1133	-0.986406	1.26546	-0.779482	0.435696	1	0.126307
C1_06840C_A	2.82615	-0.986194	2.75688	-0.357721	0.720552	1	0
CR_01380W_A	14.8162	-0.98541	1.17375	-0.839542	0.401165	1	0.0561166
C4_00590C_A	27.7041	-0.984526	2.15537	-0.456778	0.647831	0.926457	2.90062
C1_01210W_A	37.1716	-0.983814	0.636439	-1.54581	0.122151	0.540435	2.66788
C6_00390W_A	10.0465	-0.982132	1.49189	-0.658315	0.510335	1	0.0561166
C6_02110W_A	4.58757	-0.981826	2.01115	-0.488192	0.625414	1	0
CR_00020W_A	16.3222	-0.981517	1.04369	-0.940434	0.346995	1	0.126307
CR_03220C_A	2.26474	-0.981297	2.77788	-0.353254	0.723898	1	0
C1_12240C_A	2.26474	-0.981297	2.77788	-0.353254	0.723898	1	0
C2_02710C_A	2.26474	-0.981297	2.77788	-0.353254	0.723898	1	0
C5_01470C_A	2.26474	-0.981297	2.77788	-0.353254	0.723898	1	0
C1_03330C_A	11.0144	-0.98093	1.30087	-0.754055	0.450816	1	0.126307
C1_06520C_A	19.992	-0.980345	0.886062	-1.10641	0.26855	1	0.126307
C5_02230W_A	45.2469	-0.978247	0.629533	-1.55392	0.120203	0.523984	2.90062
CR_09170C_A	4.26433	-0.978004	2.24922	-0.434819	0.663694	1	0
C2_08910C_A	11.1498	-0.977575	1.42647	-0.685309	0.493149	1	0.12275
C1_02420C_A	123.467	-0.977182	0.326286	-2.99486	0.00274568	0.0353002	2.90062
C6_02790C_A	11.7208	-0.976345	1.38015	-0.70742	0.479305	1	0.123191
C2_03310C_A	8.5191	-0.975011	1.58063	-0.61685	0.537334	1	0.123191
C1_12900W_A	24.4537	-0.974894	0.904977	-1.07726	0.281365	0.742515	2.9232
CR_02970C_A	30.3265	-0.974373	0.727869	-1.33867	0.18068	0.662589	2.66788
C1_10200C_A	1.83113	-0.972502	2.98204	-0.32612	0.744334	1	0
C4_00280W_A	55.7154	-0.972279	0.562675	-1.72796	0.0839955	0.45723	2.66788
C3_00900C_A	36.6527	-0.971917	0.652948	-1.48851	0.136617	0.543157	2.90062
C4_00790C_A	5.06184	-0.971711	1.93326	-0.502629	0.615225	1	0
CR_04030W_A	19.2104	-0.971708	1.12629	-0.862749	0.388276	1	0.123191
C7_00290C_A	5.13155	-0.970424	2.11261	-0.459349	0.645983	1	0
C5_05230C_A	47.4248	-0.969164	0.561888	-1.72484	0.0845572	0.458494	2.66788
C2_08060W_A	6.75562	-0.96739	1.6939	-0.571103	0.56793	1	0
C4_04460C_A	22.381	-0.966906	1.01817	-0.949647	0.342292	0.798431	2.88894
CR_09500C_A	13.2482	-0.962441	1.1419	-0.84284	0.399318	1	0.12275
CR_08050C_A	38.269	-0.958927	0.626773	-1.52994	0.126031	0.535329	2.9232
C5_05480W_A	35.2764	-0.958598	0.64567	-1.48466	0.137635	0.577542	2.66788
CR_03240C_A	3.99918	-0.957037	2.29794	-0.416477	0.677061	1	0
CR_00330C_A	23.0061	-0.955899	2.05425	-0.465328	0.641696	0.923893	2.95837
CR_01180W_A	13.8523	-0.955085	1.30347	-0.732726	0.463725	1	0.12275
CR_06070W_A	111.497	-0.954185	0.376631	-2.53347	0.0112938	0.103462	2.88894
C1_07050C_A	4.8664	-0.952574	2.15028	-0.443	0.657766	1	0
CR_07890W_A	28.413	-0.951312	0.751163	-1.26645	0.205351	0.695883	2.66788
C2_00630C_A	11.4094	-0.950985	1.31099	-0.725395	0.46821	1	0.126307
CR_08070W_A	17.6948	-0.95093	0.973428	-0.976888	0.328625	1	0.242098
C2_02870W_A	6.05686	-0.950355	1.76379	-0.538815	0.590015	1	0
C2_00640W_A	5.62325	-0.95011	1.81821	-0.522552	0.601286	1	0
C7_00470C_A	6.60084	-0.950048	1.96535	-0.483399	0.628812	1	0
C2_08830W_A	19.4521	-0.949755	0.945989	-1.00398	0.315387	1	0.126307
C4_01460C_A	8.72823	-0.949639	1.56894	-0.605276	0.544996	1	0.242098
C3_05060W_A	1.22906	-0.948523	3.37236	-0.281264	0.778508	1	0
C7_03380W_A	1.22906	-0.948523	3.37236	-0.281264	0.778508	1	0
C1_12950W_A	23.0101	-0.946327	0.85245	-1.11013	0.266945	0.73842	2.88894
C2_08840W_A	1.99959	-0.942134	2.89863	-0.325027	0.745161	1	0
CR_06620W_A	22.1021	-0.940314	0.859343	-1.09422	0.273857	0.73842	2.90062
CR_05640C_A	4.39213	-0.939439	1.99328	-0.471303	0.637425	1	0
C3_00680C_A	4.39213	-0.939439	1.99328	-0.471303	0.637425	1	0
C2_03360W_A	36.7091	-0.939305	0.668216	-1.40569	0.159816	0.625504	2.66788
C2_06670C_A	51.535	-0.939268	0.528891	-1.77592	0.0757462	0.399635	2.9232
C1_00400W_A	32.7429	-0.938223	0.757008	-1.23938	0.215204	0.684867	2.95837
C6_00790C_A	1014.78	-0.938123	0.194348	-4.82701	1.38596e-06	3.84361e-05	2.95837
C5_02560C_A	31.0742	-0.93794	0.728458	-1.28757	0.197896	0.665242	2.90062
C6_04430W_A	19.0323	-0.937751	0.932612	-1.00551	0.314652	1	0.123191
C1_13260W_A	23.2505	-0.936991	2.09227	-0.447834	0.654273	0.923893	2.95837
C2_01320W_A	12.1585	-0.936899	1.35481	-0.691534	0.48923	1	0.0561166
C7_00620W_A	23.523	-0.936862	0.865925	-1.08192	0.279288	0.73842	2.95837
C1_11690W_A	7.61161	-0.936172	4.13355	-0.226482	0.820827	1	0.12275
C5_00840W_A	6.65893	-0.935963	1.70321	-0.549528	0.582643	1	0
C1_02470W_A	5.57898	-0.935457	1.70288	-0.549337	0.582774	1	0
C7_02850W_A	22.5978	-0.934379	0.824116	-1.1338	0.25688	0.734372	2.9232
C5_04350C_A	3.30042	-0.934061	2.44946	-0.381333	0.702956	1	0
CR_02890C_A	3.30042	-0.934061	2.44946	-0.381333	0.702956	1	0
C1_10820C_A	6.22532	-0.933776	1.74581	-0.534868	0.592741	1	0
C2_06740W_A	38.525	-0.933751	0.619659	-1.50688	0.131842	0.535953	2.95837
CR_03150W_A	18.3685	-0.933007	1.16435	-0.801309	0.422952	1	0.123191
C4_02950C_A	7.87276	-0.931827	1.45902	-0.638667	0.52304	1	0.12275
C3_02310W_A	1.86017	-0.93168	3.128	-0.297852	0.765816	1	0
C6_01030W_A	3.59461	-0.931412	2.14262	-0.434706	0.663776	1	0
C1_06360W_A	5.3581	-0.930639	1.85825	-0.500815	0.616501	1	0
C5_01450W_A	25.7863	-0.928323	0.749807	-1.23808	0.215686	0.687667	2.90062
C5_00510W_A	14.2162	-0.928161	1.12773	-0.823031	0.41049	1	0.0561166
CR_04330W_A	7.69461	-0.92729	1.62084	-0.572104	0.567251	1	0.242098
C3_00560C_A	7.69461	-0.92729	1.62084	-0.572104	0.567251	1	0.126307
CR_06950C_A	11.93	-0.927288	1.22875	-0.754658	0.450454	1	0.126307
C2_01340W_A	36.9977	-0.925197	0.655256	-1.41196	0.157961	0.599265	2.88894
C2_06630C_A	147.266	-0.92454	0.307198	-3.00959	0.00261597	0.0363308	2.66788
C1_07690C_A	13.4614	-0.920488	1.29725	-0.709567	0.477972	1	0.12275
C1_03630W_A	11.2313	-0.920382	1.27764	-0.720375	0.471294	1	0.123191
C1_14420W_A	11.5004	-0.919596	1.40531	-0.654371	0.512873	1	0.12275
C3_04580C_A	15.0931	-0.918394	1.1193	-0.820511	0.411925	1	0.12275
C2_09140C_A	8.9278	-0.91489	1.55086	-0.589923	0.555243	1	0.0561166
C1_10310W_A	1.39752	-0.913233	3.24594	-0.281346	0.778445	1	0
C4_03880W_A	1.39752	-0.913233	3.24594	-0.281346	0.778445	1	0
C6_03960W_A	55.7517	-0.91291	0.555681	-1.64287	0.100411	0.489504	2.9232
C4_00360C_A	4.76971	-0.912902	2.1644	-0.421781	0.673185	1	0
C1_09980C_A	13.5021	-0.912608	1.30676	-0.698375	0.484942	1	0.12275
C4_00380W_A	6.85838	-0.912168	1.78686	-0.510487	0.609711	1	0.242098
C6_02270C_A	4.65934	-0.910498	1.99919	-0.455433	0.648797	1	0
C1_14380C_A	18.0628	-0.90982	1.01152	-0.899459	0.368408	1	0.123191
C1_14320C_A	30.0411	-0.906965	0.703717	-1.28882	0.197461	0.687226	2.66788
C1_13110C_A	40.9765	-0.90677	0.612592	-1.48022	0.138815	0.542207	2.95837
C3_03540W_A	18.5737	-0.906695	0.952342	-0.952069	0.341062	1	0.12275
C3_05520C_A	24.741	-0.905299	0.783503	-1.15545	0.247906	0.72357	2.95837
C3_01150C_A	5.36017	-0.901438	1.95101	-0.462036	0.644055	1	0
C2_00120C_A	22.1744	-0.901174	0.825633	-1.0915	0.275055	0.73842	2.90062
C3_07920W_A	9.89934	-0.900583	1.75579	-0.512922	0.608006	1	0.12275
CR_09210W_A	2.60166	-0.900177	2.6482	-0.33992	0.733917	1	0
CR_01190C_A	2.60166	-0.900177	2.6482	-0.33992	0.733917	1	0
C4_03840C_A	2.60166	-0.900177	2.6482	-0.33992	0.733917	1	0
C7_01280C_A	2.60166	-0.900177	2.6482	-0.33992	0.733917	1	0
C7_01720W_A	17.1472	-0.899893	0.984448	-0.91411	0.360659	1	0.0561166
CR_10270C_A	10.5656	-0.899785	1.44011	-0.624802	0.532101	1	0.0561166
CR_05700C_A	16.853	-0.899067	0.98523	-0.912545	0.361482	1	0.242098
C7_03830C_A	20.101	-0.89894	0.931507	-0.965039	0.334525	1	0.126307
C6_03430C_A	46.0171	-0.897342	0.592178	-1.51532	0.12969	0.53629	2.88894
C3_07120W_A	2.16805	-0.896402	2.8154	-0.318393	0.750187	1	0
C2_04980C_A	13.8992	-0.895582	1.30564	-0.685933	0.492755	1	0.123191
CR_09460C_A	4.72905	-0.89496	1.93133	-0.46339	0.643085	1	0
C7_00670C_A	22.1704	-0.892866	0.86825	-1.02835	0.303784	0.772872	2.88894
C7_01220W_A	13.1887	-0.892183	1.14775	-0.777333	0.436962	1	0.126307
C1_08540C_A	52.9262	-0.891784	0.586045	-1.5217	0.128085	0.535953	2.88894
C1_00480C_A	16.0382	-0.891141	1.19797	-0.743878	0.45695	1	0.242098
C2_03120W_A	6.73071	-0.890196	1.69777	-0.524333	0.600047	1	0
C2_02840C_A	11.4949	-0.889639	1.25651	-0.708025	0.47893	1	0.12275
C4_00540C_A	13.268	-0.889628	1.30795	-0.68017	0.496397	1	0.123191
CR_08950W_A	52.2527	-0.888989	2.4528	-0.362438	0.717025	0.952788	2.90062
C3_01360C_A	21.5123	-0.888248	0.852062	-1.04247	0.297195	1	0.242098
C1_06440C_A	4.36515	-0.88739	1.99037	-0.445841	0.655712	1	0
C6_03810W_A	9.96555	-0.887346	1.49499	-0.593545	0.552817	1	0.242098
C7_00270W_A	12.4008	-0.887291	1.35349	-0.655559	0.512108	1	0.12275
CR_01570W_A	1.56598	-0.88682	3.13276	-0.283079	0.777116	1	0
C3_01620W_A	1.56598	-0.88682	3.13276	-0.283079	0.777116	1	0
CR_08720W_A	4.90927	-0.88622	1.92638	-0.460045	0.645484	1	0
C1_05170C_A	40.4656	-0.885248	0.623278	-1.42031	0.155517	0.619952	2.66788
C1_09110W_A	3.86183	-0.88392	2.11464	-0.418001	0.675947	1	0
C1_01300W_A	34.6119	-0.878239	0.643042	-1.36576	0.172015	0.619952	2.95837
CR_07080W_A	30.2234	-0.877387	0.747162	-1.17429	0.240278	0.73842	2.66788
CR_08780W_A	2.46225	-0.876739	2.50187	-0.350433	0.726014	1	0
C4_00820W_A	3.56764	-0.876108	2.17718	-0.402404	0.687386	1	0
C1_13620W_A	45.921	-0.875982	0.547636	-1.59957	0.109694	0.503913	2.90062
C2_01640W_A	95.6408	-0.875962	0.369266	-2.37217	0.0176839	0.140657	2.9232
C2_00810C_A	4.89751	-0.875431	1.903	-0.460027	0.645497	1	0
C2_01430W_A	28.76	-0.875014	0.745249	-1.17412	0.240346	0.714056	2.95837
C4_04970C_A	11.0709	-0.874239	1.41178	-0.619246	0.535755	1	0.12275
C7_00300W_A	30.204	-0.873088	0.747753	-1.16762	0.242961	0.73842	2.66788
C4_06440C_A	5.42988	-0.872122	1.84962	-0.471515	0.637273	1	0
C2_03440W_A	21.7545	-0.871316	0.923373	-0.943623	0.345362	0.813778	2.66788
C3_02450W_A	34.3931	-0.869832	0.689071	-1.26232	0.206832	0.676261	2.88894
C6_00800C_A	26.4512	-0.869086	0.766466	-1.13389	0.256841	0.742515	2.66788
CR_01740W_A	4.99627	-0.866929	1.92667	-0.449962	0.652738	1	0
C3_04000C_A	1.73444	-0.866129	3.03269	-0.285597	0.775187	1	0
C1_14490C_A	1.73444	-0.866129	3.03269	-0.285597	0.775187	1	0
C1_10500W_A	1.73444	-0.866129	3.03269	-0.285597	0.775187	1	0
C1_01820C_A	11.2878	-0.865844	1.319	-0.65644	0.511541	1	0.123191
CR_10300W_A	47.7764	-0.864041	2.42089	-0.35691	0.721159	0.962515	2.66788
C2_04470W_A	139.983	-0.862913	0.311709	-2.76833	0.00563438	0.0608213	2.9232
C1_06730W_A	16.7431	-0.862806	1.19063	-0.724664	0.468658	1	0.0561166
C3_07630C_A	9.74107	-0.862628	1.49499	-0.577012	0.563931	1	0.123191
C7_03590C_A	9.00164	-0.86107	1.57889	-0.545363	0.585504	1	0.242098
C2_00860C_A	28.4833	-0.858567	0.739771	-1.16058	0.245811	0.73842	2.66788
C3_01830C_A	10.3431	-0.858445	1.46274	-0.586875	0.557287	1	0.126307
C2_07270W_A	2.33651	-0.85782	2.74276	-0.312758	0.754465	1	0
C5_02770W_A	2.33651	-0.85782	2.74276	-0.312758	0.754465	1	0
C1_13820C_A	2.33651	-0.85782	2.74276	-0.312758	0.754465	1	0
CR_03820C_A	2.33651	-0.85782	2.74276	-0.312758	0.754465	1	0
C2_10470C_A	25.2119	-0.856591	0.831656	-1.02998	0.303018	0.76794	2.95837
C5_04560C_A	34.3101	-0.854492	0.66626	-1.28252	0.19966	0.666756	2.90062
C1_08780W_A	25.1675	-0.853548	0.786718	-1.08495	0.277944	0.73842	2.95837
C2_06880C_A	79.4691	-0.853439	0.481532	-1.77234	0.0763377	0.39944	2.95837
CR_05570C_A	16.6093	-0.852805	1.24281	-0.686192	0.492592	1	0.123191
C7_03170W_A	13.0339	-0.852066	1.23198	-0.691622	0.489175	1	0.123191
C1_04480C_A	64.0445	-0.851887	0.542061	-1.57157	0.11605	0.517936	2.88894
C5_04600C_A	58.7056	-0.851603	0.480796	-1.77123	0.0765217	0.403141	2.90062
C1_05940W_A	32.4663	-0.847408	0.721157	-1.17507	0.239967	0.73842	2.66788
CR_07520C_A	34.785	-0.847315	0.637692	-1.32872	0.18394	0.637443	2.9232
CR_10710C_A	7.98727	-0.846566	1.4799	-0.572042	0.567293	1	0.123191
C4_01670C_A	1.9029	-0.844862	2.94379	-0.286998	0.774114	1	0
C3_01250W_A	38.6935	-0.844813	0.707679	-1.19378	0.232564	0.702132	2.95837
C3_03560W_A	8.65712	-0.844483	1.58902	-0.531449	0.595108	1	0.123191
C5_02690W_A	13.5159	-0.843693	1.13686	-0.742123	0.458013	1	0.123191
C7_02450W_A	17.8774	-0.843373	1.00767	-0.836957	0.402617	1	0.242098
C1_05990C_A	5.43194	-0.842524	1.94252	-0.433728	0.664486	1	0
CR_02210W_A	57.7304	-0.841502	0.519528	-1.61974	0.105287	0.502316	2.90062
C5_05160C_A	10.7498	-0.840619	1.46418	-0.574123	0.565885	1	0.0561166
CR_01000C_A	29.0839	-0.839718	0.826611	-1.01586	0.309698	0.776469	2.88894
C1_08210C_A	63.5665	-0.837808	0.513868	-1.63039	0.103018	0.492093	2.9232
C2_10860C_A	23.5534	-0.837723	2.09852	-0.399196	0.689749	0.941042	2.9232
C6_01290C_A	8.20413	-0.836471	1.61588	-0.517656	0.604698	1	0.242098
C4_02570C_A	20.0223	-0.835911	0.934337	-0.894656	0.370971	1	0.126307
C1_11080W_A	18.6211	-0.834295	1.12191	-0.743641	0.457094	1	0.0561166
CR_06060W_A	20.8376	-0.833864	0.903077	-0.923359	0.35582	1	0.12275
C1_10910C_A	7.57301	-0.83253	1.63133	-0.510338	0.609815	1	0.126307
C3_03370C_A	120.809	-0.8321	0.335881	-2.47737	0.0132355	0.113189	2.95837
C5_00420C_A	3.23278	-0.831674	2.23284	-0.372473	0.709541	1	0
C3_06350W_A	3.23278	-0.831674	2.23284	-0.372473	0.709541	1	0
C1_03940W_A	5.33319	-0.831414	1.86714	-0.445287	0.656112	1	0
C2_08620W_A	7.0564	-0.831263	4.07799	-0.203842	0.838477	1	0.12275
C1_09090C_A	8.17509	-0.830788	1.58976	-0.522587	0.601261	1	0.12275
C3_00760W_A	71.4538	-0.830105	0.529021	-1.56914	0.116616	0.517936	2.90062
C6_01740C_A	23.6036	-0.829716	0.80516	-1.0305	0.302777	0.772872	2.88894
C1_14170W_A	54.3543	-0.829336	0.514235	-1.61276	0.106798	0.517936	2.66788
C1_03480C_A	35.4741	-0.828848	0.632184	-1.31109	0.189829	0.640887	2.95837
CR_07280W_A	13.2838	-0.828155	1.15182	-0.718995	0.472144	1	0.123191
C2_06940C_A	17.8175	-0.827885	0.99967	-0.828158	0.407581	1	0.0561166
C5_04970C_A	5.93526	-0.826862	1.78238	-0.463908	0.642714	1	0
C1_04540C_A	18.5666	-0.826473	0.930631	-0.888078	0.374499	1	0.123191
C6_00600C_A	46.8941	-0.826214	0.675468	-1.22317	0.221265	0.688485	2.95837
C6_03800C_A	70.817	-0.8256	0.528179	-1.56311	0.118028	0.519653	2.88894
C2_04690C_A	2.50497	-0.824806	2.67934	-0.30784	0.758204	1	0
C6_03010W_A	68.2147	-0.824752	0.460688	-1.79026	0.073412	0.394973	2.90062
C7_02930C_A	7.74148	-0.822693	1.61944	-0.50801	0.611446	1	0.126307
C4_05390W_A	15.6651	-0.82197	1.25888	-0.652935	0.513798	1	0.242098
C1_12820C_A	14.8596	-0.821559	1.13355	-0.724768	0.468595	1	0.12275
C5_02710W_A	75.9775	-0.821404	0.446859	-1.83817	0.0660367	0.367996	2.88894
C2_07140W_A	19.9102	-0.821364	0.894044	-0.918706	0.358249	1	0.123191
C1_10190W_A	4.14273	-0.819242	2.26823	-0.361181	0.717964	1	0
C3_00580W_A	14.0564	-0.818511	1.27729	-0.640818	0.521641	1	0.12275
CR_02270C_A	0.963908	-0.81793	3.60966	-0.226595	0.820739	1	0
C2_08080C_A	0.963908	-0.81793	3.60966	-0.226595	0.820739	1	0
C4_04880W_A	0.963908	-0.81793	3.60966	-0.226595	0.820739	1	0
C5_01170W_A	0.963908	-0.81793	3.60966	-0.226595	0.820739	1	0
CR_04900C_A	0.963908	-0.81793	3.60966	-0.226595	0.820739	1	0
C5_01060C_A	0.963908	-0.81793	3.60966	-0.226595	0.820739	1	0
CR_10760C_A	4.46597	-0.81735	2.06283	-0.396227	0.691937	1	0
C5_02000C_A	64.6705	-0.817006	0.469262	-1.74104	0.0816758	0.448519	2.66788
C3_01190C_A	18.7199	-0.815879	0.944628	-0.863704	0.387751	1	0.242098
C5_04410C_A	9.84395	-0.814058	1.50934	-0.539348	0.589647	1	0.242098
C1_06200W_A	15.0377	-0.811877	1.15705	-0.701677	0.482881	1	0.123191
C2_09770C_A	12.7322	-0.810892	1.19066	-0.681047	0.495842	1	0.242098
C5_05500C_A	18.2918	-0.810199	0.983301	-0.823958	0.409963	1	0.123191
C2_02500W_A	12.4263	-0.809939	1.18906	-0.68116	0.49577	1	0.126307
C3_07610W_A	55.3116	-0.808655	0.494179	-1.63636	0.101764	0.491923	2.9232
C3_03870C_A	52.7693	-0.807318	0.54511	-1.48102	0.138602	0.549942	2.90062
C7_03710C_A	12.1535	-0.806344	1.35764	-0.593932	0.552558	1	0.126307
C7_02220C_A	2.07136	-0.805683	2.85549	-0.282153	0.777826	1	0
C1_05490C_A	14.7358	-0.804812	1.12867	-0.713059	0.475809	1	0.12275
C1_01510W_A	11.6211	-0.804259	1.3881	-0.579397	0.562321	1	0.123191
C5_01290C_A	10.2796	-0.803936	1.50962	-0.532542	0.59435	1	0.123191
C1_08550C_A	77.2722	-0.80389	0.495981	-1.62081	0.105059	0.499764	2.9232
C2_04800C_A	9.47038	-0.803228	1.41086	-0.56932	0.569139	1	0.12275
C4_00390W_A	16.2535	-0.803069	1.01597	-0.790449	0.429266	1	0.126307
C4_06420W_A	12.9531	-0.802927	1.3283	-0.604478	0.545526	1	0.242098
C1_11810W_A	14.5618	-0.802846	1.25974	-0.637311	0.523922	1	0.123191
CR_02250C_A	4.31119	-0.801941	2.23771	-0.358375	0.720062	1	0
C5_03740W_A	4.31119	-0.801941	2.23771	-0.358375	0.720062	1	0
C3_06340W_A	0.530297	-0.801501	4.19098	-0.191244	0.848334	1	0
C3_05820W_A	0.530297	-0.801501	4.19098	-0.191244	0.848334	1	0
C6_02950C_A	0.530297	-0.801501	4.19098	-0.191244	0.848334	1	0
C7_02290W_A	0.530297	-0.801501	4.19098	-0.191244	0.848334	1	0
C4_01000C_A	0.530297	-0.801501	4.19098	-0.191244	0.848334	1	0
CR_07140C_A	0.530297	-0.801501	4.19098	-0.191244	0.848334	1	0
C5_04890C_A	8.49072	-0.800679	1.70748	-0.468924	0.639124	1	0.12275
C1_13300C_A	86.5235	-0.80053	1.06038	-0.754943	0.450283	0.861759	2.90062
C1_11120C_A	36.094	-0.798971	0.678894	-1.17687	0.239246	0.73842	2.66788
C4_02170C_A	2.67344	-0.796197	2.62171	-0.303694	0.761361	1	0
C2_04550C_A	12.4614	-0.795964	1.36576	-0.582798	0.560029	1	0.12275
C1_00330C_A	7.0524	-0.795318	1.52914	-0.52011	0.602987	1	0.126307
CR_02740W_A	11.8883	-0.794819	1.37099	-0.579742	0.562088	1	0.12275
CR_07040W_A	7.64479	-0.794502	1.62694	-0.48834	0.625309	1	0.12275
CR_07730W_A	40.1888	-0.793443	0.65752	-1.20672	0.22754	0.70238	2.88894
C3_07390C_A	3.27551	-0.791051	2.4523	-0.322576	0.747017	1	0
CR_08360C_A	31.4968	-0.791012	2.37073	-0.333658	0.738638	0.959164	2.88894
C2_05490W_A	1.13237	-0.790105	3.45246	-0.228853	0.818983	1	0
C1_04140W_A	1.13237	-0.790105	3.45246	-0.228853	0.818983	1	0
C1_11920W_A	16.2265	-0.789754	1.02511	-0.770406	0.441059	1	0.242098
C1_08940C_A	42.1361	-0.789445	0.584295	-1.35111	0.176661	0.629247	2.9232
C1_12520W_A	8.82958	-0.787281	1.42837	-0.551175	0.581514	1	0.0561166
C4_03560W_A	19.5968	-0.787146	0.960101	-0.819857	0.412297	1	0.12275
C2_00590W_A	3.5697	-0.786598	2.14851	-0.366113	0.714281	1	0
C1_07900W_A	345.741	-0.786595	0.214107	-3.67385	0.000238927	0.00499346	2.66788
C2_10030C_A	541.956	-0.785662	0.21645	-3.62976	0.000283681	0.00529522	2.95837
C7_02640W_A	24.0745	-0.785338	2.18296	-0.359758	0.719028	0.946434	2.95837
C1_03860C_A	50.4293	-0.784712	0.5787	-1.35599	0.175102	0.629286	2.88894
C2_05570C_A	53.0377	-0.783755	0.507587	-1.54408	0.122569	0.523984	2.95837
C2_10700C_A	10.4597	-0.782001	1.47849	-0.52892	0.596861	1	0.242098
C5_04090C_A	27.1235	-0.779851	0.753033	-1.03561	0.300383	0.769416	2.9232
C3_06550C_A	9.74933	-0.779234	1.56473	-0.497999	0.618485	1	0.126307
C1_14080W_A	40.7913	-0.778438	0.731082	-1.06478	0.286977	0.754616	2.88894
C4_06060W_A	59.5419	-0.778401	0.497292	-1.56528	0.117517	0.517936	2.9232
C1_03300C_A	9.68918	-0.777201	1.38023	-0.563094	0.573371	1	0.0561166
C2_03560C_A	6.07674	-0.775889	1.75606	-0.441836	0.658608	1	0
C1_06340W_A	23.2886	-0.775572	0.811753	-0.955428	0.339361	0.811383	2.66788
C5_04330W_A	16.1298	-0.775427	1.02779	-0.754459	0.450574	1	0.0561166
C6_00140C_A	4.4217	-0.774995	1.91079	-0.405589	0.685045	1	0
C2_06680W_A	6.45433	-0.774303	1.97518	-0.392015	0.695047	1	0
CR_10670W_A	16.85	-0.771856	0.983338	-0.784934	0.432492	1	0.126307
C5_04710W_A	9.28462	-0.771849	1.36401	-0.565868	0.571484	1	0.126307
C2_00160C_A	11.329	-0.771688	1.41502	-0.545355	0.58551	1	0.126307
C5_00150C_A	38.4754	-0.771266	0.635724	-1.21321	0.22505	0.72357	2.66788
CR_10640W_A	2.8419	-0.771166	2.56912	-0.300167	0.764049	1	0
C4_03550W_A	16.1085	-0.770922	1.03314	-0.74619	0.455552	1	0.0561166
C4_01840C_A	48.6757	-0.770488	0.557527	-1.38197	0.166979	0.617956	2.90062
C2_04830W_A	9.45307	-0.769563	1.5087	-0.510082	0.609994	1	0.12275
C3_07790W_A	8.15017	-0.769313	1.59261	-0.483053	0.629058	1	0.242098
C4_00030C_A	19.58	-0.768303	1.09229	-0.70339	0.481813	1	0.242098
C1_13660W_A	10.1946	-0.768029	1.49145	-0.514954	0.606585	1	0.12275
C3_04220C_A	8.16955	-0.767656	1.58331	-0.484842	0.627788	1	0.123191
C5_05080W_A	14.9319	-0.767556	1.26257	-0.607932	0.543232	1	0.12275
C3_02780W_A	53.8138	-0.767406	0.518112	-1.48116	0.138564	0.542207	2.95837
CR_09040W_A	6.1755	-0.766118	1.75657	-0.436145	0.662731	1	0
C5_02670W_A	7.5481	-0.765662	1.63466	-0.468393	0.639503	1	0.12275
C1_14250C_A	19.9903	-0.765194	0.923984	-0.828147	0.407587	1	0.242098
C1_00700W_A	5.71284	-0.764188	1.80739	-0.422814	0.672431	1	0
C1_13020C_A	33.4985	-0.763625	0.660468	-1.15619	0.247604	0.72357	2.9232
C3_01930W_A	23.1222	-0.763096	0.816683	-0.934384	0.350106	0.803198	2.90062
C1_02680C_A	10.4211	-0.762296	1.46932	-0.518808	0.603895	1	0.242098
C1_13490C_A	10.0048	-0.761752	1.37794	-0.55282	0.580386	1	0.242098
C5_05400W_A	11.6659	-0.760405	1.39978	-0.543233	0.586969	1	0.126307
CR_10370W_A	38.1434	-0.760017	0.79669	-0.953968	0.3401	0.796342	2.88894
C2_01470W_A	31.762	-0.759719	0.722936	-1.05088	0.293313	0.784217	2.66788
CR_04290W_A	1.46929	-0.759679	3.19622	-0.23768	0.812129	1	0
C4_02620C_A	34.9002	-0.759673	0.711048	-1.06838	0.285347	0.753726	2.88894
C3_04970C_A	33.3534	-0.759248	0.659773	-1.15077	0.249826	0.728369	2.90062
C4_01170C_A	23.9858	-0.758823	0.845915	-0.897044	0.369695	0.811383	2.9232
C3_06000W_A	17.129	-0.757089	1.02083	-0.74164	0.458306	1	0.0561166
C3_06150W_A	23.6454	-0.756433	0.801071	-0.944277	0.345028	0.796079	2.95837
C4_00010W_A	11.7647	-0.756146	1.38233	-0.547006	0.584374	1	0.126307
C1_12380C_A	23.7533	-0.75599	0.816568	-0.925814	0.354542	0.804304	2.90062
CR_05510W_A	23.8912	-0.755015	0.801051	-0.94253	0.345921	0.796079	2.95837
C5_02760W_A	5.8813	-0.753359	1.79119	-0.42059	0.674054	1	0
C4_00340W_A	30.6027	-0.753165	0.688067	-1.09461	0.273687	0.73842	2.95837
C2_03840C_A	19.1616	-0.75315	0.912199	-0.825643	0.409007	1	0.242098
C5_02850W_A	42.8396	-0.750605	0.594838	-1.26187	0.206997	0.676261	2.90062
C1_05800C_A	1.63775	-0.750543	3.08809	-0.243045	0.807971	1	0
C2_01040W_A	1.63775	-0.750543	3.08809	-0.243045	0.807971	1	0
C5_04930C_A	1.63775	-0.750543	3.08809	-0.243045	0.807971	1	0
C2_04160W_A	1.63775	-0.750543	3.08809	-0.243045	0.807971	1	0
C6_00380C_A	1.63775	-0.750543	3.08809	-0.243045	0.807971	1	0
C5_02280C_A	1.63775	-0.750543	3.08809	-0.243045	0.807971	1	0
C3_00510W_A	1.63775	-0.750543	3.08809	-0.243045	0.807971	1	0
C5_05140W_A	4.53774	-0.748952	2.05092	-0.365178	0.714978	1	0
C1_10780C_A	15.4698	-0.748592	1.07546	-0.696068	0.486386	1	0.12275
C2_02490C_A	12.1306	-0.745776	1.36444	-0.54658	0.584667	1	0.0561166
CR_01050C_A	16.1243	-0.745042	1.00982	-0.7378	0.460636	1	0.12275
C1_12760W_A	2.40829	-0.744895	2.71221	-0.274645	0.783589	1	0
C6_04310W_A	2.40829	-0.744895	2.71221	-0.274645	0.783589	1	0
C3_05580C_A	14.8138	-0.743789	1.07797	-0.689987	0.490202	1	0.126307
C1_11650W_A	46.0668	-0.74313	0.564492	-1.31646	0.188021	0.645176	2.90062
C6_00930C_A	63.084	-0.742435	0.56431	-1.31565	0.188292	0.64736	2.88894
C4_04450C_A	49.3175	-0.742303	0.533801	-1.3906	0.164347	0.612965	2.88894
C1_01390C_A	24.3753	-0.740998	0.779935	-0.950077	0.342073	0.796079	2.95837
C2_05260W_A	46.1564	-0.740745	0.551532	-1.34307	0.17925	0.630946	2.9232
C4_06340W_A	71.5647	-0.739845	0.4798	-1.54199	0.123077	0.540435	2.66788
CR_01300W_A	1.80622	-0.739829	2.99233	-0.247242	0.804721	1	0
CR_01290C_A	76.6833	-0.739329	0.421536	-1.75389	0.0794491	0.437407	2.66788
C3_04730C_A	2.17012	-0.739117	2.583	-0.286147	0.774766	1	0
CR_10720W_A	13.5903	-0.738467	1.12125	-0.658609	0.510147	1	0.12275
C3_04750W_A	13.0579	-0.737352	1.15962	-0.635856	0.52487	1	0.123191
CR_05220C_A	15.1837	-0.73695	1.25373	-0.587805	0.556663	1	0.126307
C1_05700W_A	37.2566	-0.736628	0.682062	-1.08	0.280142	0.742515	2.90062
CR_10510W_A	15.288	-0.735185	1.11387	-0.660029	0.509235	1	0.0561166
C1_03080C_A	10.4929	-0.734846	1.46601	-0.501256	0.616191	1	0.0561166
C1_07550W_A	10.6262	-0.734139	1.34037	-0.547714	0.583889	1	0.12275
C5_04000W_A	9.70093	-0.733694	1.33168	-0.550953	0.581666	1	0.242098
C4_05550C_A	34.9398	-0.733144	0.761715	-0.962492	0.335802	0.810387	2.66788
C1_14360C_A	18.8676	-0.73168	0.965718	-0.757654	0.448658	1	0.242098
C1_10280C_A	20.831	-0.731224	1.06132	-0.688977	0.490838	1	0.123191
C4_01450W_A	12.7348	-0.730416	1.34451	-0.543259	0.586951	1	0.126307
CR_02120C_A	6.14852	-0.729926	1.74985	-0.417136	0.676579	1	0
C4_00310C_A	29.2439	-0.729008	0.758786	-0.960756	0.336675	0.796079	2.90062
C1_09320C_A	5.92403	-0.728267	2.02085	-0.360376	0.718566	1	0
C1_05980W_A	5.92403	-0.728267	2.02085	-0.360376	0.718566	1	0
C2_10790C_A	10.4715	-0.727028	1.29004	-0.563571	0.573046	1	0.242098
C3_01020W_A	122.829	-0.726578	0.333317	-2.17984	0.0292691	0.202926	2.95837
C1_03930W_A	1.53345	-0.726243	3.33181	-0.217972	0.827451	1	0
C6_03000C_A	3.47302	-0.723041	2.17198	-0.332894	0.739214	1	0
C7_02940C_A	5.32196	-0.722179	2.08503	-0.346363	0.72907	1	0
C1_02900C_A	9.32941	-0.721284	1.52052	-0.474367	0.635238	1	0.126307
CR_09090C_A	2.57675	-0.720742	2.65185	-0.271788	0.785785	1	0
C5_02440C_A	6.85903	-0.718902	1.54795	-0.464423	0.642345	1	0.242098
C1_01890C_A	38.9549	-0.718421	0.670533	-1.07142	0.283981	0.752712	2.88894
CR_09330C_A	44.9951	-0.718283	0.650418	-1.10434	0.269445	0.73842	2.9232
C3_05530W_A	38.9488	-0.716978	0.626854	-1.14377	0.252718	0.725733	2.95837
C7_04290W_A	23.3844	-0.714692	0.80119	-0.892039	0.372372	0.837604	2.66788
C3_01800C_A	64.663	-0.713992	0.50936	-1.40174	0.160992	0.603698	2.90062
CR_01320C_A	92.1396	-0.713475	0.387962	-1.83903	0.0659104	0.364531	2.95837
CR_00430C_A	4.17384	-0.712918	2.04681	-0.348307	0.727609	1	0
CR_09980W_A	35.3231	-0.711867	0.649934	-1.09529	0.27339	0.73842	2.90062
C2_07470W_A	24.7392	-0.711811	0.796914	-0.893209	0.371745	0.813778	2.88894
C7_00940W_A	49.9414	-0.709425	0.555682	-1.27667	0.201717	0.667171	2.9232
C5_04300C_A	26.8457	-0.708488	0.741432	-0.955567	0.339291	0.796079	2.88894
C1_12120W_A	11.3235	-0.708356	1.25071	-0.566362	0.571148	1	0.0561166
C5_00620W_A	1.97468	-0.708284	2.89859	-0.244355	0.806956	1	0
C2_06470W_A	1.97468	-0.708284	2.89859	-0.244355	0.806956	1	0
C2_01150W_A	12.6436	-0.70821	1.17522	-0.602617	0.546763	1	0.242098
C1_02600W_A	11.7032	-0.70729	1.50103	-0.471205	0.637495	1	0.12275
C1_06920C_A	4.41201	-0.707181	1.98235	-0.356739	0.721287	1	0
C2_05050C_A	11.4782	-0.705519	1.29611	-0.544334	0.586212	1	0.12275
C3_01860C_A	39.8766	-0.705204	0.628436	-1.12216	0.261796	0.73842	2.90062
C5_04770W_A	6.6539	-0.704789	1.70641	-0.413026	0.679588	1	0
C1_07130C_A	11.3759	-0.704764	1.41381	-0.498487	0.618141	1	0.126307
C5_00580W_A	34.1464	-0.704017	0.646335	-1.08924	0.276046	0.738581	2.90062
C1_04640W_A	49.4768	-0.702955	0.532582	-1.3199	0.186869	0.637443	2.95837
C2_08810C_A	150.251	-0.702018	0.303644	-2.31198	0.0207787	0.160079	2.90062
C1_10490W_A	43.0495	-0.701987	0.587037	-1.19582	0.231769	0.711018	2.88894
C1_00830W_A	8.74671	-0.701493	1.47625	-0.475186	0.634654	1	0.0561166
C1_00940W_A	10.3983	-0.69883	1.51072	-0.462581	0.643665	1	0.126307
C5_01760C_A	30.3441	-0.697433	0.730885	-0.95423	0.339967	0.796079	2.9232
CR_02160W_A	26.8168	-0.696934	0.755169	-0.922886	0.356067	0.802407	2.95837
C3_05650W_A	87.5423	-0.696605	0.390572	-1.78355	0.0744966	0.398642	2.90062
C2_05720C_A	65.9982	-0.696197	0.466052	-1.49382	0.135223	0.571252	2.66788
C4_03290W_A	48.8749	-0.695793	0.567388	-1.22631	0.220082	0.688485	2.9232
C6_04500C_A	31.2831	-0.695333	0.725444	-0.958493	0.337814	0.796079	2.9232
C2_05140W_A	15.6097	-0.69506	1.06418	-0.653141	0.513665	1	0.123191
C3_03150W_A	6.59788	-0.694197	1.96322	-0.353602	0.723637	1	0
C3_06210C_A	25.0085	-0.694038	0.815414	-0.851148	0.394687	0.833713	2.90062
CR_10590W_A	5.05681	-0.693291	2.11889	-0.327195	0.74352	1	0
C1_00120C_A	9.33147	-0.692947	1.51895	-0.456201	0.648245	1	0.12275
C7_03650W_A	5.98212	-0.69152	1.78254	-0.38794	0.69806	1	0
C4_02960W_A	26.4335	-0.691247	0.742801	-0.930594	0.352063	0.802407	2.9232
C1_11640C_A	8.70036	-0.690968	1.57241	-0.439433	0.660348	1	0.0561166
CR_00740C_A	59.5831	-0.690715	0.520998	-1.32575	0.184921	0.637443	2.9232
C1_00350C_A	135.167	-0.689991	0.370796	-1.86084	0.0627669	0.353182	2.95837
C4_03380C_A	8.44851	-0.689944	1.58176	-0.436187	0.662701	1	0.123191
C1_06770W_A	8.63065	-0.689893	1.56348	-0.441253	0.65903	1	0.126307
C2_06090W_A	8.63065	-0.689893	1.56348	-0.441253	0.65903	1	0.0561166
CR_04370W_A	5.21159	-0.689861	1.8978	-0.363506	0.716227	1	0
C3_02820C_A	28.8205	-0.688991	0.736329	-0.935712	0.349422	0.801968	2.9232
C2_06190W_A	17.5306	-0.688807	1.16174	-0.592909	0.553242	1	0.242098
C2_10750C_A	33.6237	-0.688429	0.703233	-0.978948	0.327605	0.790164	2.9232
C1_08430W_A	15.3309	-0.687609	1.04226	-0.65973	0.509427	1	0.126307
CR_01240C_A	110.803	-0.686106	0.342387	-2.00389	0.0450821	0.287243	2.88894
C5_02930C_A	46.6584	-0.684827	0.564328	-1.21353	0.224928	0.691993	2.95837
CR_01260W_A	10.5086	-0.68397	1.45654	-0.469584	0.638652	1	0.0561166
C1_02510W_A	4.60952	-0.683724	2.03895	-0.335332	0.737375	1	0
C1_12700W_A	8.3131	-0.683626	1.53336	-0.445834	0.655717	1	0.123191
C2_08100W_A	5.22527	-0.683426	2.09649	-0.325986	0.744435	1	0
CR_07480W_A	5.22527	-0.683426	2.09649	-0.325986	0.744435	1	0
C3_04860W_A	19.8554	-0.683217	0.903415	-0.75626	0.449493	1	0.126307
C2_09320C_A	26.6911	-0.682566	0.878732	-0.776762	0.437299	0.856562	2.9232
C2_07490W_A	16.0124	-0.681822	1.02385	-0.665937	0.505451	1	0.0561166
C1_04030W_A	7.08958	-0.681413	1.67272	-0.407369	0.683737	1	0.242098
C1_03540C_A	4.17591	-0.68132	2.23278	-0.305144	0.760256	1	0
CR_00310C_A	124.257	-0.681254	0.362964	-1.87692	0.0605289	0.350787	2.9232
C1_11890W_A	2.91367	-0.681197	2.54622	-0.267533	0.789059	1	0
C1_14590C_A	2.91367	-0.681197	2.54622	-0.267533	0.789059	1	0
CR_00700W_A	2.91367	-0.681197	2.54622	-0.267533	0.789059	1	0
C3_03730C_A	13.1918	-0.681079	1.17556	-0.579364	0.562343	1	0.242098
C2_00540W_A	31.9628	-0.681039	0.757237	-0.899374	0.368453	0.83431	2.66788
C3_02960C_A	23.0072	-0.680668	0.864043	-0.787771	0.43083	0.875117	2.66788
C5_02530W_A	9.81543	-0.680469	1.37446	-0.495082	0.620542	1	0.123191
C3_04250W_A	11.8889	-0.680345	1.24787	-0.545205	0.585613	1	0.242098
C2_00100C_A	75.5332	-0.680323	0.43394	-1.56778	0.116932	0.517936	2.90062
C3_00630W_A	27.3628	-0.680263	0.754982	-0.901031	0.367572	0.811383	2.90062
C4_04670C_A	33.0799	-0.679563	0.763209	-0.890403	0.37325	0.810864	2.95837
CR_05790C_A	10.6074	-0.679394	1.44335	-0.470706	0.63785	1	0.242098
C2_07440C_A	10.6771	-0.679313	1.44804	-0.469125	0.63898	1	0.12275
C7_00130W_A	3.9784	-0.679257	2.06175	-0.329456	0.741811	1	0
C2_00280C_A	4.06747	-0.678555	1.90693	-0.355836	0.721964	1	0
C2_00330C_A	22.3487	-0.677918	0.837071	-0.809869	0.418015	0.842003	2.95837
CR_09310W_A	9.90657	-0.676952	1.48888	-0.454673	0.649345	1	0.126307
C6_03720W_A	57.8281	-0.675311	0.490363	-1.37716	0.168461	0.637443	2.66788
C2_04310W_A	79.1946	-0.67471	0.410535	-1.64349	0.100282	0.502727	2.66788
C1_00230C_A	8.50492	-0.673252	1.61415	-0.417093	0.67661	1	0.0561166
C1_13550C_A	12.7123	-0.672894	4.54363	-0.148096	0.882267	1	0.126307
C3_00830C_A	31.6843	-0.672624	0.688601	-0.976798	0.328669	0.793509	2.88894
C6_02590C_A	11.7148	-0.672517	1.38664	-0.484998	0.627678	1	0.12275
CR_04130C_A	30.8806	-0.671668	0.71976	-0.933185	0.350725	0.820638	2.66788
C1_06050C_A	15.4592	-0.670537	1.24608	-0.538117	0.590497	1	0.126307
C6_04050W_A	3.20787	-0.670315	2.24176	-0.299012	0.764931	1	0
C3_06280W_A	18.6299	-0.668524	1.00204	-0.667162	0.504669	1	0.123191
CR_08920W_A	10.2435	-0.667597	1.47094	-0.453858	0.649931	1	0.12275
C2_00520W_A	30.1355	-0.66673	0.696442	-0.957338	0.338397	0.796079	2.9232
C1_02150W_A	24.0873	-0.665374	0.813757	-0.817656	0.413553	0.849215	2.88894
C2_01860C_A	3.08213	-0.664791	2.49935	-0.265986	0.79025	1	0
CR_03760W_A	3.08213	-0.664791	2.49935	-0.265986	0.79025	1	0
C4_04290W_A	36.075	-0.663627	0.683707	-0.97063	0.331732	0.790164	2.95837
C3_05360C_A	50.281	-0.661349	0.543674	-1.21645	0.223815	0.696033	2.88894
CR_04460C_A	7.3568	-0.660927	1.54041	-0.429059	0.66788	1	0.126307
CR_08460W_A	147.149	-0.660915	0.338673	-1.95148	0.0509998	0.311165	2.88894
C1_12250C_A	20.1832	-0.660284	1.09091	-0.605258	0.545008	1	0.242098
C7_01340W_A	8.01735	-0.659438	4.19691	-0.157124	0.875147	1	0.242098
CR_03350C_A	14.1985	-0.658527	1.09674	-0.600441	0.548212	1	0.242098
C3_05190C_A	73.3851	-0.658233	0.439441	-1.49789	0.134162	0.540435	2.9232
C2_07070W_A	4.02113	-0.656707	2.28841	-0.286972	0.774134	1	0
C2_06100W_A	42.3172	-0.656187	0.57084	-1.14951	0.250345	0.73842	2.66788
C2_02410W_A	22.165	-0.655847	0.87303	-0.751231	0.452514	0.8837	2.66788
C2_04890C_A	0.265149	-0.65582	4.84733	-0.135295	0.892378	1	0
C1_13000W_A	0.265149	-0.65582	4.84733	-0.135295	0.892378	1	0
C3_01180C_A	18.1072	-0.655755	0.96397	-0.680265	0.496337	1	0.0561166
CR_00180C_A	10.7489	-0.654507	1.44485	-0.452992	0.650554	1	0.12275
C1_13280C_A	28.2132	-0.653159	0.732438	-0.89176	0.372522	0.811383	2.9232
C2_03060W_A	71.4303	-0.653126	0.433881	-1.50531	0.132244	0.535953	2.95837
CR_01680C_A	52.4053	-0.652571	0.526063	-1.24048	0.214798	0.686177	2.9232
C4_00800W_A	5.88544	-0.652539	1.79664	-0.3632	0.716456	1	0
C1_11860W_A	70.1196	-0.652315	0.475492	-1.37187	0.170103	0.619952	2.9232
C2_09150W_A	32.4981	-0.651265	0.696819	-0.934625	0.349981	0.803324	2.88894
C7_03320C_A	26.3216	-0.650281	0.762432	-0.852904	0.393713	0.83172	2.9232
C5_04520W_A	8.10035	-0.646988	1.59879	-0.404672	0.685718	1	0.126307
C2_00950C_A	9.97228	-0.646067	1.35959	-0.475194	0.634649	1	0.123191
C4_02010C_A	4.48379	-0.645959	1.97061	-0.327797	0.743065	1	0
C7_03790W_A	4.18959	-0.645778	2.25702	-0.286119	0.774787	1	0
C4_04320W_A	201.726	-0.645464	0.258989	-2.49224	0.012694	0.11219	2.9232
C1_06960W_A	23.7315	-0.644168	0.793217	-0.812096	0.416737	0.86508	2.66788
C2_03420C_A	15.3447	-0.643457	1.13111	-0.568872	0.569443	1	0.12275
C7_03490W_A	35.4699	-0.643383	0.645589	-0.996582	0.318967	0.784757	2.88894
C1_03910C_A	10.0944	-0.642948	1.3329	-0.482366	0.629546	1	0.12275
C4_04430W_A	11.4227	-0.638988	1.41266	-0.45233	0.651031	1	0.126307
C6_02350C_A	6.22236	-0.638365	1.75686	-0.363356	0.716339	1	0
C1_13220C_A	37.0924	-0.637918	0.656634	-0.971497	0.331301	0.808971	2.66788
C2_10360C_A	3.41906	-0.637016	2.41504	-0.263771	0.791956	1	0
C5_00060C_A	11.01	-0.636721	1.31452	-0.484376	0.628119	1	0.126307
CR_00070W_A	20.2122	-0.636256	0.926646	-0.686623	0.492321	1	0.126307
C1_04230W_A	13.7949	-0.635874	4.58962	-0.138546	0.889809	1	0.126307
C1_03640C_A	5.28336	-0.635573	1.88906	-0.33645	0.736532	1	0
C7_02430C_A	5.28336	-0.635573	1.88906	-0.33645	0.736532	1	0
C4_03590C_A	66.4039	-0.635464	0.460646	-1.37951	0.167738	0.612965	2.95837
C1_00650C_A	32.1342	-0.634646	0.665518	-0.953612	0.34028	0.796079	2.9232
C2_06910W_A	26.8677	-0.634155	0.792926	-0.799766	0.423847	0.854055	2.9232
C7_01190W_A	5.12459	-0.63333	1.85389	-0.341623	0.732635	1	0
C7_00810W_A	12.5592	-0.63213	1.34423	-0.470254	0.638174	1	0.126307
C2_04480W_A	9.19658	-0.630598	4.30744	-0.146397	0.883608	1	0.242098
C2_03070C_A	7.36648	-0.629436	1.52975	-0.411463	0.680733	1	0.0561166
C2_00700W_A	26.0218	-0.629344	0.752516	-0.83632	0.402975	0.861759	2.66788
C7_01420W_A	4.82071	-0.627771	1.91764	-0.327367	0.74339	1	0
C4_04580W_A	85.432	-0.627376	0.412099	-1.52239	0.127911	0.535329	2.95837
C1_13480W_A	17.608	-0.627319	1.09767	-0.571502	0.56766	1	0.242098
C3_04360W_A	17.0873	-0.626497	0.974504	-0.642888	0.520297	1	0.0561166
C1_04820C_A	1.54107	-0.624006	3.14883	-0.198171	0.842912	1	0
C4_03770W_A	5.69	-0.623094	1.79905	-0.346346	0.729083	1	0
C5_03300C_A	37.7271	-0.622789	0.66204	-0.940713	0.346852	0.802407	2.88894
C6_02010C_A	27.8141	-0.622632	2.24489	-0.277356	0.781507	0.962515	2.88894
C3_07090W_A	79.8238	-0.622267	0.444201	-1.40087	0.161253	0.601145	2.9232
C4_05730W_A	9.82925	-0.621639	1.35296	-0.459465	0.6459	1	0.242098
C6_01490C_A	0.867221	-0.621265	3.71908	-0.167048	0.867332	1	0
CR_06600C_A	0.867221	-0.621265	3.71908	-0.167048	0.867332	1	0
C4_07260W_A	0.867221	-0.621265	3.71908	-0.167048	0.867332	1	0
C4_05890W_A	0.867221	-0.621265	3.71908	-0.167048	0.867332	1	0
C2_07960C_A	0.867221	-0.621265	3.71908	-0.167048	0.867332	1	0
C7_00630C_A	0.867221	-0.621265	3.71908	-0.167048	0.867332	1	0
C6_00860W_A	0.867221	-0.621265	3.71908	-0.167048	0.867332	1	0
C1_11680C_A	0.867221	-0.621265	3.71908	-0.167048	0.867332	1	0
C2_02190C_A	0.867221	-0.621265	3.71908	-0.167048	0.867332	1	0
C7_02310C_A	14.5009	-0.621115	1.08701	-0.571399	0.567729	1	0.126307
C7_02680W_A	6.72774	-0.620683	1.70651	-0.363714	0.716072	1	0
C5_00770C_A	12.9404	-0.61851	1.14439	-0.54047	0.588873	1	0.123191
C7_02300W_A	28.3161	-0.617648	0.726513	-0.850155	0.395239	0.833713	2.90062
C5_03730W_A	1.20414	-0.614593	3.39345	-0.181111	0.85628	1	0
CR_04260W_A	1.20414	-0.614593	3.39345	-0.181111	0.85628	1	0
C4_00920C_A	1.20414	-0.614593	3.39345	-0.181111	0.85628	1	0
C1_08000W_A	1.20414	-0.614593	3.39345	-0.181111	0.85628	1	0
CR_10850C_A	168.093	-0.614438	0.287496	-2.1372	0.0325813	0.226903	2.88894
C1_03750W_A	3.75598	-0.614412	2.34039	-0.262525	0.792916	1	0
C7_03150W_A	8.11972	-0.61275	1.54729	-0.396016	0.692093	1	0.12275
C3_07430W_A	1.03568	-0.610953	3.54101	-0.172537	0.863016	1	0
C7_02750W_A	1.03568	-0.610953	3.54101	-0.172537	0.863016	1	0
CR_08690C_A	14.253	-0.610773	1.09593	-0.557309	0.577317	1	0.0561166
C2_09730C_A	4.86344	-0.609872	2.14598	-0.284192	0.776263	1	0
C5_05060C_A	2.81699	-0.609665	2.57293	-0.236953	0.812693	1	0
C3_05130C_A	4.52252	-0.609178	2.26212	-0.269295	0.787703	1	0
C2_07460W_A	22.6246	-0.607717	0.840877	-0.722718	0.469853	0.870905	2.95837
C7_04130C_A	15.6083	-0.607415	1.0688	-0.568317	0.56982	1	0.12275
C1_08030W_A	40.7767	-0.606242	0.618202	-0.980653	0.326764	0.804304	2.66788
C2_02340C_A	103.575	-0.605857	0.364438	-1.66244	0.0964239	0.501369	2.66788
C5_00560W_A	20.6402	-0.605557	0.936174	-0.646843	0.517734	1	0.12275
C2_08630C_A	17.3275	-0.60509	0.966442	-0.626101	0.531249	1	0.0561166
C6_03100W_A	27.7476	-0.604914	0.743801	-0.813274	0.416061	0.85268	2.88894
C1_02290C_A	3.92444	-0.60455	2.30634	-0.262125	0.793225	1	0
C2_09560C_A	20.3654	-0.604196	0.892766	-0.676769	0.498552	1	0.12275
C1_10790W_A	296.959	-0.603686	0.223132	-2.70551	0.00681986	0.0708916	2.9232
C1_00850W_A	14.2438	-0.603141	1.27645	-0.472513	0.636561	1	0.0561166
CR_09700W_A	1.87799	-0.603132	2.94497	-0.204801	0.837728	1	0
C1_07470C_A	1.87799	-0.603132	2.94497	-0.204801	0.837728	1	0
C7_00950W_A	4.21864	-0.602836	2.01692	-0.298889	0.765024	1	0
C2_02990C_A	37.0497	-0.602765	0.626263	-0.962479	0.335809	0.796079	2.90062
C7_03480W_A	48.761	-0.602378	0.609457	-0.988384	0.322965	0.803324	2.66788
C1_00760W_A	14.9966	-0.601302	1.05867	-0.567978	0.57005	1	0.12275
C5_00480C_A	32.5002	-0.600489	0.671145	-0.894723	0.370935	0.810387	2.95837
C2_07110C_A	13.6046	-0.600447	1.13807	-0.527603	0.597775	1	0.0561166
C2_05150W_A	19.7899	-0.600206	1.13683	-0.527967	0.597522	1	0.12275
CR_09830W_A	5.01822	-0.599489	1.94559	-0.308128	0.757985	1	0
C6_00670W_A	16.726	-0.599441	1.18979	-0.503821	0.614387	1	0.123191
C5_03710C_A	87.0841	-0.598445	0.393168	-1.52211	0.127982	0.535953	2.88894
CR_04720C_A	44.6355	-0.59823	0.552723	-1.08233	0.279105	0.739	2.9232
CR_09380W_A	45.2263	-0.595674	0.562996	-1.05804	0.290035	0.781407	2.66788
C4_02280W_A	5.20036	-0.595547	2.09876	-0.283761	0.776593	1	0
CR_09490W_A	8.1609	-0.595493	4.21505	-0.141278	0.887651	1	0.126307
CR_10340W_A	43.6252	-0.595218	0.656545	-0.906591	0.364623	0.833713	2.66788
C4_04390W_A	27.754	-0.594977	2.25772	-0.263531	0.792142	0.965567	2.88894
C3_05000W_A	51.0426	-0.594964	0.539059	-1.10371	0.269719	0.73842	2.90062
C2_09930W_A	10.2904	-0.594754	1.46954	-0.404722	0.685682	1	0.242098
C1_00610W_A	58.8905	-0.594207	0.541333	-1.09767	0.272347	0.73842	2.88894
[truncated: 3,948 more rows]

## Sheet: WT+vs.WT-GO
The genes categorized using the Process Ontology in the CGD Gene Ontology Term Finder
[truncated: 46 more rows]

[truncated: 4 more sheets: ste11-vs.WT-GO, ste11-vs.WT+GO, MAPK, cek2- vs. WT-]
